# Supplementary material
Source: PubMed Central journal article supplement (PMC7088259)
Supplement: 10989_2019_9951_MOESM3_ESM.pdf [file 10989_2019_9951_MOESM3_ESM.pdf]

# Tem\_1ara

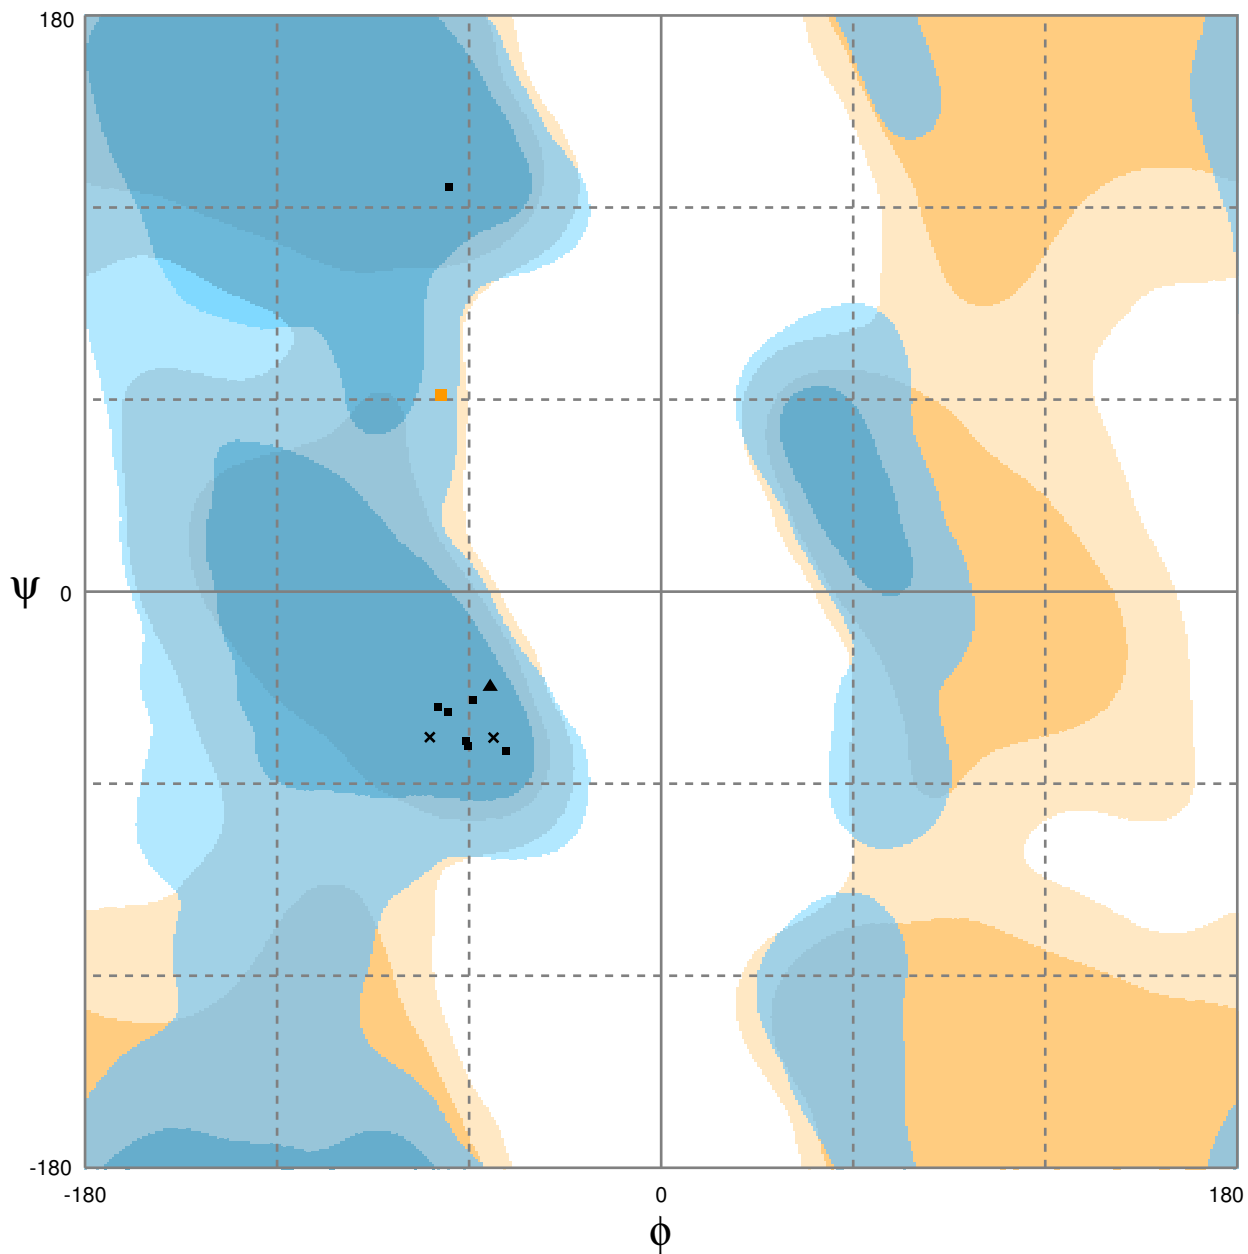

|     |                                  |     |                                 |
|-----|----------------------------------|-----|---------------------------------|
| ■ ▲ | General/Pre-Pro/Proline Favoured | ■ ▲ | General/Pre-Pro/Proline Allowed |
| ×   | Glycine Favoured                 | ×   | Glycine Allowed                 |

|                                                         |              |
|---------------------------------------------------------|--------------|
| Number of residues in favoured region (~98.0% expected) | : 10 (90.9%) |
| Number of residues in allowed region (~2.0% expected)   | : 1 (9.1%)   |
| Number of residues in outlier region                    | : 0 (0.0%)   |

RAMPAGE by Paul de Bakker and Simon Lovell available at <http://www-cryst.bioc.cam.ac.uk/rampage/>

Please cite: S.C. Lovell, I.W. Davis, W.B. Arendall III, P.I.W. de Bakker, J.M. Word, M.G. Prisant, J.S. Richardson & D.C. Richardson (2002) Structure validation by  $C\alpha$  geometry:  $\phi/\psi$  and  $C\beta$  deviation. *Proteins: Structure, Function & Genetics*. **50**: 437-450

# Tem\_1aua

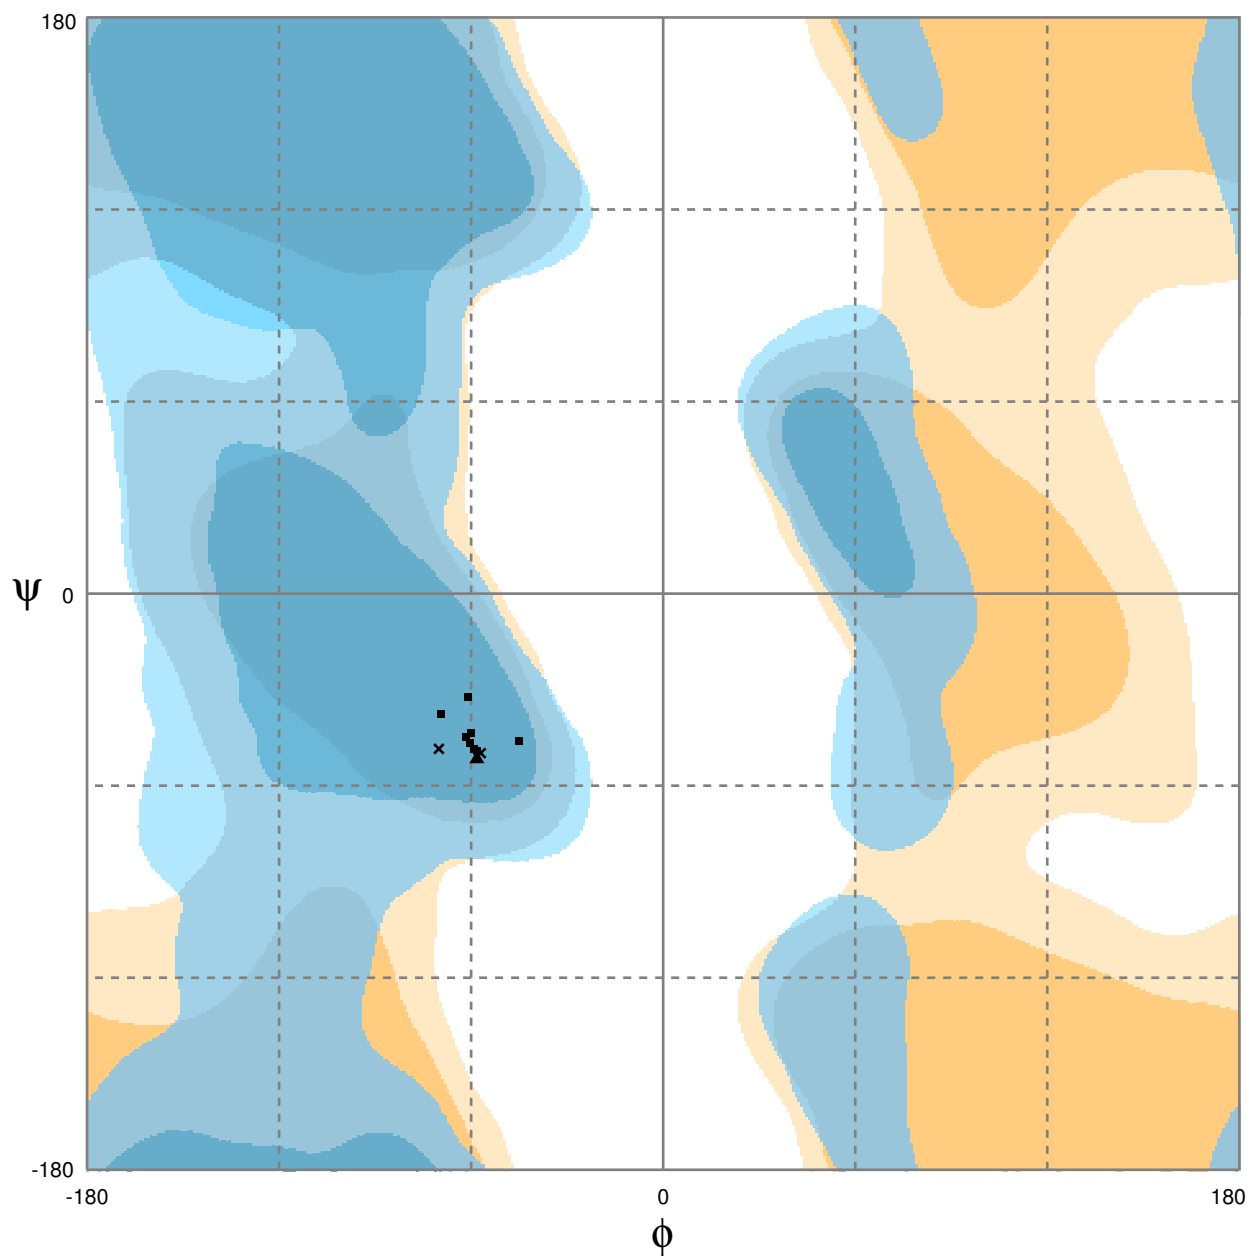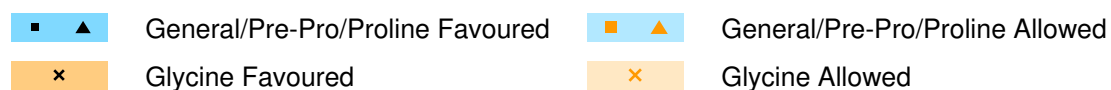

|                                                         |               |
|---------------------------------------------------------|---------------|
| Number of residues in favoured region (~98.0% expected) | : 11 (100.0%) |
| Number of residues in allowed region (~2.0% expected)   | : 0 (0.0%)    |
| Number of residues in outlier region                    | : 0 (0.0%)    |

RAMPAGE by Paul de Bakker and Simon Lovell available at <http://www-cryst.bioc.cam.ac.uk/rampage/>

Please cite: S.C. Lovell, I.W. Davis, W.B. Arendall III, P.I.W. de Bakker, J.M. Word, M.G. Prisant, J.S. Richardson & D.C. Richardson (2002) Structure validation by  $C\alpha$  geometry:  $\phi/\psi$  and  $C\beta$  deviation. *Proteins: Structure, Function & Genetics*. **50**: 437-450

# Tem\_1bya

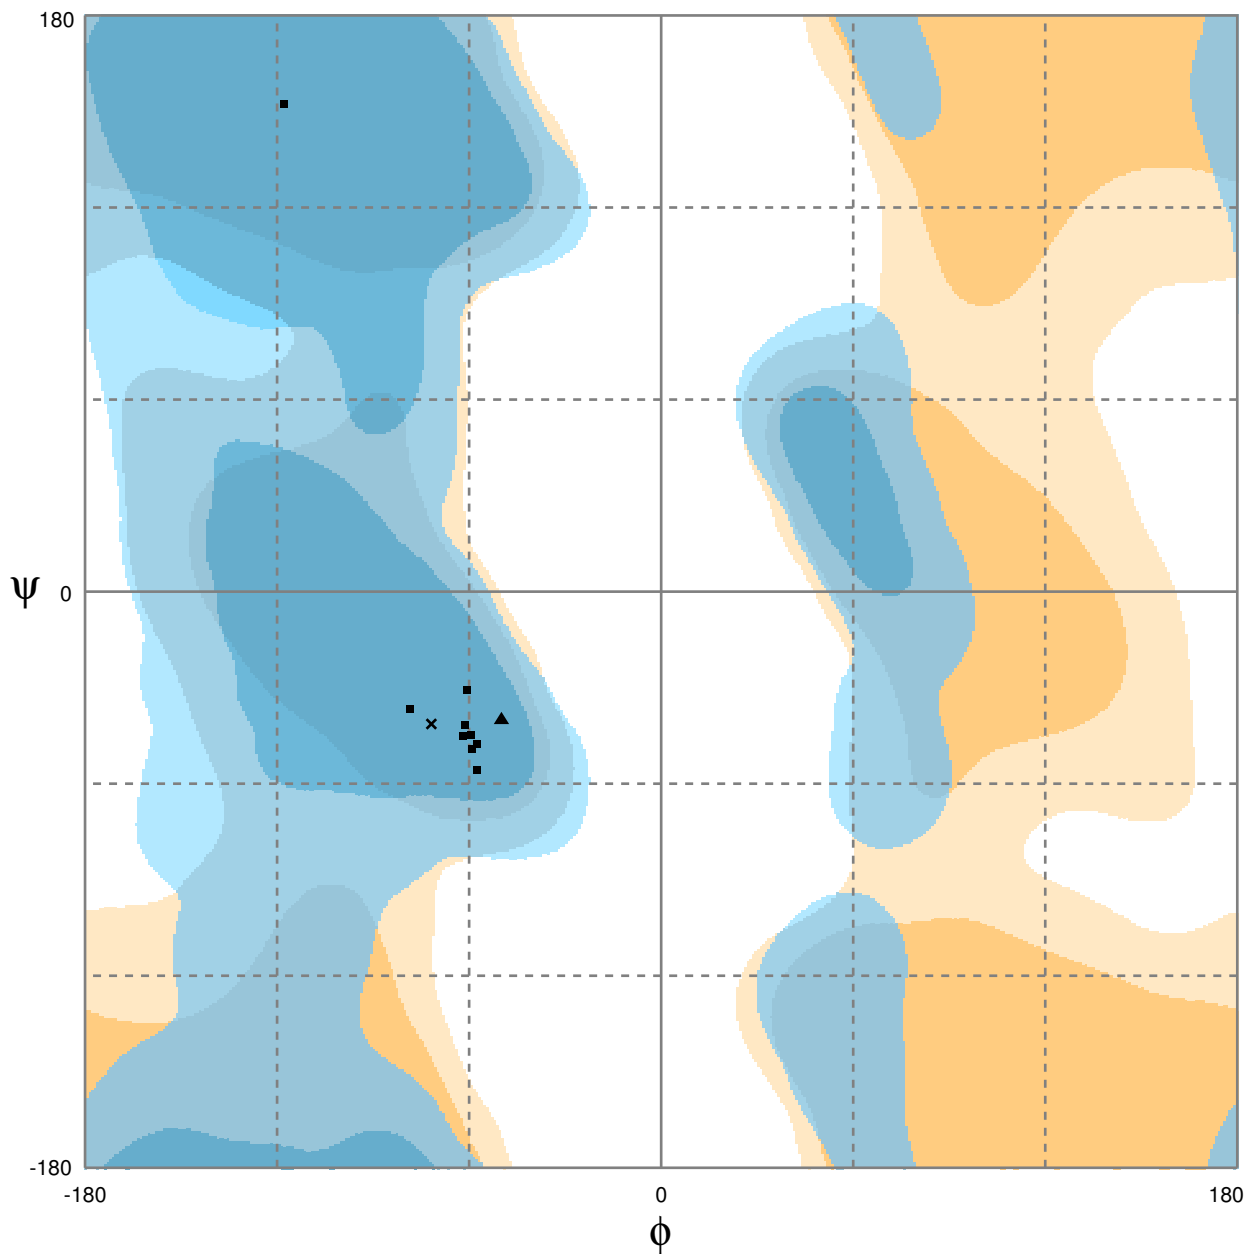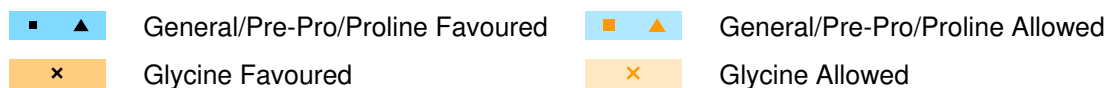

|                                                         |               |
|---------------------------------------------------------|---------------|
| Number of residues in favoured region (~98.0% expected) | : 11 (100.0%) |
| Number of residues in allowed region (~2.0% expected)   | : 0 (0.0%)    |
| Number of residues in outlier region                    | : 0 (0.0%)    |

RAMPAGE by Paul de Bakker and Simon Lovell available at <http://www-cryst.bioc.cam.ac.uk/rampage/>

Please cite: S.C. Lovell, I.W. Davis, W.B. Arendall III, P.I.W. de Bakker, J.M. Word, M.G. Prisant, J.S. Richardson & D.C. Richardson (2002) Structure validation by  $C\alpha$  geometry:  $\phi/\psi$  and  $C\beta$  deviation. *Proteins: Structure, Function & Genetics*. **50**: 437-450

# Tem\_1ca

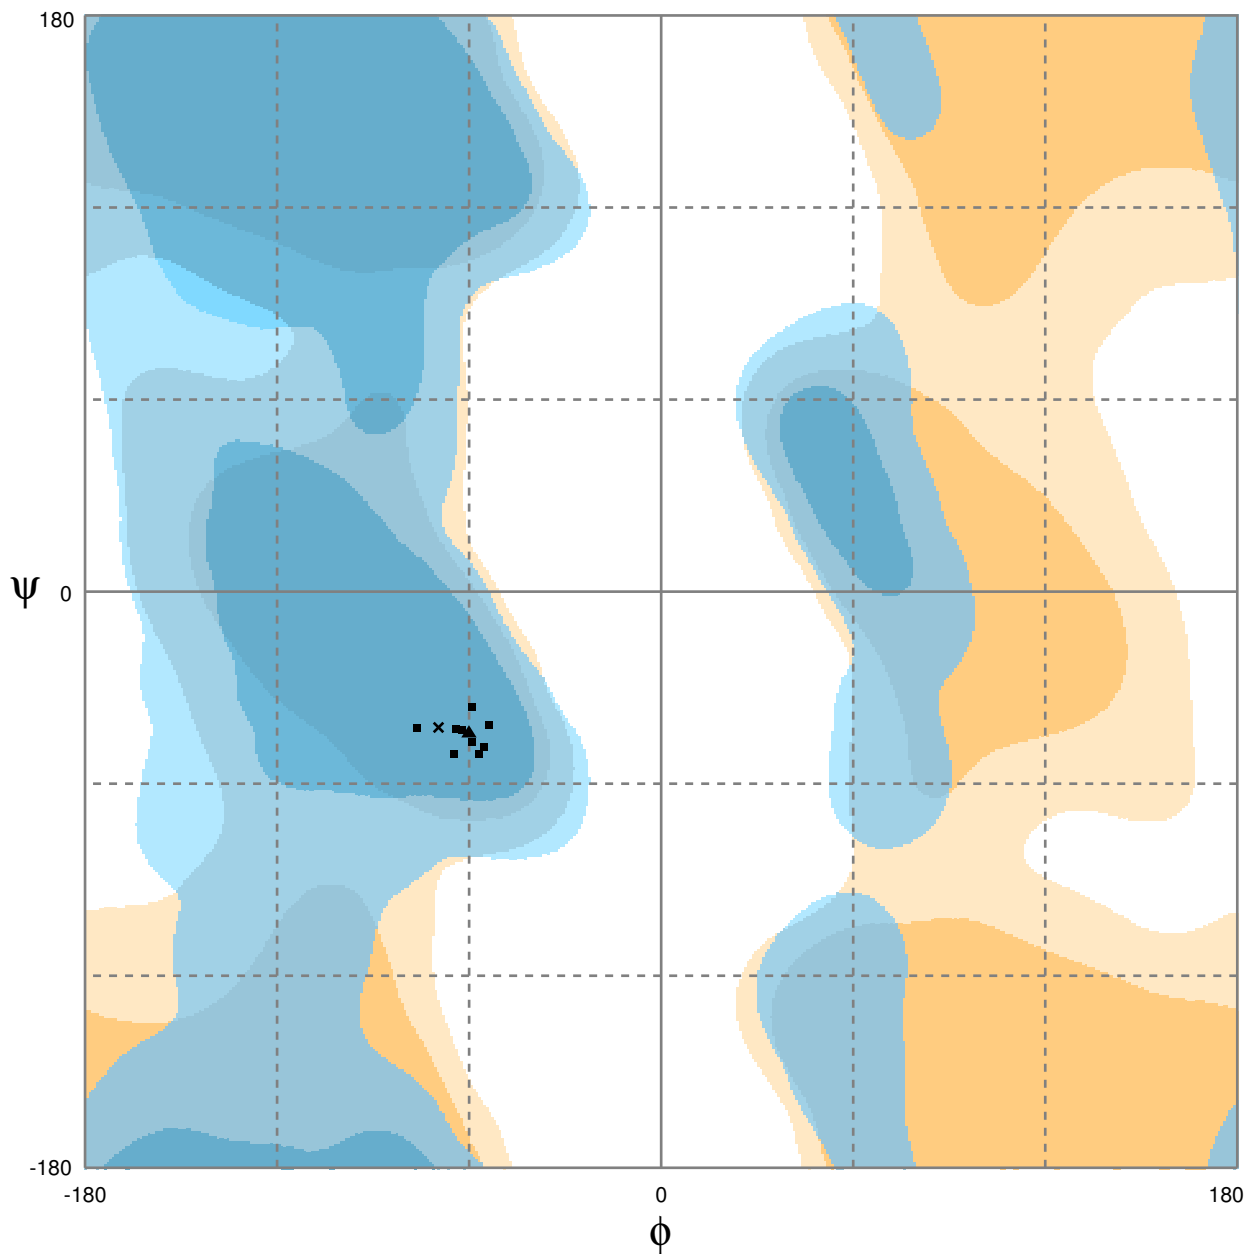

|                                                         |               |
|---------------------------------------------------------|---------------|
| Number of residues in favoured region (~98.0% expected) | : 11 (100.0%) |
| Number of residues in allowed region (~2.0% expected)   | : 0 (0.0%)    |
| Number of residues in outlier region                    | : 0 (0.0%)    |

RAMPAGE by Paul de Bakker and Simon Lovell available at <http://www-cryst.bioc.cam.ac.uk/rampage/>

Please cite: S.C. Lovell, I.W. Davis, W.B. Arendall III, P.I.W. de Bakker, J.M. Word, M.G. Prisant, J.S. Richardson & D.C. Richardson (2002) Structure validation by  $C\alpha$  geometry:  $\phi/\psi$  and  $C\beta$  deviation. *Proteins: Structure, Function & Genetics*. **50**: 437-450

# Tem\_1cb

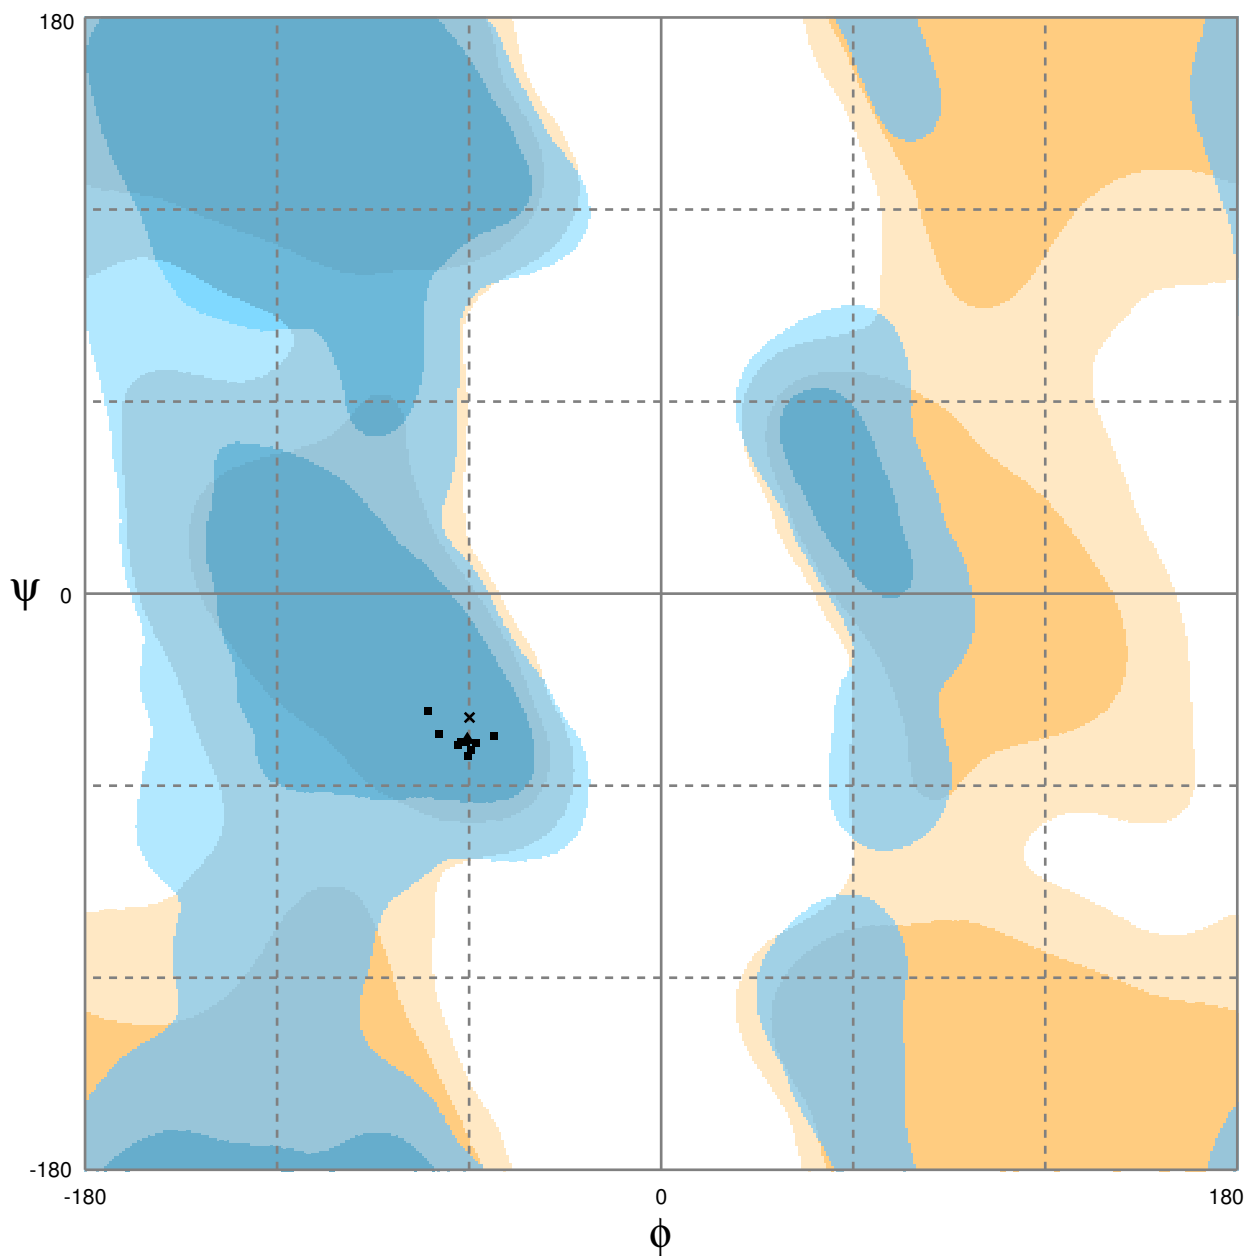

Number of residues in favoured region (~98.0% expected) : 11 (100.0%)  
Number of residues in allowed region (~2.0% expected) : 0 (0.0%)  
Number of residues in outlier region : 0 (0.0%)

RAMPAGE by Paul de Bakker and Simon Lovell available at <http://www-cryst.bioc.cam.ac.uk/rampage/>

Please cite: S.C. Lovell, I.W. Davis, W.B. Arendall III, P.I.W. de Bakker, J.M. Word, M.G. Prisant, J.S. Richardson & D.C. Richardson (2002) Structure validation by  $C\alpha$  geometry:  $\phi/\psi$  and  $C\beta$  deviation. *Proteins: Structure, Function & Genetics*. **50**: 437-450

# Tem\_1cc

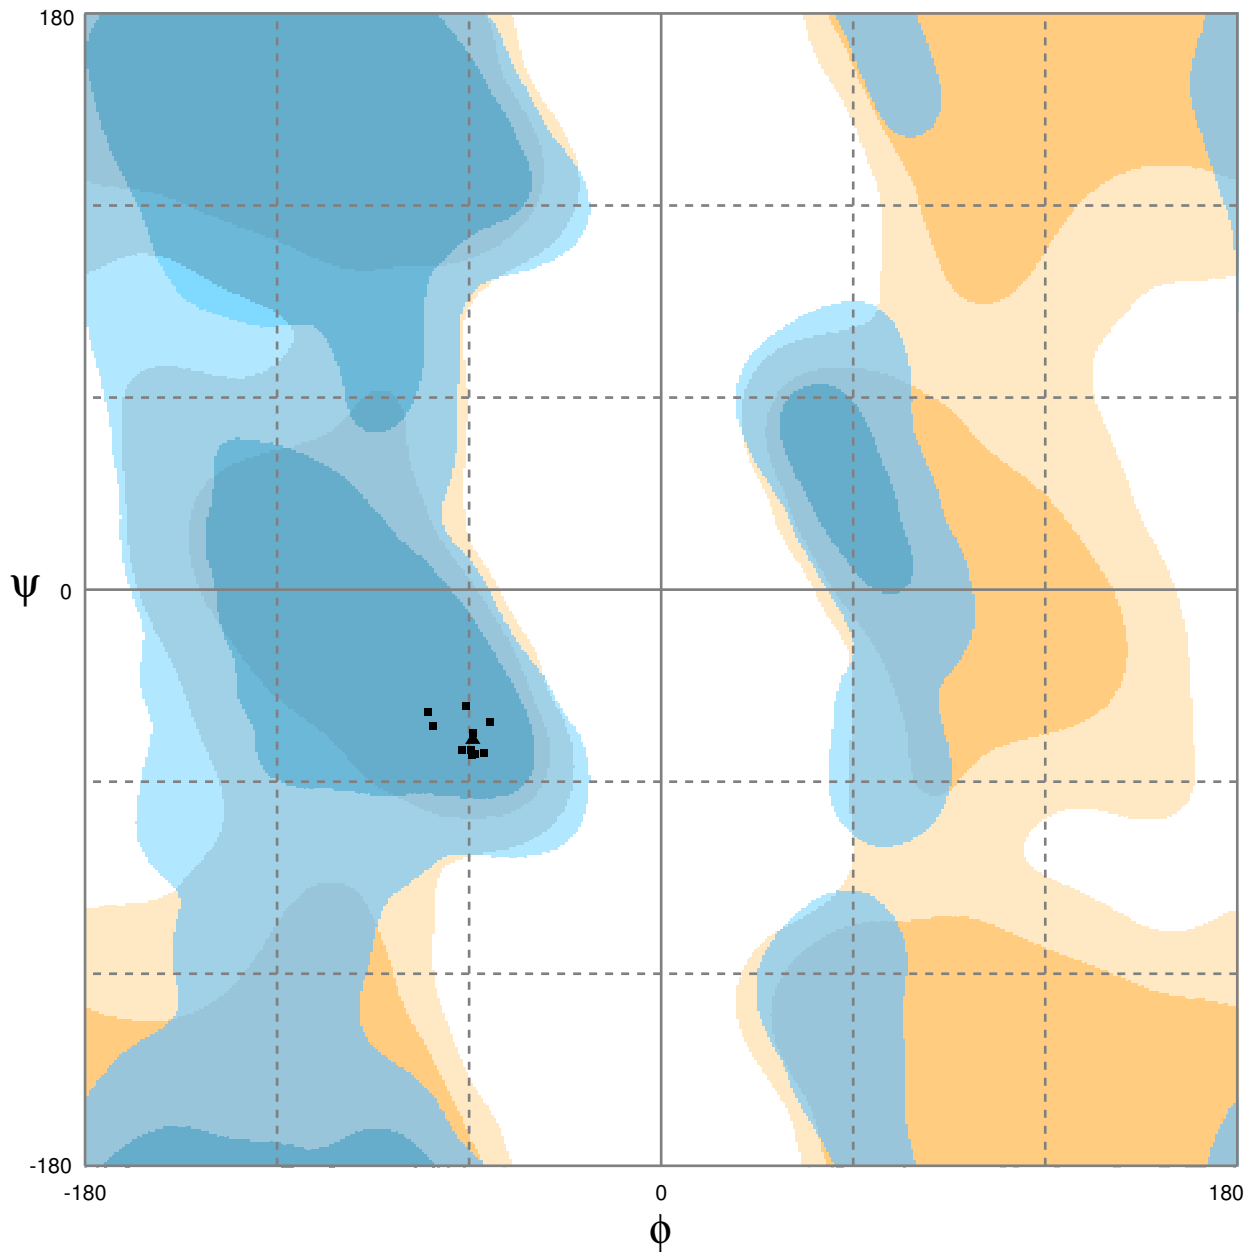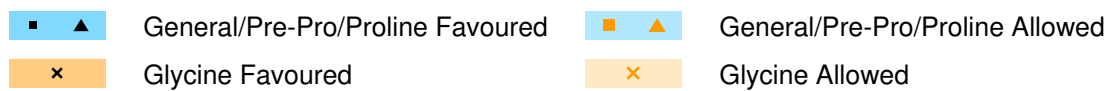

|                                                         |               |
|---------------------------------------------------------|---------------|
| Number of residues in favoured region (~98.0% expected) | : 11 (100.0%) |
| Number of residues in allowed region (~2.0% expected)   | : 0 (0.0%)    |
| Number of residues in outlier region                    | : 0 (0.0%)    |

RAMPAGE by Paul de Bakker and Simon Lovell available at <http://www-cryst.bioc.cam.ac.uk/rampage/>

Please cite: S.C. Lovell, I.W. Davis, W.B. Arendall III, P.I.W. de Bakker, J.M. Word, M.G. Prisant, J.S. Richardson & D.C. Richardson (2002) Structure validation by  $C\alpha$  geometry:  $\phi/\psi$  and  $C\beta$  deviation. *Proteins: Structure, Function & Genetics*. **50**: 437-450

# Tem\_1cd

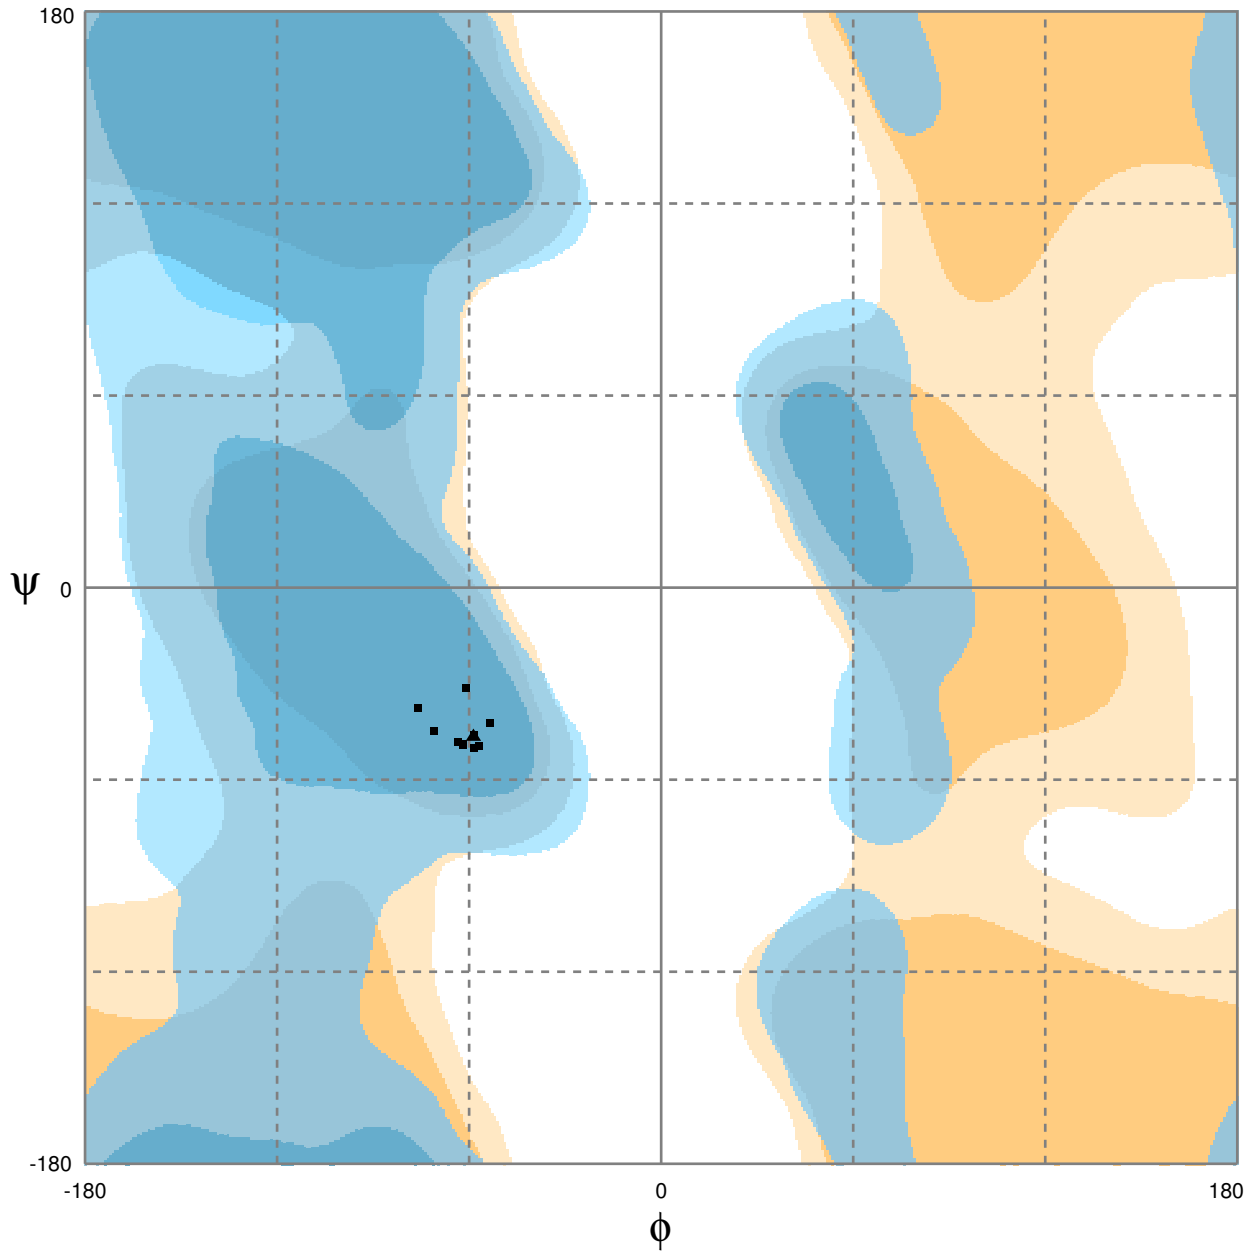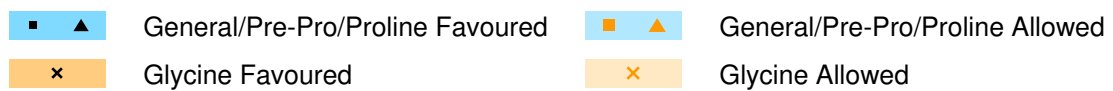

|                                                         |               |
|---------------------------------------------------------|---------------|
| Number of residues in favoured region (~98.0% expected) | : 11 (100.0%) |
| Number of residues in allowed region (~2.0% expected)   | : 0 (0.0%)    |
| Number of residues in outlier region                    | : 0 (0.0%)    |

RAMPAGE by Paul de Bakker and Simon Lovell available at <http://www-cryst.bioc.cam.ac.uk/rampage/>

Please cite: S.C. Lovell, I.W. Davis, W.B. Arendall III, P.I.W. de Bakker, J.M. Word, M.G. Prisant, J.S. Richardson & D.C. Richardson (2002) Structure validation by  $C\alpha$  geometry:  $\phi/\psi$  and  $C\beta$  deviation. *Proteins: Structure, Function & Genetics*. **50**: 437-450

# Tem\_1ce

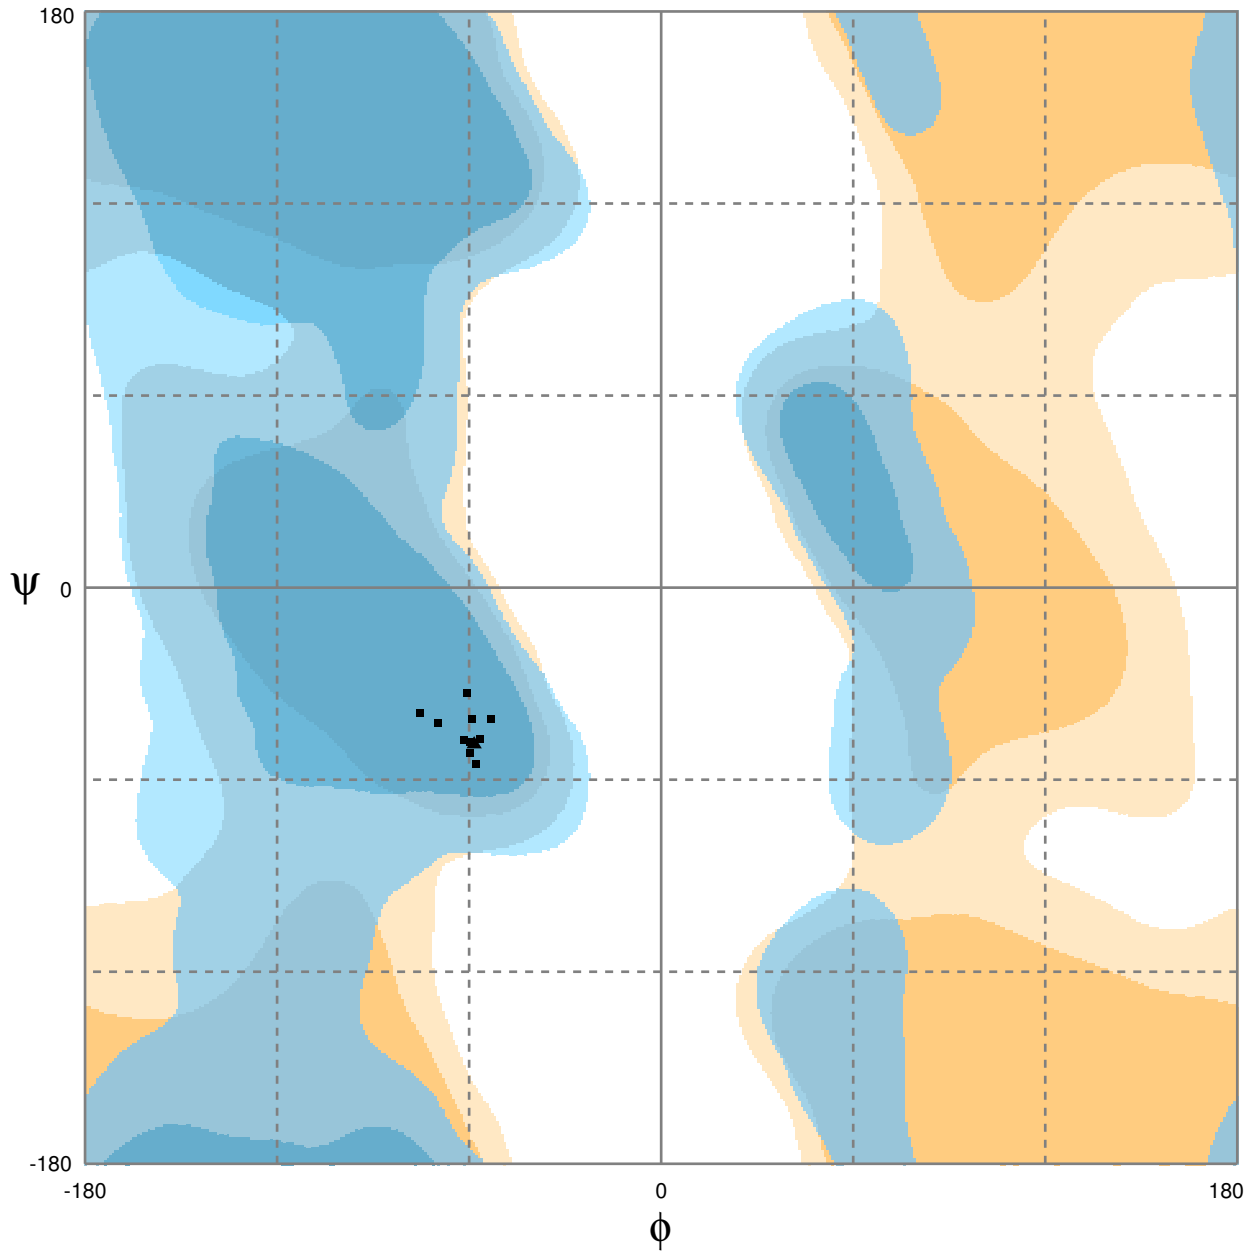

|                                                         |               |
|---------------------------------------------------------|---------------|
| Number of residues in favoured region (~98.0% expected) | : 11 (100.0%) |
| Number of residues in allowed region (~2.0% expected)   | : 0 (0.0%)    |
| Number of residues in outlier region                    | : 0 (0.0%)    |

RAMPAGE by Paul de Bakker and Simon Lovell available at <http://www-cryst.bioc.cam.ac.uk/rampage/>

Please cite: S.C. Lovell, I.W. Davis, W.B. Arendall III, P.I.W. de Bakker, J.M. Word, M.G. Prisant, J.S. Richardson & D.C. Richardson (2002) Structure validation by  $C\alpha$  geometry:  $\phi/\psi$  and  $C\beta$  deviation. *Proteins: Structure, Function & Genetics*. **50**: 437-450



# Tem\_1cea

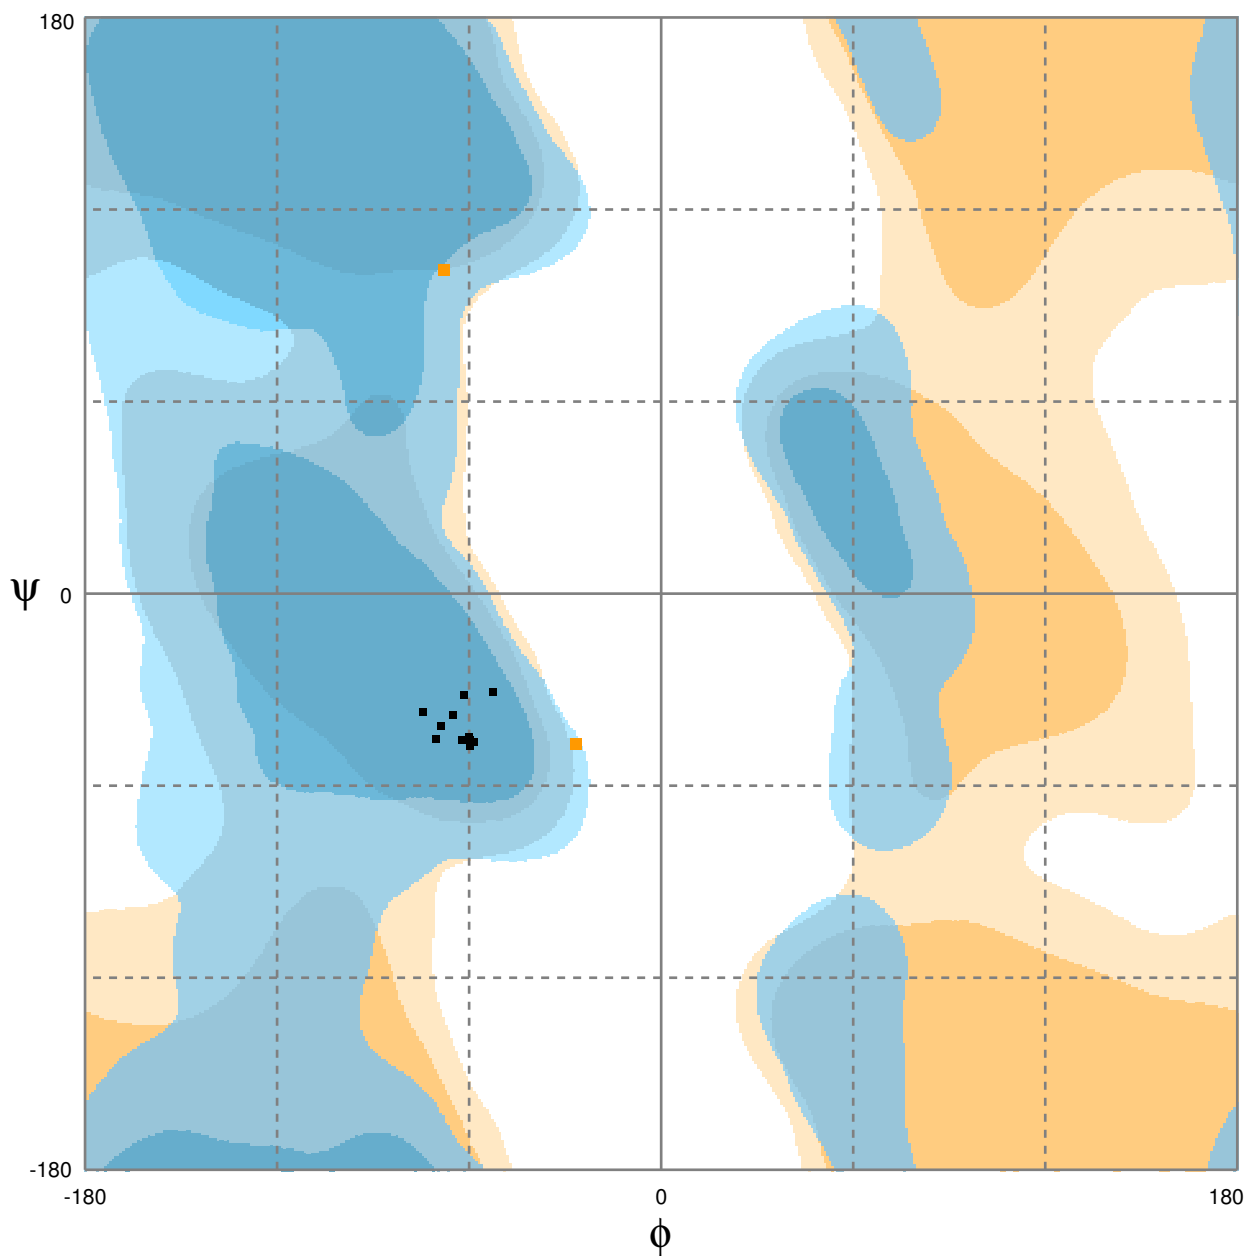

|                                                         |              |
|---------------------------------------------------------|--------------|
| Number of residues in favoured region (~98.0% expected) | : 11 (84.6%) |
| Number of residues in allowed region (~2.0% expected)   | : 2 (15.4%)  |
| Number of residues in outlier region                    | : 0 (0.0%)   |

RAMPAGE by Paul de Bakker and Simon Lovell available at <http://www-cryst.bioc.cam.ac.uk/rampage/>

Please cite: S.C. Lovell, I.W. Davis, W.B. Arendall III, P.I.W. de Bakker, J.M. Word, M.G. Prisant, J.S. Richardson & D.C. Richardson (2002) Structure validation by C $\alpha$  geometry:  $\phi/\psi$  and C $\beta$  deviation. *Proteins: Structure, Function & Genetics*. **50**: 437-450

# Tem\_1ceb

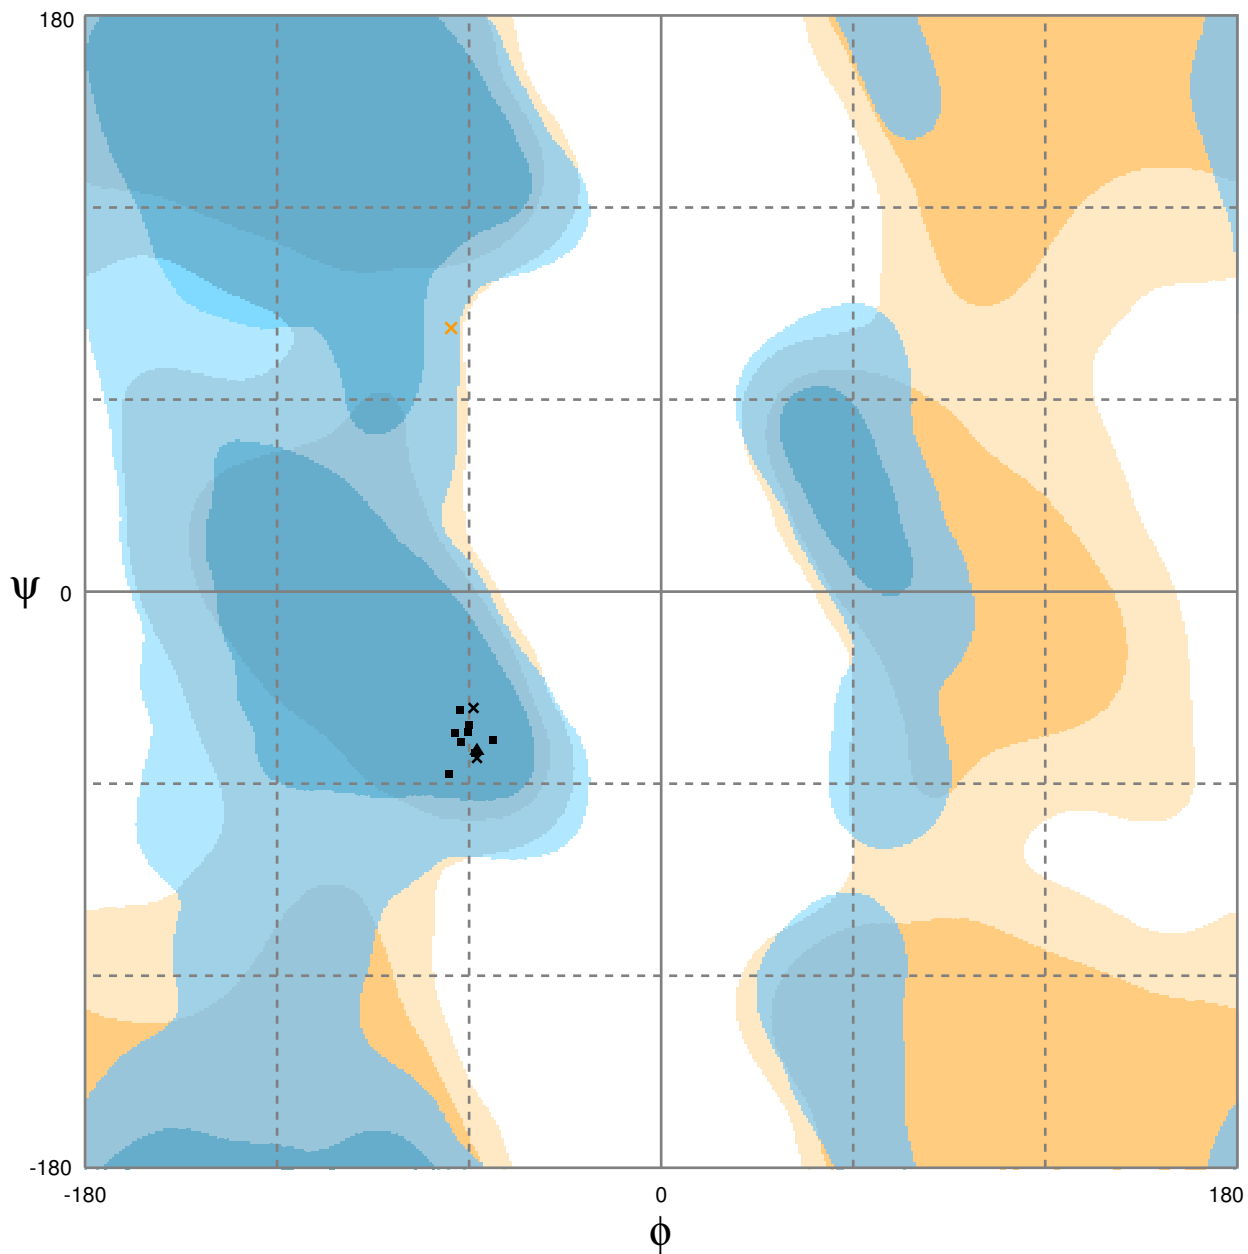

|                                                         |              |
|---------------------------------------------------------|--------------|
| Number of residues in favoured region (~98.0% expected) | : 11 (91.7%) |
| Number of residues in allowed region (~2.0% expected)   | : 1 (8.3%)   |
| Number of residues in outlier region                    | : 0 (0.0%)   |

RAMPAGE by Paul de Bakker and Simon Lovell available at <http://www-cryst.bioc.cam.ac.uk/rampage/>

Please cite: S.C. Lovell, I.W. Davis, W.B. Arendall III, P.I.W. de Bakker, J.M. Word, M.G. Prisant, J.S. Richardson & D.C. Richardson (2002) Structure validation by  $C\alpha$  geometry:  $\phi/\psi$  and  $C\beta$  deviation. *Proteins: Structure, Function & Genetics*. **50**: 437-450

# Tem\_1cec

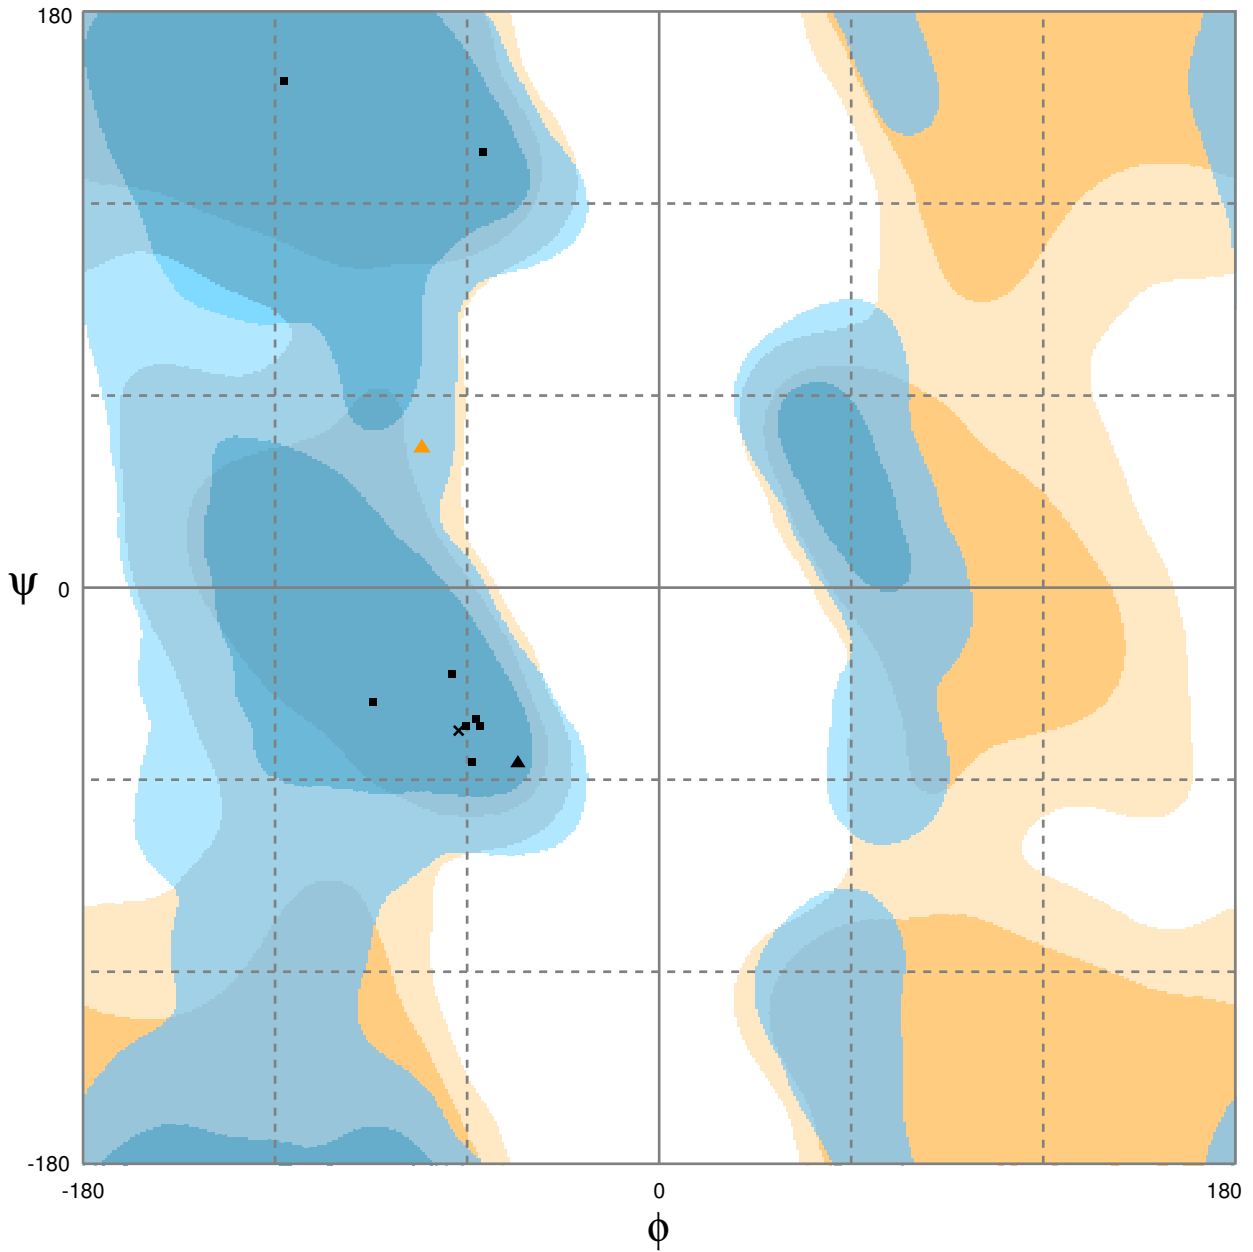

|                                                         |              |
|---------------------------------------------------------|--------------|
| Number of residues in favoured region (~98.0% expected) | : 10 (90.9%) |
| Number of residues in allowed region (~2.0% expected)   | : 1 (9.1%)   |
| Number of residues in outlier region                    | : 0 (0.0%)   |

RAMPAGE by Paul de Bakker and Simon Lovell available at <http://www-cryst.bioc.cam.ac.uk/rampage/>

Please cite: S.C. Lovell, I.W. Davis, W.B. Arendall III, P.I.W. de Bakker, J.M. Word, M.G. Prisant, J.S. Richardson & D.C. Richardson (2002) Structure validation by  $C\alpha$  geometry:  $\phi/\psi$  and  $C\beta$  deviation. *Proteins: Structure, Function & Genetics*. **50**: 437-450

# Tem\_1cee

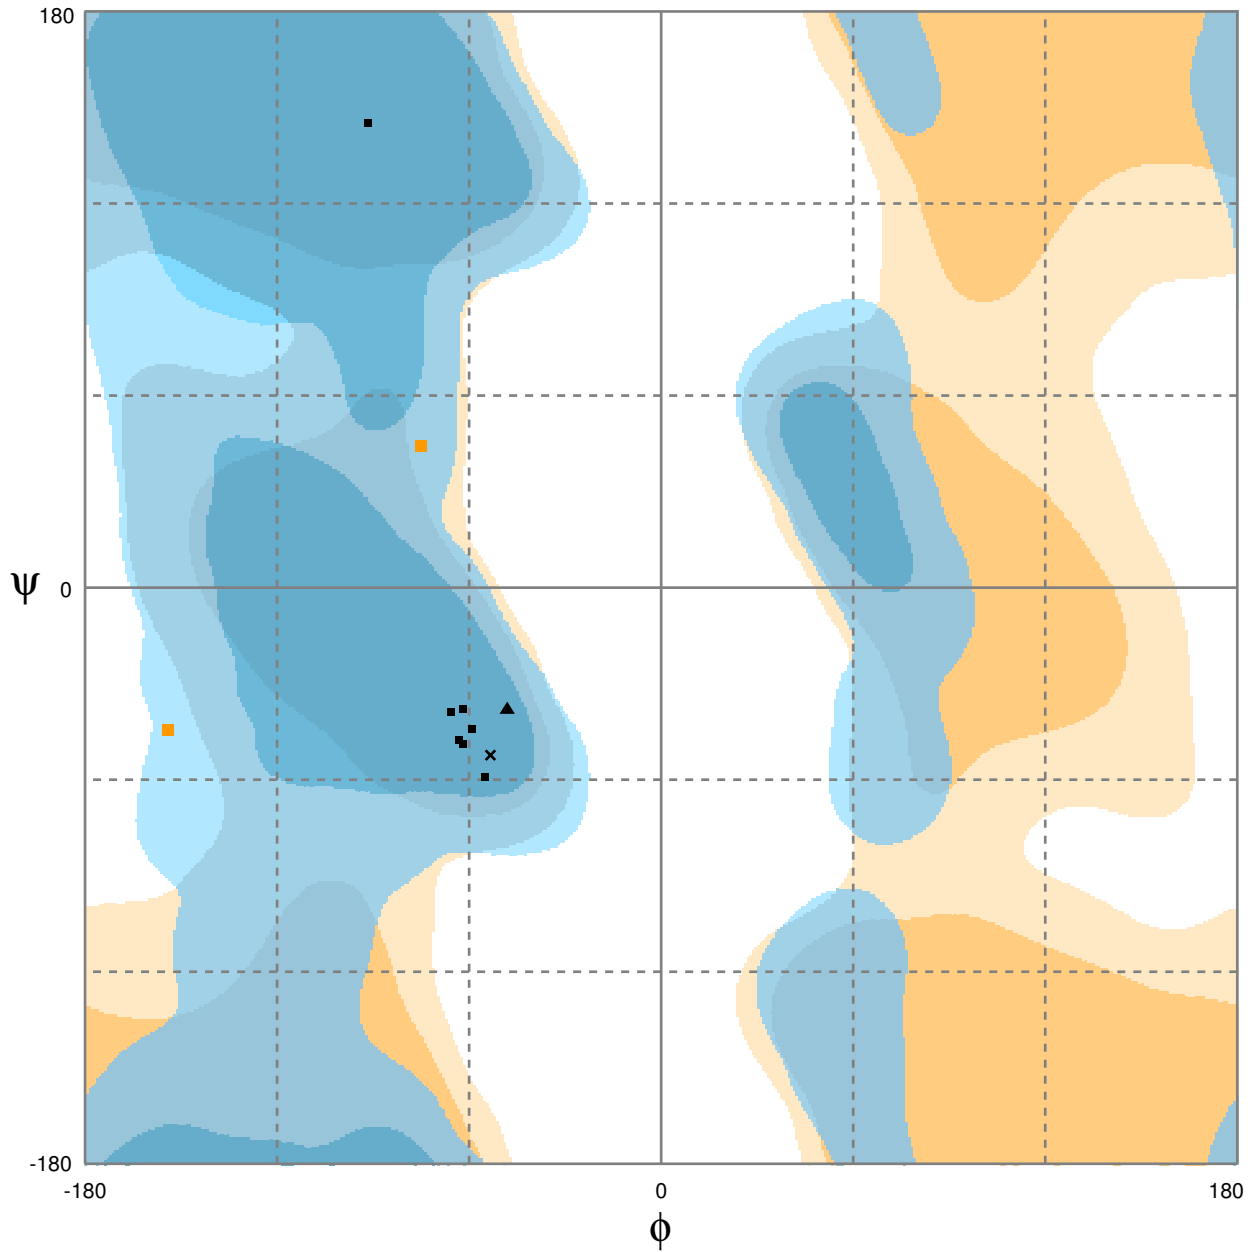

|     |                                  |     |                                 |
|-----|----------------------------------|-----|---------------------------------|
| ■ ▲ | General/Pre-Pro/Proline Favoured | ■ ▲ | General/Pre-Pro/Proline Allowed |
| ×   | Glycine Favoured                 | ×   | Glycine Allowed                 |

|                                                         |             |
|---------------------------------------------------------|-------------|
| Number of residues in favoured region (~98.0% expected) | : 9 (81.8%) |
| Number of residues in allowed region (~2.0% expected)   | : 2 (18.2%) |
| Number of residues in outlier region                    | : 0 (0.0%)  |

RAMPAGE by Paul de Bakker and Simon Lovell available at <http://www-cryst.bioc.cam.ac.uk/rampage/>

Please cite: S.C. Lovell, I.W. Davis, W.B. Arendall III, P.I.W. de Bakker, J.M. Word, M.G. Prisant, J.S. Richardson & D.C. Richardson (2002) Structure validation by  $C\alpha$  geometry:  $\phi/\psi$  and  $C\beta$  deviation. *Proteins: Structure, Function & Genetics*. **50**: 437-450

# Tem\_1csb

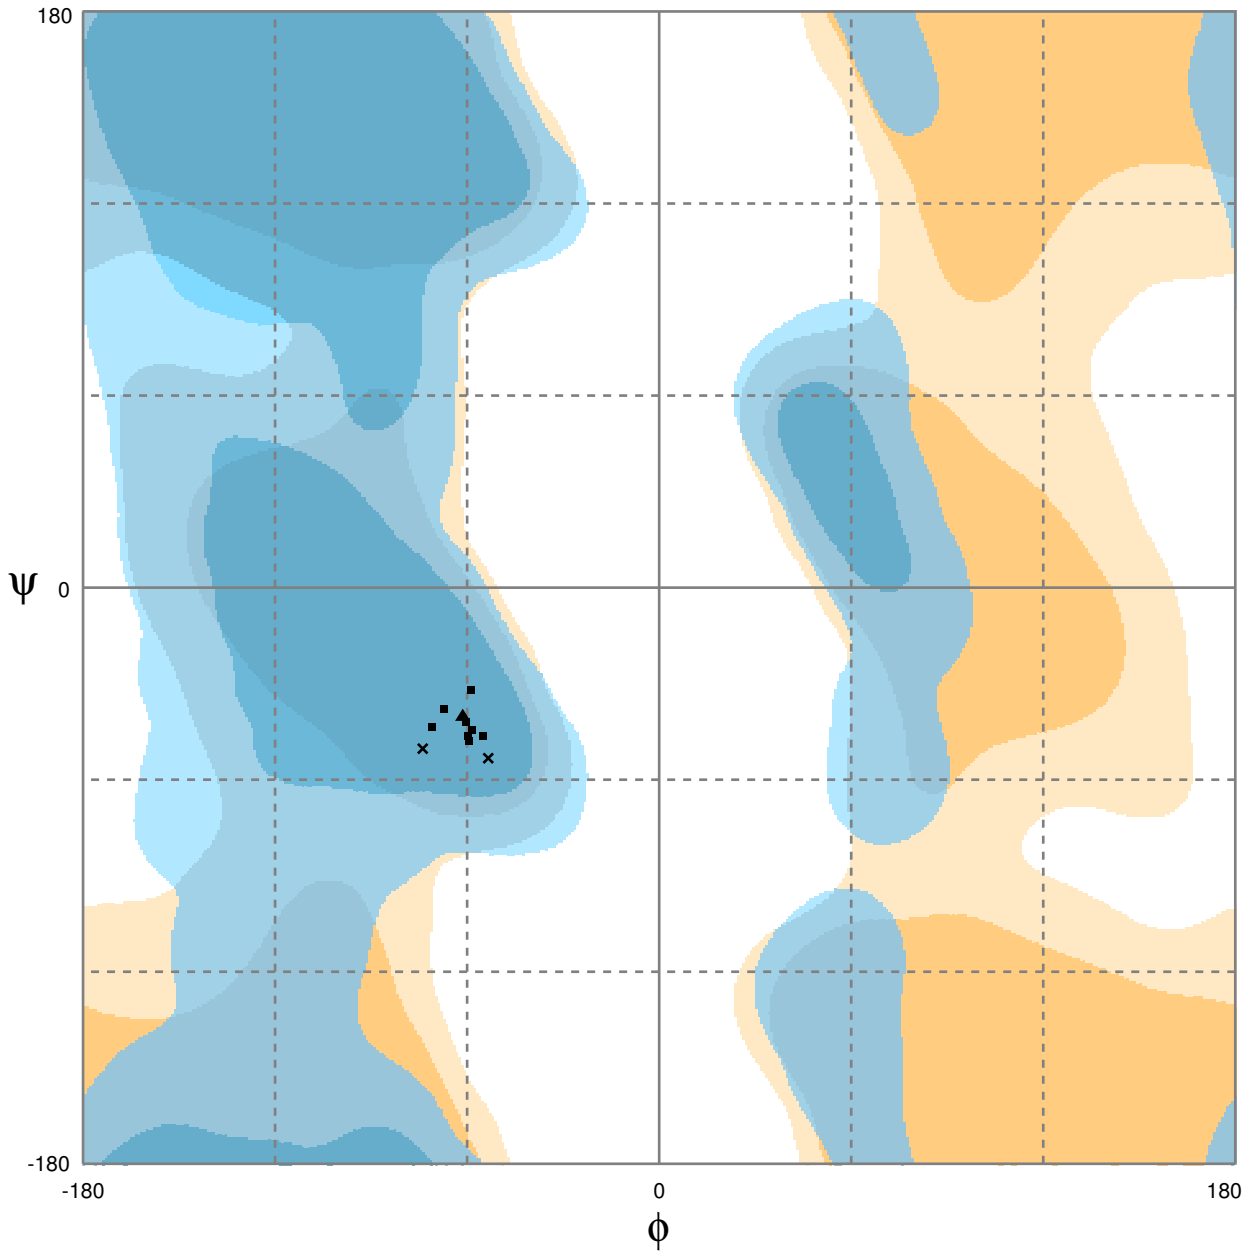

|                                                         |               |
|---------------------------------------------------------|---------------|
| Number of residues in favoured region (~98.0% expected) | : 11 (100.0%) |
| Number of residues in allowed region (~2.0% expected)   | : 0 (0.0%)    |
| Number of residues in outlier region                    | : 0 (0.0%)    |

RAMPAGE by Paul de Bakker and Simon Lovell available at <http://www-cryst.bioc.cam.ac.uk/rampage/>

Please cite: S.C. Lovell, I.W. Davis, W.B. Arendall III, P.I.W. de Bakker, J.M. Word, M.G. Prisant, J.S. Richardson & D.C. Richardson (2002) Structure validation by  $C\alpha$  geometry:  $\phi/\psi$  and  $C\beta$  deviation. *Proteins: Structure, Function & Genetics*. **50**: 437-450

# Tem\_1csc

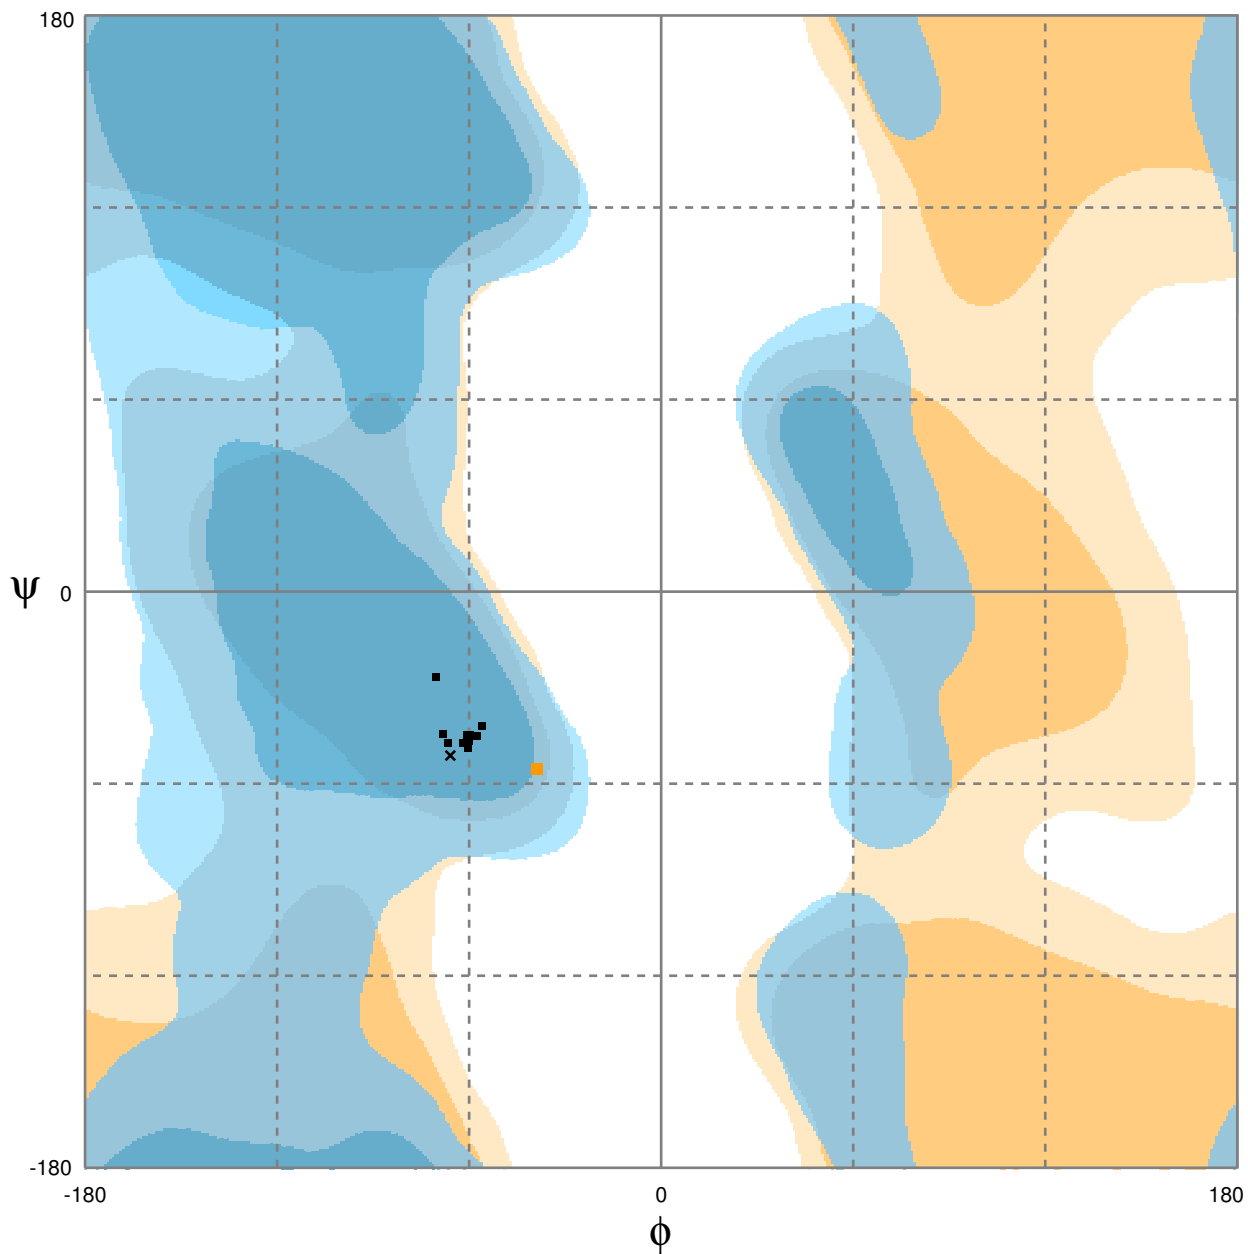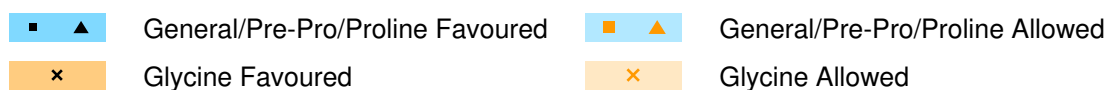

Number of residues in favoured region (~98.0% expected) : 11 (91.7%)  
Number of residues in allowed region (~2.0% expected) : 1 (8.3%)  
Number of residues in outlier region : 0 (0.0%)

RAMPAGE by Paul de Bakker and Simon Lovell available at <http://www-cryst.bioc.cam.ac.uk/rampage/>

Please cite: S.C. Lovell, I.W. Davis, W.B. Arendall III, P.I.W. de Bakker, J.M. Word, M.G. Prisant, J.S. Richardson & D.C. Richardson (2002) Structure validation by  $C\alpha$  geometry:  $\phi/\psi$  and  $C\beta$  deviation. *Proteins: Structure, Function & Genetics*. **50**: 437-450

# Tem\_1csd

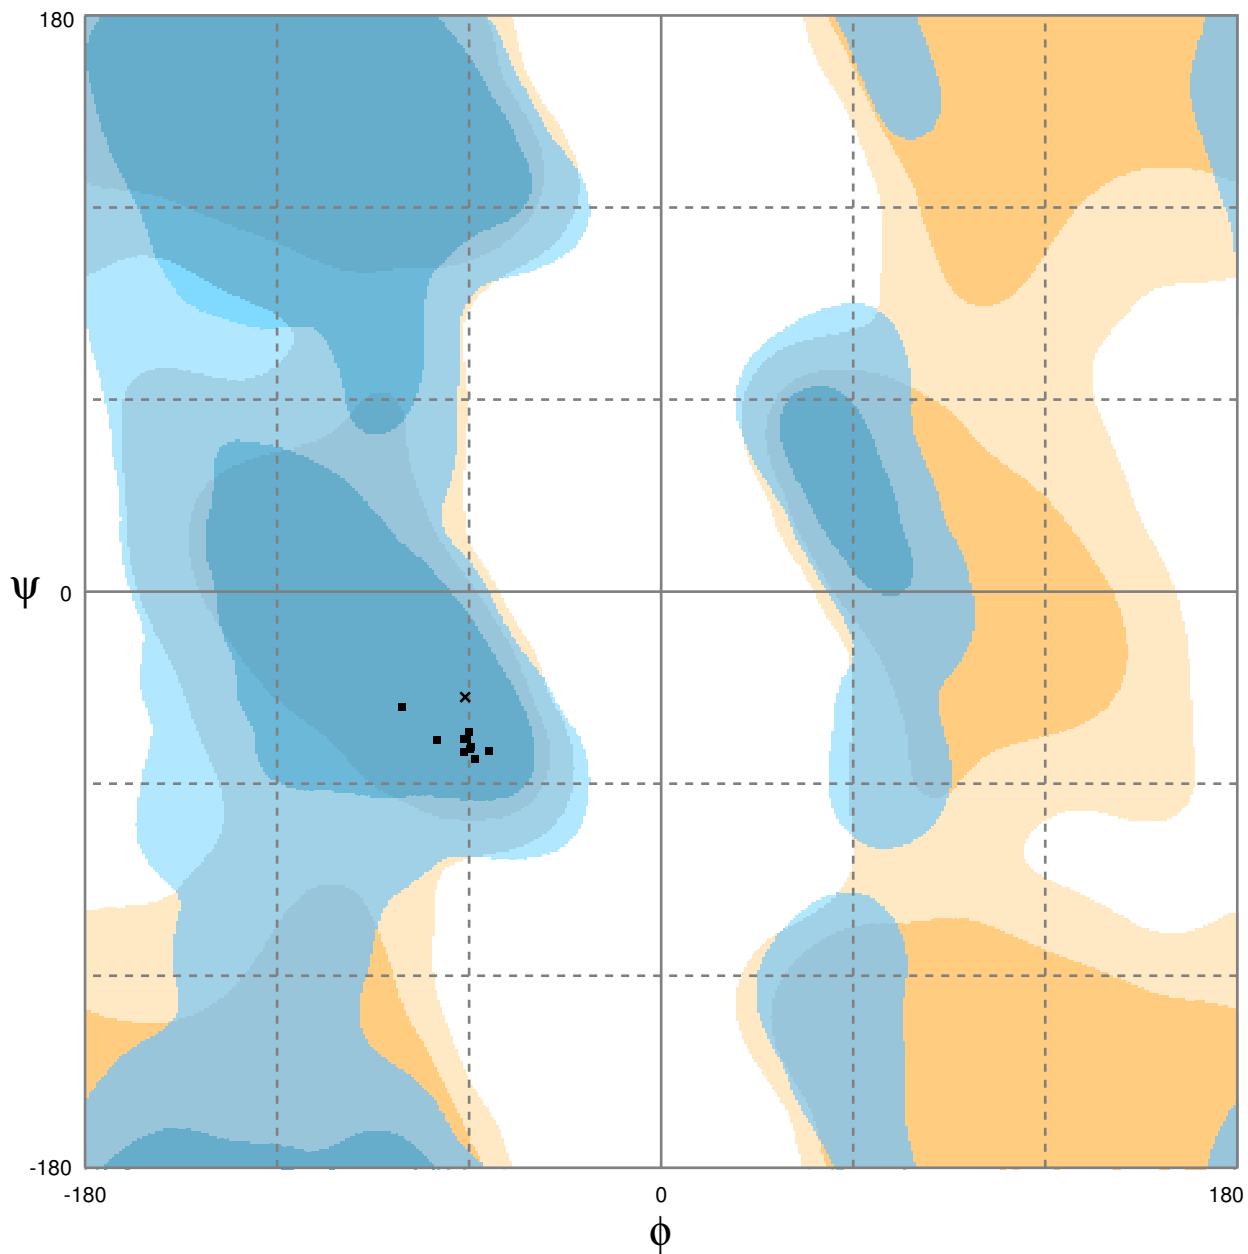

|     |                                  |     |                                 |
|-----|----------------------------------|-----|---------------------------------|
| ■ ▲ | General/Pre-Pro/Proline Favoured | ■ ▲ | General/Pre-Pro/Proline Allowed |
| ■ × | Glycine Favoured                 | ■ × | Glycine Allowed                 |

|                                                         |               |
|---------------------------------------------------------|---------------|
| Number of residues in favoured region (~98.0% expected) | : 11 (100.0%) |
| Number of residues in allowed region (~2.0% expected)   | : 0 (0.0%)    |
| Number of residues in outlier region                    | : 0 (0.0%)    |

RAMPAGE by Paul de Bakker and Simon Lovell available at <http://www-cryst.bioc.cam.ac.uk/rampage/>

Please cite: S.C. Lovell, I.W. Davis, W.B. Arendall III, P.I.W. de Bakker, J.M. Word, M.G. Prisant, J.S. Richardson & D.C. Richardson (2002) Structure validation by  $C\alpha$  geometry:  $\phi/\psi$  and  $C\beta$  deviation. *Proteins: Structure, Function & Genetics*. **50**: 437-450

# Tem\_1dra

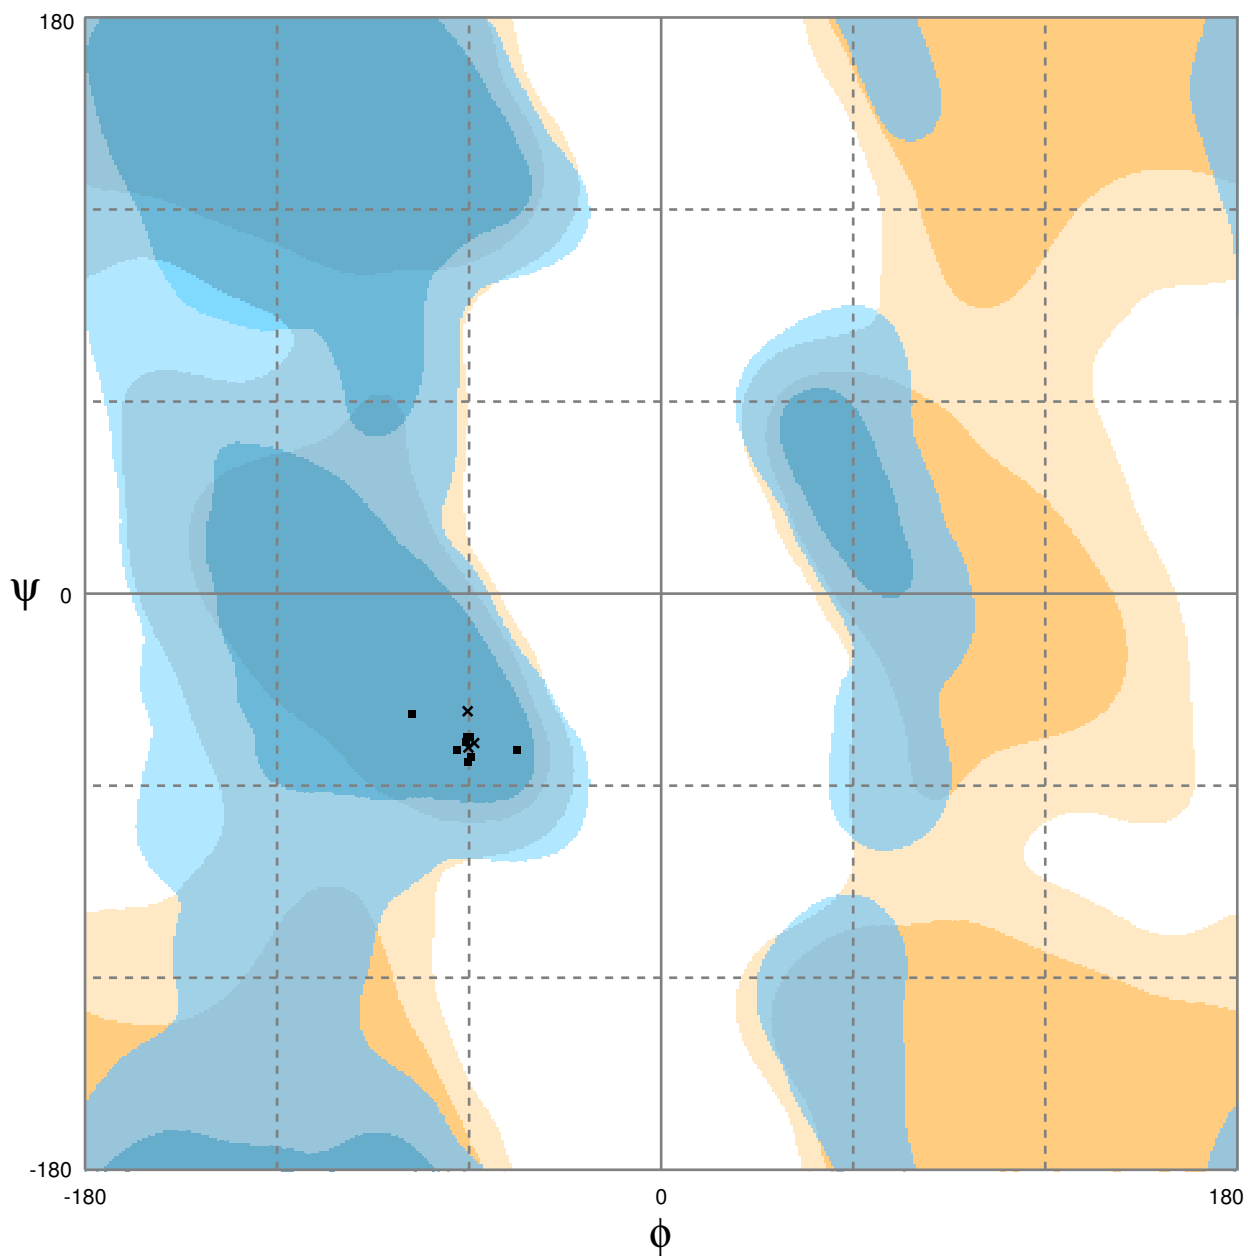

|                                                         |               |
|---------------------------------------------------------|---------------|
| Number of residues in favoured region (~98.0% expected) | : 11 (100.0%) |
| Number of residues in allowed region (~2.0% expected)   | : 0 (0.0%)    |
| Number of residues in outlier region                    | : 0 (0.0%)    |

RAMPAGE by Paul de Bakker and Simon Lovell available at <http://www-cryst.bioc.cam.ac.uk/rampage/>

Please cite: S.C. Lovell, I.W. Davis, W.B. Arendall III, P.I.W. de Bakker, J.M. Word, M.G. Prisant, J.S. Richardson & D.C. Richardson (2002) Structure validation by  $C\alpha$  geometry:  $\phi/\psi$  and  $C\beta$  deviation. *Proteins: Structure, Function & Genetics*. **50**: 437-450



# Tem\_1dya

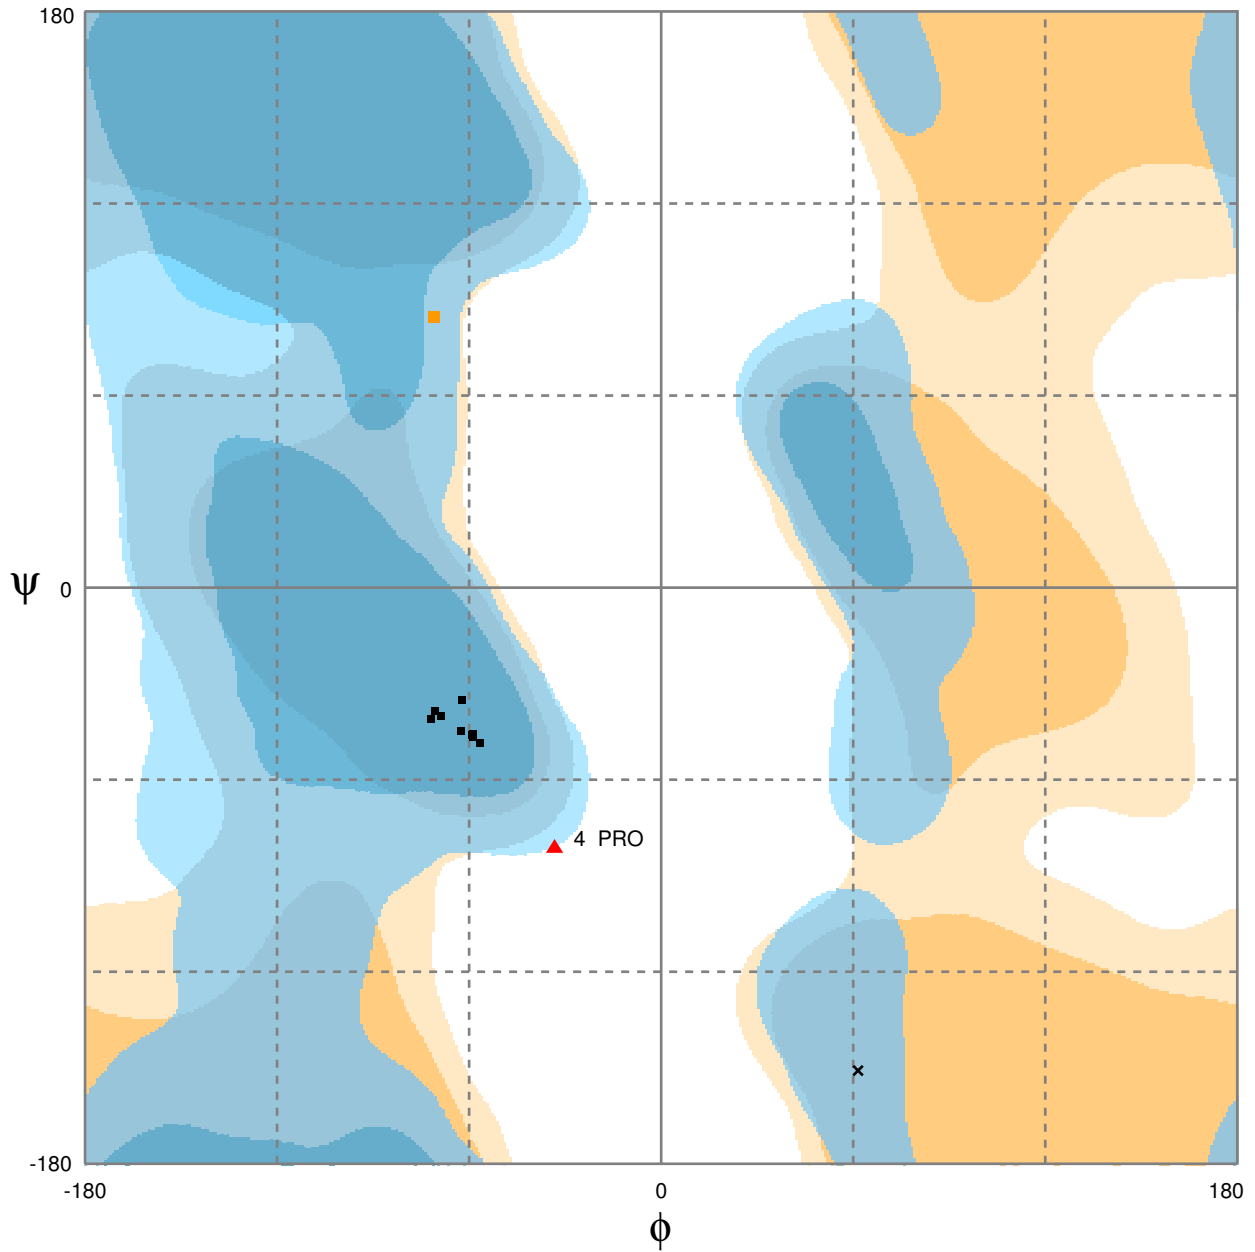

Number of residues in favoured region (~98.0% expected) : 10 (83.3%)  
 Number of residues in allowed region (~2.0% expected) : 1 (8.3%)  
 Number of residues in outlier region : 1 (8.3%)

RAMPAGE by Paul de Bakker and Simon Lovell available at <http://www-cryst.bioc.cam.ac.uk/rampage/>

Please cite: S.C. Lovell, I.W. Davis, W.B. Arendall III, P.I.W. de Bakker, J.M. Word, M.G. Prisant, J.S. Richardson & D.C. Richardson (2002) Structure validation by  $C\alpha$  geometry:  $\phi/\psi$  and  $C\beta$  deviation. *Proteins: Structure, Function & Genetics*. **50**: 437-450

# Tem\_1ec

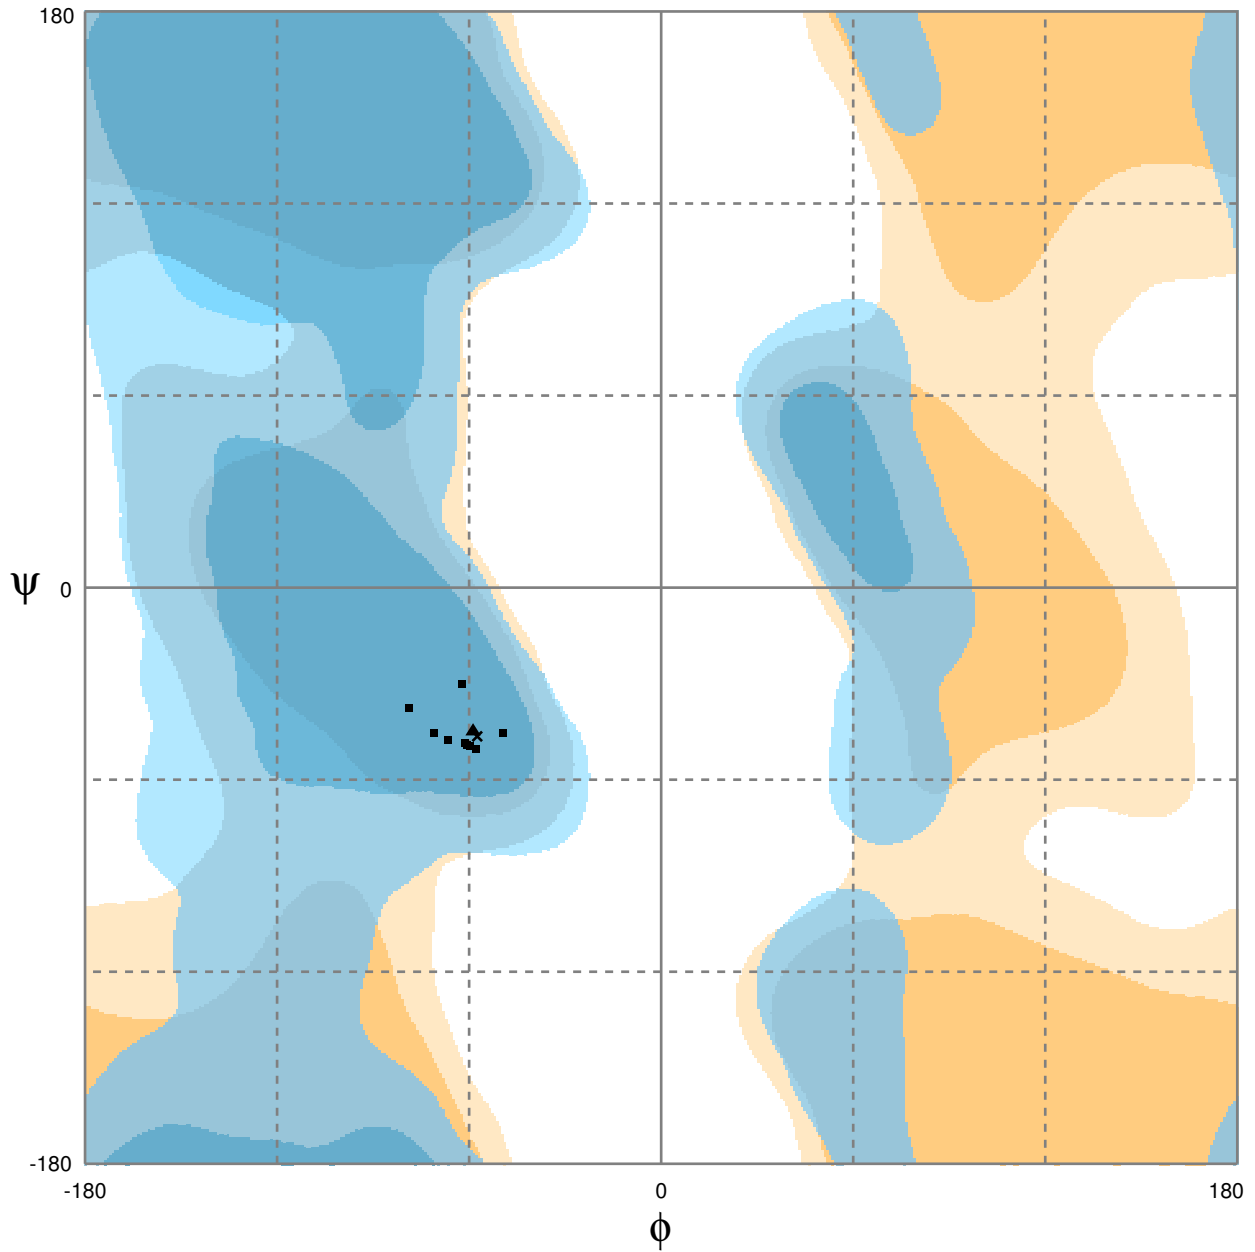

Number of residues in favoured region (~98.0% expected) : 11 (100.0%)  
Number of residues in allowed region (~2.0% expected) : 0 (0.0%)  
Number of residues in outlier region : 0 (0.0%)

RAMPAGE by Paul de Bakker and Simon Lovell available at <http://www-cryst.bioc.cam.ac.uk/rampage/>

Please cite: S.C. Lovell, I.W. Davis, W.B. Arendall III, P.I.W. de Bakker, J.M. Word, M.G. Prisant, J.S. Richardson & D.C. Richardson (2002) Structure validation by  $C\alpha$  geometry:  $\phi/\psi$  and  $C\beta$  deviation. *Proteins: Structure, Function & Genetics*. **50**: 437-450

# Tem\_1ga

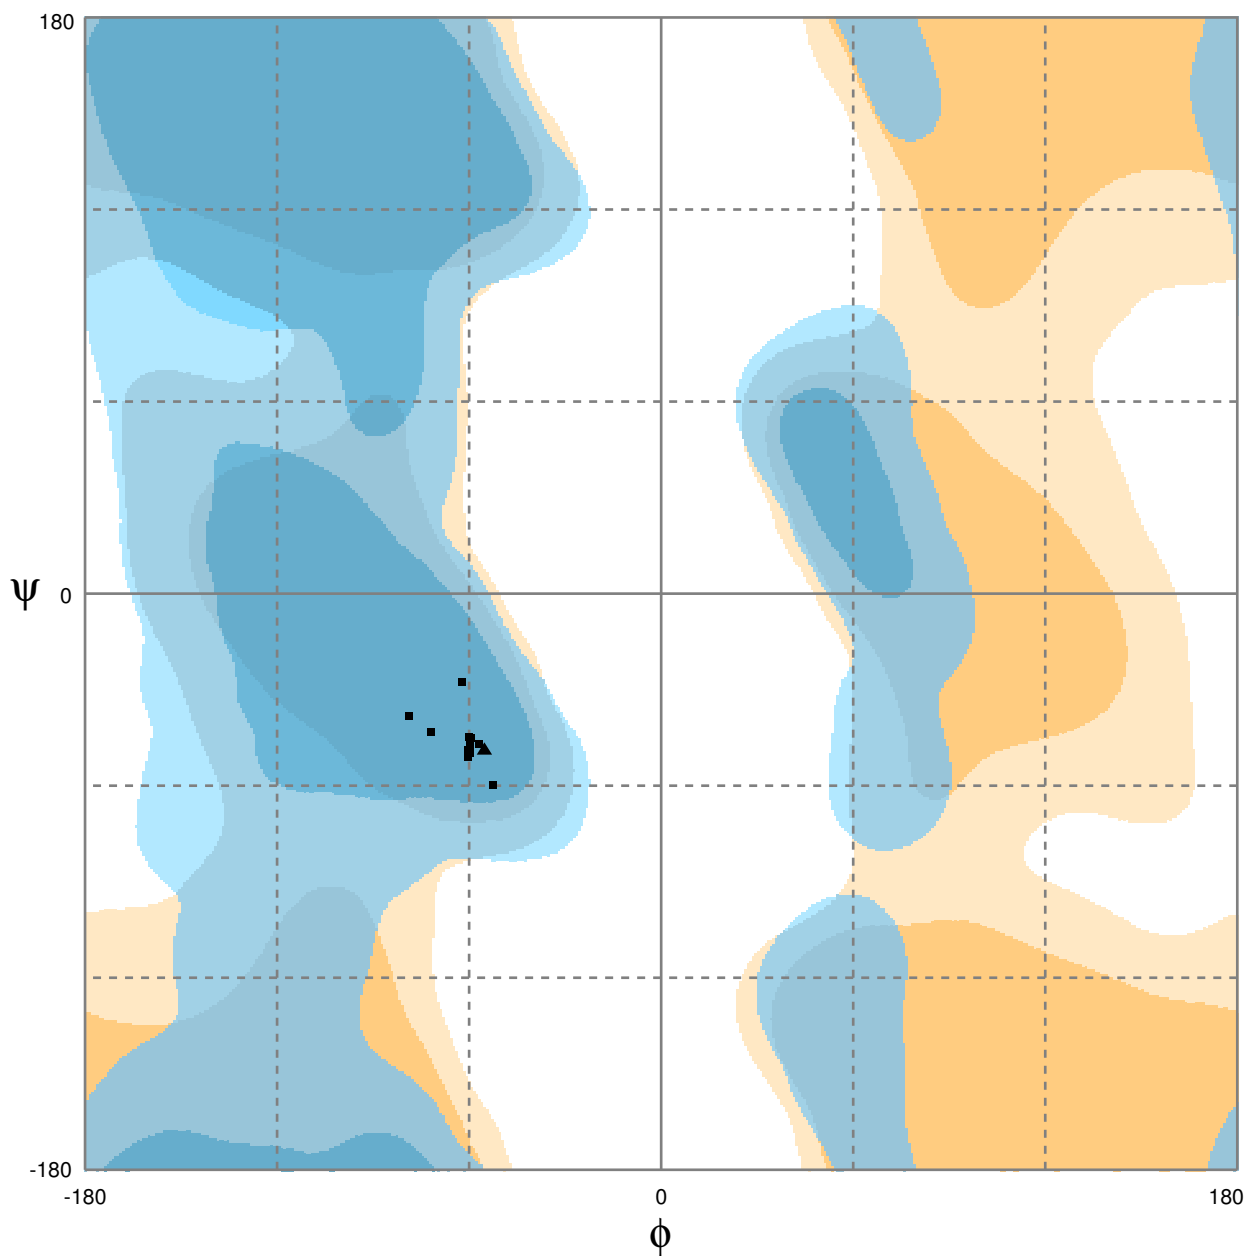

|                                                         |               |
|---------------------------------------------------------|---------------|
| Number of residues in favoured region (~98.0% expected) | : 12 (100.0%) |
| Number of residues in allowed region (~2.0% expected)   | : 0 (0.0%)    |
| Number of residues in outlier region                    | : 0 (0.0%)    |

RAMPAGE by Paul de Bakker and Simon Lovell available at <http://www-cryst.bioc.cam.ac.uk/rampage/>

Please cite: S.C. Lovell, I.W. Davis, W.B. Arendall III, P.I.W. de Bakker, J.M. Word, M.G. Prisant, J.S. Richardson & D.C. Richardson (2002) Structure validation by  $C\alpha$  geometry:  $\phi/\psi$  and  $C\beta$  deviation. *Proteins: Structure, Function & Genetics*. **50**: 437-450

# Tem\_1gb

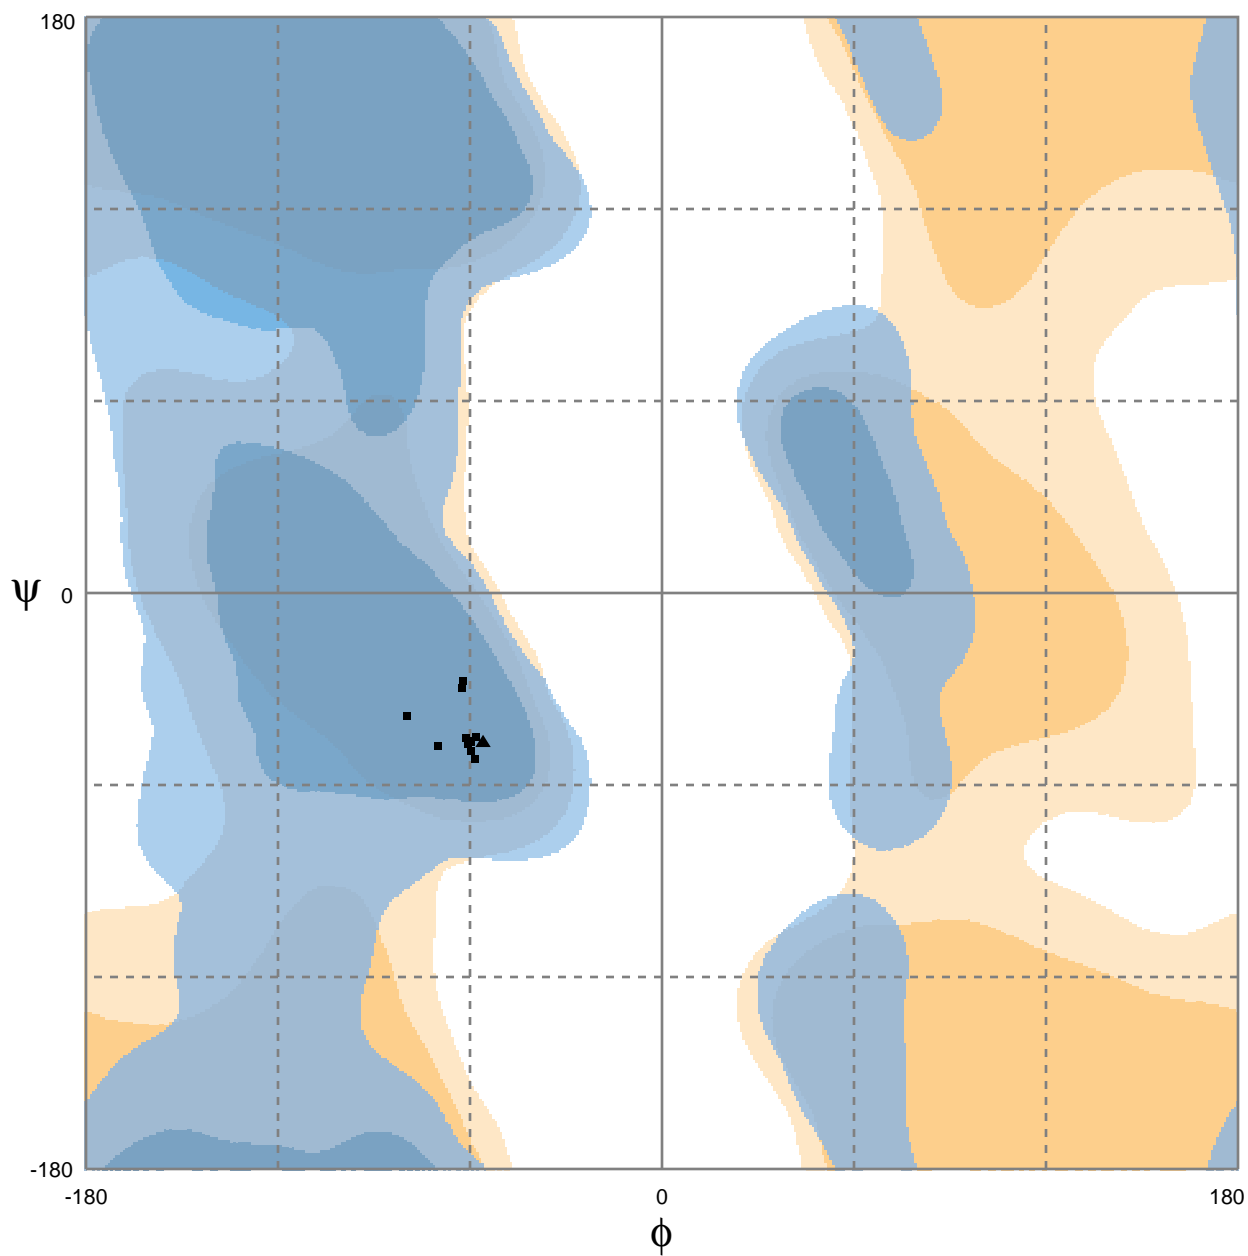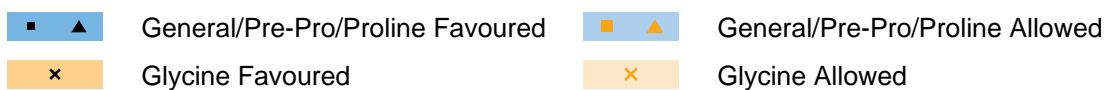

Number of residues in favoured region (~98.0% expected) : 12 (100.0%)  
Number of residues in allowed region (~2.0% expected) : 0 (0.0%)  
Number of residues in outlier region : 0 (0.0%)

RAMPAGE by Paul de Bakker and Simon Lovell available at <http://www-cryst.bioc.cam.ac.uk/rampage/>

Please cite: S.C. Lovell, I.W. Davis, W.B. Arendall III, P.I.W. de Bakker, J.M. Word, M.G. Prisant, J.S. Richardson & D.C. Richardson (2002) Structure validation by C $\alpha$  geometry:  $\phi/\psi$  and C $\beta$  deviation. *Proteins: Structure, Function & Genetics* **50**: 437-450

# Tem\_1gc

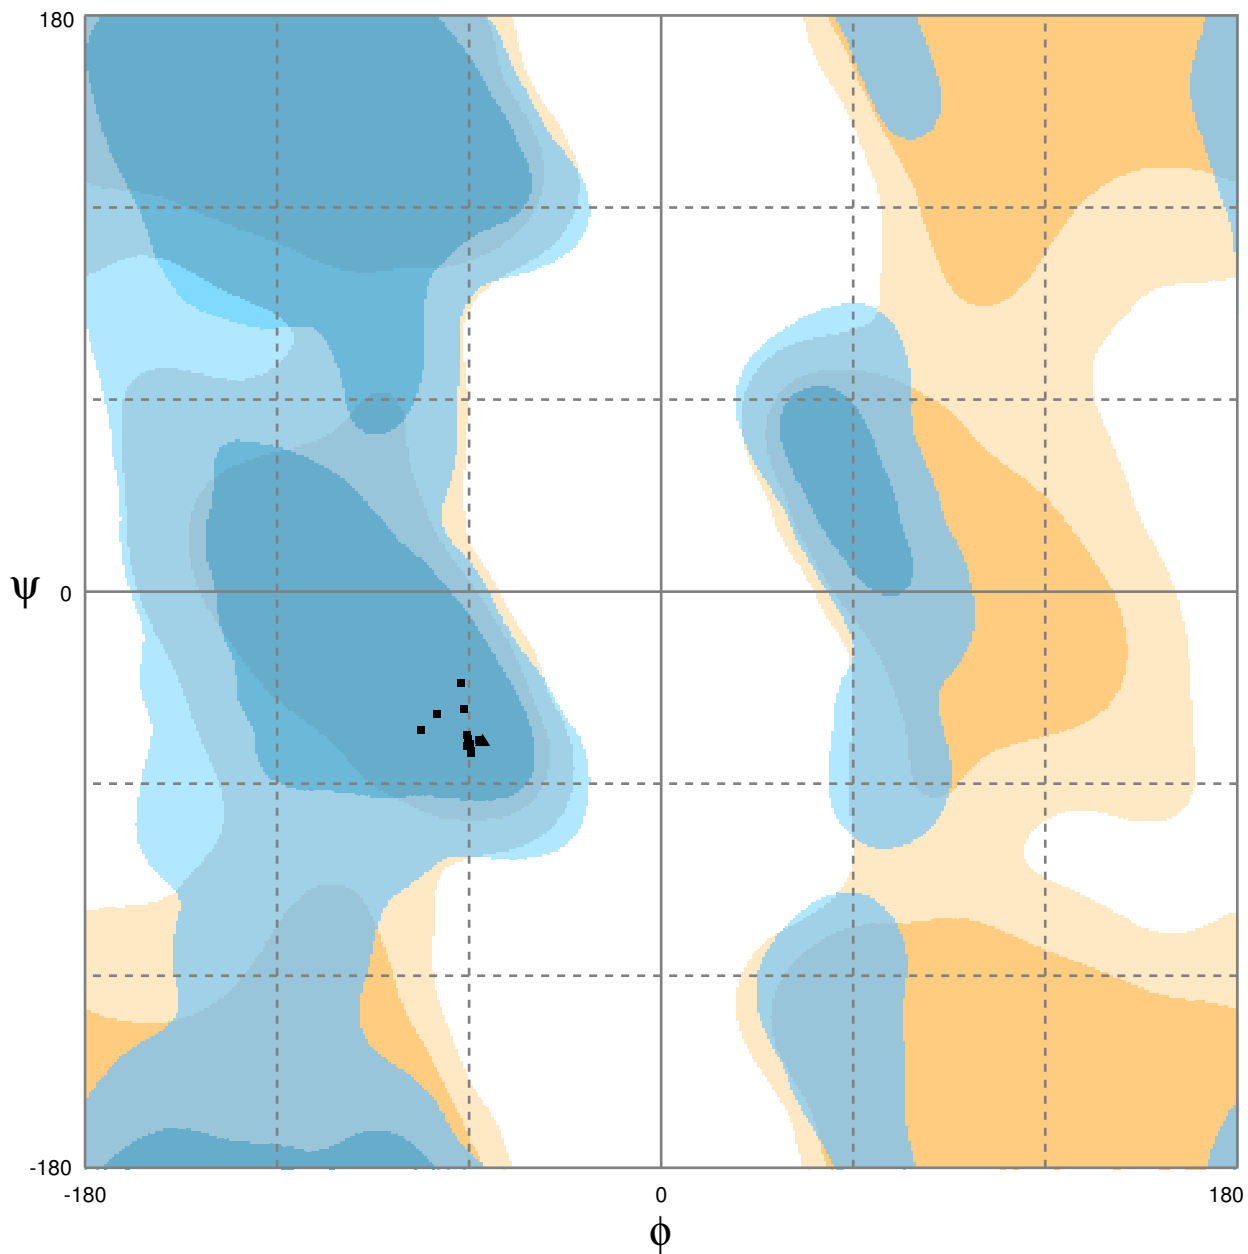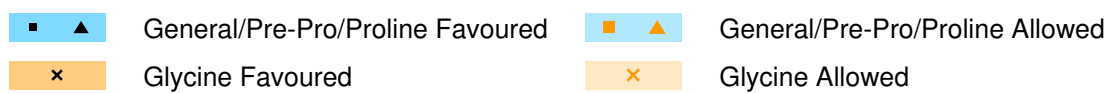

|                                                         |               |
|---------------------------------------------------------|---------------|
| Number of residues in favoured region (~98.0% expected) | : 12 (100.0%) |
| Number of residues in allowed region (~2.0% expected)   | : 0 (0.0%)    |
| Number of residues in outlier region                    | : 0 (0.0%)    |

RAMPAGE by Paul de Bakker and Simon Lovell available at <http://www-cryst.bioc.cam.ac.uk/rampage/>

Please cite: S.C. Lovell, I.W. Davis, W.B. Arendall III, P.I.W. de Bakker, J.M. Word, M.G. Prisant, J.S. Richardson & D.C. Richardson (2002) Structure validation by  $C\alpha$  geometry:  $\phi/\psi$  and  $C\beta$  deviation. *Proteins: Structure, Function & Genetics*. **50**: 437-450

# Tem\_1gd

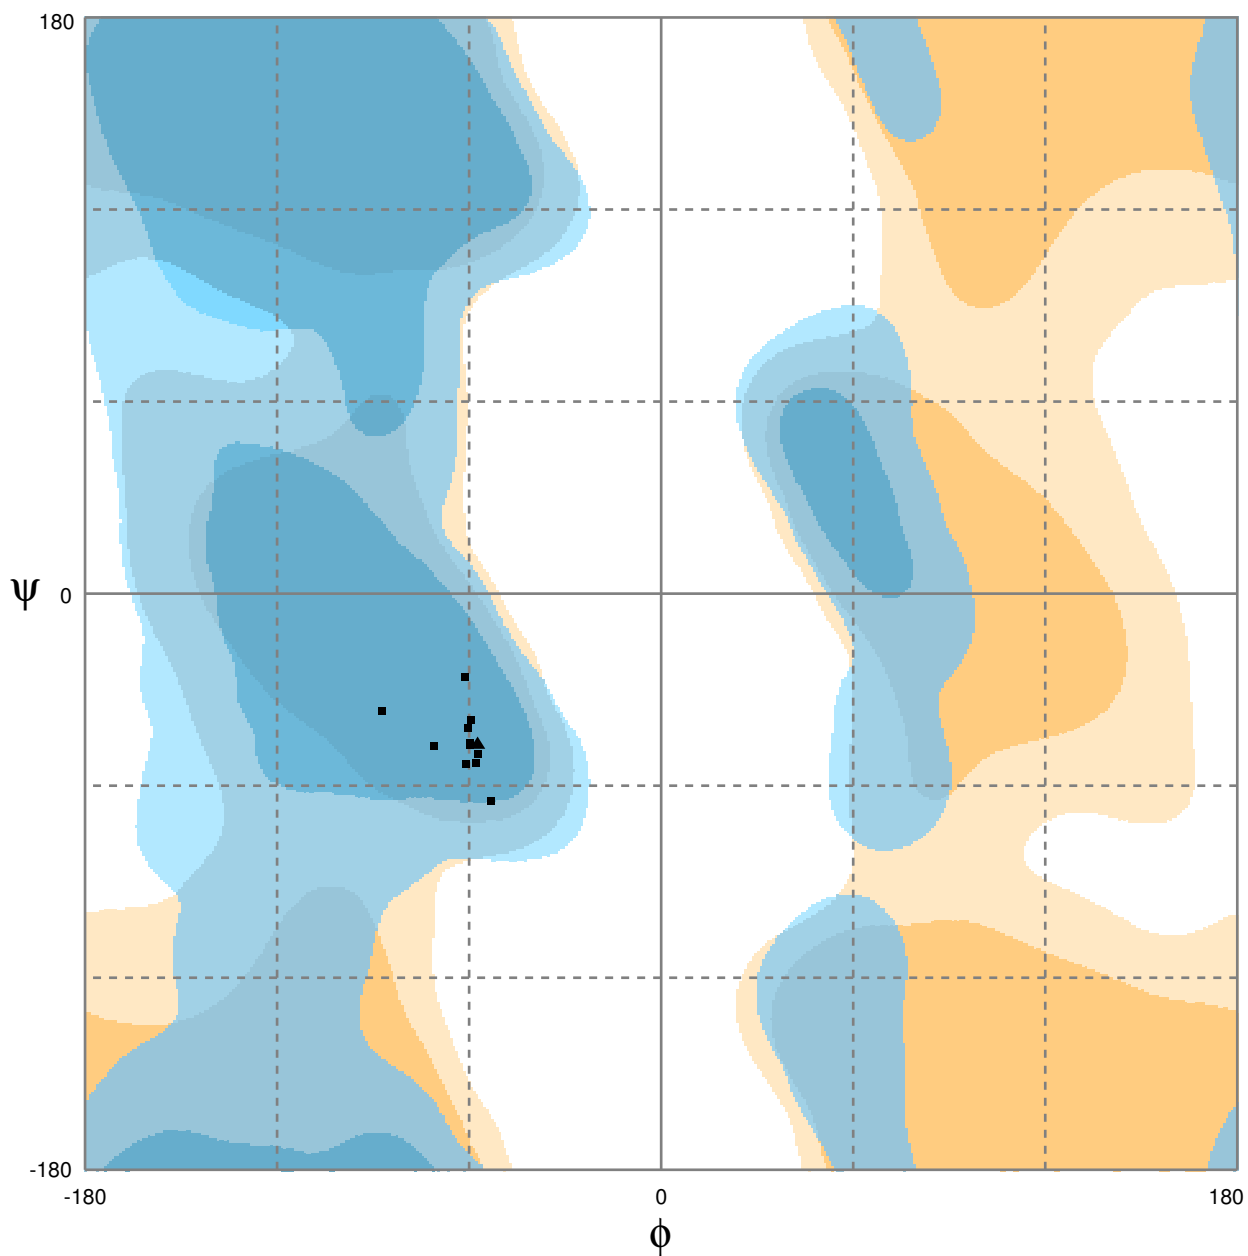

|                                                         |               |
|---------------------------------------------------------|---------------|
| Number of residues in favoured region (~98.0% expected) | : 12 (100.0%) |
| Number of residues in allowed region (~2.0% expected)   | : 0 (0.0%)    |
| Number of residues in outlier region                    | : 0 (0.0%)    |

RAMPAGE by Paul de Bakker and Simon Lovell available at <http://www-cryst.bioc.cam.ac.uk/rampage/>

Please cite: S.C. Lovell, I.W. Davis, W.B. Arendall III, P.I.W. de Bakker, J.M. Word, M.G. Prisant, J.S. Richardson & D.C. Richardson (2002) Structure validation by  $C\alpha$  geometry:  $\phi/\psi$  and  $C\beta$  deviation. *Proteins: Structure, Function & Genetics*. **50**: 437-450

# Tem\_1gy

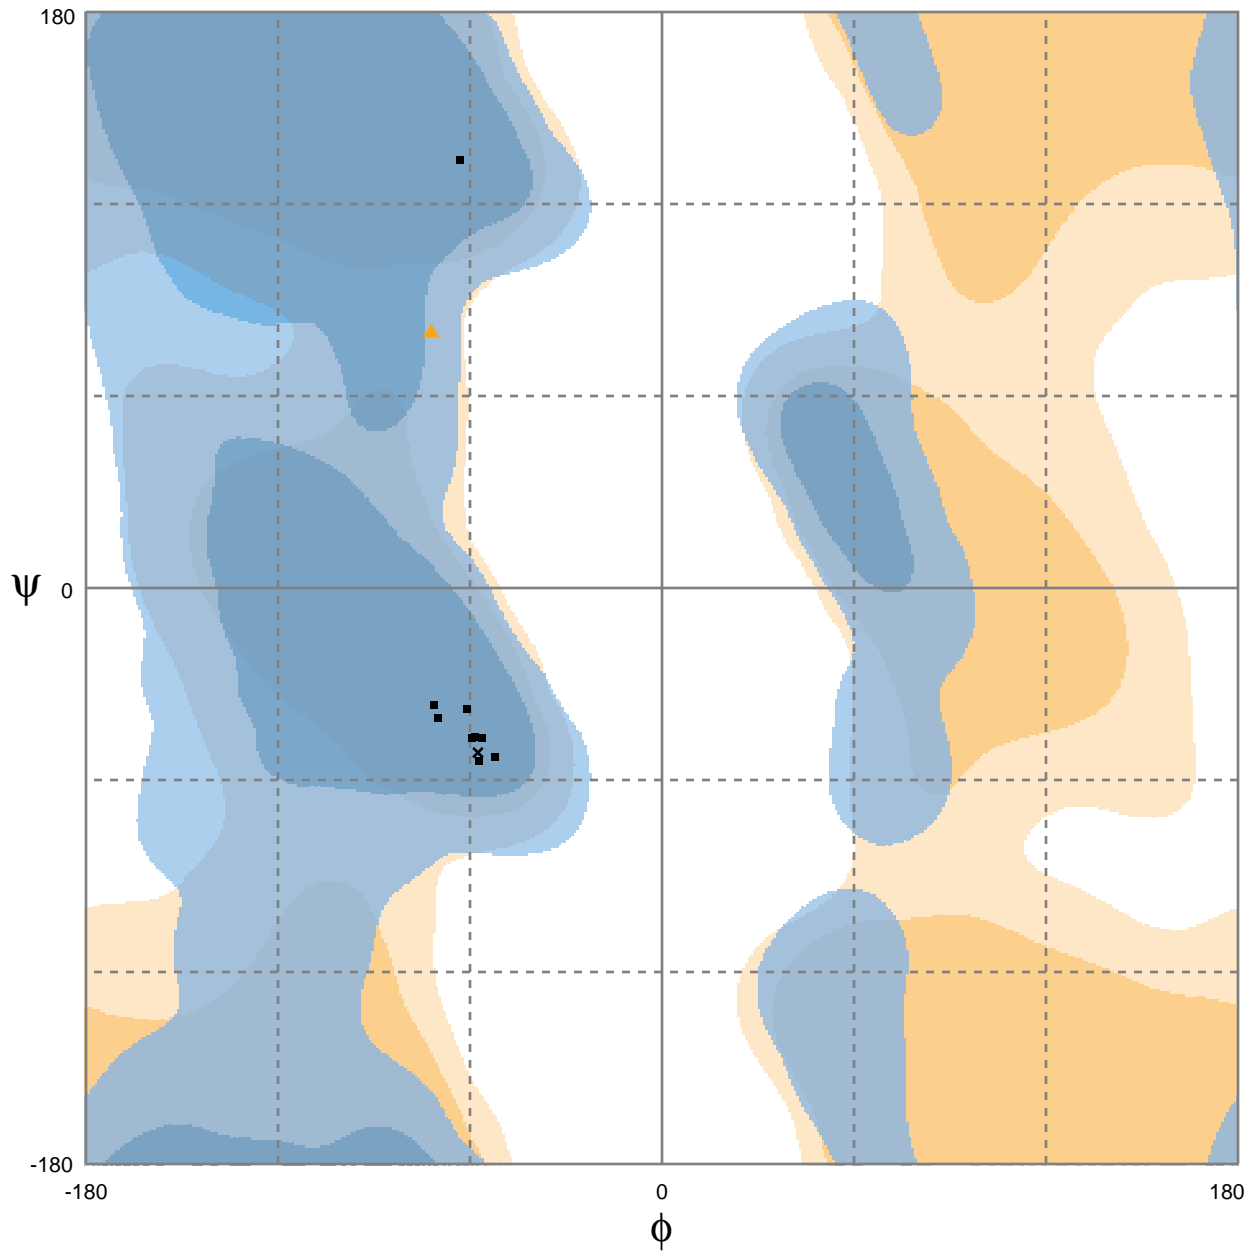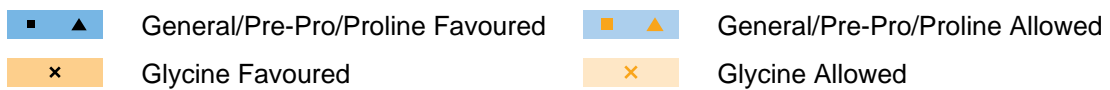

Number of residues in favoured region (~98.0% expected) : 10 (90.9%)  
Number of residues in allowed region (~2.0% expected) : 1 (9.1%)  
Number of residues in outlier region : 0 (0.0%)

RAMPAGE by Paul de Bakker and Simon Lovell available at <http://www-cryst.bioc.cam.ac.uk/rampage/>

Please cite: S.C. Lovell, I.W. Davis, W.B. Arendall III, P.I.W. de Bakker, J.M. Word, M.G. Prisant, J.S. Richardson & D.C. Richardson (2002) Structure validation by C $\alpha$  geometry:  $\phi/\psi$  and C $\beta$  deviation. *Proteins: Structure, Function & Genetics* **50**: 437-450

# Tem\_1hka

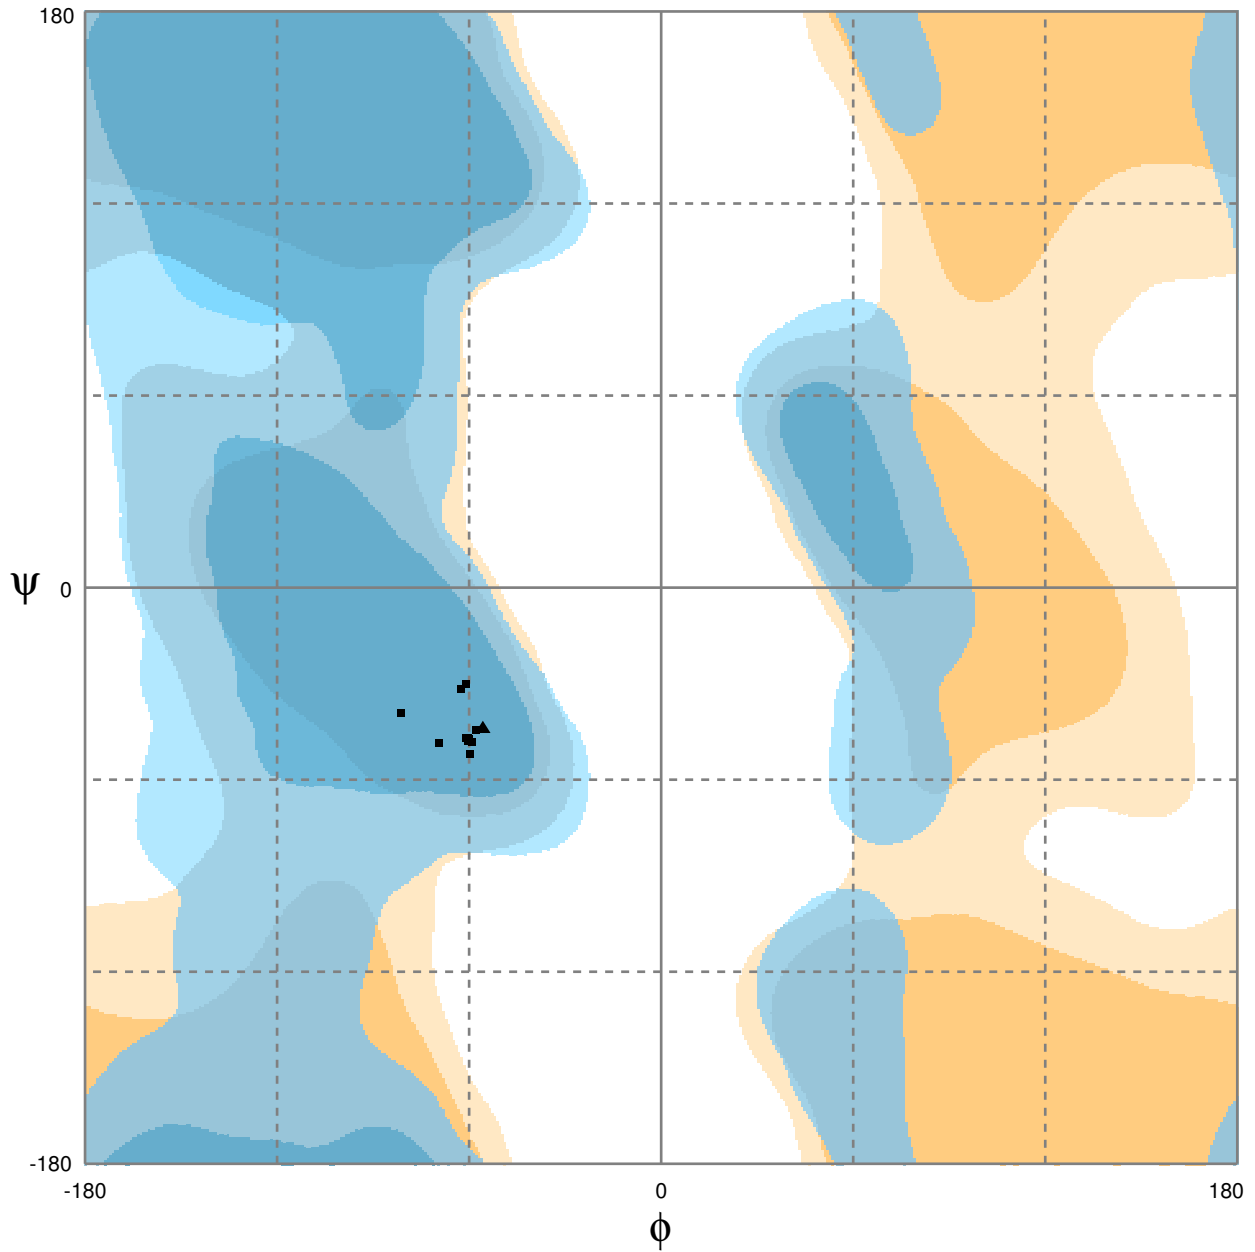

Number of residues in favoured region (~98.0% expected) : 12 (100.0%)  
Number of residues in allowed region (~2.0% expected) : 0 (0.0%)  
Number of residues in outlier region : 0 (0.0%)

RAMPAGE by Paul de Bakker and Simon Lovell available at <http://www-cryst.bioc.cam.ac.uk/rampage/>

Please cite: S.C. Lovell, I.W. Davis, W.B. Arendall III, P.I.W. de Bakker, J.M. Word, M.G. Prisant, J.S. Richardson & D.C. Richardson (2002) Structure validation by  $C\alpha$  geometry:  $\phi/\psi$  and  $C\beta$  deviation. *Proteins: Structure, Function & Genetics*. **50**: 437-450



# Tem\_1aua

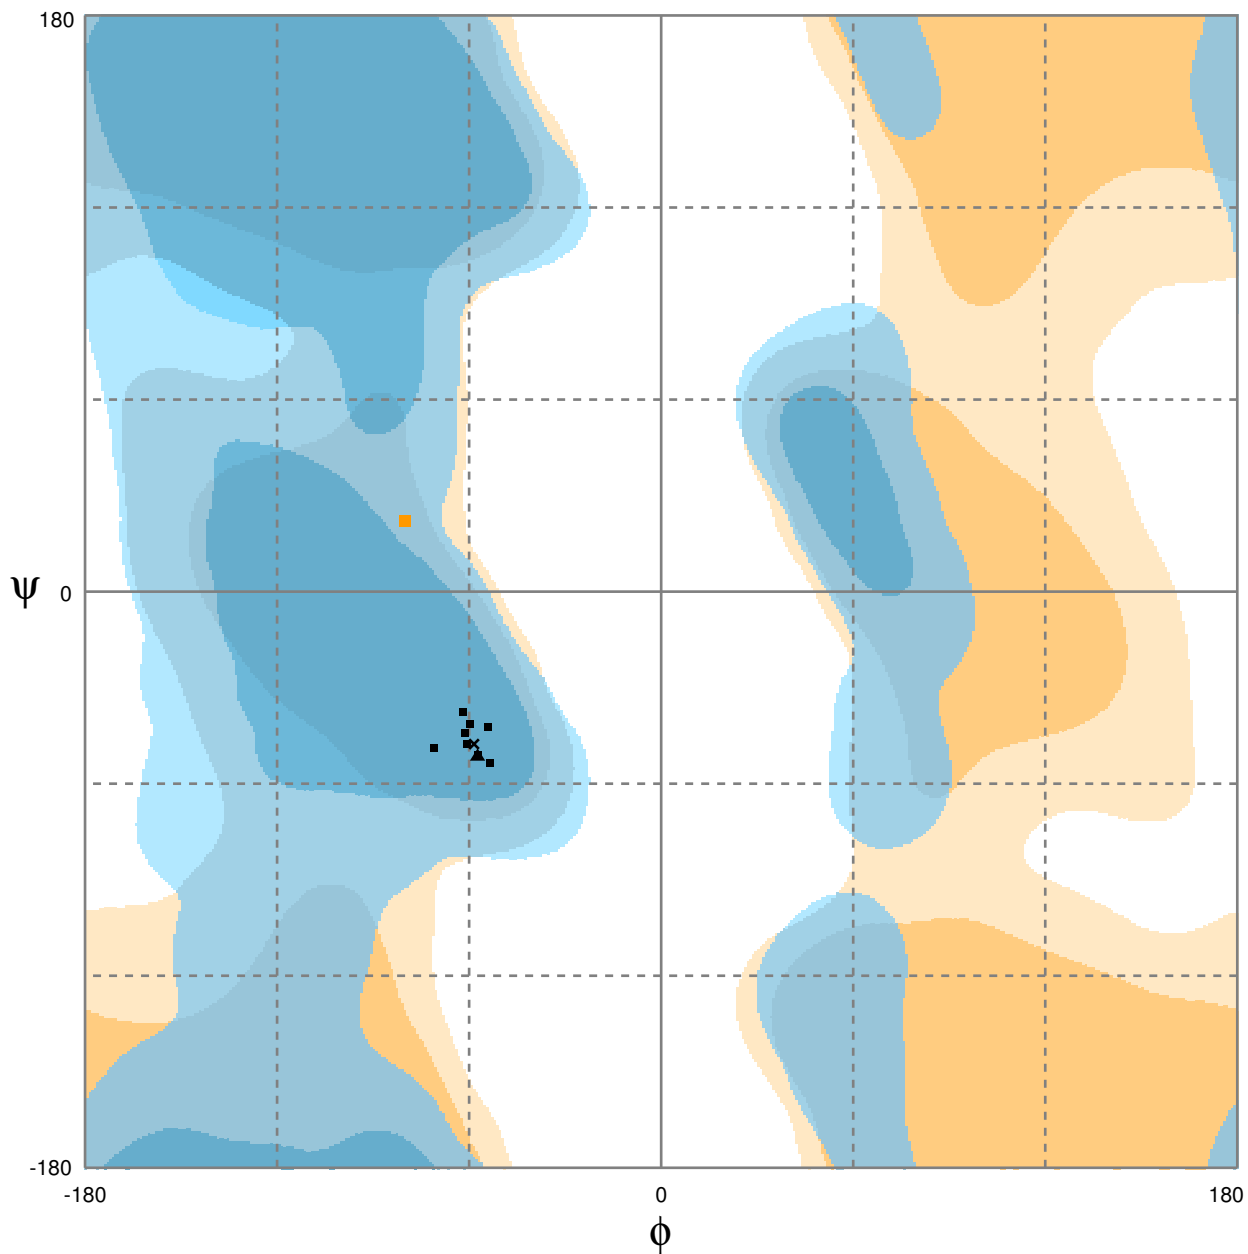

|                                                         |              |
|---------------------------------------------------------|--------------|
| Number of residues in favoured region (~98.0% expected) | : 10 (90.9%) |
| Number of residues in allowed region (~2.0% expected)   | : 1 (9.1%)   |
| Number of residues in outlier region                    | : 0 (0.0%)   |

RAMPAGE by Paul de Bakker and Simon Lovell available at <http://www-cryst.bioc.cam.ac.uk/rampage/>

Please cite: S.C. Lovell, I.W. Davis, W.B. Arendall III, P.I.W. de Bakker, J.M. Word, M.G. Prisant, J.S. Richardson & D.C. Richardson (2002) Structure validation by  $C\alpha$  geometry:  $\phi/\psi$  and  $C\beta$  deviation. *Proteins: Structure, Function & Genetics*. **50**: 437-450

# Tem\_1km

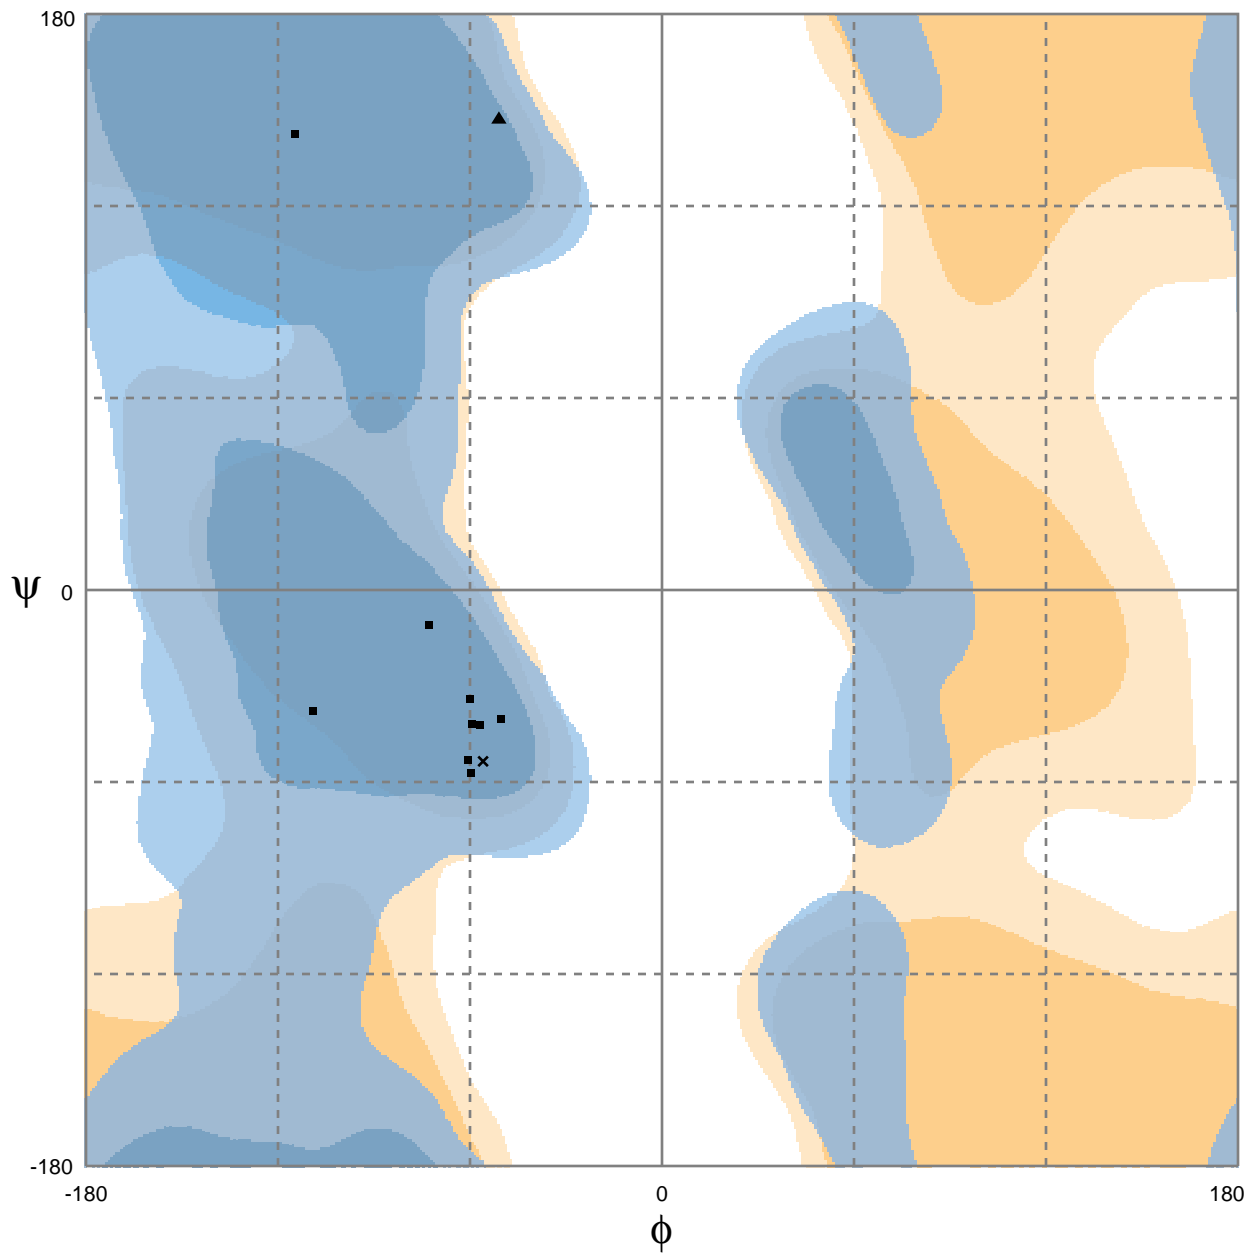

Number of residues in favoured region (~98.0% expected) : 11 (100.0%)  
Number of residues in allowed region (~2.0% expected) : 0 (0.0%)  
Number of residues in outlier region : 0 (0.0%)

RAMPAGE by Paul de Bakker and Simon Lovell available at <http://www-cryst.bioc.cam.ac.uk/rampage/>

Please cite: S.C. Lovell, I.W. Davis, W.B. Arendall III, P.I.W. de Bakker, J.M. Word, M.G. Prisant, J.S. Richardson & D.C. Richardson (2002) Structure validation by C $\alpha$  geometry:  $\phi/\psi$  and C $\beta$  deviation. *Proteins: Structure, Function & Genetics* **50**: 437-450

# Tem\_1la

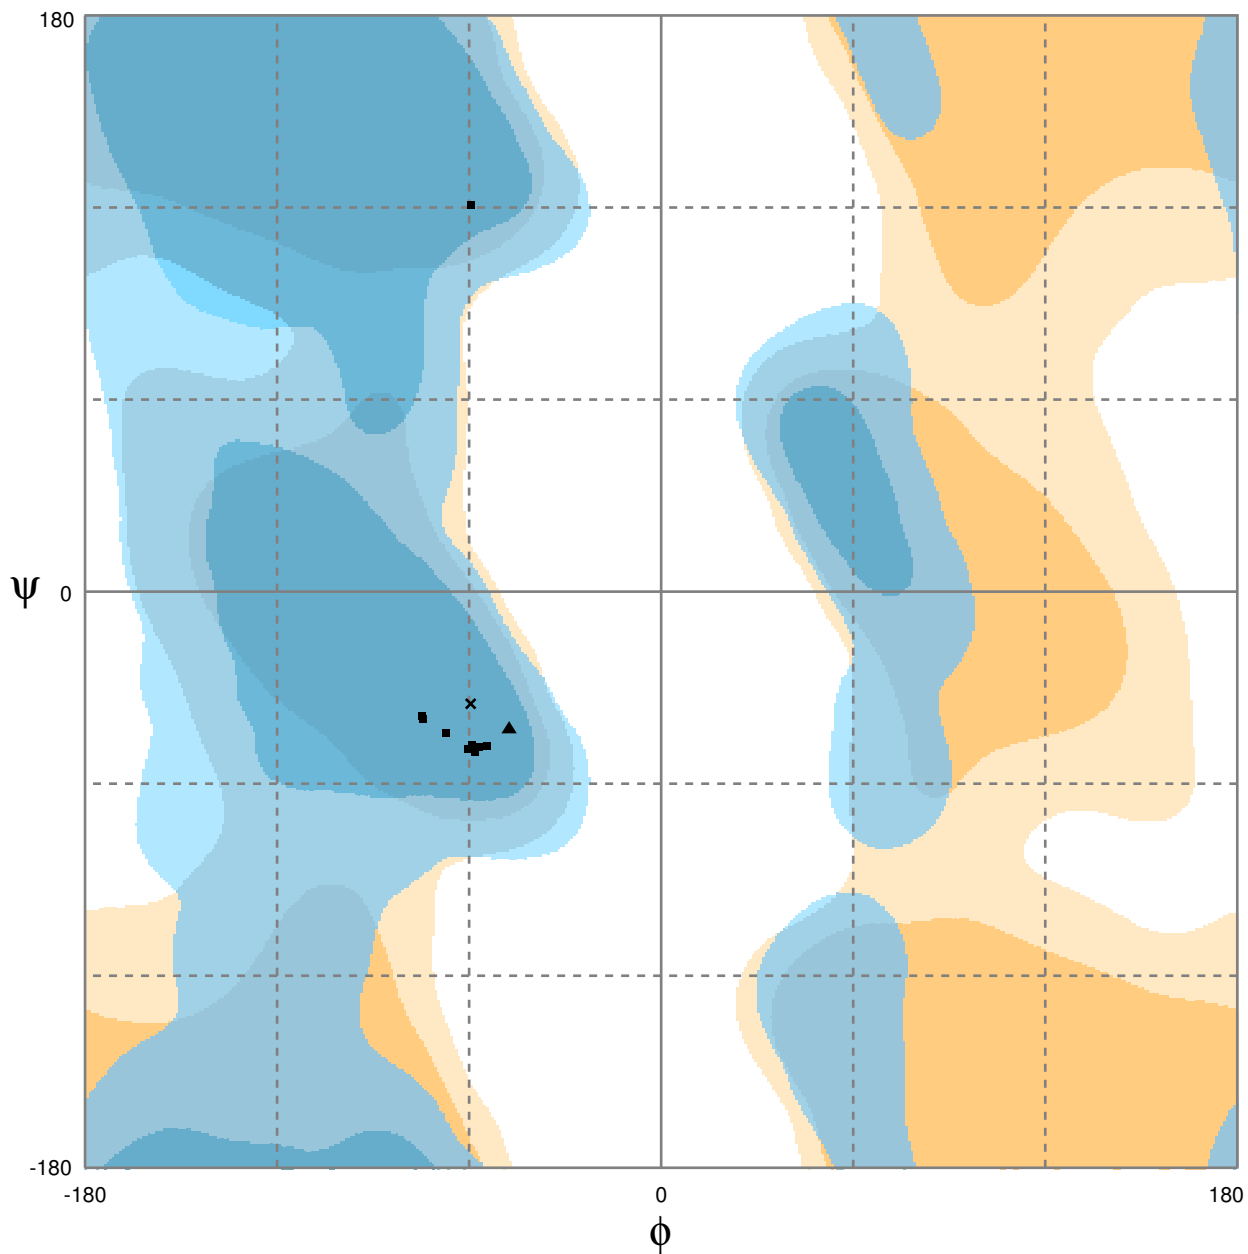

|                                                         |               |
|---------------------------------------------------------|---------------|
| Number of residues in favoured region (~98.0% expected) | : 11 (100.0%) |
| Number of residues in allowed region (~2.0% expected)   | : 0 (0.0%)    |
| Number of residues in outlier region                    | : 0 (0.0%)    |

RAMPAGE by Paul de Bakker and Simon Lovell available at <http://www-cryst.bioc.cam.ac.uk/rampage/>

Please cite: S.C. Lovell, I.W. Davis, W.B. Arendall III, P.I.W. de Bakker, J.M. Word, M.G. Prisant, J.S. Richardson & D.C. Richardson (2002) Structure validation by  $C\alpha$  geometry:  $\phi/\psi$  and  $C\beta$  deviation. *Proteins: Structure, Function & Genetics*. **50**: 437-450

# Tem\_1lb

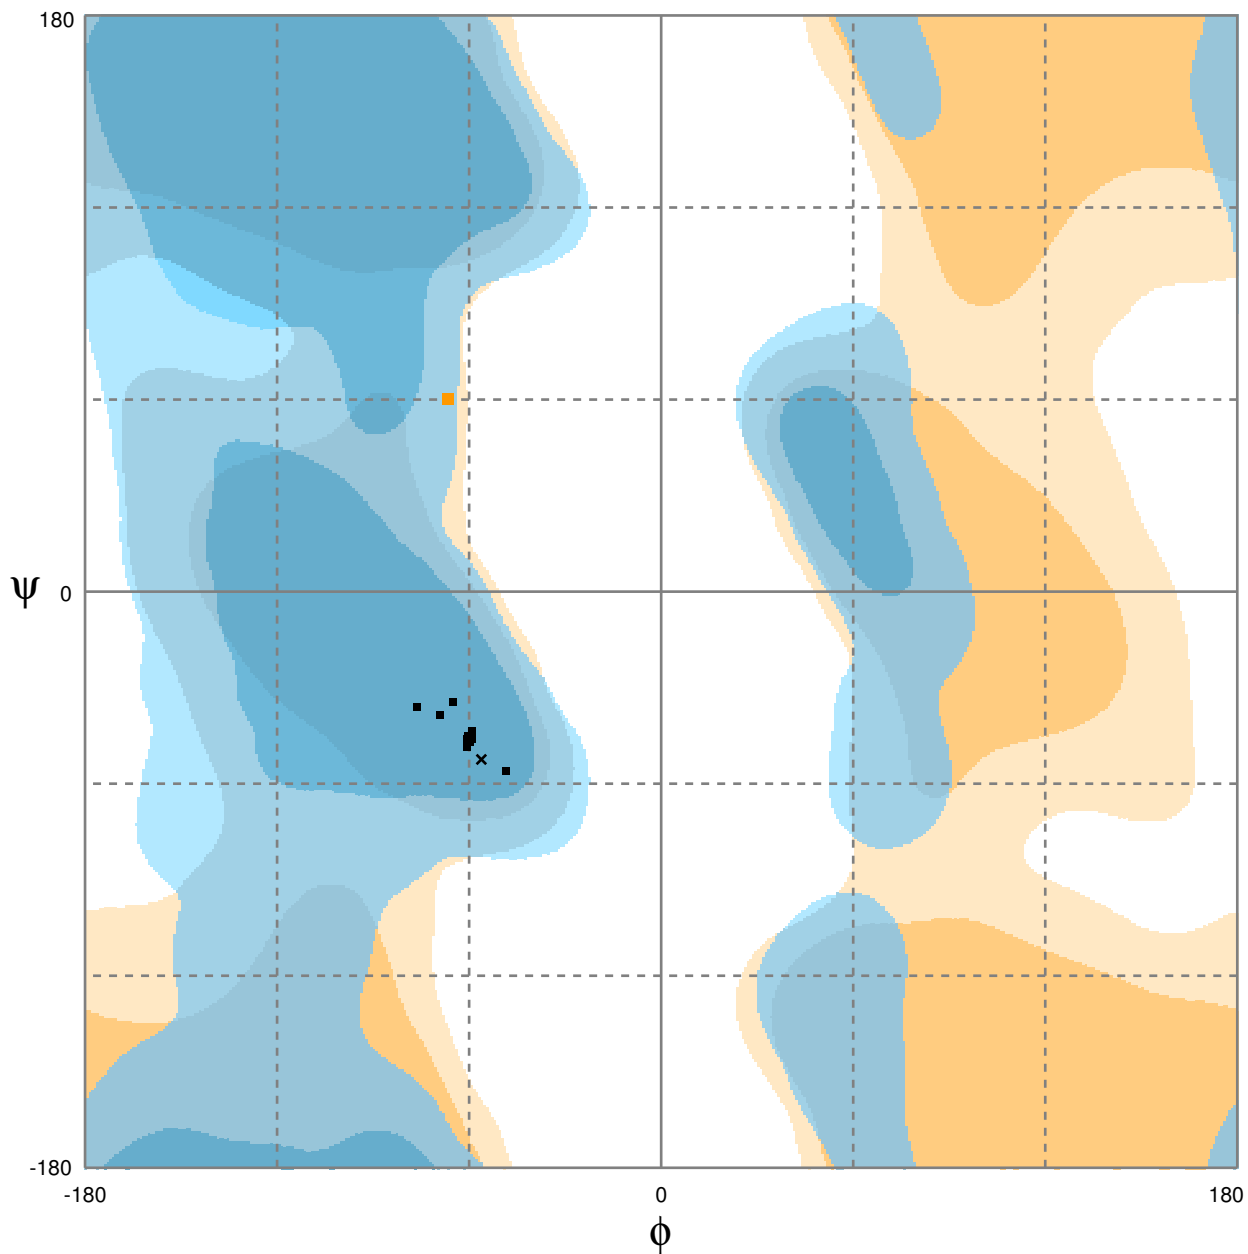

|                                                         |              |
|---------------------------------------------------------|--------------|
| Number of residues in favoured region (~98.0% expected) | : 11 (91.7%) |
| Number of residues in allowed region (~2.0% expected)   | : 1 (8.3%)   |
| Number of residues in outlier region                    | : 0 (0.0%)   |

RAMPAGE by Paul de Bakker and Simon Lovell available at <http://www-cryst.bioc.cam.ac.uk/rampage/>

Please cite: S.C. Lovell, I.W. Davis, W.B. Arendall III, P.I.W. de Bakker, J.M. Word, M.G. Prisant, J.S. Richardson & D.C. Richardson (2002) Structure validation by  $C\alpha$  geometry:  $\phi/\psi$  and  $C\beta$  deviation. *Proteins: Structure, Function & Genetics*. **50**: 437-450

# Tem\_1lc

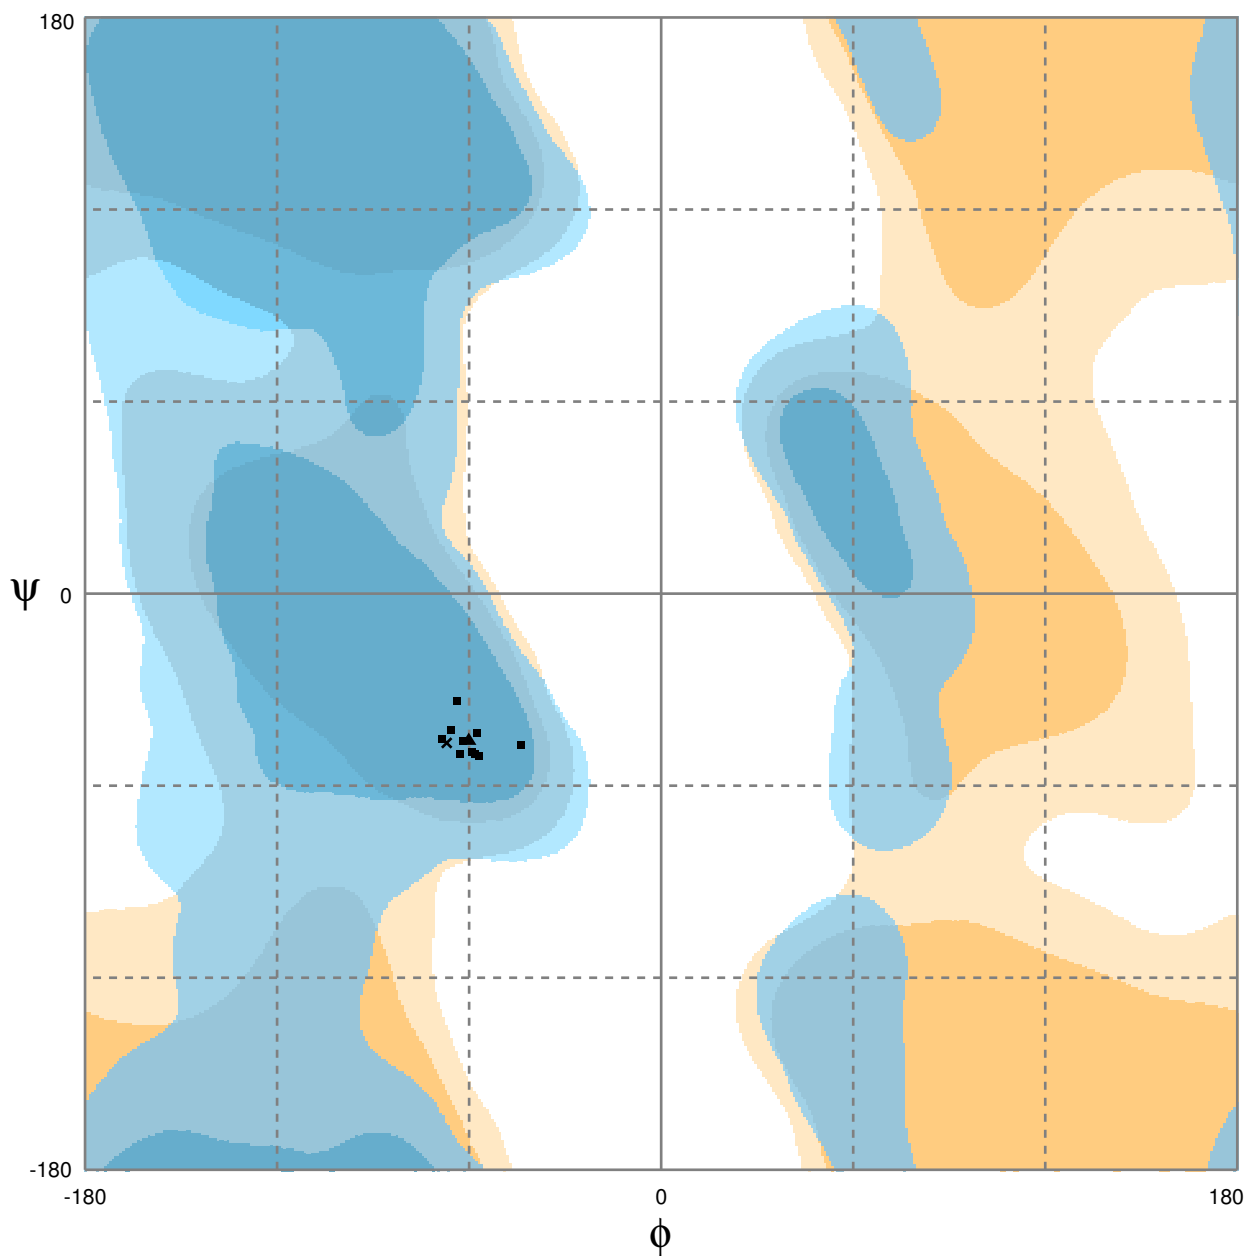

|                                                         |               |
|---------------------------------------------------------|---------------|
| Number of residues in favoured region (~98.0% expected) | : 12 (100.0%) |
| Number of residues in allowed region (~2.0% expected)   | : 0 (0.0%)    |
| Number of residues in outlier region                    | : 0 (0.0%)    |

RAMPAGE by Paul de Bakker and Simon Lovell available at <http://www-cryst.bioc.cam.ac.uk/rampage/>

Please cite: S.C. Lovell, I.W. Davis, W.B. Arendall III, P.I.W. de Bakker, J.M. Word, M.G. Prisant, J.S. Richardson & D.C. Richardson (2002) Structure validation by  $C\alpha$  geometry:  $\phi/\psi$  and  $C\beta$  deviation. *Proteins: Structure, Function & Genetics*. **50**: 437-450

# Tem\_10a

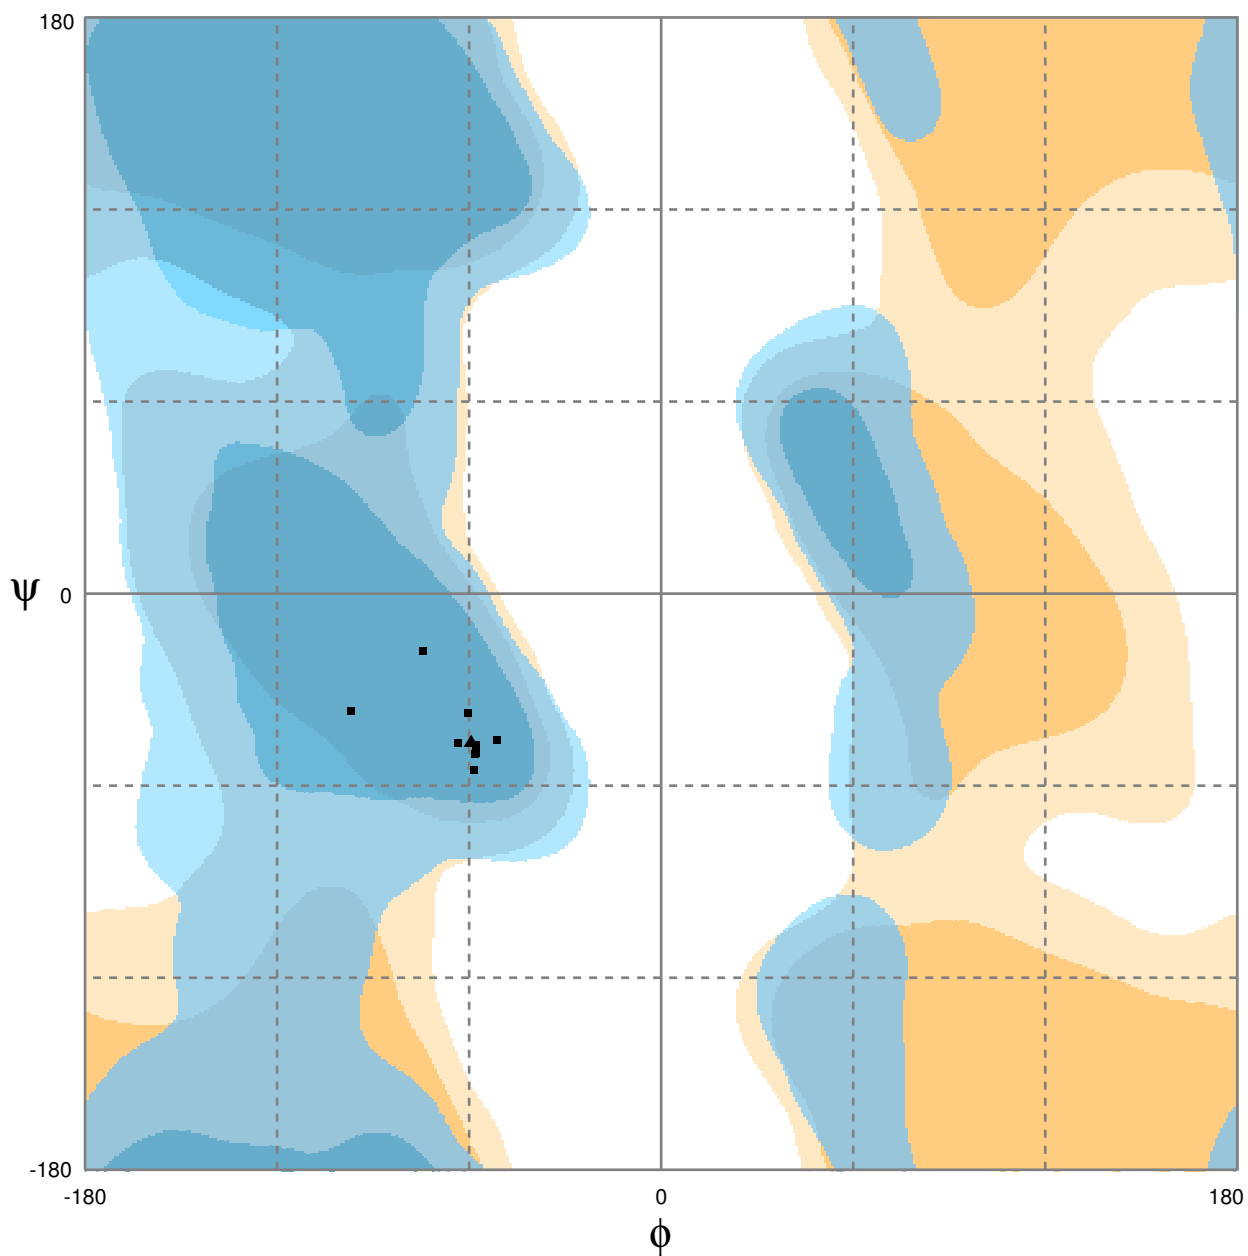

Number of residues in favoured region (~98.0% expected) : 11 (100.0%)  
Number of residues in allowed region (~2.0% expected) : 0 (0.0%)  
Number of residues in outlier region : 0 (0.0%)

RAMPAGE by Paul de Bakker and Simon Lovell available at <http://www-cryst.bioc.cam.ac.uk/rampage/>

Please cite: S.C. Lovell, I.W. Davis, W.B. Arendall III, P.I.W. de Bakker, J.M. Word, M.G. Prisant, J.S. Richardson & D.C. Richardson (2002) Structure validation by  $C\alpha$  geometry:  $\phi/\psi$  and  $C\beta$  deviation. *Proteins: Structure, Function & Genetics*. **50**: 437-450

# Tem\_1ob

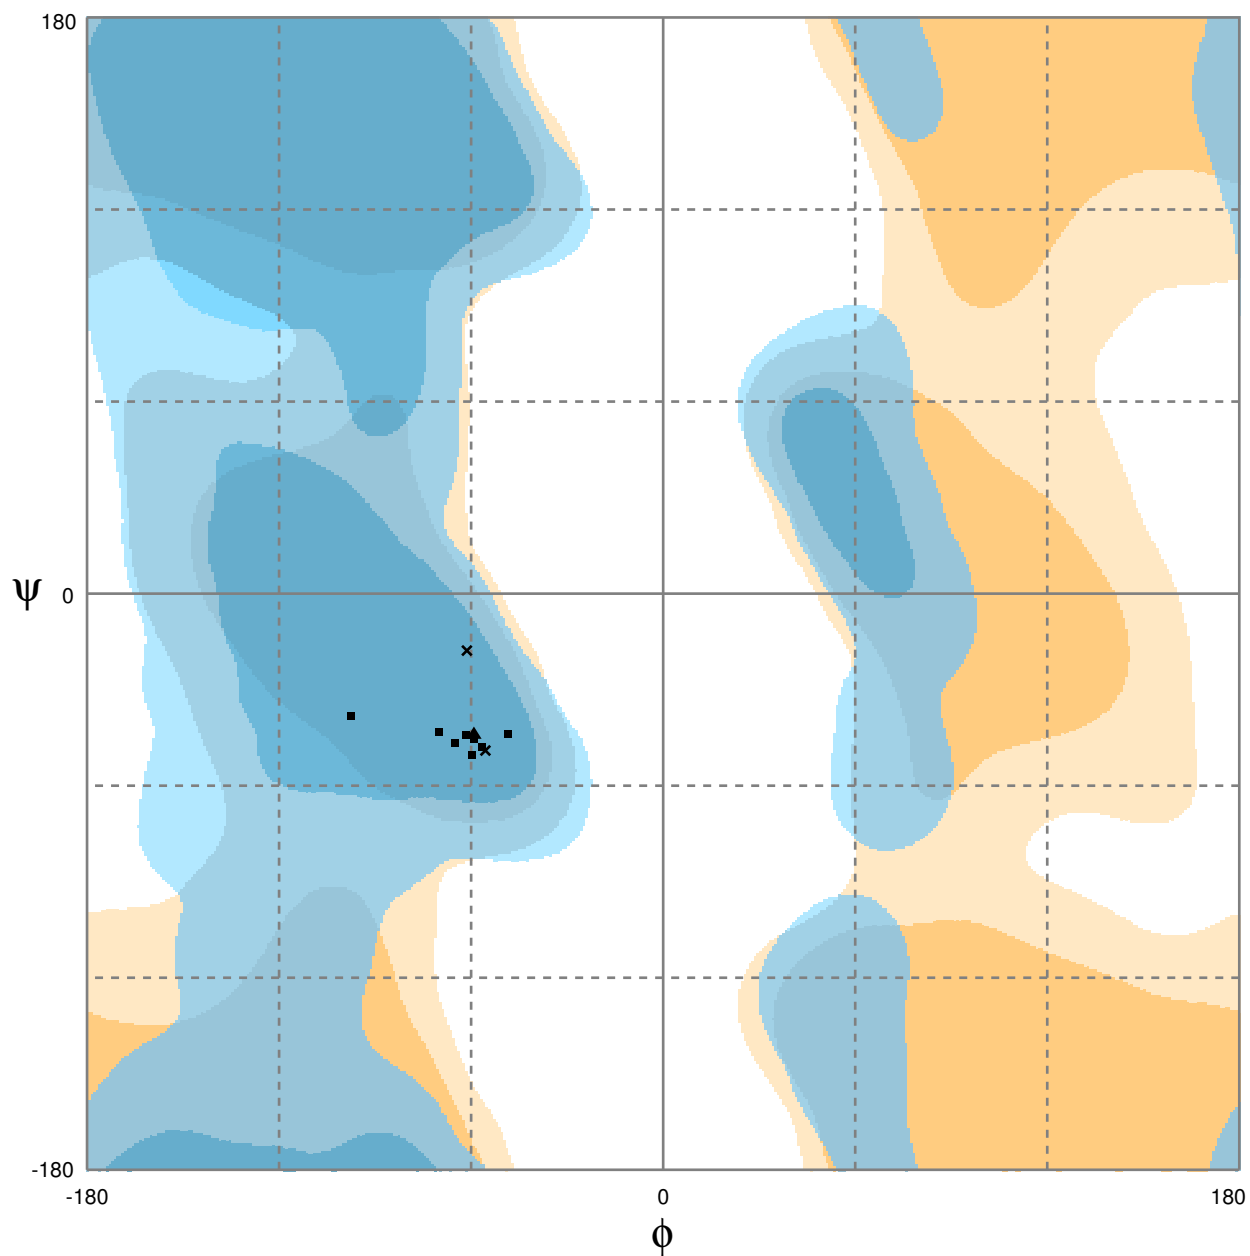

|                                                         |               |
|---------------------------------------------------------|---------------|
| Number of residues in favoured region (~98.0% expected) | : 11 (100.0%) |
| Number of residues in allowed region (~2.0% expected)   | : 0 (0.0%)    |
| Number of residues in outlier region                    | : 0 (0.0%)    |

RAMPAGE by Paul de Bakker and Simon Lovell available at <http://www-cryst.bioc.cam.ac.uk/rampage/>

Please cite: S.C. Lovell, I.W. Davis, W.B. Arendall III, P.I.W. de Bakker, J.M. Word, M.G. Prisant, J.S. Richardson & D.C. Richardson (2002) Structure validation by  $C\alpha$  geometry:  $\phi/\psi$  and  $C\beta$  deviation. *Proteins: Structure, Function & Genetics*. **50**: 437-450

# Tem\_1oc

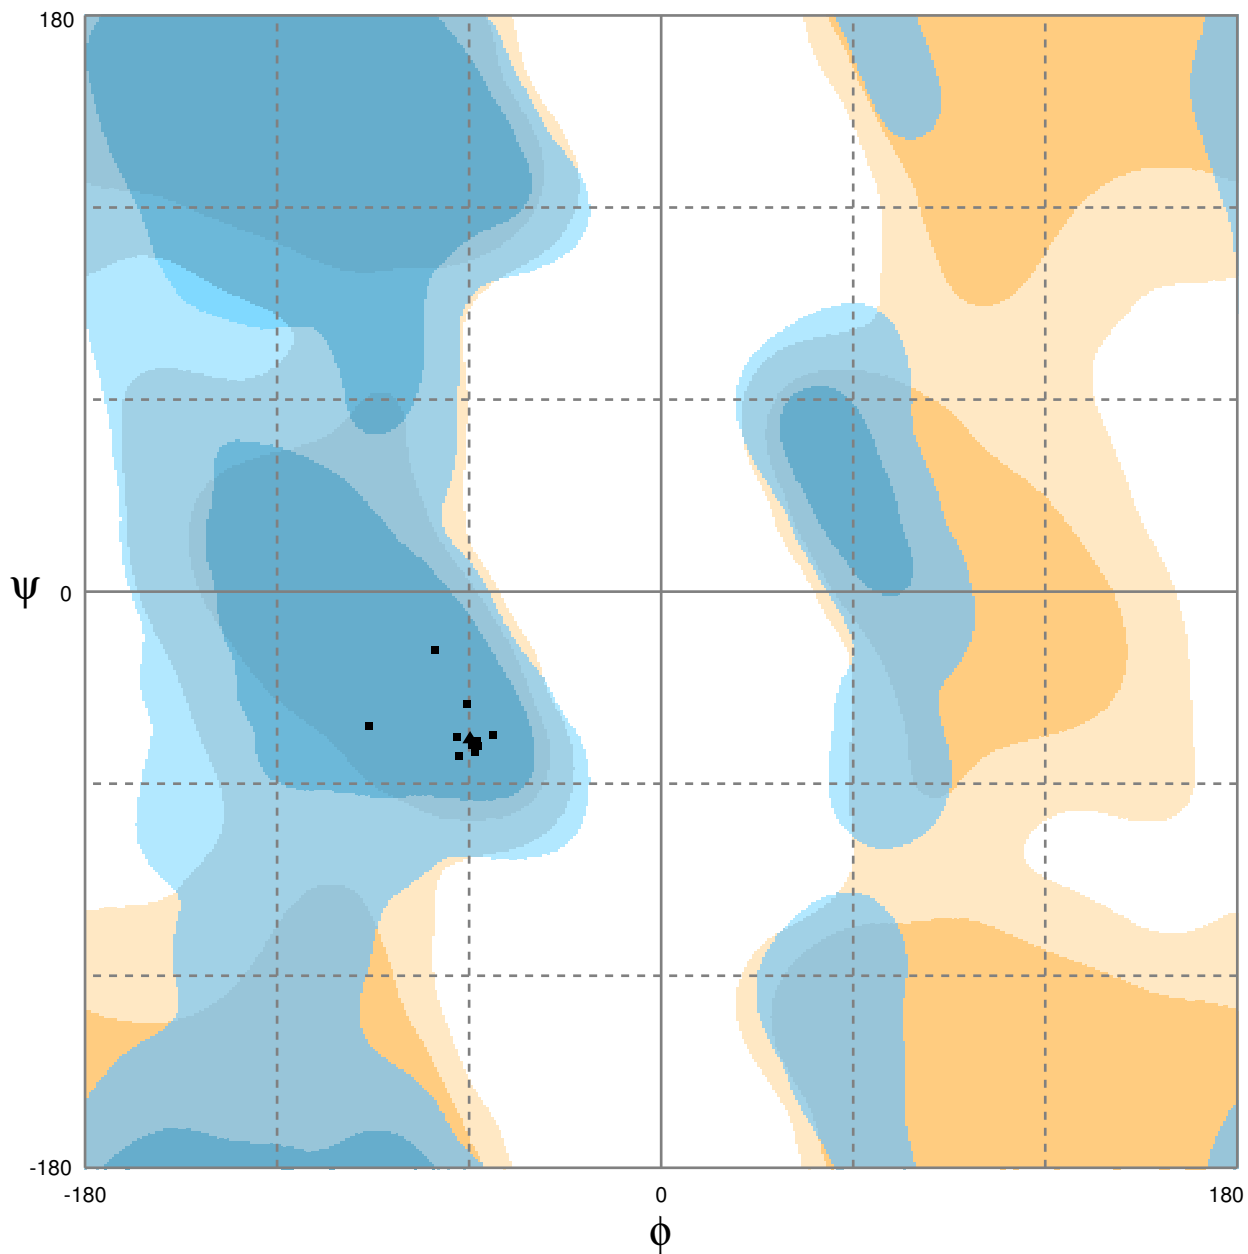

Number of residues in favoured region (~98.0% expected) : 11 (100.0%)  
Number of residues in allowed region (~2.0% expected) : 0 (0.0%)  
Number of residues in outlier region : 0 (0.0%)

RAMPAGE by Paul de Bakker and Simon Lovell available at <http://www-cryst.bioc.cam.ac.uk/rampage/>

Please cite: S.C. Lovell, I.W. Davis, W.B. Arendall III, P.I.W. de Bakker, J.M. Word, M.G. Prisant, J.S. Richardson & D.C. Richardson (2002) Structure validation by  $C\alpha$  geometry:  $\phi/\psi$  and  $C\beta$  deviation. *Proteins: Structure, Function & Genetics*. **50**: 437-450



# Tem\_1od

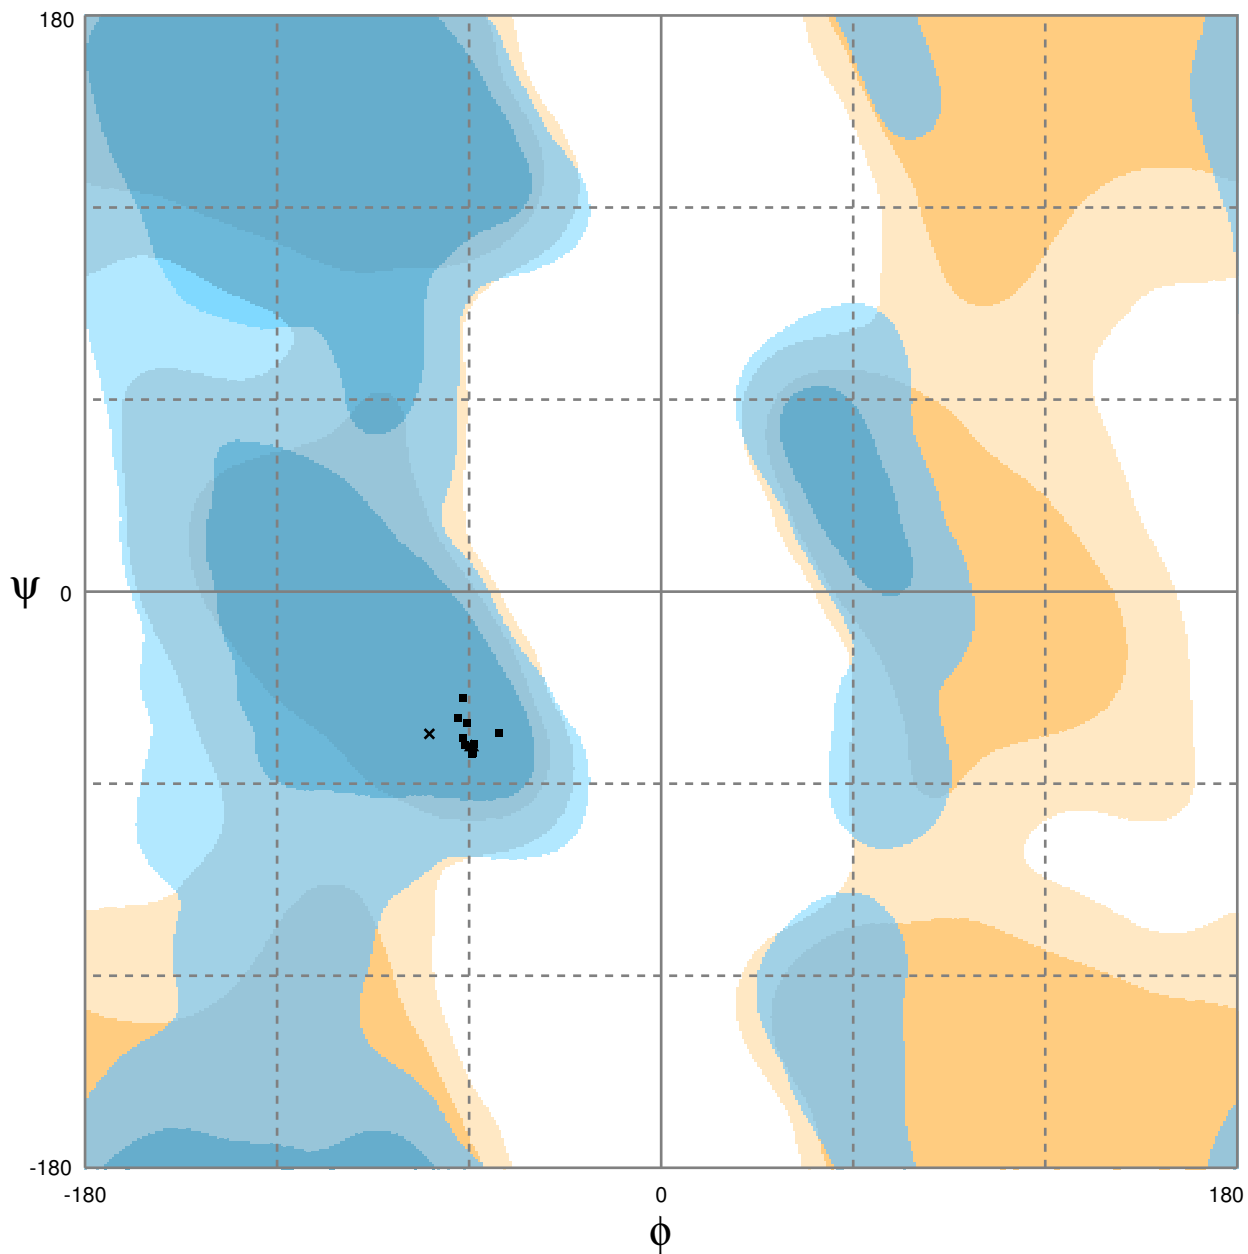

Number of residues in favoured region (~98.0% expected) : 11 (100.0%)  
Number of residues in allowed region (~2.0% expected) : 0 (0.0%)  
Number of residues in outlier region : 0 (0.0%)

RAMPAGE by Paul de Bakker and Simon Lovell available at <http://www-cryst.bioc.cam.ac.uk/rampage/>

Please cite: S.C. Lovell, I.W. Davis, W.B. Arendall III, P.I.W. de Bakker, J.M. Word, M.G. Prisant, J.S. Richardson & D.C. Richardson (2002) Structure validation by  $C\alpha$  geometry:  $\phi/\psi$  and  $C\beta$  deviation. *Proteins: Structure, Function & Genetics*. **50**: 437-450

# Tem\_1ola

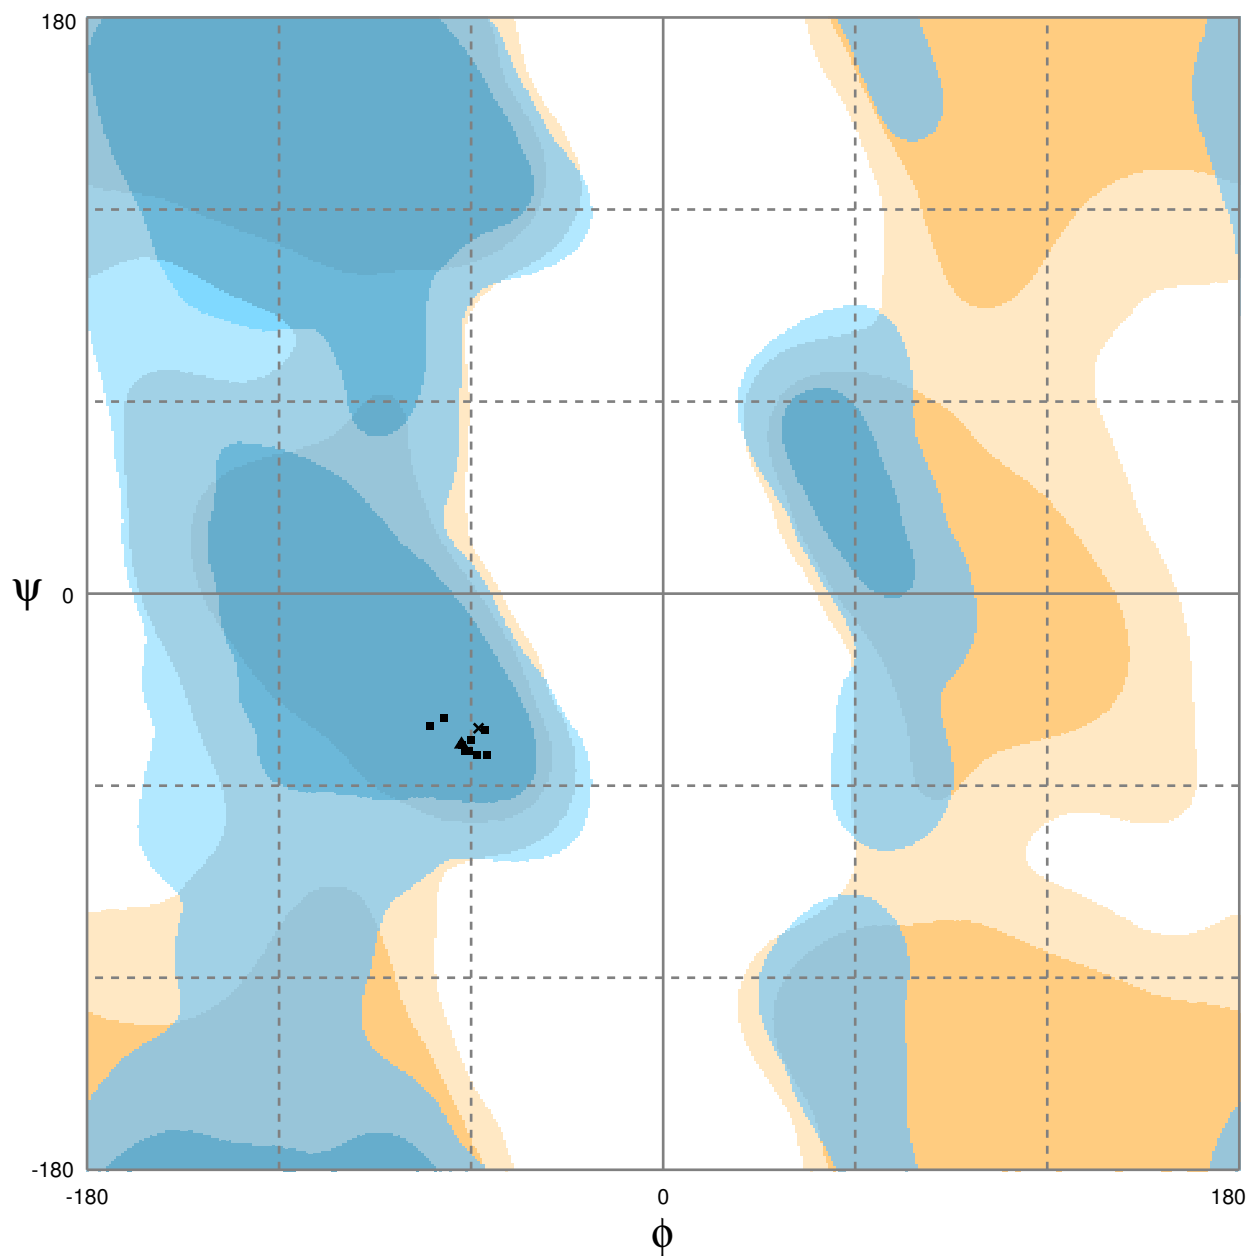

|                                                         |               |
|---------------------------------------------------------|---------------|
| Number of residues in favoured region (~98.0% expected) | : 11 (100.0%) |
| Number of residues in allowed region (~2.0% expected)   | : 0 (0.0%)    |
| Number of residues in outlier region                    | : 0 (0.0%)    |

RAMPAGE by Paul de Bakker and Simon Lovell available at <http://www-cryst.bioc.cam.ac.uk/rampage/>

Please cite: S.C. Lovell, I.W. Davis, W.B. Arendall III, P.I.W. de Bakker, J.M. Word, M.G. Prisant, J.S. Richardson & D.C. Richardson (2002) Structure validation by  $C\alpha$  geometry:  $\phi/\psi$  and  $C\beta$  deviation. *Proteins: Structure, Function & Genetics*. **50**: 437-450

# Tem\_1olb

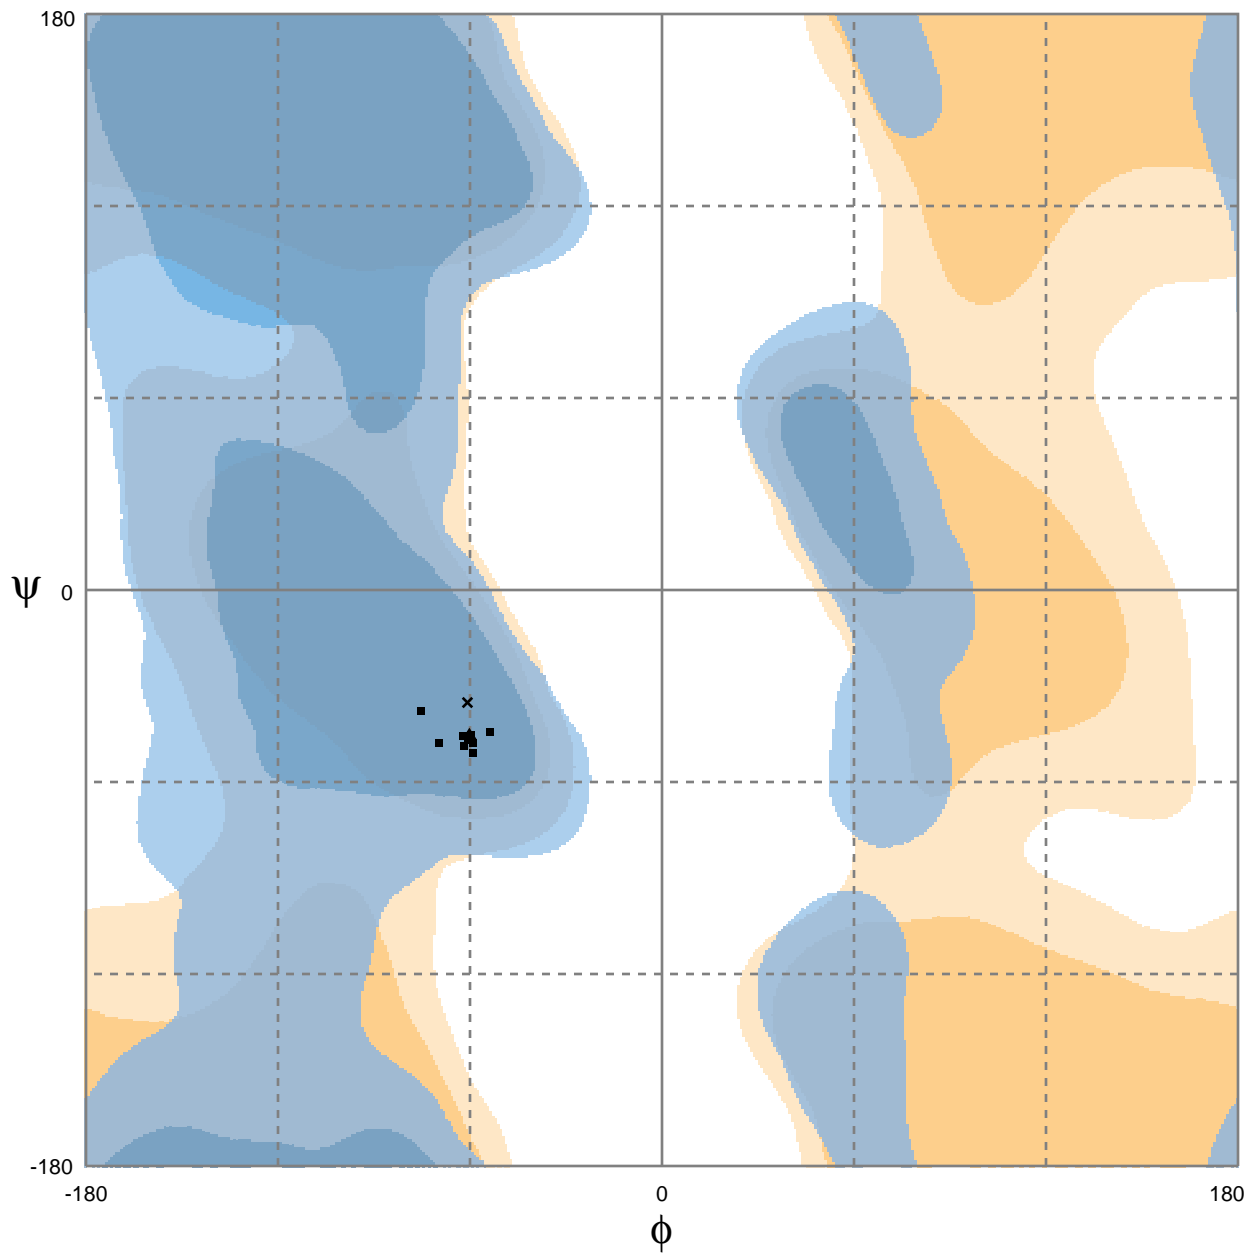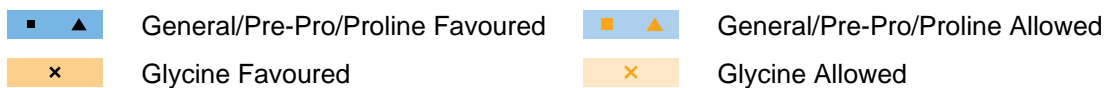

Number of residues in favoured region (~98.0% expected) : 11 (100.0%)  
Number of residues in allowed region (~2.0% expected) : 0 (0.0%)  
Number of residues in outlier region : 0 (0.0%)

RAMPAGE by Paul de Bakker and Simon Lovell available at <http://www-cryst.bioc.cam.ac.uk/rampage/>

Please cite: S.C. Lovell, I.W. Davis, W.B. Arendall III, P.I.W. de Bakker, J.M. Word, M.G. Prisant, J.S. Richardson & D.C. Richardson (2002) Structure validation by C $\alpha$  geometry:  $\phi/\psi$  and C $\beta$  deviation. *Proteins: Structure, Function & Genetics* **50**: 437-450

# Tem\_1p

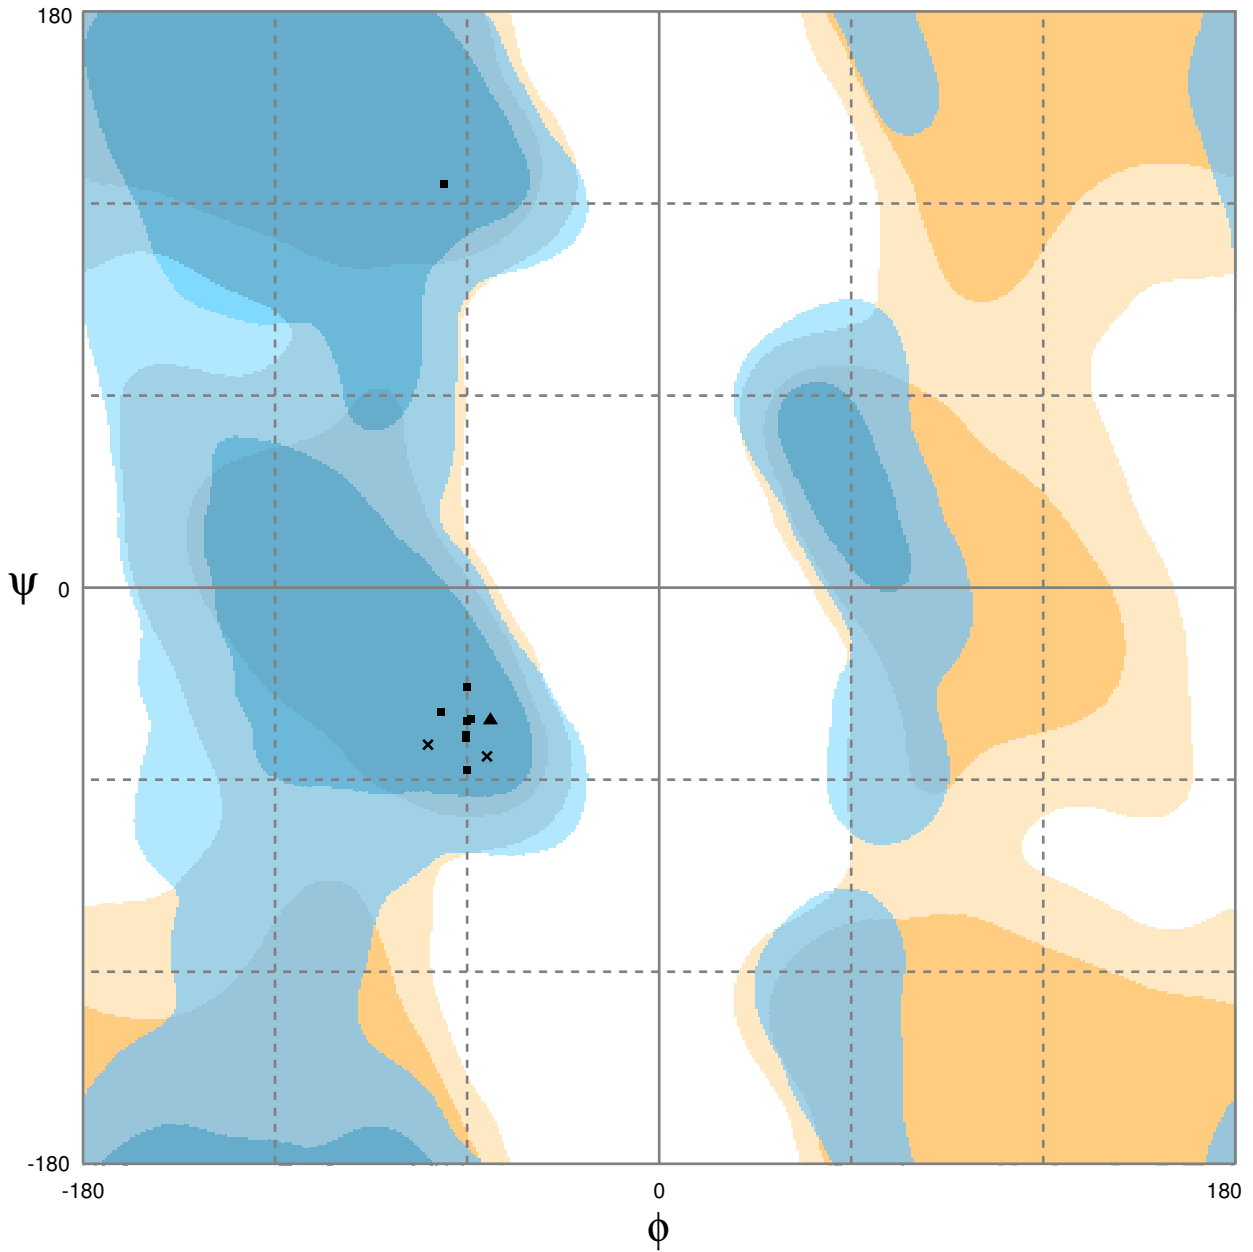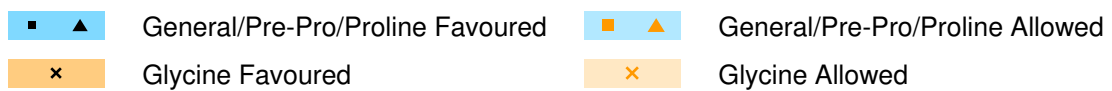

|                                                         |               |
|---------------------------------------------------------|---------------|
| Number of residues in favoured region (~98.0% expected) | : 11 (100.0%) |
| Number of residues in allowed region (~2.0% expected)   | : 0 (0.0%)    |
| Number of residues in outlier region                    | : 0 (0.0%)    |

RAMPAGE by Paul de Bakker and Simon Lovell available at <http://www-cryst.bioc.cam.ac.uk/rampage/>

Please cite: S.C. Lovell, I.W. Davis, W.B. Arendall III, P.I.W. de Bakker, J.M. Word, M.G. Prisant, J.S. Richardson & D.C. Richardson (2002) Structure validation by  $C\alpha$  geometry:  $\phi/\psi$  and  $C\beta$  deviation. *Proteins: Structure, Function & Genetics*. **50**: 437-450

# Tem\_1pla

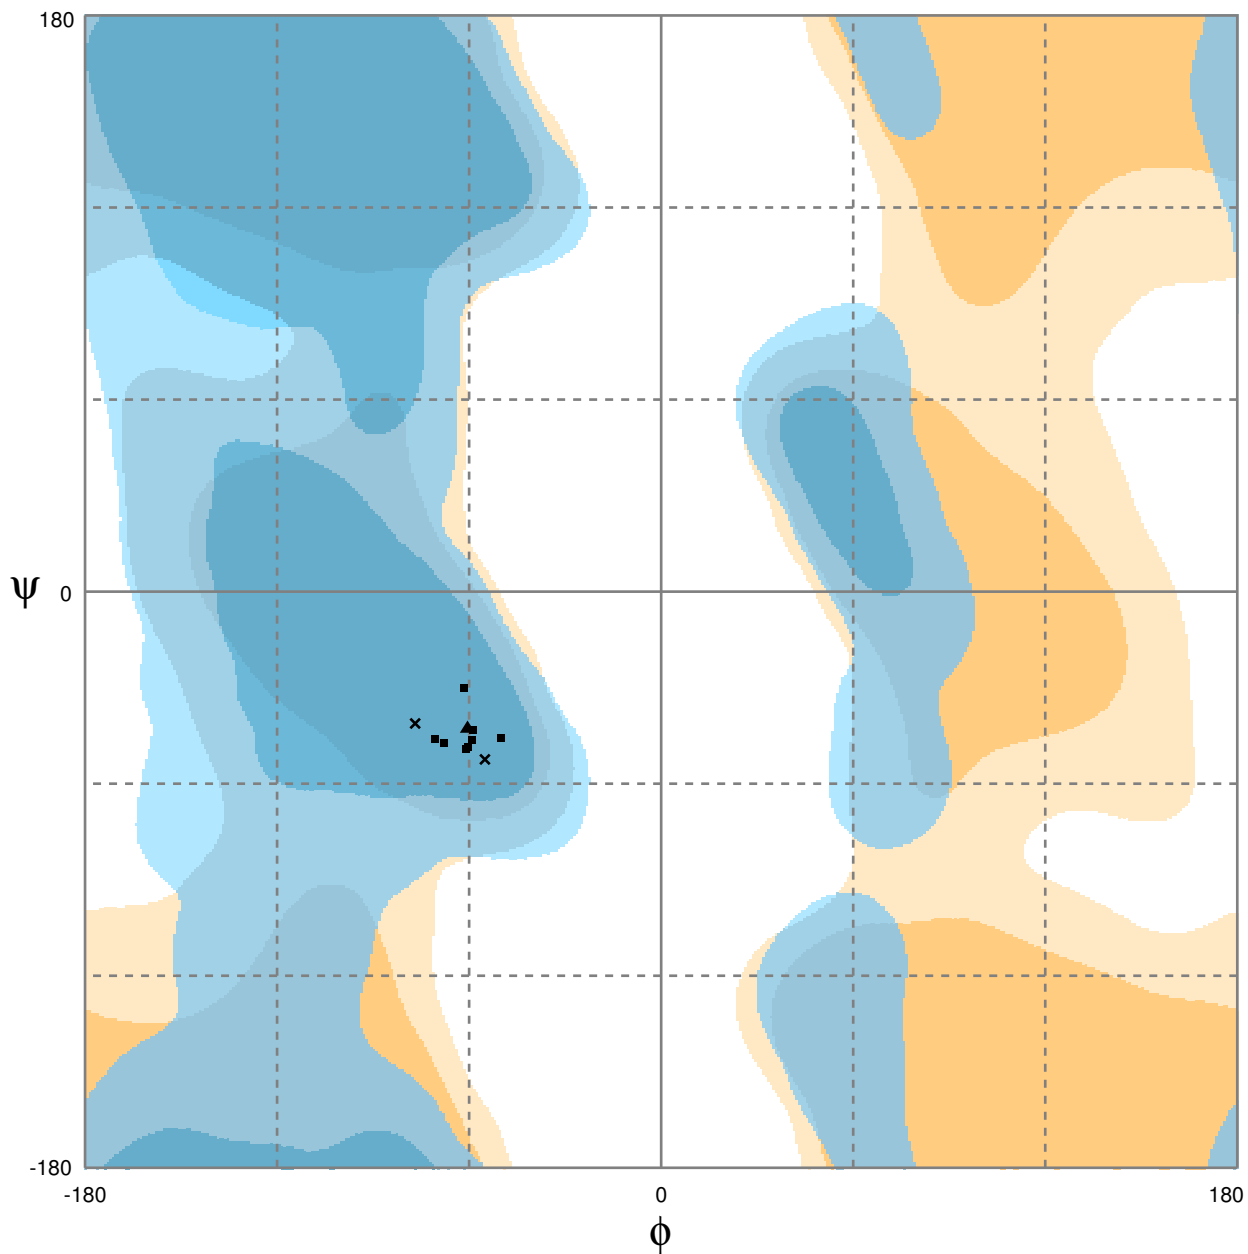

|                                                         |               |
|---------------------------------------------------------|---------------|
| Number of residues in favoured region (~98.0% expected) | : 11 (100.0%) |
| Number of residues in allowed region (~2.0% expected)   | : 0 (0.0%)    |
| Number of residues in outlier region                    | : 0 (0.0%)    |

RAMPAGE by Paul de Bakker and Simon Lovell available at <http://www-cryst.bioc.cam.ac.uk/rampage/>

Please cite: S.C. Lovell, I.W. Davis, W.B. Arendall III, P.I.W. de Bakker, J.M. Word, M.G. Prisant, J.S. Richardson & D.C. Richardson (2002) Structure validation by  $C\alpha$  geometry:  $\phi/\psi$  and  $C\beta$  deviation. *Proteins: Structure, Function & Genetics*. **50**: 437-450

# Tem\_1pra

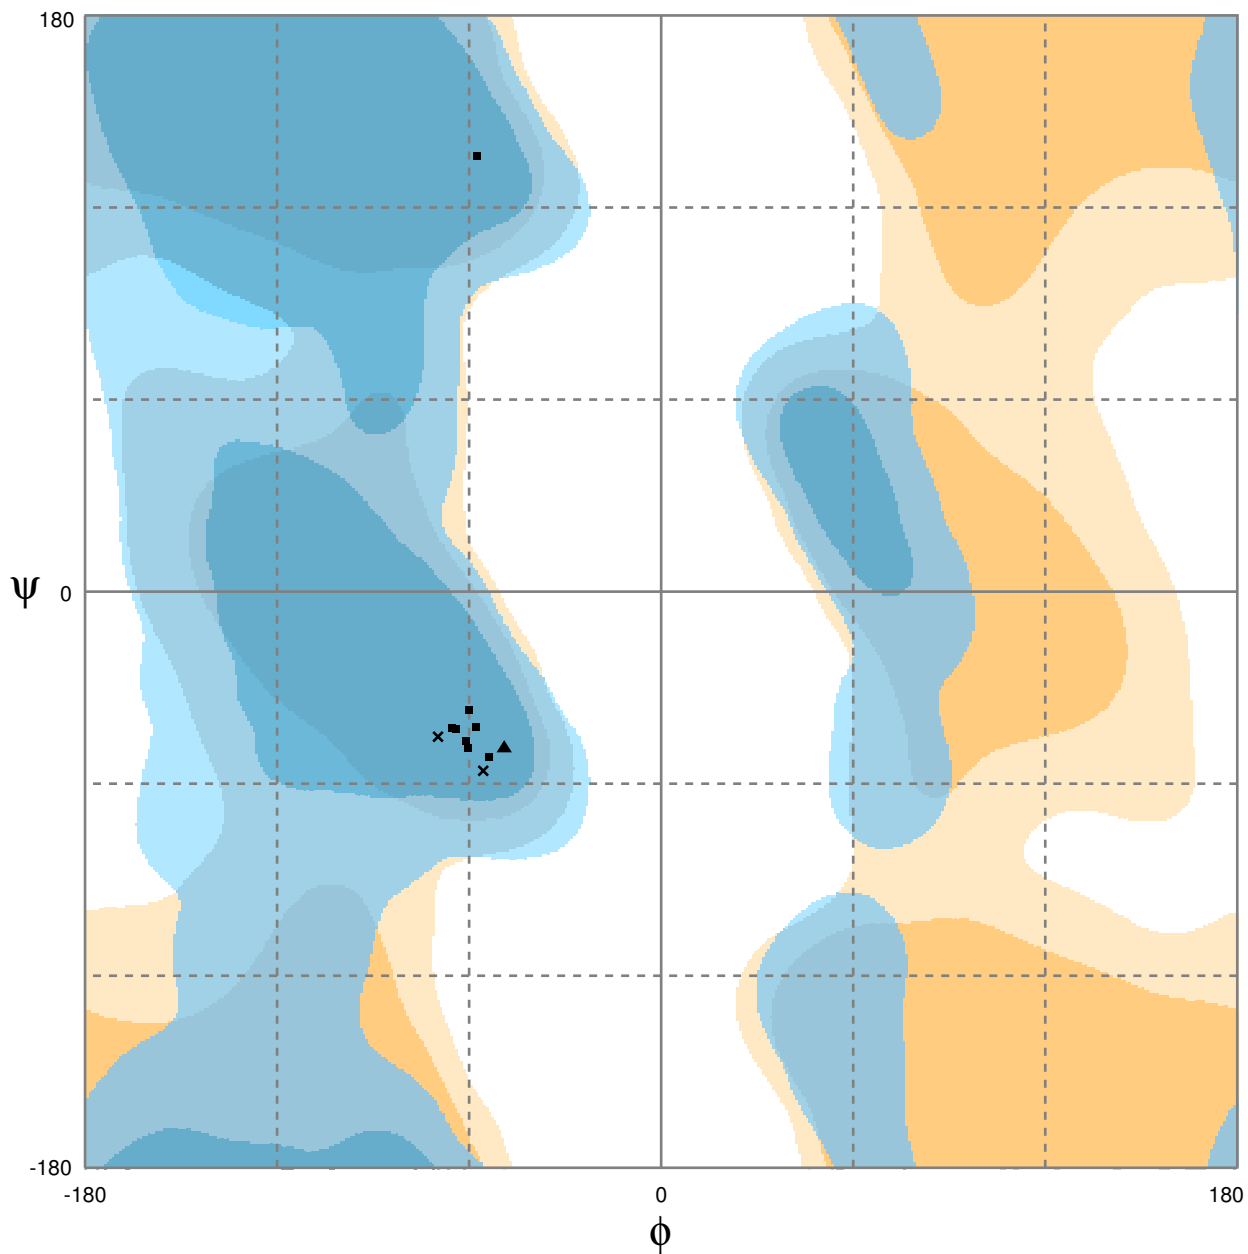

|                                                         |               |
|---------------------------------------------------------|---------------|
| Number of residues in favoured region (~98.0% expected) | : 11 (100.0%) |
| Number of residues in allowed region (~2.0% expected)   | : 0 (0.0%)    |
| Number of residues in outlier region                    | : 0 (0.0%)    |

RAMPAGE by Paul de Bakker and Simon Lovell available at <http://www-cryst.bioc.cam.ac.uk/rampage/>

Please cite: S.C. Lovell, I.W. Davis, W.B. Arendall III, P.I.W. de Bakker, J.M. Word, M.G. Prisant, J.S. Richardson & D.C. Richardson (2002) Structure validation by  $C\alpha$  geometry:  $\phi/\psi$  and  $C\beta$  deviation. *Proteins: Structure, Function & Genetics*. **50**: 437-450

# Tem\_1rna

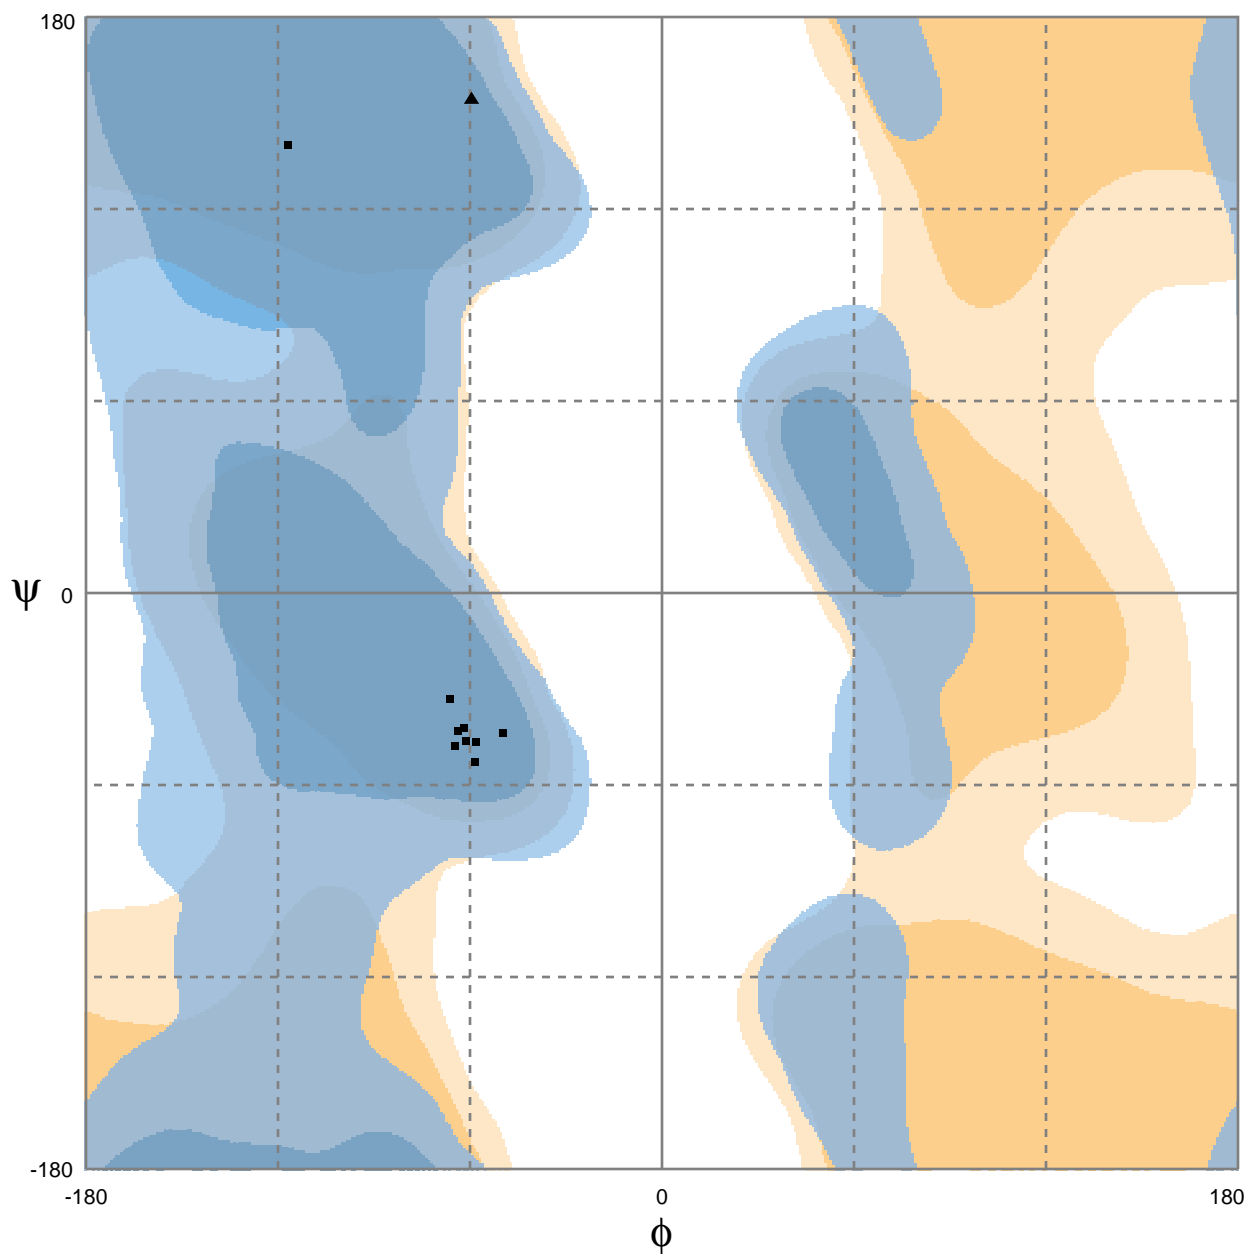

Number of residues in favoured region (~98.0% expected) : 10 (100.0%)  
Number of residues in allowed region (~2.0% expected) : 0 (0.0%)  
Number of residues in outlier region : 0 (0.0%)

RAMPAGE by Paul de Bakker and Simon Lovell available at <http://www-cryst.bioc.cam.ac.uk/rampage/>

Please cite: S.C. Lovell, I.W. Davis, W.B. Arendall III, P.I.W. de Bakker, J.M. Word, M.G. Prisant, J.S. Richardson & D.C. Richardson (2002) Structure validation by C $\alpha$  geometry:  $\phi/\psi$  and C $\beta$  deviation. *Proteins: Structure, Function & Genetics* **50**: 437-450

# Tem\_1rnb

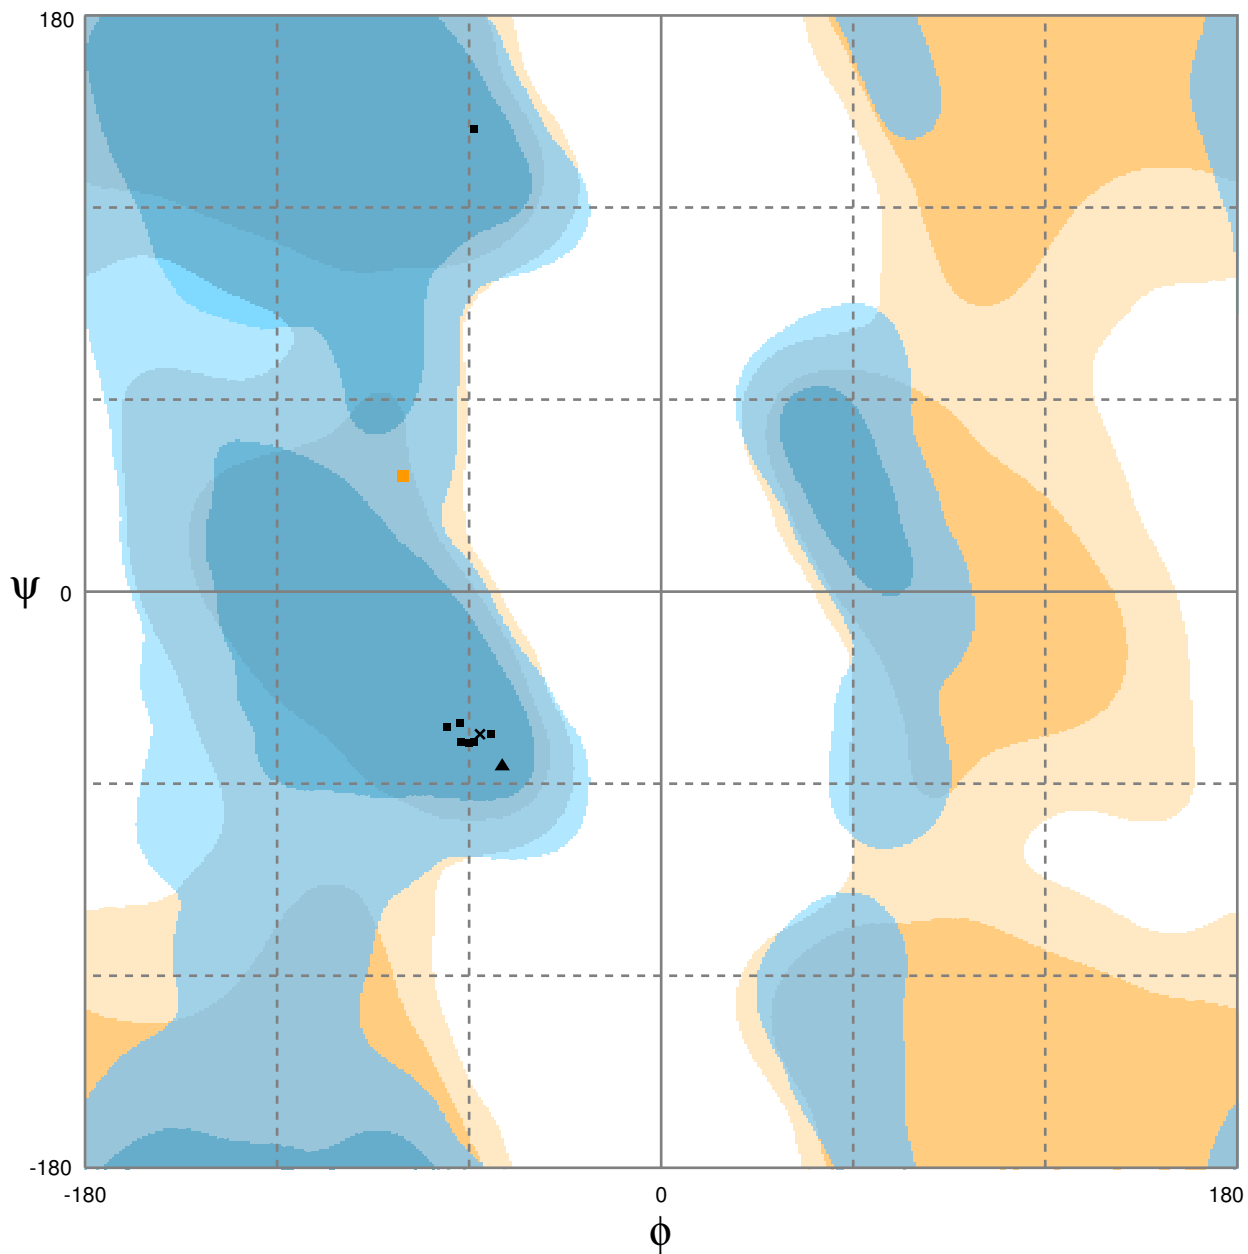

|     |                                  |     |                                 |
|-----|----------------------------------|-----|---------------------------------|
| ■ ▲ | General/Pre-Pro/Proline Favoured | ■ ▲ | General/Pre-Pro/Proline Allowed |
| ×   | Glycine Favoured                 | ×   | Glycine Allowed                 |

|                                                         |             |
|---------------------------------------------------------|-------------|
| Number of residues in favoured region (~98.0% expected) | : 9 (90.0%) |
| Number of residues in allowed region (~2.0% expected)   | : 1 (10.0%) |
| Number of residues in outlier region                    | : 0 (0.0%)  |

RAMPAGE by Paul de Bakker and Simon Lovell available at <http://www-cryst.bioc.cam.ac.uk/rampage/>

Please cite: S.C. Lovell, I.W. Davis, W.B. Arendall III, P.I.W. de Bakker, J.M. Word, M.G. Prisant, J.S. Richardson & D.C. Richardson (2002) Structure validation by  $C\alpha$  geometry:  $\phi/\psi$  and  $C\beta$  deviation. *Proteins: Structure, Function & Genetics*. **50**: 437-450



# Tem\_1s

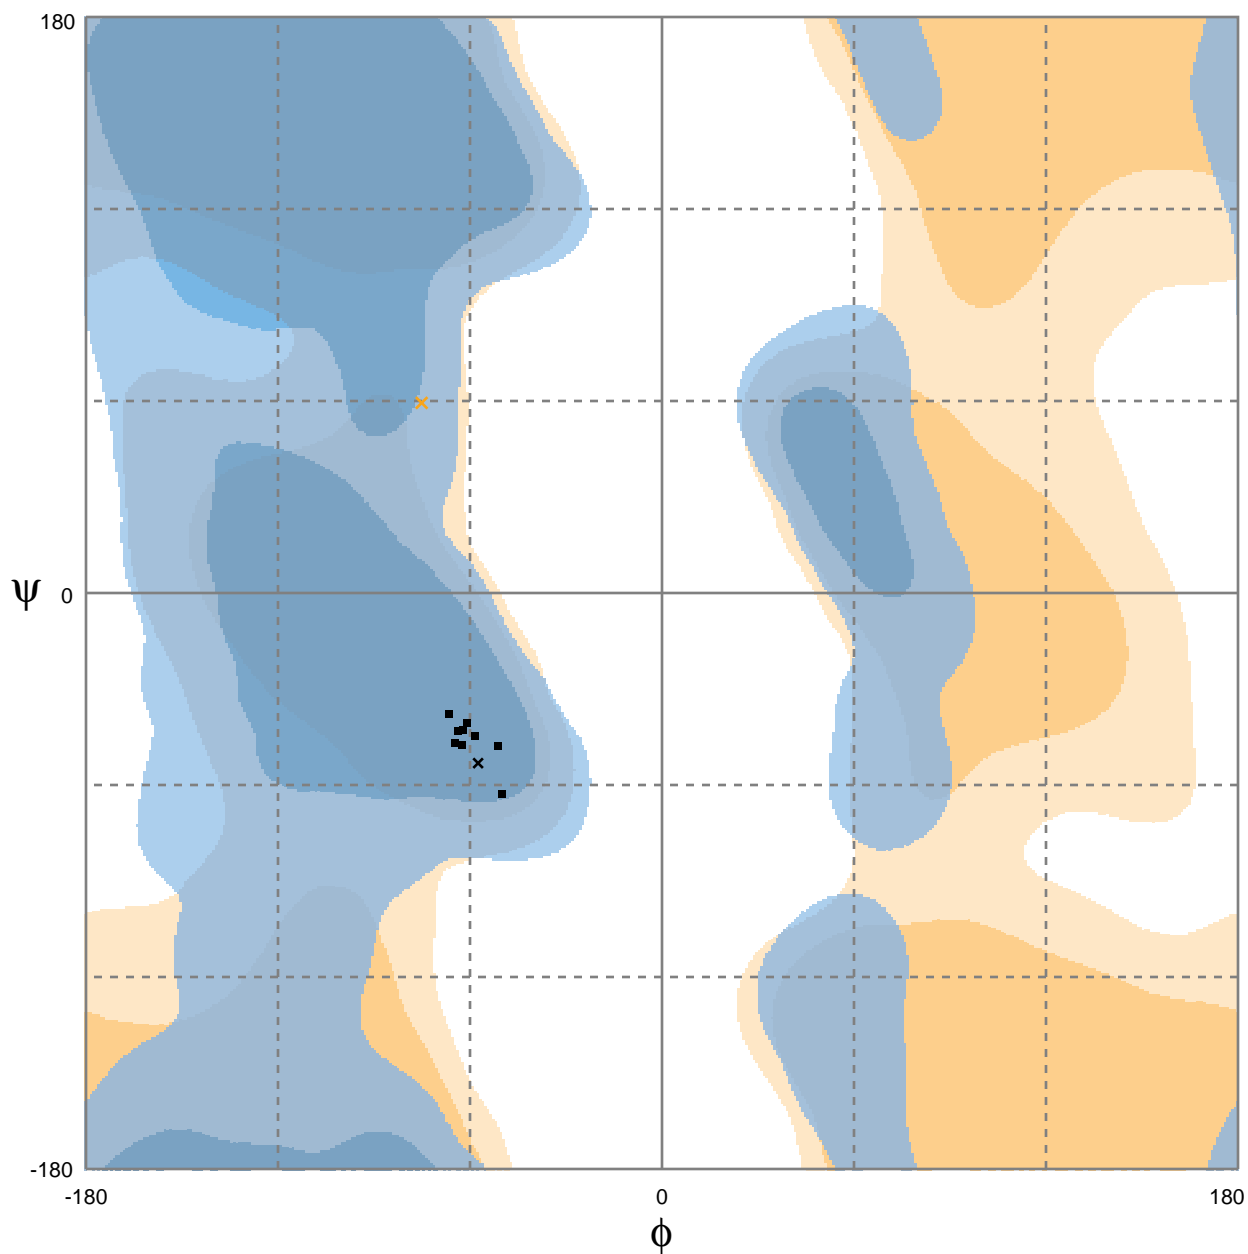

Number of residues in favoured region (~98.0% expected) : 10 (90.9%)  
Number of residues in allowed region (~2.0% expected) : 1 (9.1%)  
Number of residues in outlier region : 0 (0.0%)

RAMPAGE by Paul de Bakker and Simon Lovell available at <http://www-cryst.bioc.cam.ac.uk/rampage/>

Please cite: S.C. Lovell, I.W. Davis, W.B. Arendall III, P.I.W. de Bakker, J.M. Word, M.G. Prisant, J.S. Richardson & D.C. Richardson (2002) Structure validation by C $\alpha$  geometry:  $\phi/\psi$  and C $\beta$  deviation. *Proteins: Structure, Function & Genetics* **50**: 437-450

# Tem\_1ska

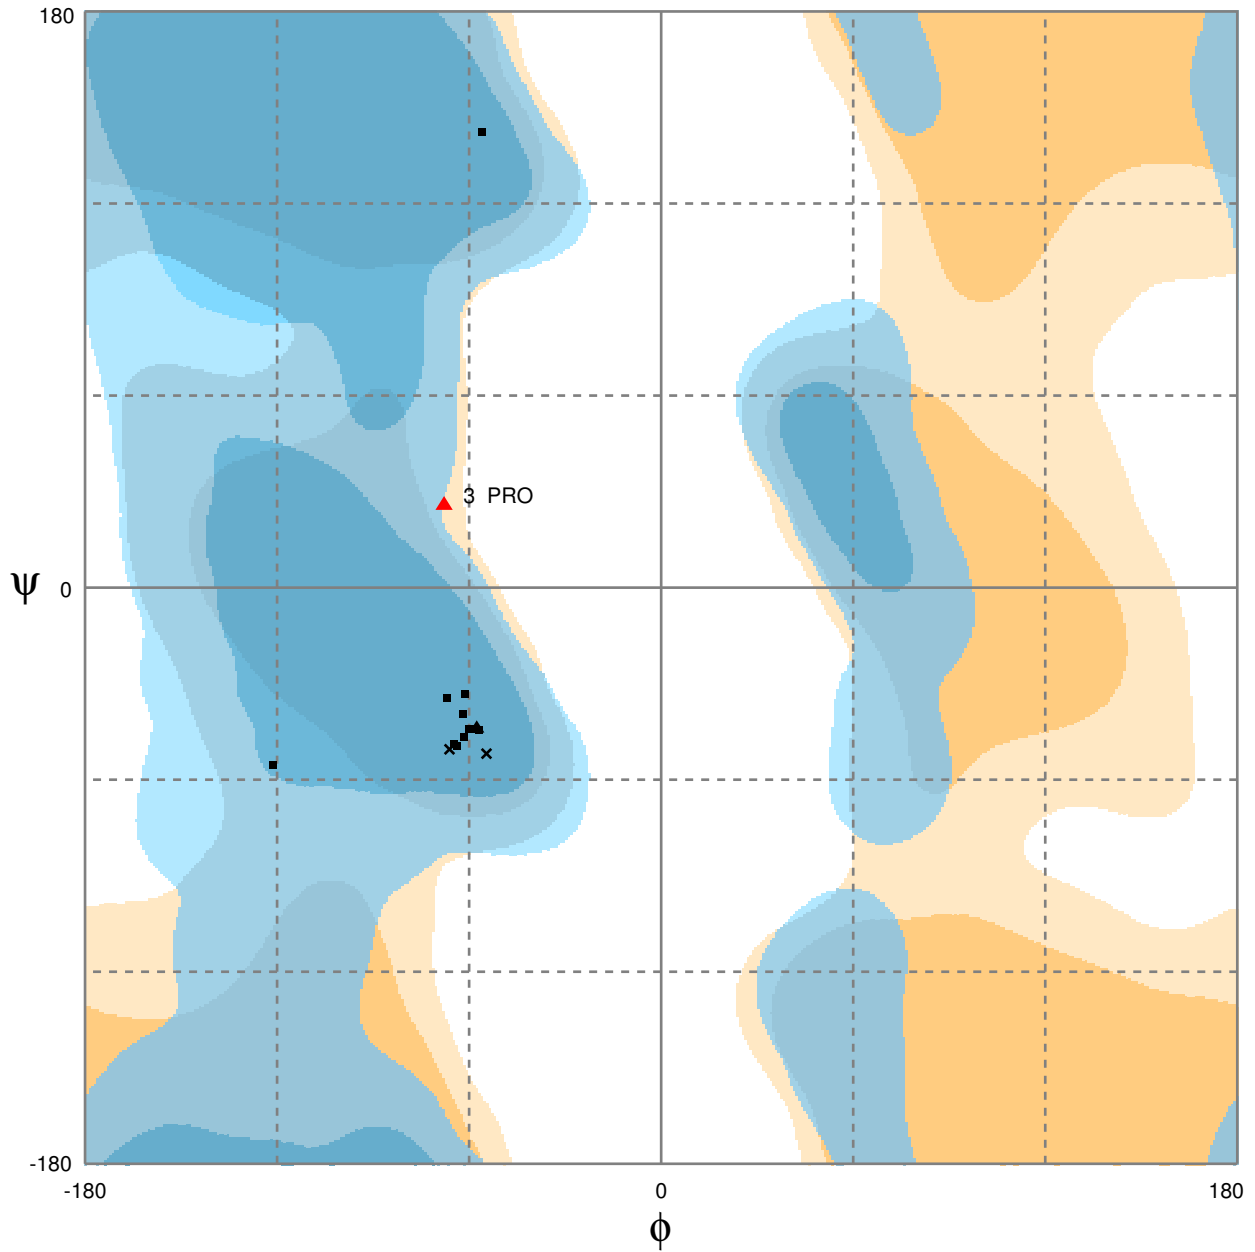

|                                                         |              |
|---------------------------------------------------------|--------------|
| Number of residues in favoured region (~98.0% expected) | : 14 (93.3%) |
| Number of residues in allowed region (~2.0% expected)   | : 0 (0.0%)   |
| Number of residues in outlier region                    | : 1 (6.7%)   |

RAMPAGE by Paul de Bakker and Simon Lovell available at <http://www-cryst.bioc.cam.ac.uk/rampage/>

Please cite: S.C. Lovell, I.W. Davis, W.B. Arendall III, P.I.W. de Bakker, J.M. Word, M.G. Prisant, J.S. Richardson & D.C. Richardson (2002) Structure validation by  $C\alpha$  geometry:  $\phi/\psi$  and  $C\beta$  deviation. *Proteins: Structure, Function & Genetics*. **50**: 437-450

# Tem\_1spa

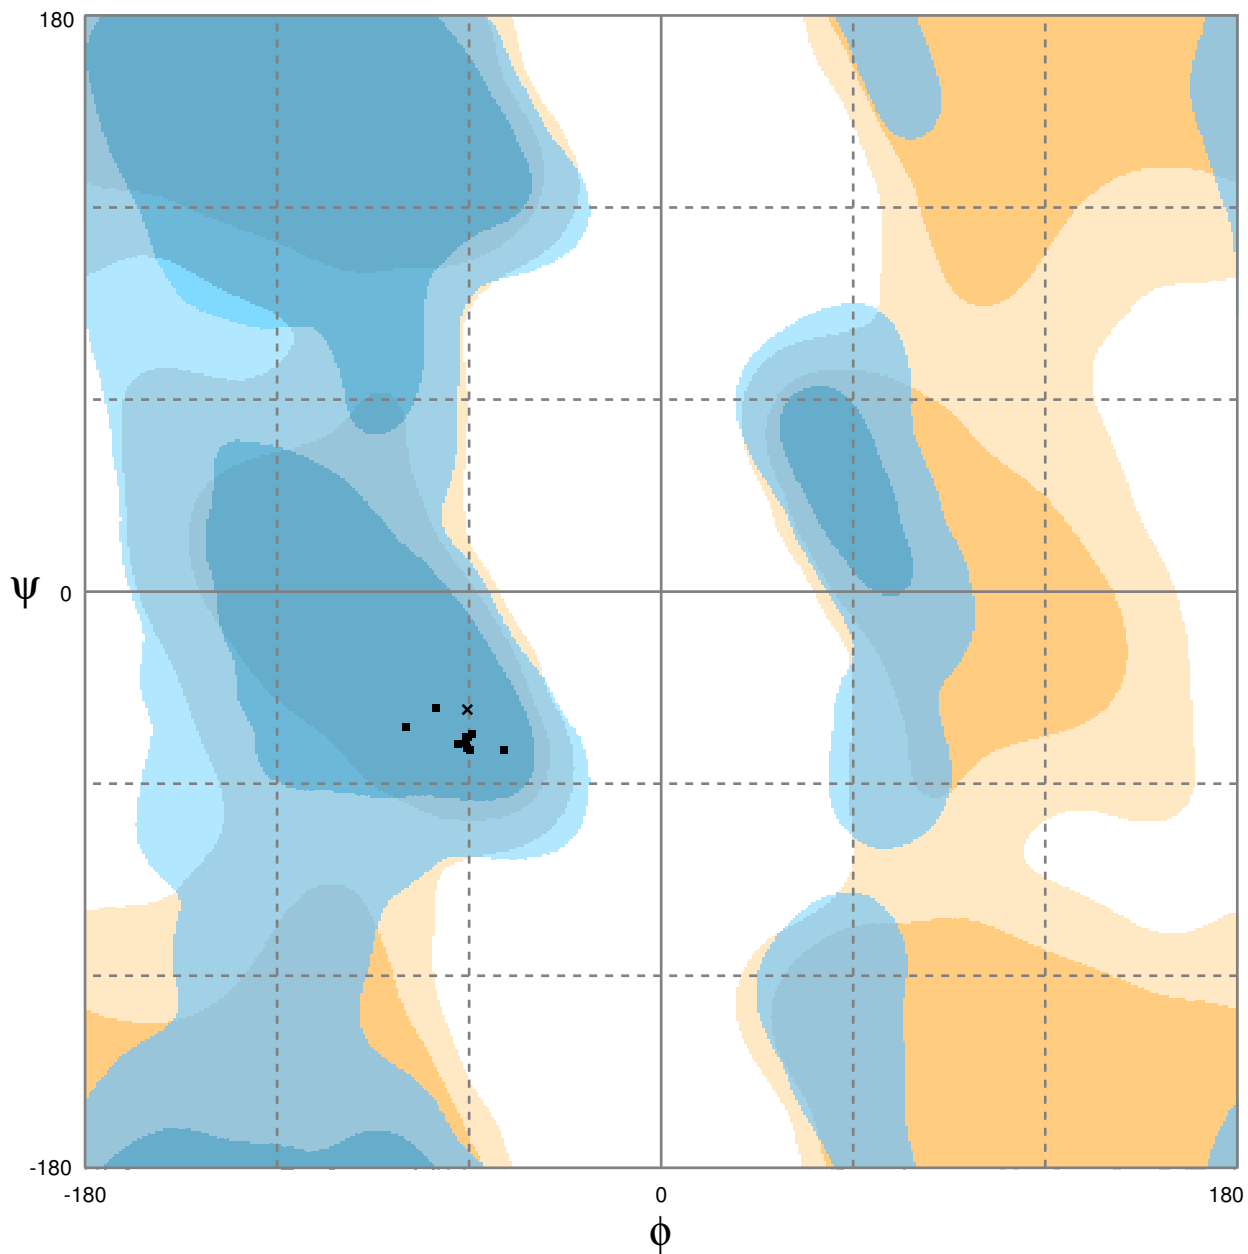

Number of residues in favoured region (~98.0% expected) : 11 (100.0%)  
Number of residues in allowed region (~2.0% expected) : 0 (0.0%)  
Number of residues in outlier region : 0 (0.0%)

RAMPAGE by Paul de Bakker and Simon Lovell available at <http://www-cryst.bioc.cam.ac.uk/rampage/>

Please cite: S.C. Lovell, I.W. Davis, W.B. Arendall III, P.I.W. de Bakker, J.M. Word, M.G. Prisant, J.S. Richardson & D.C. Richardson (2002) Structure validation by  $C\alpha$  geometry:  $\phi/\psi$  and  $C\beta$  deviation. *Proteins: Structure, Function & Genetics*. **50**: 437-450

# Tem\_1spb

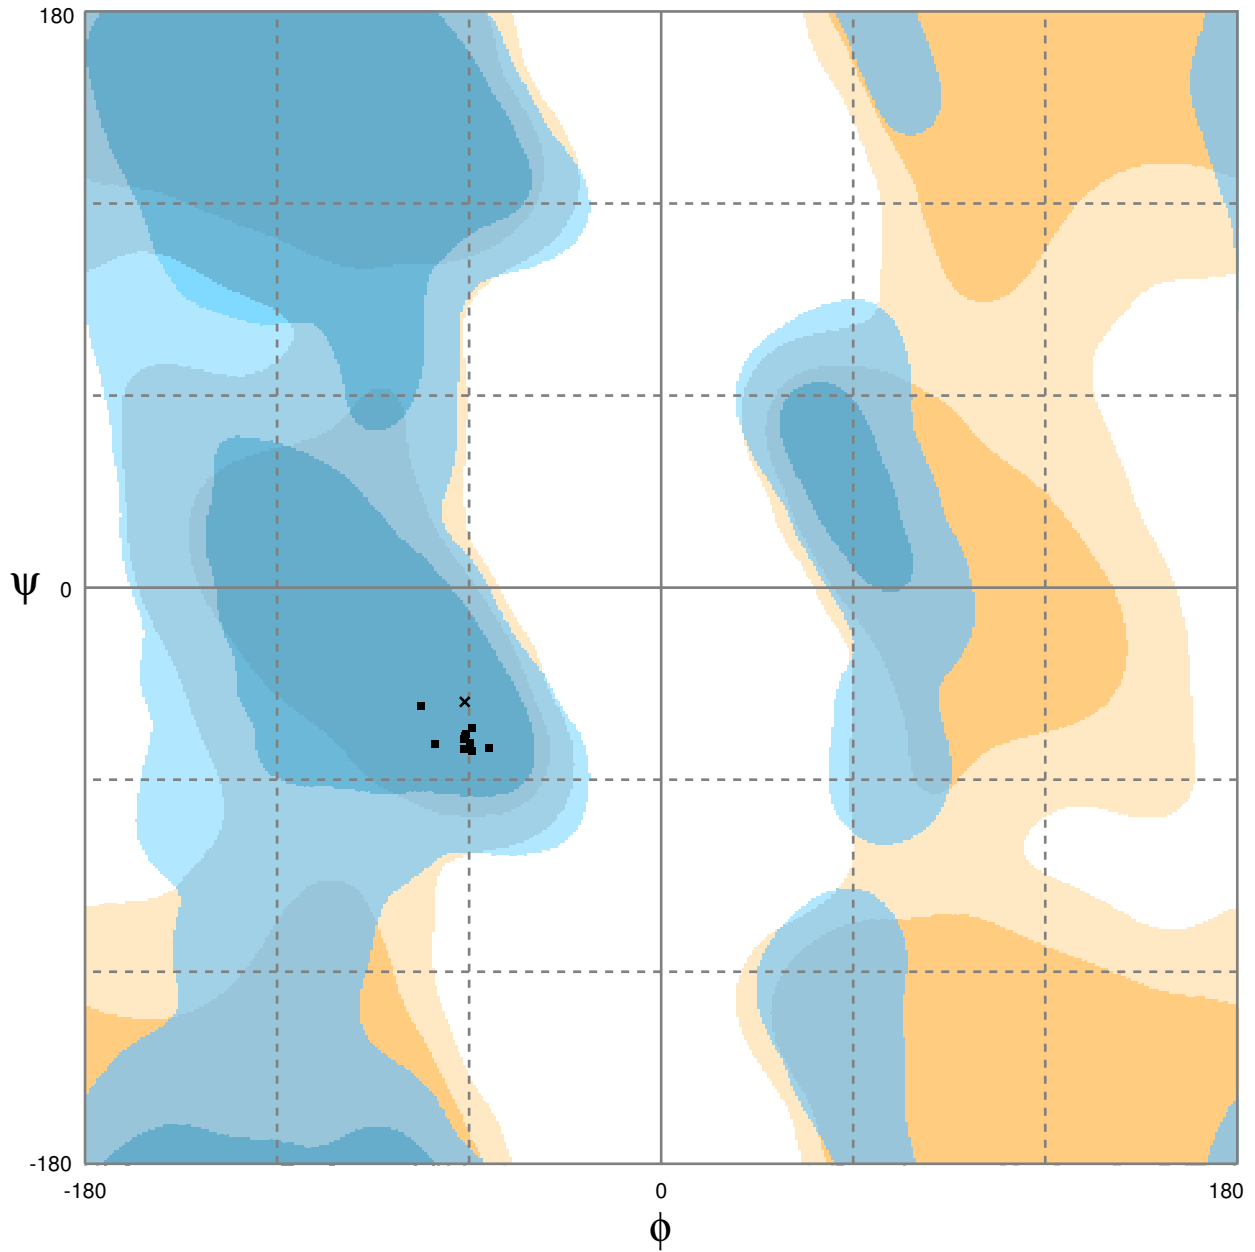

|                                                         |               |
|---------------------------------------------------------|---------------|
| Number of residues in favoured region (~98.0% expected) | : 11 (100.0%) |
| Number of residues in allowed region (~2.0% expected)   | : 0 (0.0%)    |
| Number of residues in outlier region                    | : 0 (0.0%)    |

RAMPAGE by Paul de Bakker and Simon Lovell available at <http://www-cryst.bioc.cam.ac.uk/rampage/>

Please cite: S.C. Lovell, I.W. Davis, W.B. Arendall III, P.I.W. de Bakker, J.M. Word, M.G. Prisant, J.S. Richardson & D.C. Richardson (2002) Structure validation by  $C\alpha$  geometry:  $\phi/\psi$  and  $C\beta$  deviation. *Proteins: Structure, Function & Genetics*. **50**: 437-450

# Tem\_1ta

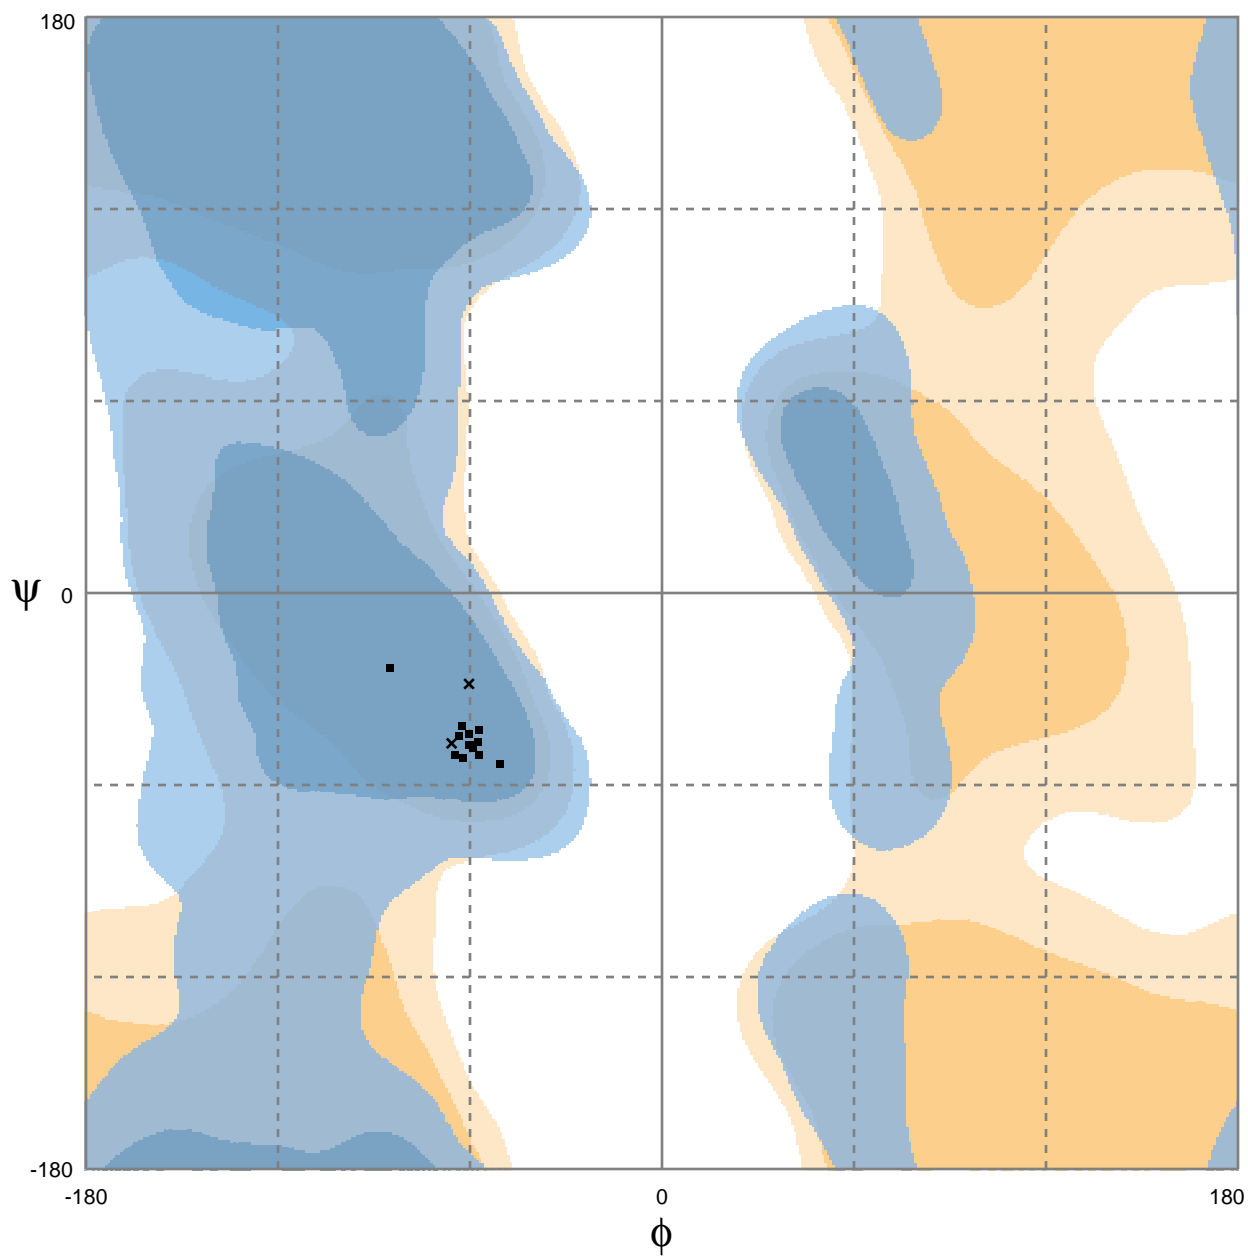

Number of residues in favoured region (~98.0% expected) : 15 (100.0%)  
Number of residues in allowed region (~2.0% expected) : 0 (0.0%)  
Number of residues in outlier region : 0 (0.0%)

RAMPAGE by Paul de Bakker and Simon Lovell available at <http://www-cryst.bioc.cam.ac.uk/rampage/>

Please cite: S.C. Lovell, I.W. Davis, W.B. Arendall III, P.I.W. de Bakker, J.M. Word, M.G. Prisant, J.S. Richardson & D.C. Richardson (2002) Structure validation by C $\alpha$  geometry:  $\phi/\psi$  and C $\beta$  deviation. *Proteins: Structure, Function & Genetics* **50**: 437-450

# Tem\_1tga

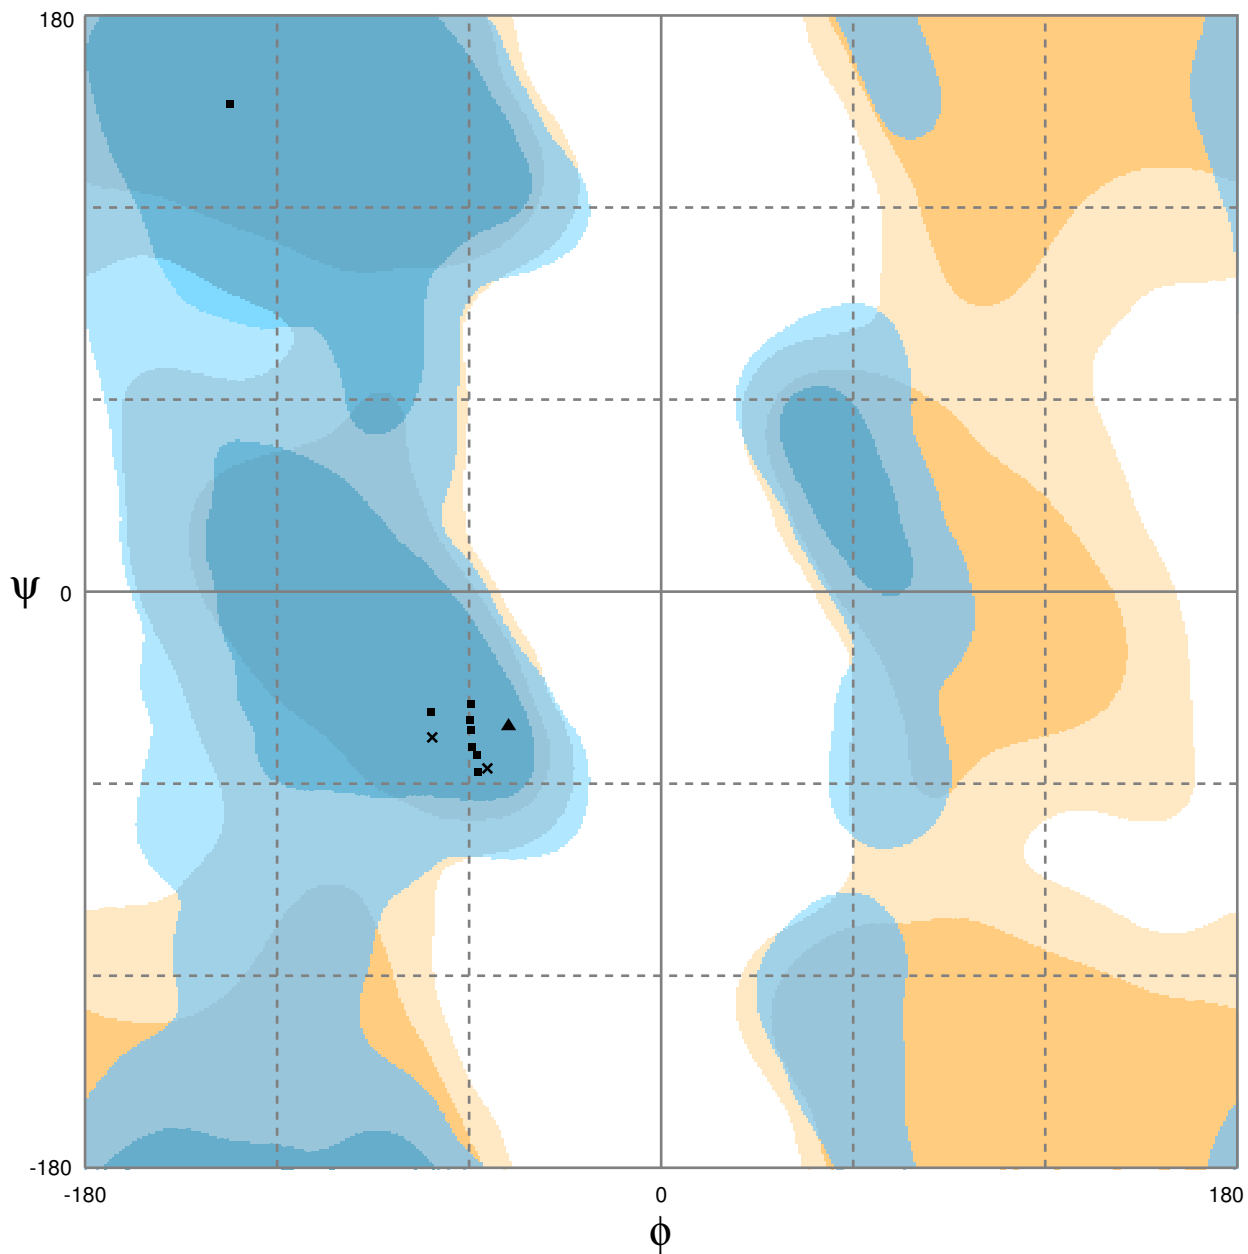

|                                                         |               |
|---------------------------------------------------------|---------------|
| Number of residues in favoured region (~98.0% expected) | : 11 (100.0%) |
| Number of residues in allowed region (~2.0% expected)   | : 0 (0.0%)    |
| Number of residues in outlier region                    | : 0 (0.0%)    |

RAMPAGE by Paul de Bakker and Simon Lovell available at <http://www-cryst.bioc.cam.ac.uk/rampage/>

Please cite: S.C. Lovell, I.W. Davis, W.B. Arendall III, P.I.W. de Bakker, J.M. Word, M.G. Prisant, J.S. Richardson & D.C. Richardson (2002) Structure validation by  $C\alpha$  geometry:  $\phi/\psi$  and  $C\beta$  deviation. *Proteins: Structure, Function & Genetics*. **50**: 437-450

# Tem\_1tgb

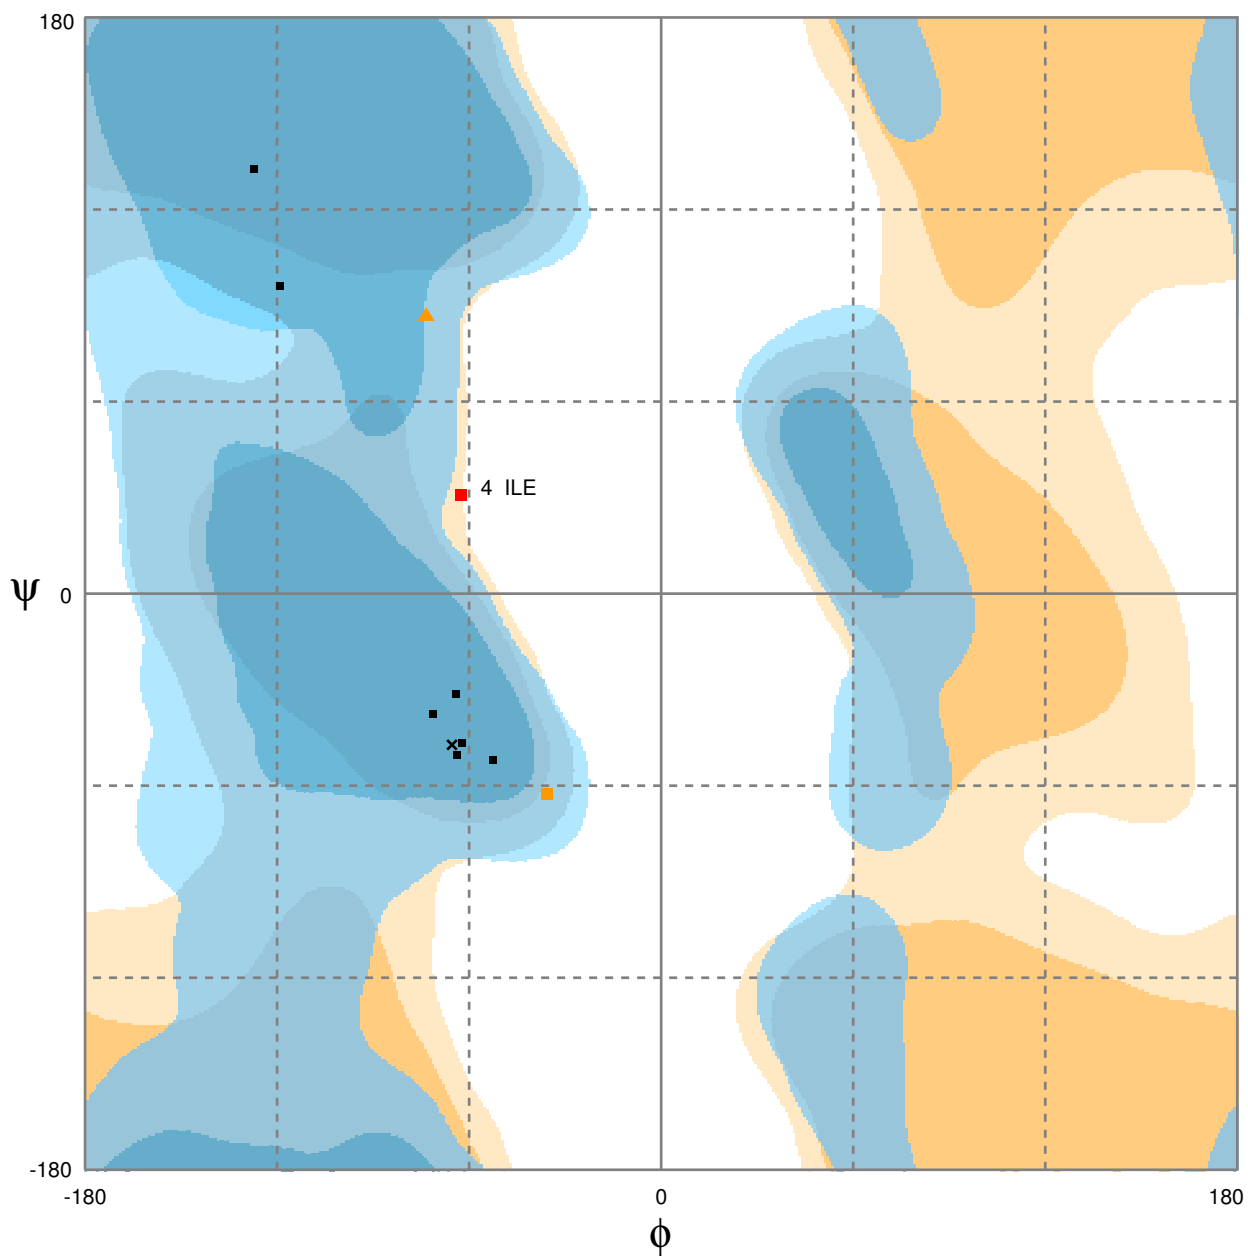

Number of residues in favoured region (~98.0% expected) : 8 (72.7%)  
 Number of residues in allowed region (~2.0% expected) : 2 (18.2%)  
 Number of residues in outlier region : 1 (9.1%)

RAMPAGE by Paul de Bakker and Simon Lovell available at <http://www-cryst.bioc.cam.ac.uk/rampage/>

Please cite: S.C. Lovell, I.W. Davis, W.B. Arendall III, P.I.W. de Bakker, J.M. Word, M.G. Prisant, J.S. Richardson & D.C. Richardson (2002) Structure validation by  $C\alpha$  geometry:  $\phi/\psi$  and  $C\beta$  deviation. *Proteins: Structure, Function & Genetics*. **50**: 437-450

# Tem\_1tgc

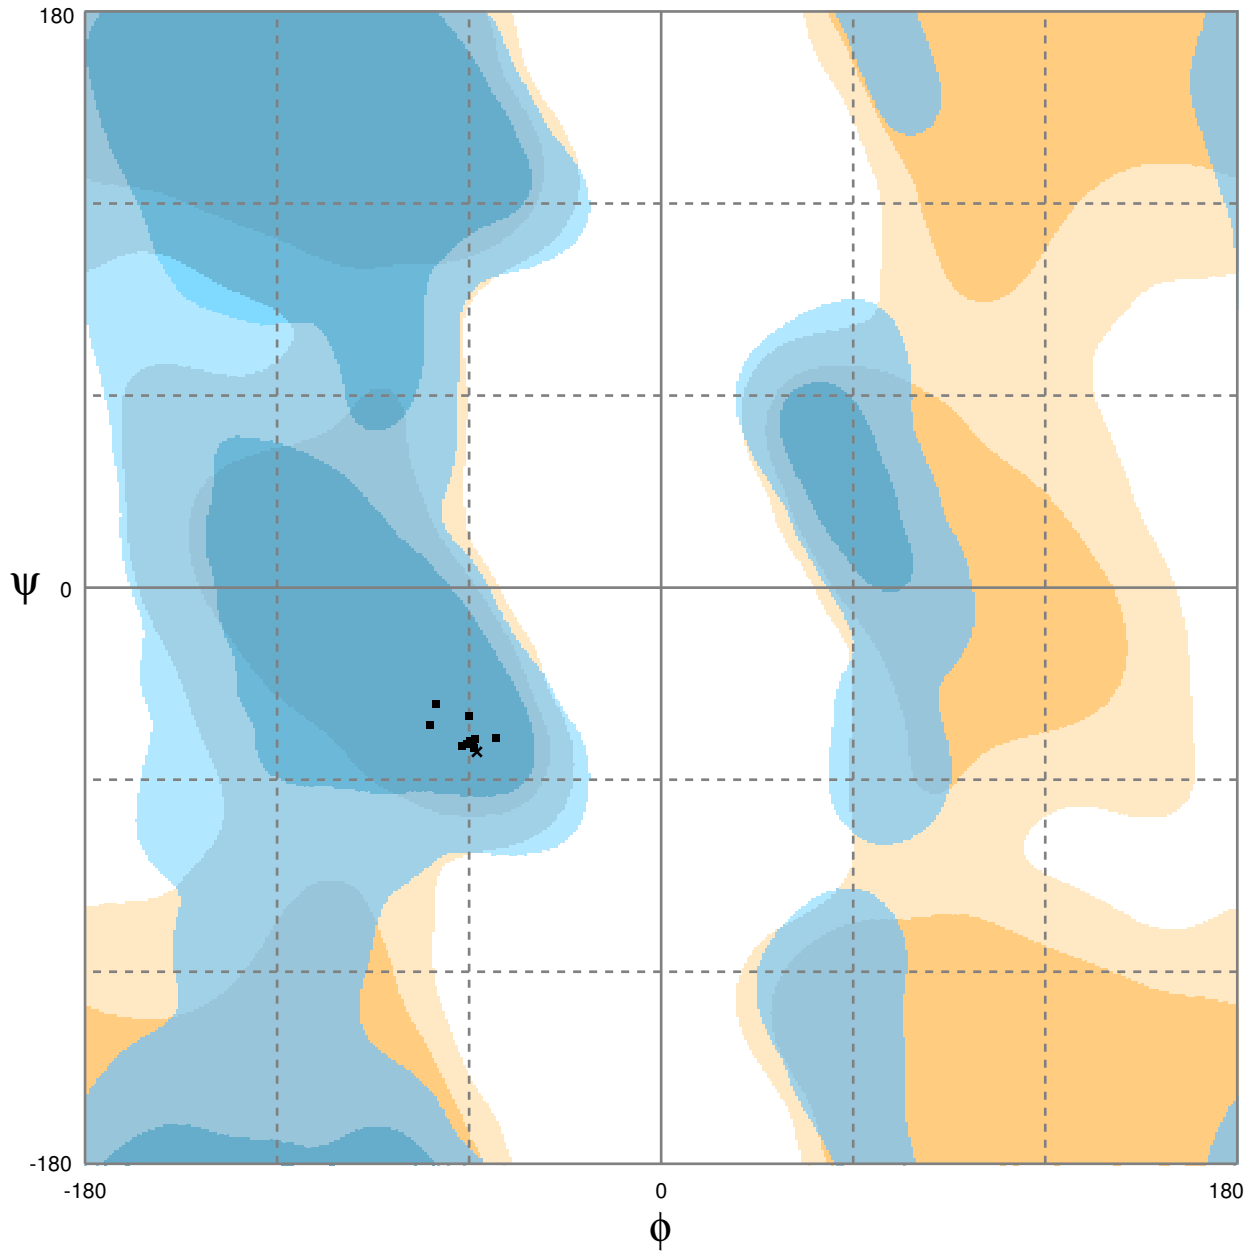

|                                                         |               |
|---------------------------------------------------------|---------------|
| Number of residues in favoured region (~98.0% expected) | : 11 (100.0%) |
| Number of residues in allowed region (~2.0% expected)   | : 0 (0.0%)    |
| Number of residues in outlier region                    | : 0 (0.0%)    |

RAMPAGE by Paul de Bakker and Simon Lovell available at <http://www-cryst.bioc.cam.ac.uk/rampage/>

Please cite: S.C. Lovell, I.W. Davis, W.B. Arendall III, P.I.W. de Bakker, J.M. Word, M.G. Prisant, J.S. Richardson & D.C. Richardson (2002) Structure validation by  $C\alpha$  geometry:  $\phi/\psi$  and  $C\beta$  deviation. *Proteins: Structure, Function & Genetics*. **50**: 437-450



# Tem\_1tsa

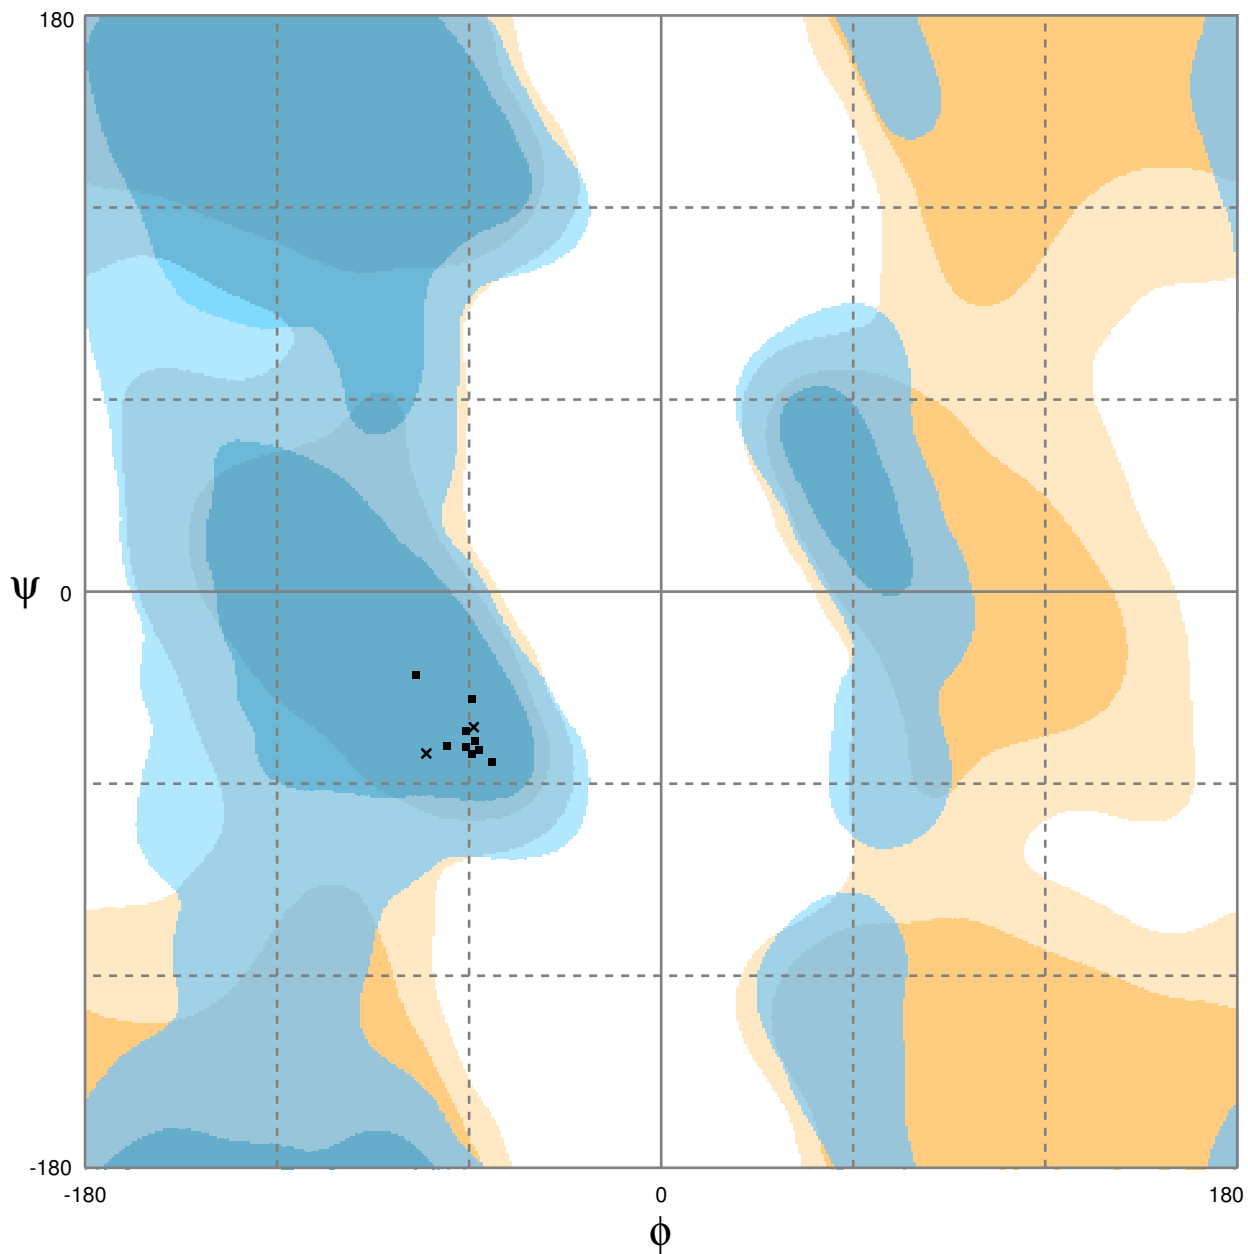

|                                                         |               |
|---------------------------------------------------------|---------------|
| Number of residues in favoured region (~98.0% expected) | : 11 (100.0%) |
| Number of residues in allowed region (~2.0% expected)   | : 0 (0.0%)    |
| Number of residues in outlier region                    | : 0 (0.0%)    |

RAMPAGE by Paul de Bakker and Simon Lovell available at <http://www-cryst.bioc.cam.ac.uk/rampage/>

Please cite: S.C. Lovell, I.W. Davis, W.B. Arendall III, P.I.W. de Bakker, J.M. Word, M.G. Prisant, J.S. Richardson & D.C. Richardson (2002) Structure validation by  $C\alpha$  geometry:  $\phi/\psi$  and  $C\beta$  deviation. *Proteins: Structure, Function & Genetics*. **50**: 437-450

# Tem\_1tsc

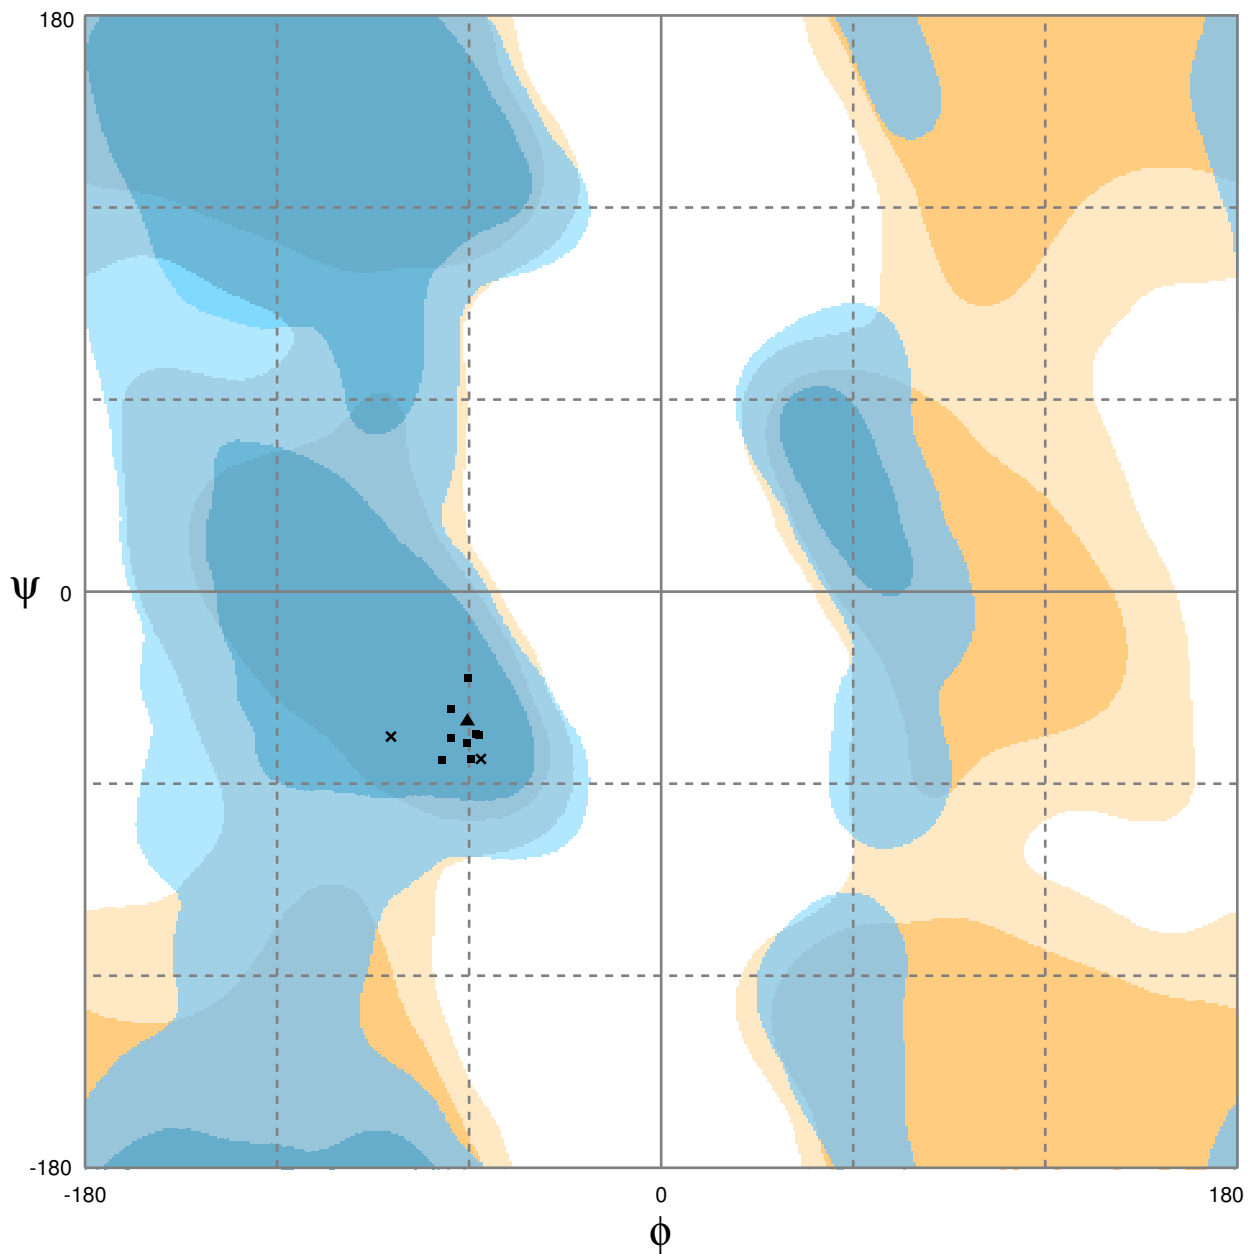

|                                                         |               |
|---------------------------------------------------------|---------------|
| Number of residues in favoured region (~98.0% expected) | : 11 (100.0%) |
| Number of residues in allowed region (~2.0% expected)   | : 0 (0.0%)    |
| Number of residues in outlier region                    | : 0 (0.0%)    |

RAMPAGE by Paul de Bakker and Simon Lovell available at <http://www-cryst.bioc.cam.ac.uk/rampage/>

Please cite: S.C. Lovell, I.W. Davis, W.B. Arendall III, P.I.W. de Bakker, J.M. Word, M.G. Prisant, J.S. Richardson & D.C. Richardson (2002) Structure validation by  $C\alpha$  geometry:  $\phi/\psi$  and  $C\beta$  deviation. *Proteins: Structure, Function & Genetics*. **50**: 437-450

# Tem\_1va

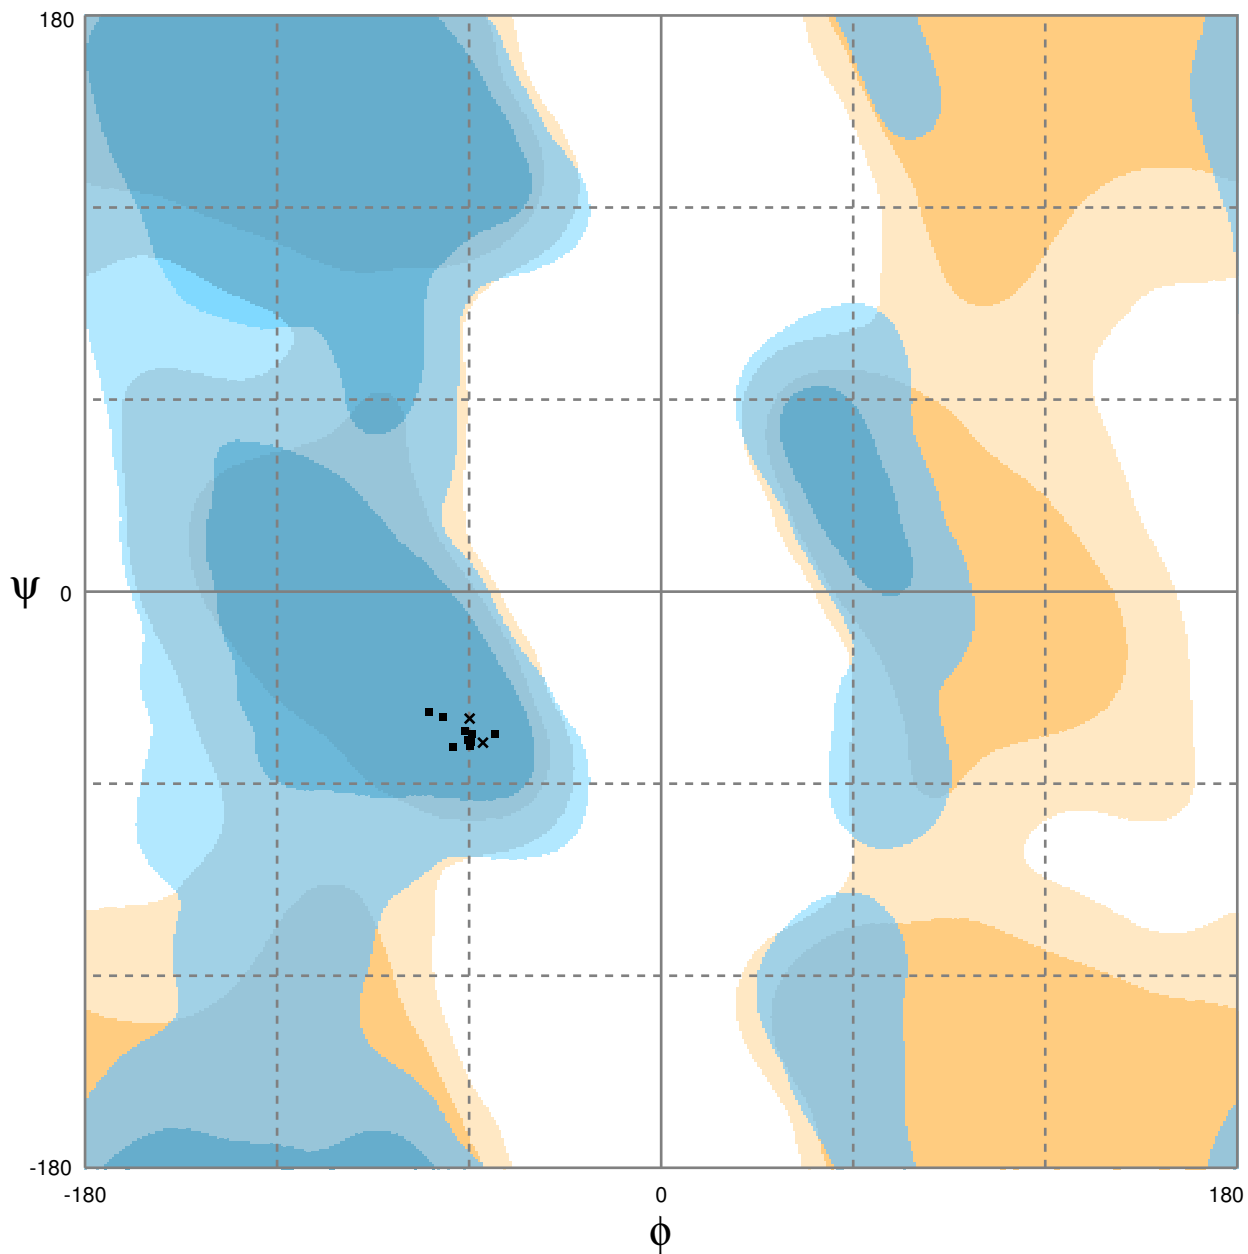

|                                                         |               |
|---------------------------------------------------------|---------------|
| Number of residues in favoured region (~98.0% expected) | : 11 (100.0%) |
| Number of residues in allowed region (~2.0% expected)   | : 0 (0.0%)    |
| Number of residues in outlier region                    | : 0 (0.0%)    |

RAMPAGE by Paul de Bakker and Simon Lovell available at <http://www-cryst.bioc.cam.ac.uk/rampage/>

Please cite: S.C. Lovell, I.W. Davis, W.B. Arendall III, P.I.W. de Bakker, J.M. Word, M.G. Prisant, J.S. Richardson & D.C. Richardson (2002) Structure validation by  $C\alpha$  geometry:  $\phi/\psi$  and  $C\beta$  deviation. *Proteins: Structure, Function & Genetics*. **50**: 437-450

# Tem\_1vb

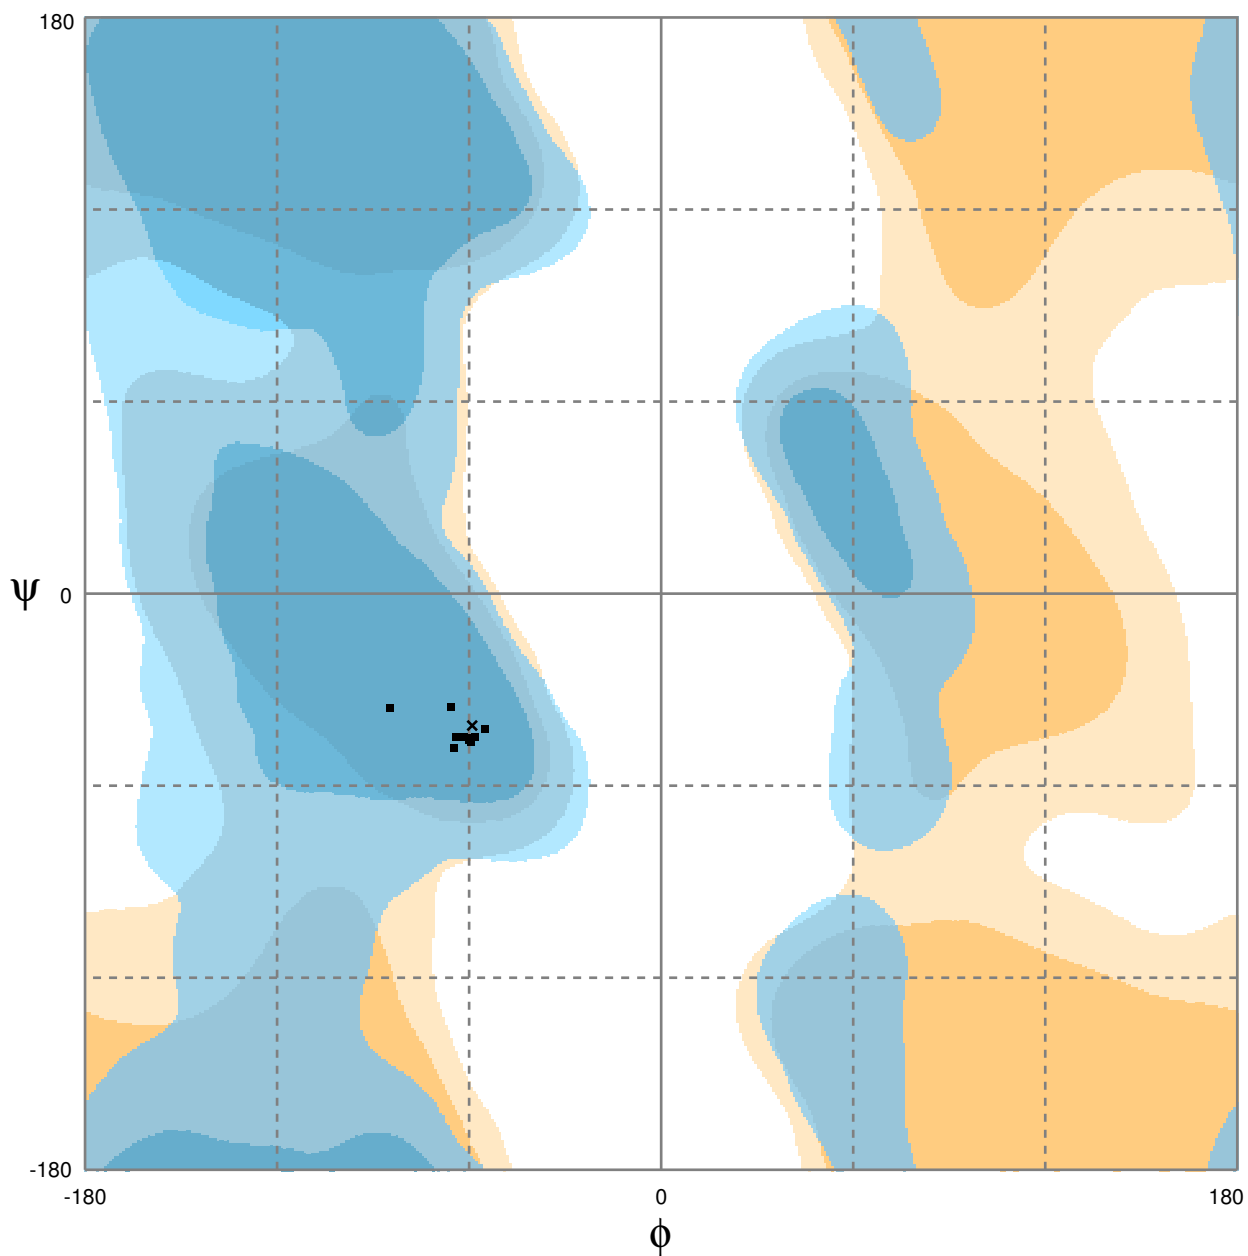

|                                                         |               |
|---------------------------------------------------------|---------------|
| Number of residues in favoured region (~98.0% expected) | : 11 (100.0%) |
| Number of residues in allowed region (~2.0% expected)   | : 0 (0.0%)    |
| Number of residues in outlier region                    | : 0 (0.0%)    |

RAMPAGE by Paul de Bakker and Simon Lovell available at <http://www-cryst.bioc.cam.ac.uk/rampage/>

Please cite: S.C. Lovell, I.W. Davis, W.B. Arendall III, P.I.W. de Bakker, J.M. Word, M.G. Prisant, J.S. Richardson & D.C. Richardson (2002) Structure validation by  $C\alpha$  geometry:  $\phi/\psi$  and  $C\beta$  deviation. *Proteins: Structure, Function & Genetics*. **50**: 437-450

# Tem\_1vc

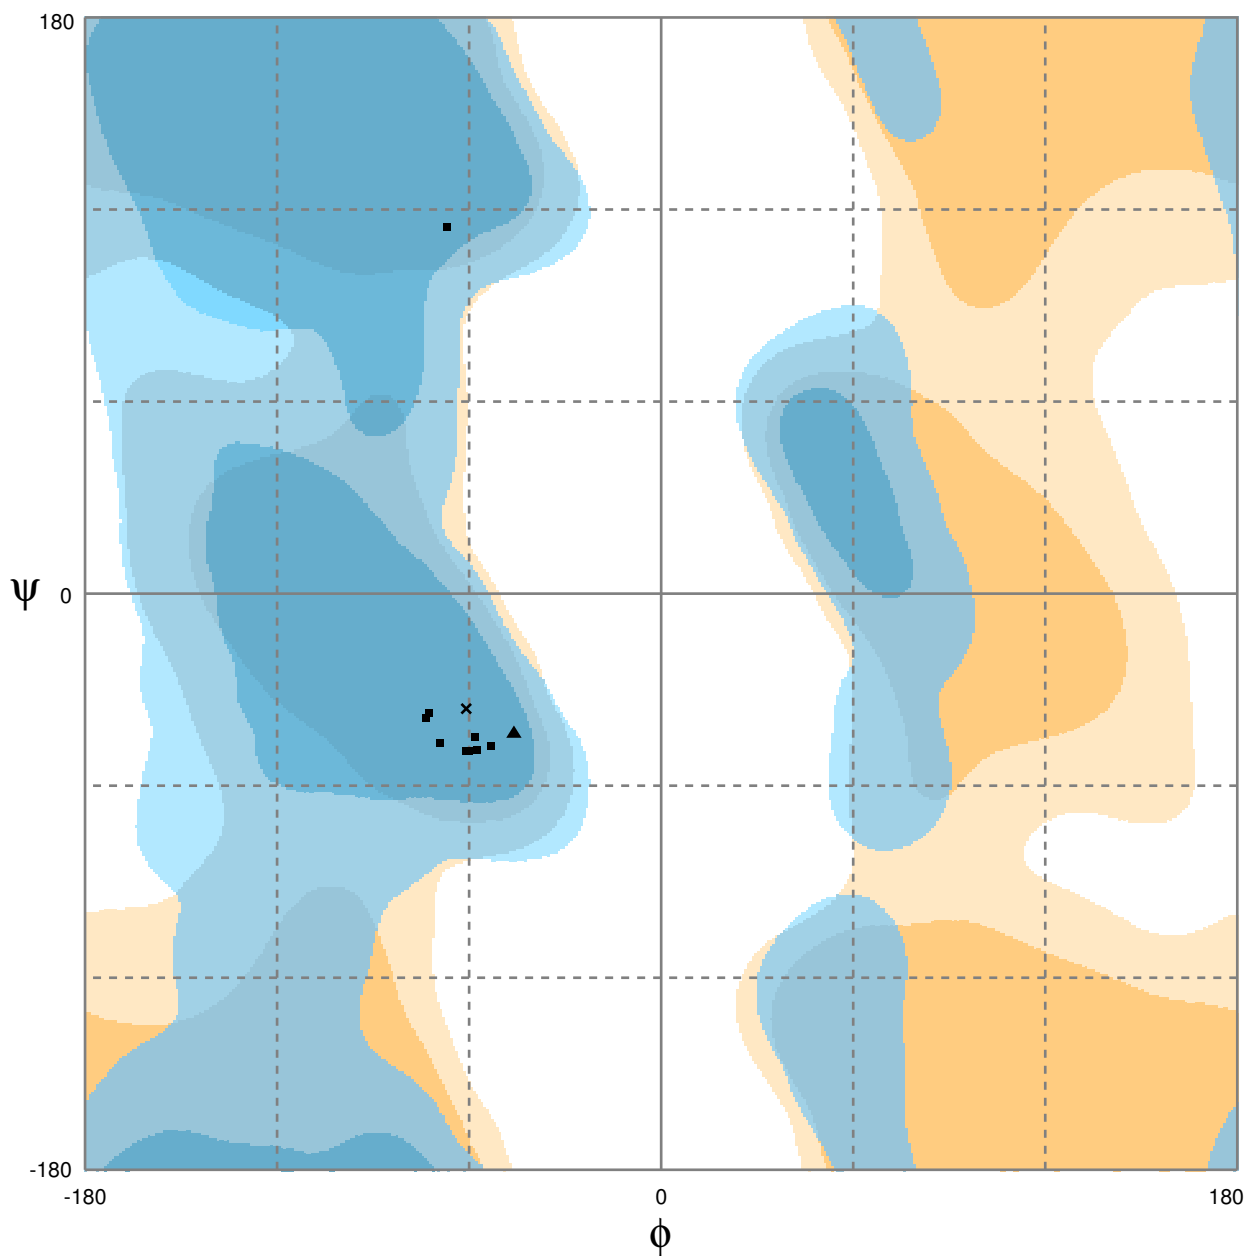

Number of residues in favoured region (~98.0% expected) : 11 (100.0%)  
Number of residues in allowed region (~2.0% expected) : 0 (0.0%)  
Number of residues in outlier region : 0 (0.0%)

RAMPAGE by Paul de Bakker and Simon Lovell available at <http://www-cryst.bioc.cam.ac.uk/rampage/>

Please cite: S.C. Lovell, I.W. Davis, W.B. Arendall III, P.I.W. de Bakker, J.M. Word, M.G. Prisant, J.S. Richardson & D.C. Richardson (2002) Structure validation by  $C\alpha$  geometry:  $\phi/\psi$  and  $C\beta$  deviation. *Proteins: Structure, Function & Genetics*. **50**: 437-450

# Tem\_1ve

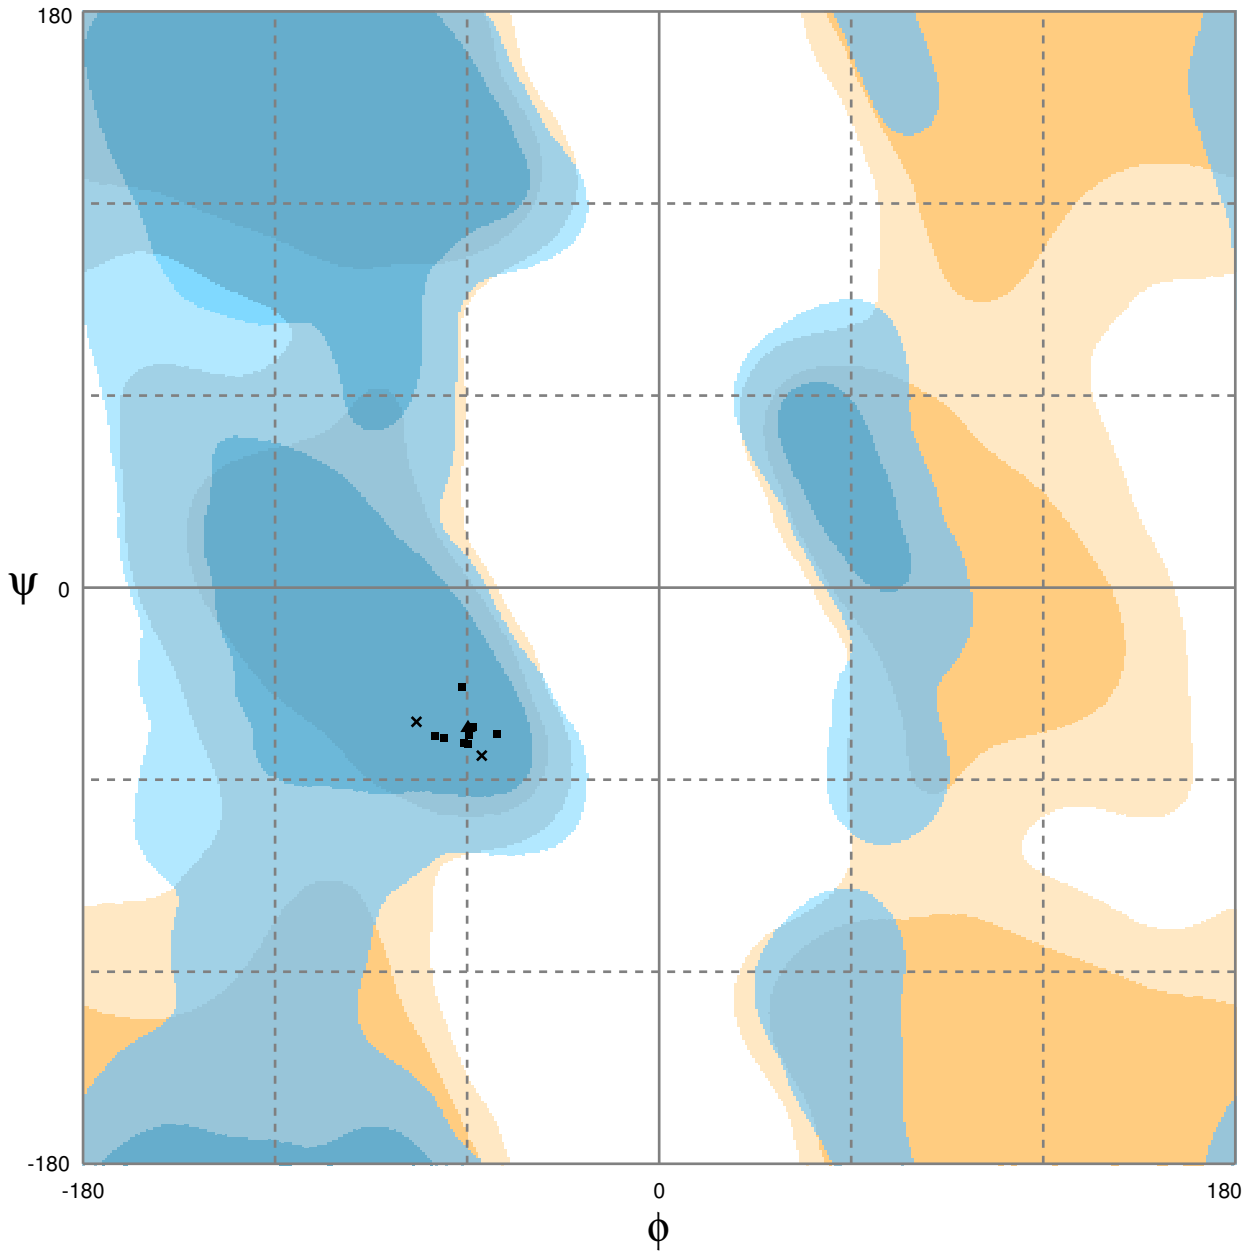

|                                                         |               |
|---------------------------------------------------------|---------------|
| Number of residues in favoured region (~98.0% expected) | : 11 (100.0%) |
| Number of residues in allowed region (~2.0% expected)   | : 0 (0.0%)    |
| Number of residues in outlier region                    | : 0 (0.0%)    |

RAMPAGE by Paul de Bakker and Simon Lovell available at <http://www-cryst.bioc.cam.ac.uk/rampage/>

Please cite: S.C. Lovell, I.W. Davis, W.B. Arendall III, P.I.W. de Bakker, J.M. Word, M.G. Prisant, J.S. Richardson & D.C. Richardson (2002) Structure validation by  $C\alpha$  geometry:  $\phi/\psi$  and  $C\beta$  deviation. *Proteins: Structure, Function & Genetics*. **50**: 437-450

# Tem\_aj8

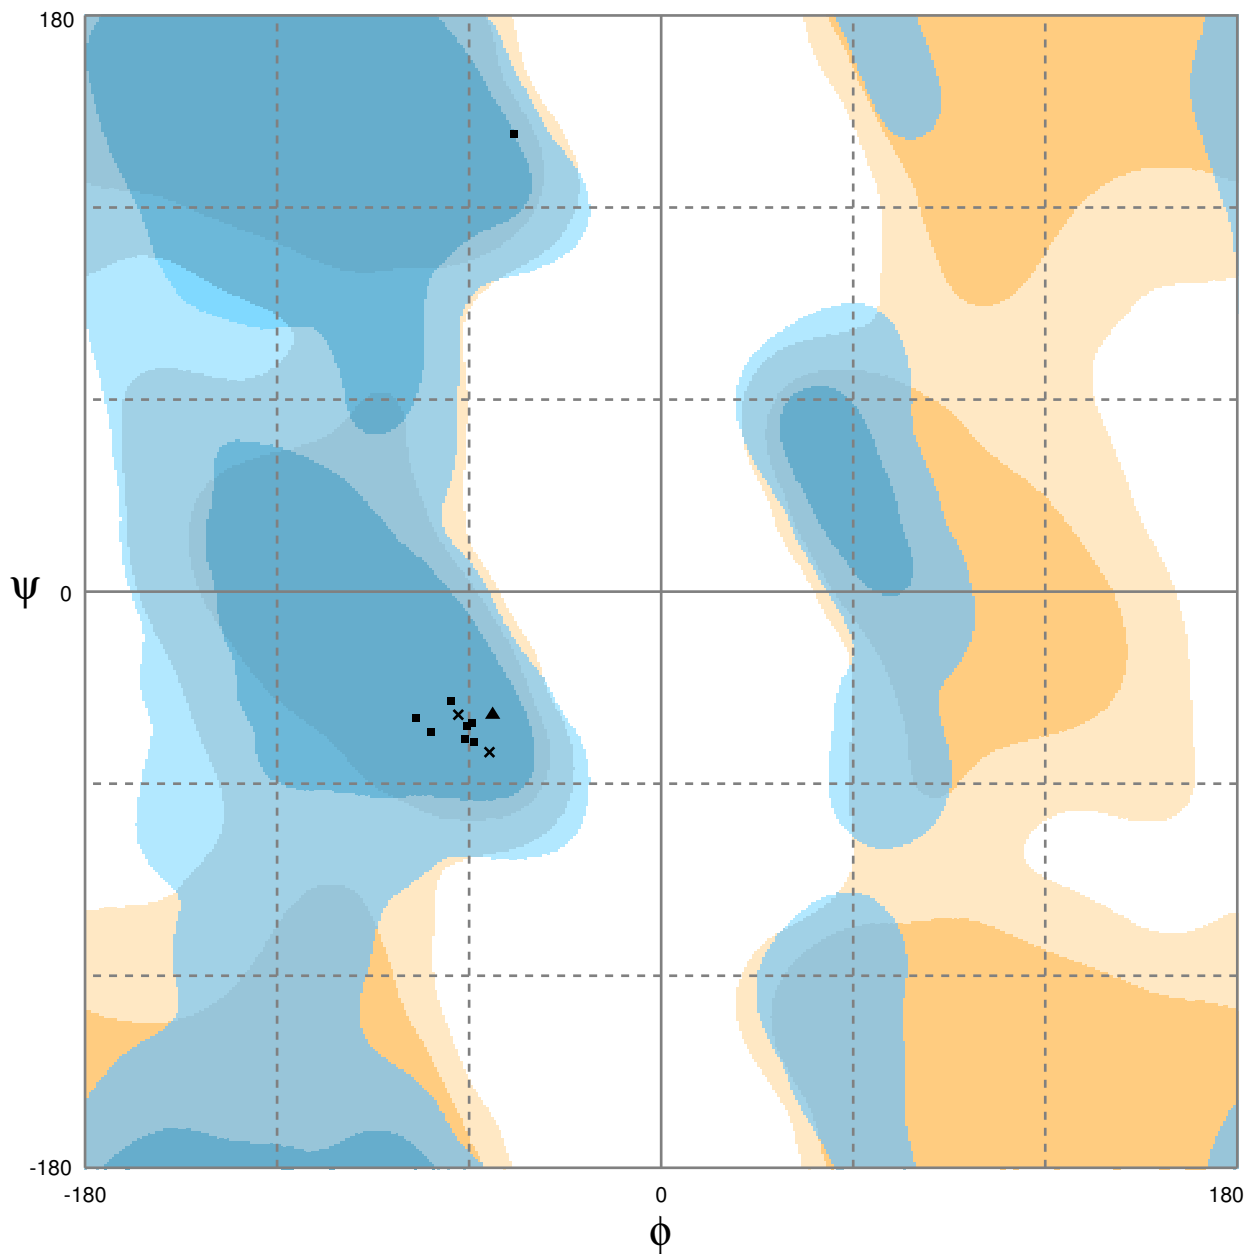

|                                                         |               |
|---------------------------------------------------------|---------------|
| Number of residues in favoured region (~98.0% expected) | : 11 (100.0%) |
| Number of residues in allowed region (~2.0% expected)   | : 0 (0.0%)    |
| Number of residues in outlier region                    | : 0 (0.0%)    |

RAMPAGE by Paul de Bakker and Simon Lovell available at <http://www-cryst.bioc.cam.ac.uk/rampage/>

Please cite: S.C. Lovell, I.W. Davis, W.B. Arendall III, P.I.W. de Bakker, J.M. Word, M.G. Prisant, J.S. Richardson & D.C. Richardson (2002) Structure validation by  $C\alpha$  geometry:  $\phi/\psi$  and  $C\beta$  deviation. *Proteins: Structure, Function & Genetics*. **50**: 437-450

# Tem\_ala

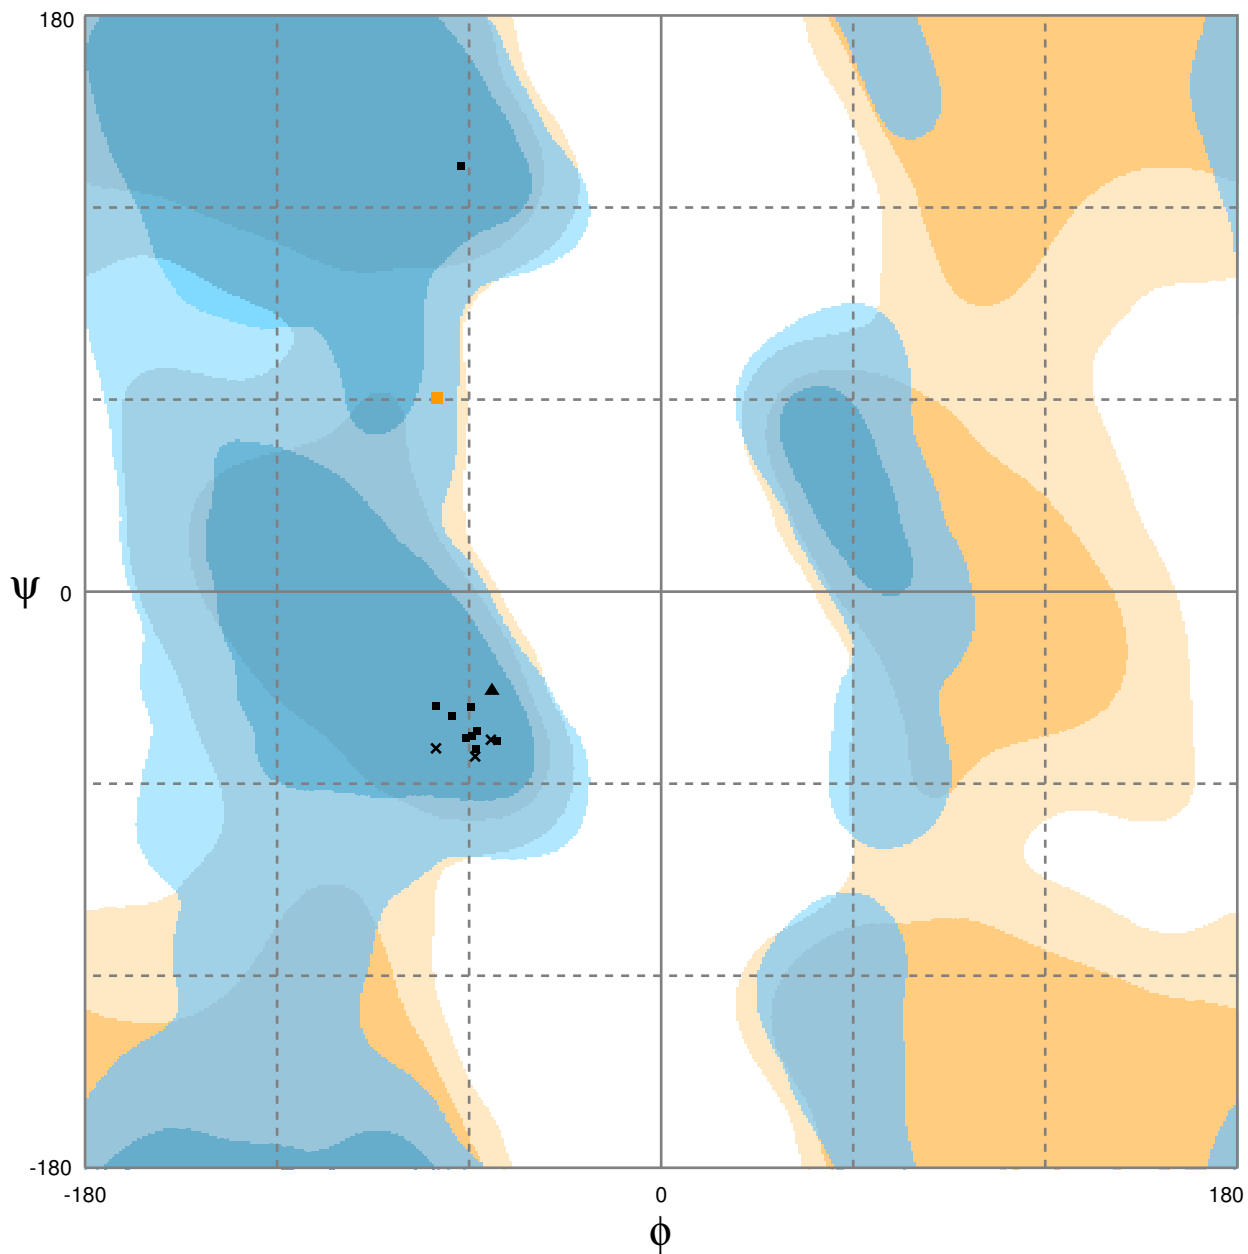

|     |                                  |     |                                 |
|-----|----------------------------------|-----|---------------------------------|
| ■ ▲ | General/Pre-Pro/Proline Favoured | ■ ▲ | General/Pre-Pro/Proline Allowed |
| ×   | Glycine Favoured                 | ×   | Glycine Allowed                 |

|                                                         |              |
|---------------------------------------------------------|--------------|
| Number of residues in favoured region (~98.0% expected) | : 13 (92.9%) |
| Number of residues in allowed region (~2.0% expected)   | : 1 (7.1%)   |
| Number of residues in outlier region                    | : 0 (0.0%)   |

RAMPAGE by Paul de Bakker and Simon Lovell available at <http://www-cryst.bioc.cam.ac.uk/rampage/>

Please cite: S.C. Lovell, I.W. Davis, W.B. Arendall III, P.I.W. de Bakker, J.M. Word, M.G. Prisant, J.S. Richardson & D.C. Richardson (2002) Structure validation by  $C\alpha$  geometry:  $\phi/\psi$  and  $C\beta$  deviation. *Proteins: Structure, Function & Genetics*. **50**: 437-450



# Tem\_ald

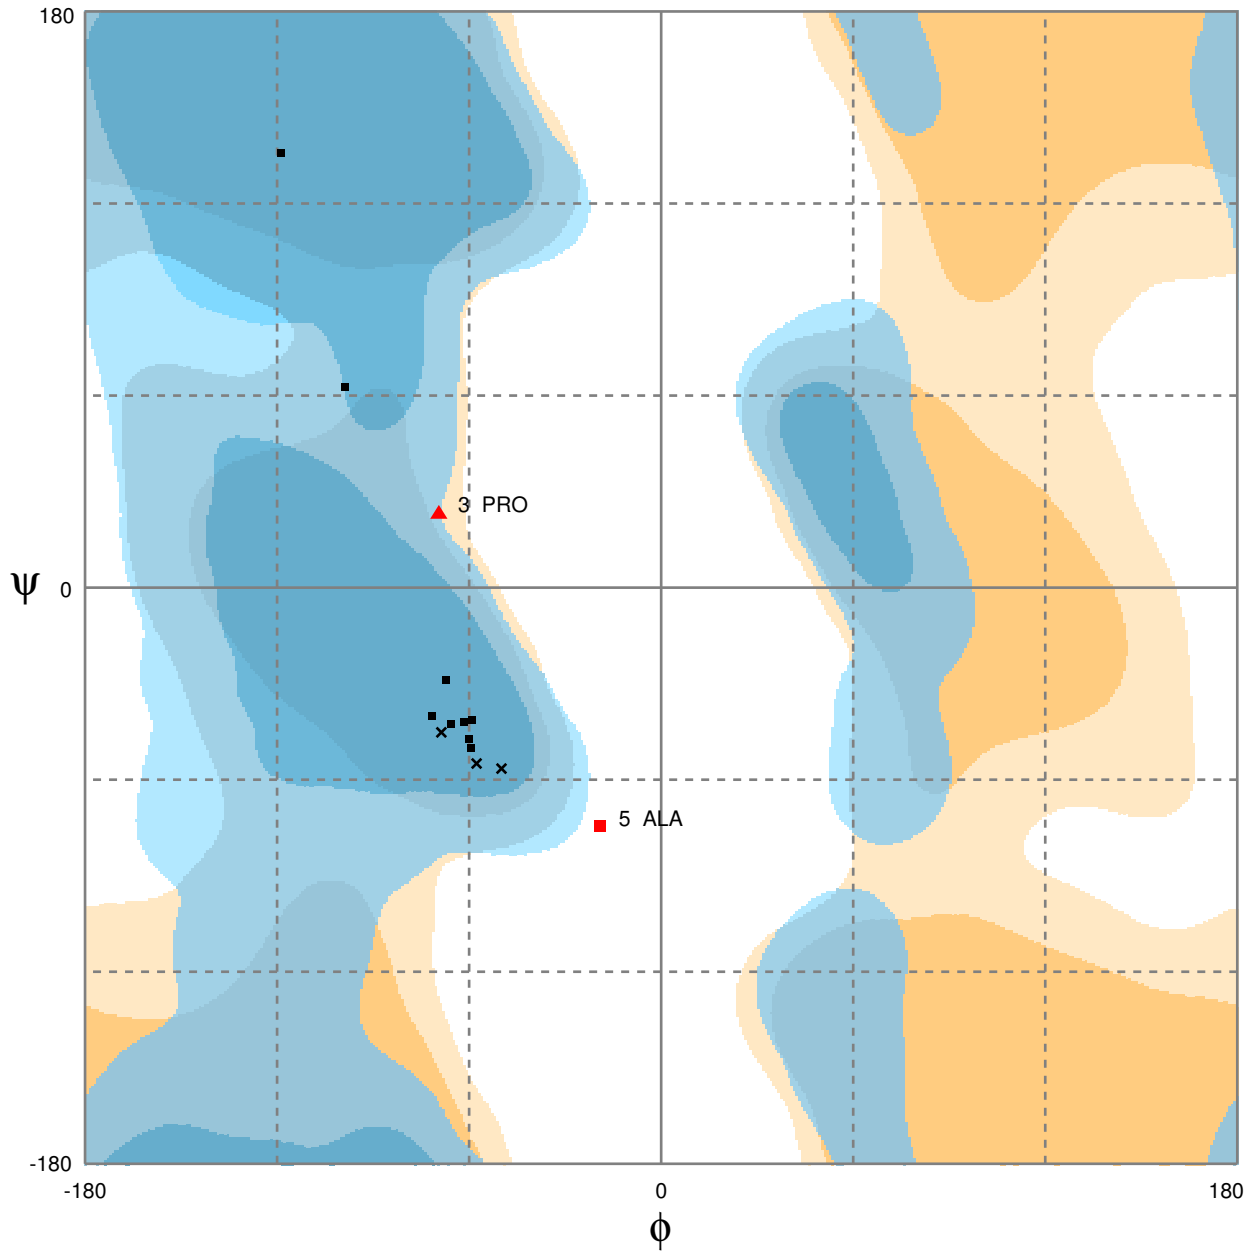

|                                                         |              |
|---------------------------------------------------------|--------------|
| Number of residues in favoured region (~98.0% expected) | : 12 (85.7%) |
| Number of residues in allowed region (~2.0% expected)   | : 0 (0.0%)   |
| Number of residues in outlier region                    | : 2 (14.3%)  |

RAMPAGE by Paul de Bakker and Simon Lovell available at <http://www-cryst.bioc.cam.ac.uk/rampage/>

Please cite: S.C. Lovell, I.W. Davis, W.B. Arendall III, P.I.W. de Bakker, J.M. Word, M.G. Prisant, J.S. Richardson & D.C. Richardson (2002) Structure validation by  $C\alpha$  geometry:  $\phi/\psi$  and  $C\beta$  deviation. *Proteins: Structure, Function & Genetics*. **50**: 437-450

# Tem\_ale

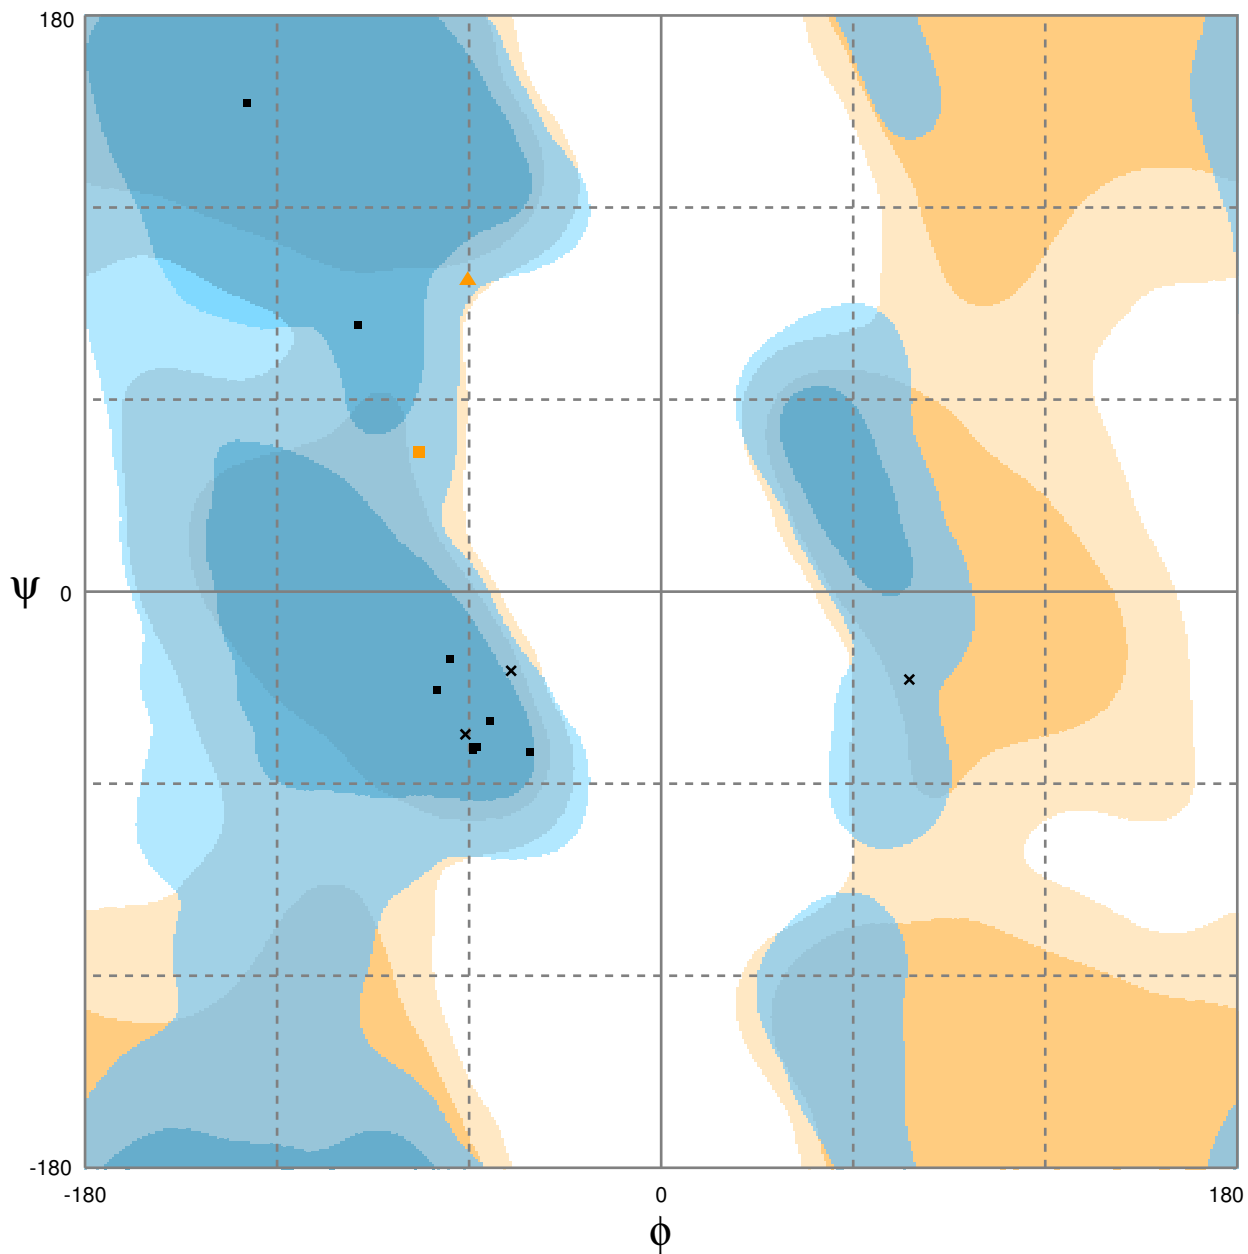

|                                                         |              |
|---------------------------------------------------------|--------------|
| Number of residues in favoured region (~98.0% expected) | : 12 (85.7%) |
| Number of residues in allowed region (~2.0% expected)   | : 2 (14.3%)  |
| Number of residues in outlier region                    | : 0 (0.0%)   |

RAMPAGE by Paul de Bakker and Simon Lovell available at <http://www-cryst.bioc.cam.ac.uk/rampage/>

Please cite: S.C. Lovell, I.W. Davis, W.B. Arendall III, P.I.W. de Bakker, J.M. Word, M.G. Prisant, J.S. Richardson & D.C. Richardson (2002) Structure validation by  $C\alpha$  geometry:  $\phi/\psi$  and  $C\beta$  deviation. *Proteins: Structure, Function & Genetics*. **50**: 437-450

# Tem\_alf

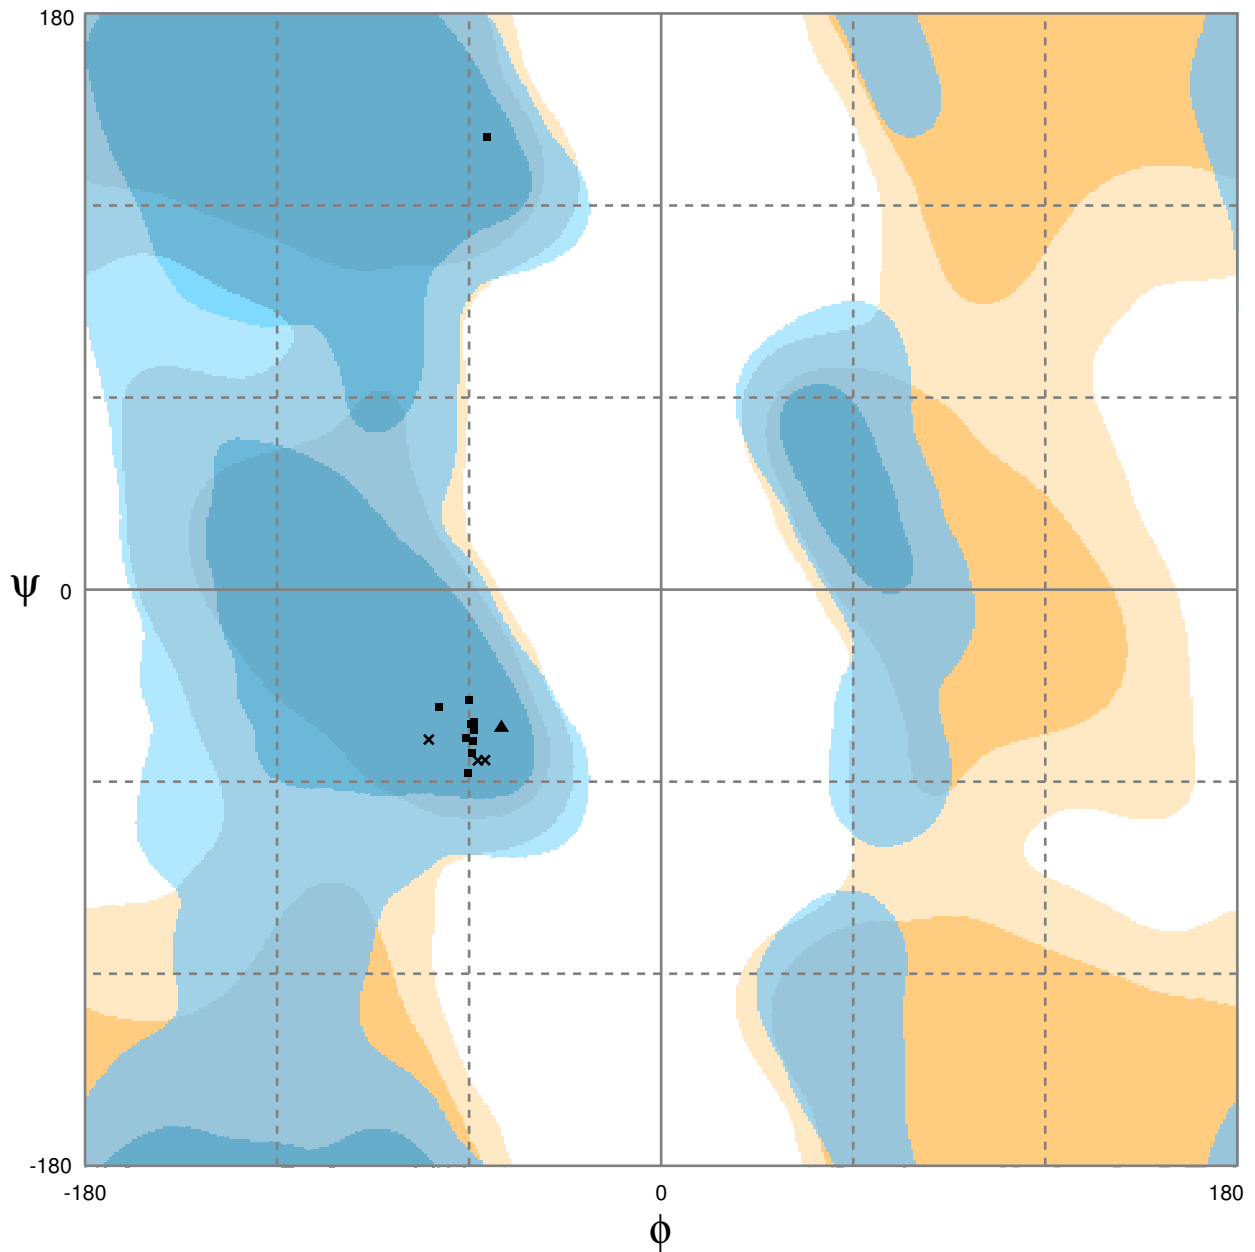

|                                                         |               |
|---------------------------------------------------------|---------------|
| Number of residues in favoured region (~98.0% expected) | : 14 (100.0%) |
| Number of residues in allowed region (~2.0% expected)   | : 0 (0.0%)    |
| Number of residues in outlier region                    | : 0 (0.0%)    |

RAMPAGE by Paul de Bakker and Simon Lovell available at <http://www-cryst.bioc.cam.ac.uk/rampage/>

Please cite: S.C. Lovell, I.W. Davis, W.B. Arendall III, P.I.W. de Bakker, J.M. Word, M.G. Prisant, J.S. Richardson & D.C. Richardson (2002) Structure validation by  $C\alpha$  geometry:  $\phi/\psi$  and  $C\beta$  deviation. *Proteins: Structure, Function & Genetics*. **50**: 437-450

# Tem\_alg

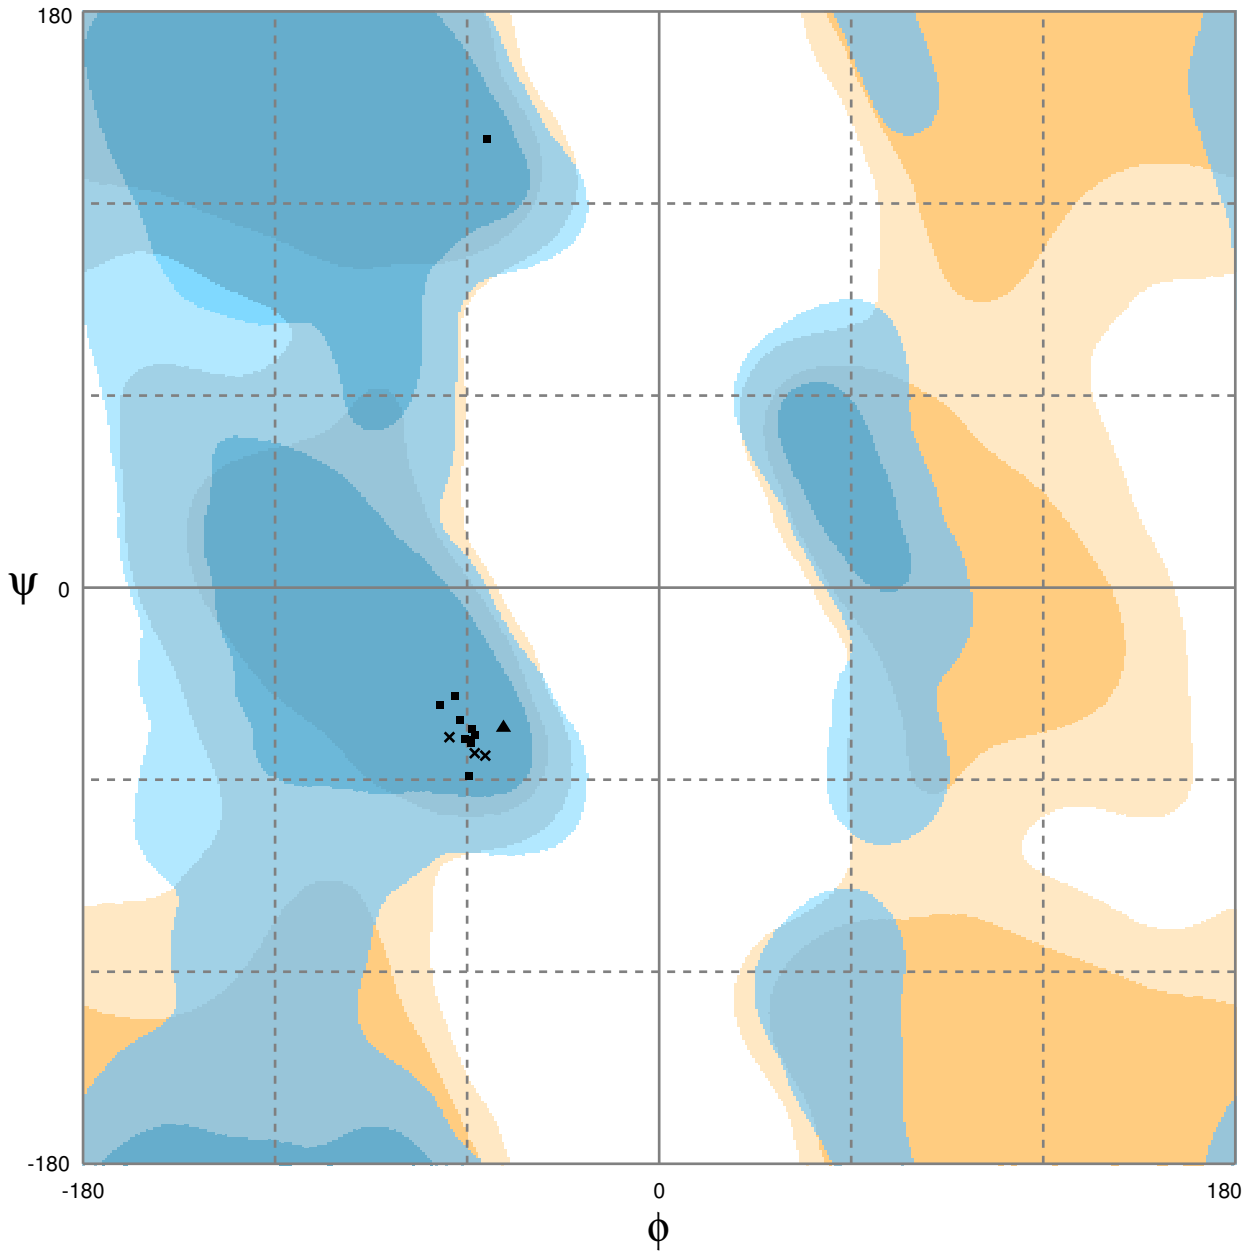

|                                                         |               |
|---------------------------------------------------------|---------------|
| Number of residues in favoured region (~98.0% expected) | : 14 (100.0%) |
| Number of residues in allowed region (~2.0% expected)   | : 0 (0.0%)    |
| Number of residues in outlier region                    | : 0 (0.0%)    |

RAMPAGE by Paul de Bakker and Simon Lovell available at <http://www-cryst.bioc.cam.ac.uk/rampage/>

Please cite: S.C. Lovell, I.W. Davis, W.B. Arendall III, P.I.W. de Bakker, J.M. Word, M.G. Prisant, J.S. Richardson & D.C. Richardson (2002) Structure validation by  $C\alpha$  geometry:  $\phi/\psi$  and  $C\beta$  deviation. *Proteins: Structure, Function & Genetics*. **50**: 437-450

# Tem\_alh

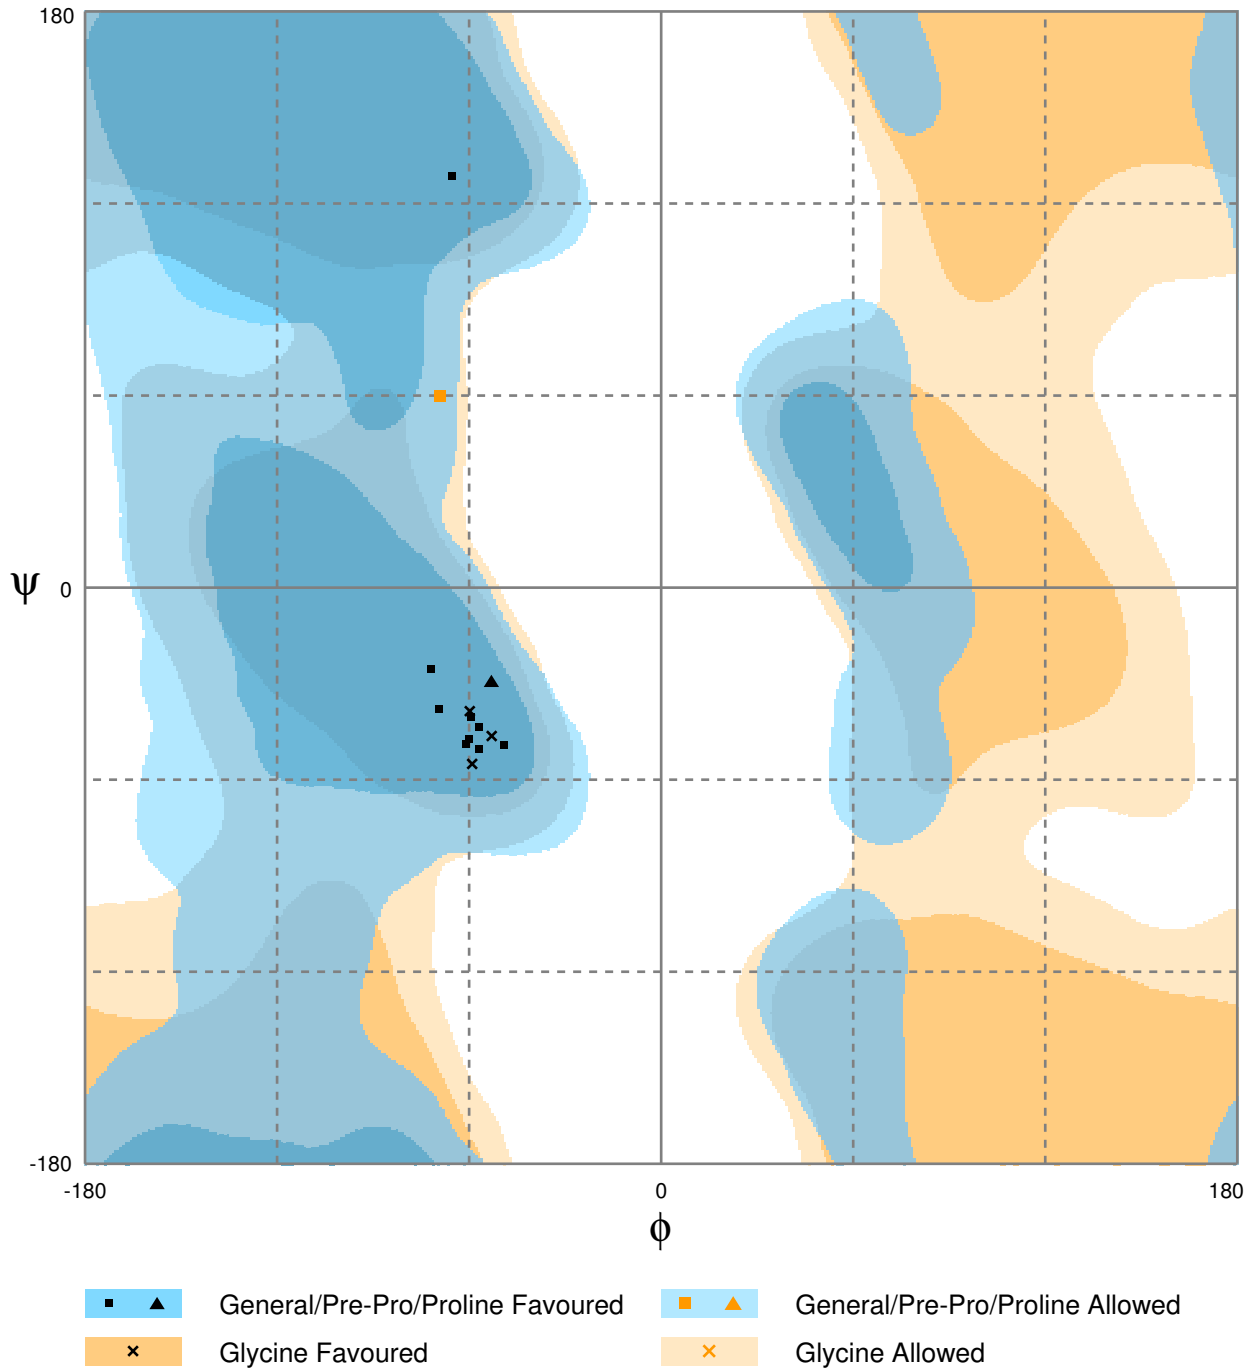

Number of residues in favoured region (~98.0% expected) : 13 (92.9%)  
Number of residues in allowed region (~2.0% expected) : 1 (7.1%)  
Number of residues in outlier region : 0 (0.0%)

RAMPAGE by Paul de Bakker and Simon Lovell available at <http://www-cryst.bioc.cam.ac.uk/rampage/>

Please cite: S.C. Lovell, I.W. Davis, W.B. Arendall III, P.I.W. de Bakker, J.M. Word, M.G. Prisant, J.S. Richardson & D.C. Richardson (2002) Structure validation by  $C\alpha$  geometry:  $\phi/\psi$  and  $C\beta$  deviation. *Proteins: Structure, Function & Genetics*. **50**: 437-450

# Tem\_ali

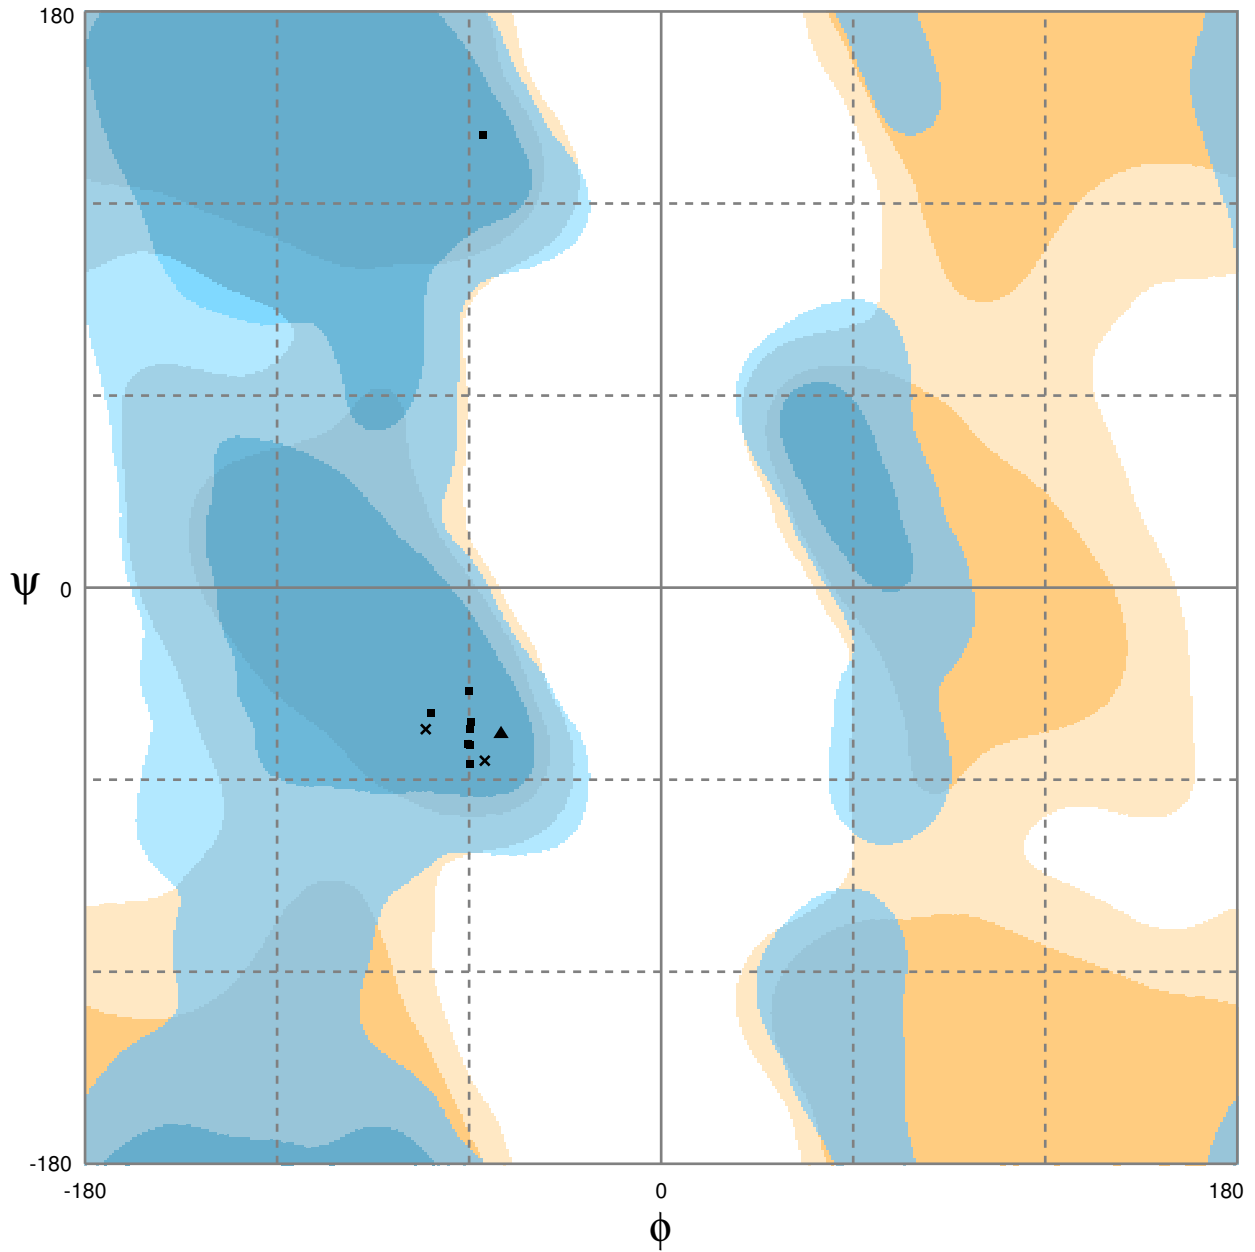

Number of residues in favoured region (~98.0% expected) : 11 (100.0%)  
Number of residues in allowed region (~2.0% expected) : 0 (0.0%)  
Number of residues in outlier region : 0 (0.0%)

RAMPAGE by Paul de Bakker and Simon Lovell available at <http://www-cryst.bioc.cam.ac.uk/rampage/>

Please cite: S.C. Lovell, I.W. Davis, W.B. Arendall III, P.I.W. de Bakker, J.M. Word, M.G. Prisant, J.S. Richardson & D.C. Richardson (2002) Structure validation by  $C\alpha$  geometry:  $\phi/\psi$  and  $C\beta$  deviation. *Proteins: Structure, Function & Genetics*. **50**: 437-450

# Tem\_alj

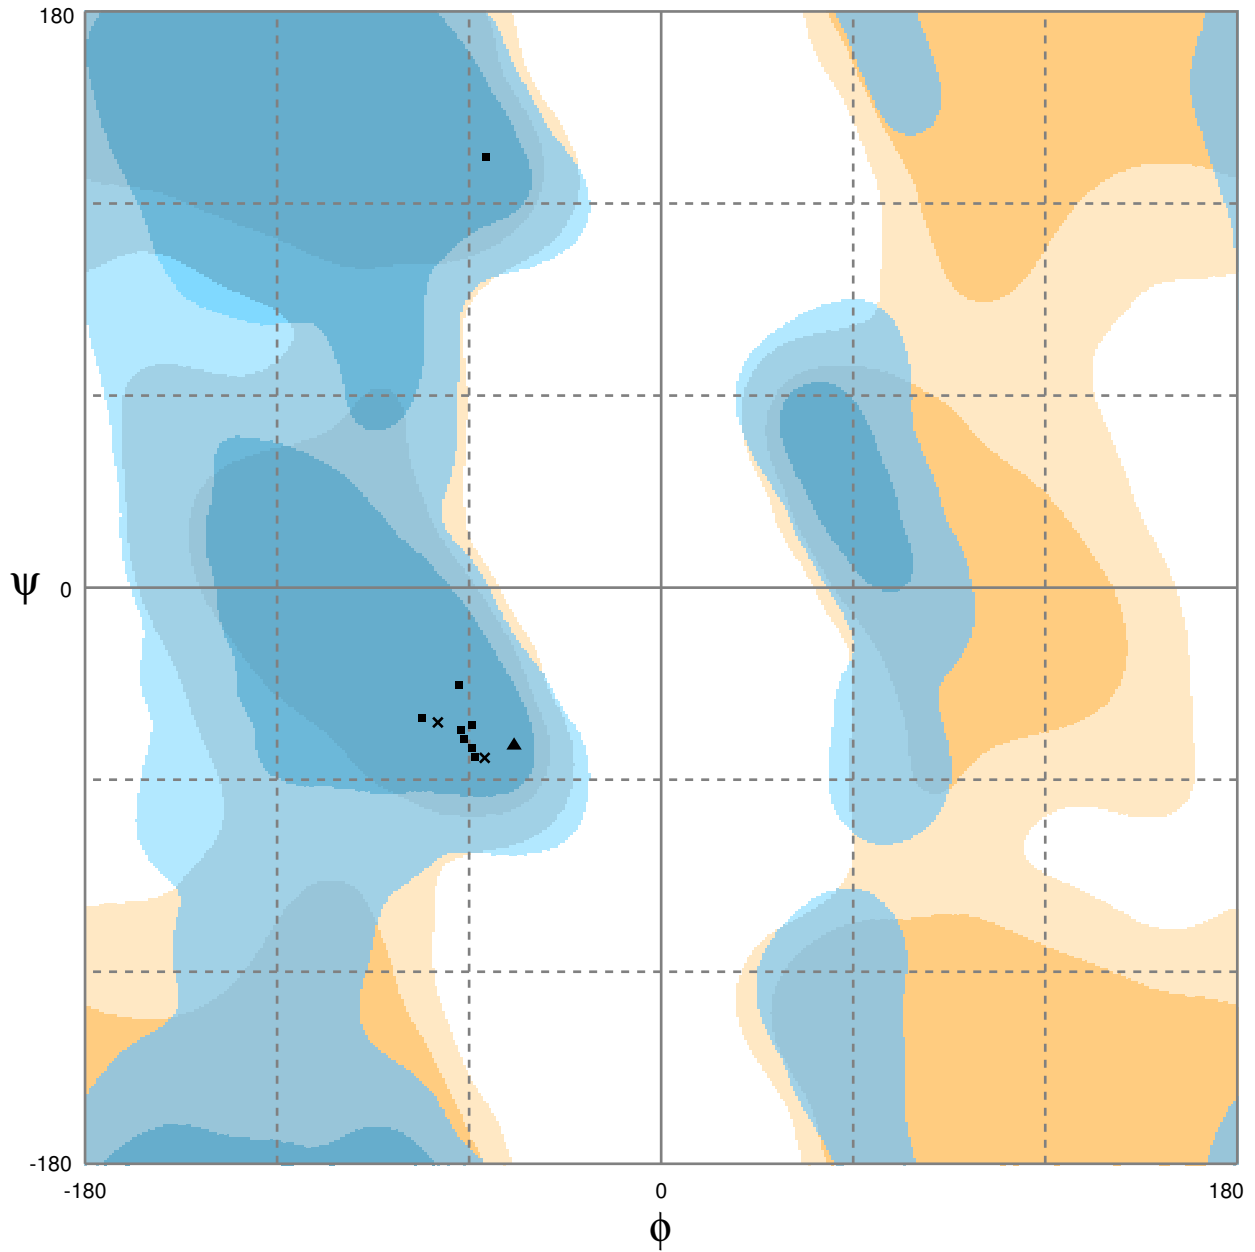

|                                                         |               |
|---------------------------------------------------------|---------------|
| Number of residues in favoured region (~98.0% expected) | : 11 (100.0%) |
| Number of residues in allowed region (~2.0% expected)   | : 0 (0.0%)    |
| Number of residues in outlier region                    | : 0 (0.0%)    |

RAMPAGE by Paul de Bakker and Simon Lovell available at <http://www-cryst.bioc.cam.ac.uk/rampage/>

Please cite: S.C. Lovell, I.W. Davis, W.B. Arendall III, P.I.W. de Bakker, J.M. Word, M.G. Prisant, J.S. Richardson & D.C. Richardson (2002) Structure validation by  $C\alpha$  geometry:  $\phi/\psi$  and  $C\beta$  deviation. *Proteins: Structure, Function & Genetics*. **50**: 437-450

# Tem\_alk

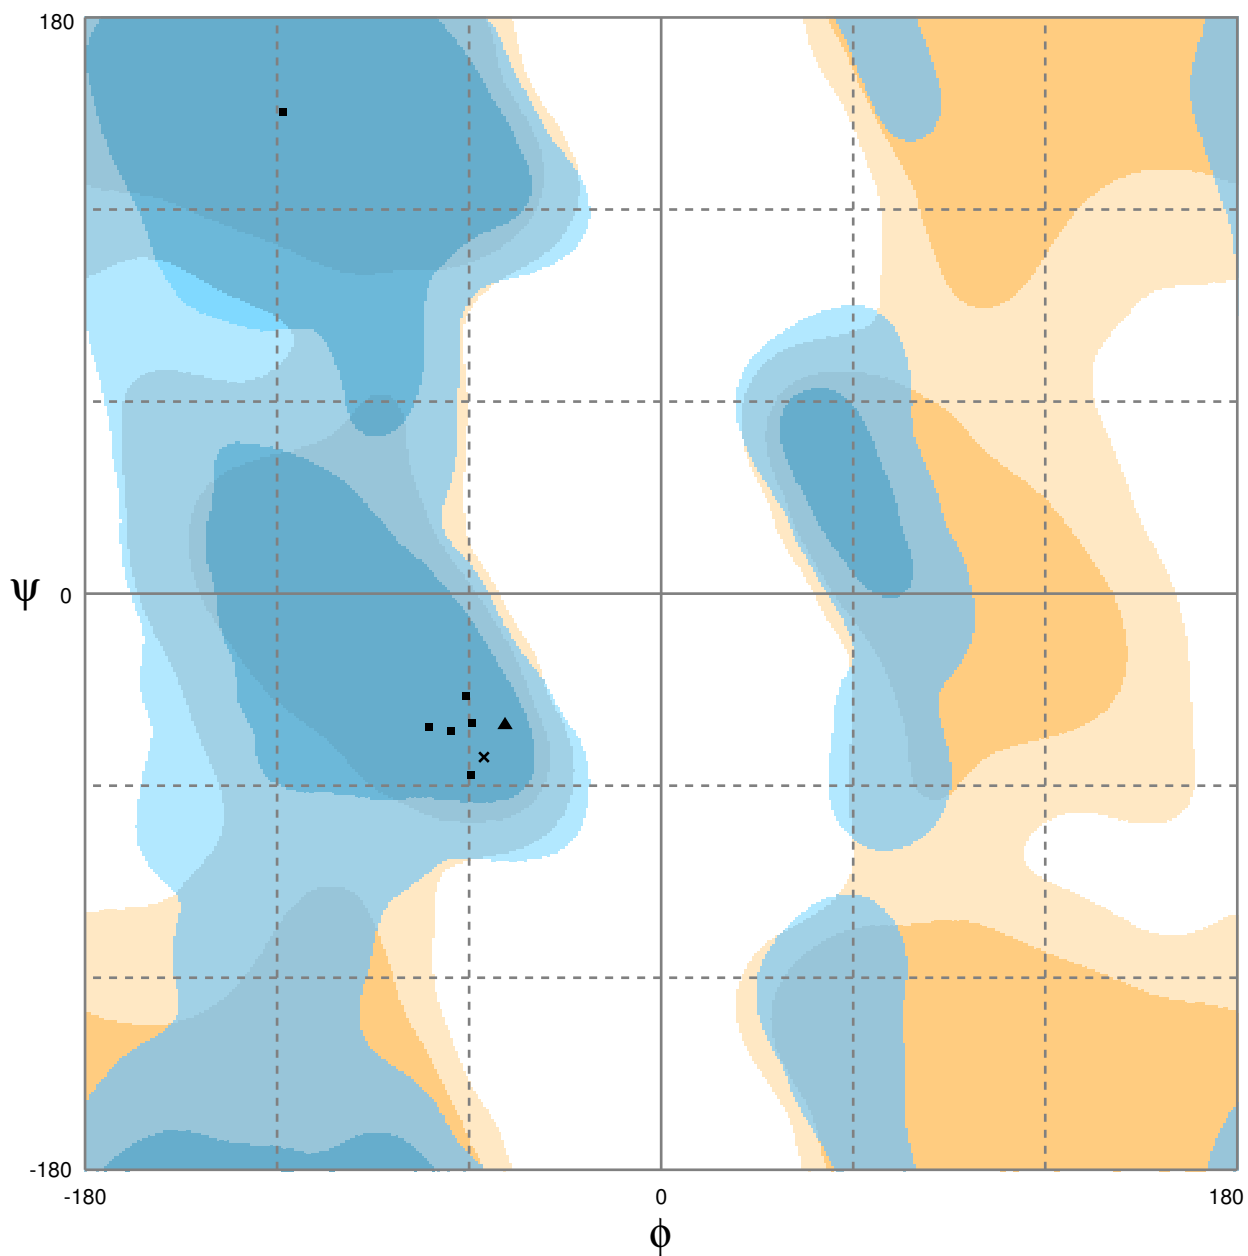

|                                                         |              |
|---------------------------------------------------------|--------------|
| Number of residues in favoured region (~98.0% expected) | : 8 (100.0%) |
| Number of residues in allowed region (~2.0% expected)   | : 0 (0.0%)   |
| Number of residues in outlier region                    | : 0 (0.0%)   |

RAMPAGE by Paul de Bakker and Simon Lovell available at <http://www-cryst.bioc.cam.ac.uk/rampage/>

Please cite: S.C. Lovell, I.W. Davis, W.B. Arendall III, P.I.W. de Bakker, J.M. Word, M.G. Prisant, J.S. Richardson & D.C. Richardson (2002) Structure validation by  $C\alpha$  geometry:  $\phi/\psi$  and  $C\beta$  deviation. *Proteins: Structure, Function & Genetics*. **50**: 437-450



# Tem\_b

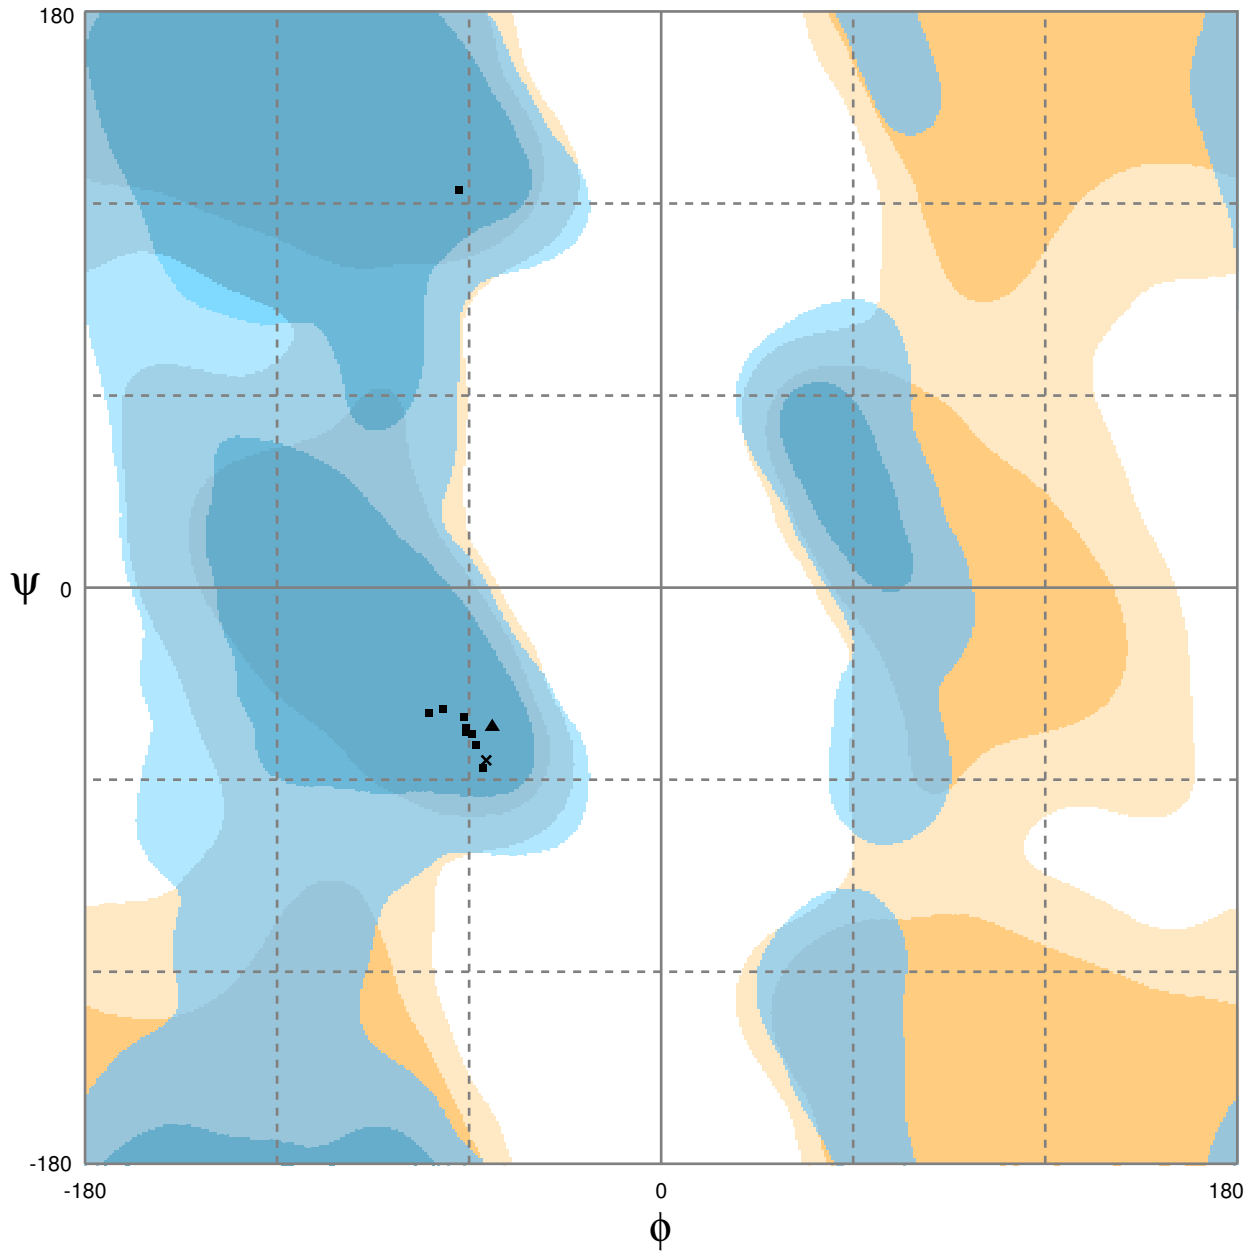

Number of residues in favoured region (~98.0% expected) : 11 (100.0%)  
Number of residues in allowed region (~2.0% expected) : 0 (0.0%)  
Number of residues in outlier region : 0 (0.0%)

RAMPAGE by Paul de Bakker and Simon Lovell available at <http://www-cryst.bioc.cam.ac.uk/rampage/>

Please cite: S.C. Lovell, I.W. Davis, W.B. Arendall III, P.I.W. de Bakker, J.M. Word, M.G. Prisant, J.S. Richardson & D.C. Richardson (2002) Structure validation by  $C\alpha$  geometry:  $\phi/\psi$  and  $C\beta$  deviation. *Proteins: Structure, Function & Genetics*. **50**: 437-450

# Tem\_c

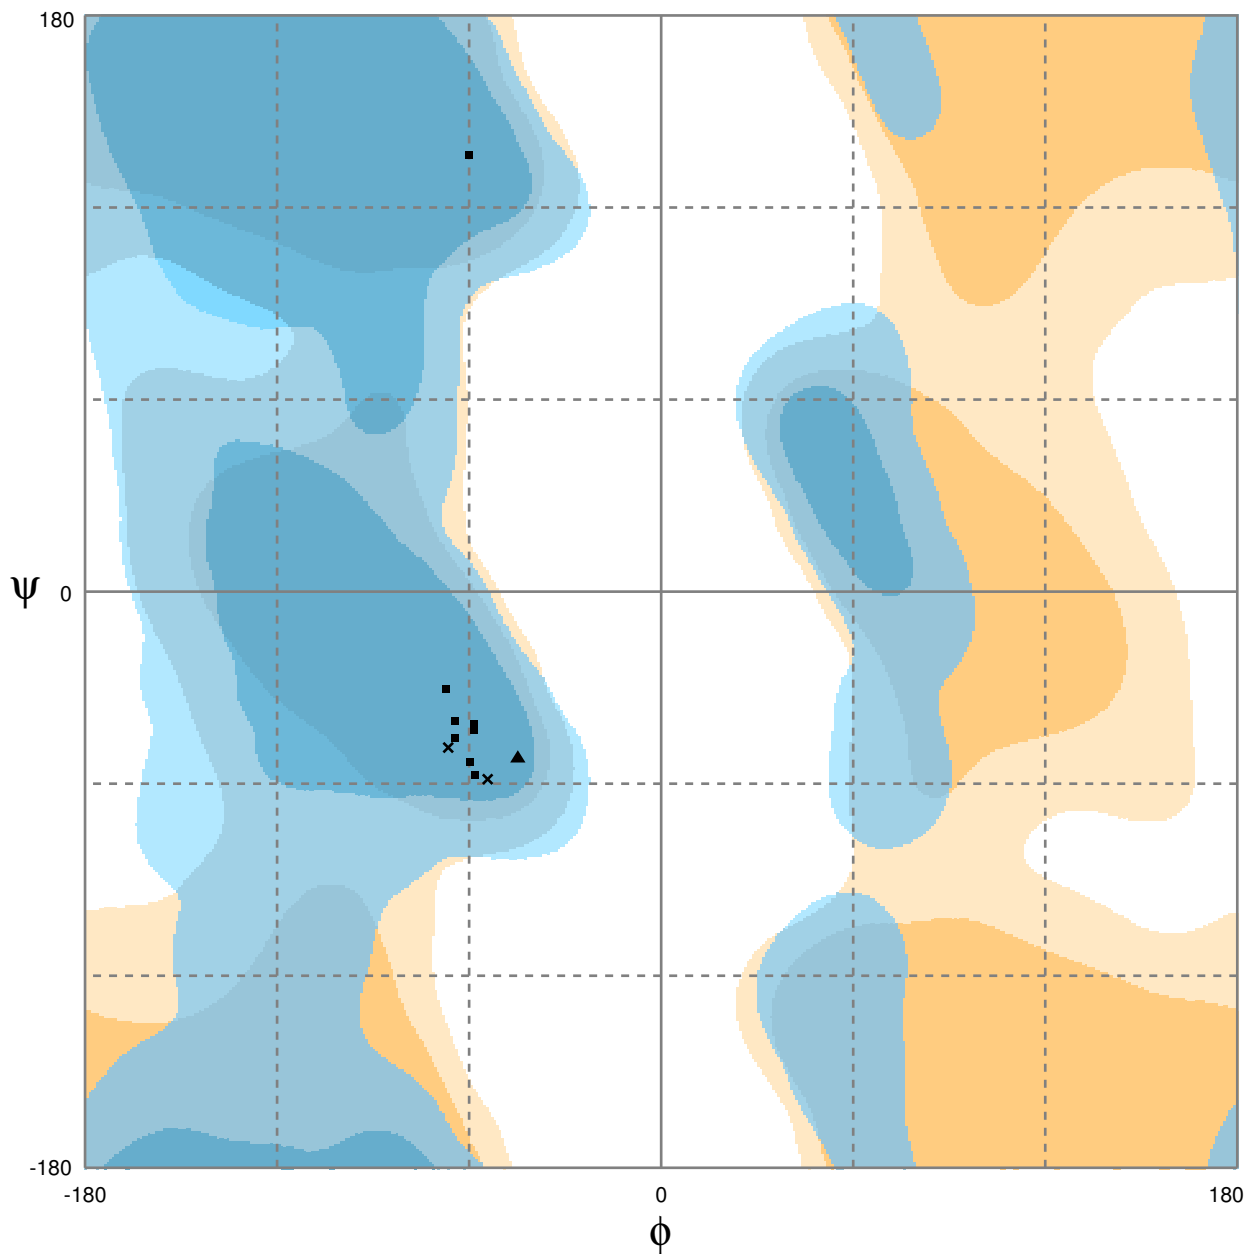

|                                                         |               |
|---------------------------------------------------------|---------------|
| Number of residues in favoured region (~98.0% expected) | : 11 (100.0%) |
| Number of residues in allowed region (~2.0% expected)   | : 0 (0.0%)    |
| Number of residues in outlier region                    | : 0 (0.0%)    |

RAMPAGE by Paul de Bakker and Simon Lovell available at <http://www-cryst.bioc.cam.ac.uk/rampage/>

Please cite: S.C. Lovell, I.W. Davis, W.B. Arendall III, P.I.W. de Bakker, J.M. Word, M.G. Prisant, J.S. Richardson & D.C. Richardson (2002) Structure validation by  $C\alpha$  geometry:  $\phi/\psi$  and  $C\beta$  deviation. *Proteins: Structure, Function & Genetics*. **50**: 437-450

# Tem\_cg1

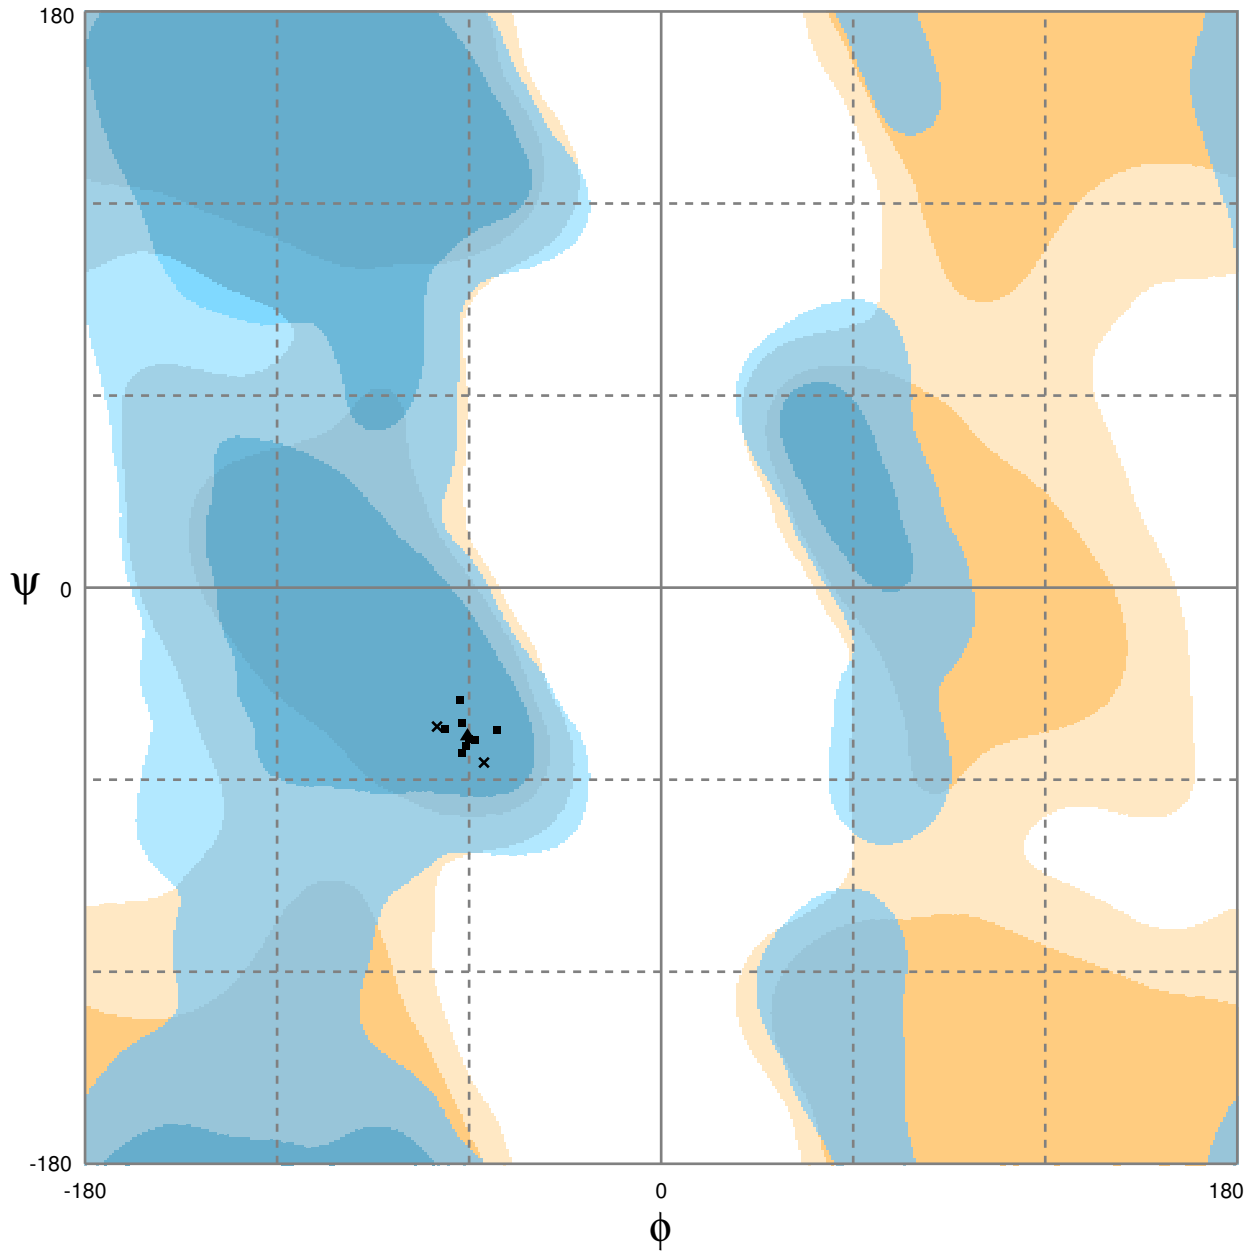

|                                                         |               |
|---------------------------------------------------------|---------------|
| Number of residues in favoured region (~98.0% expected) | : 11 (100.0%) |
| Number of residues in allowed region (~2.0% expected)   | : 0 (0.0%)    |
| Number of residues in outlier region                    | : 0 (0.0%)    |

RAMPAGE by Paul de Bakker and Simon Lovell available at <http://www-cryst.bioc.cam.ac.uk/rampage/>

Please cite: S.C. Lovell, I.W. Davis, W.B. Arendall III, P.I.W. de Bakker, J.M. Word, M.G. Prisant, J.S. Richardson & D.C. Richardson (2002) Structure validation by  $C\alpha$  geometry:  $\phi/\psi$  and  $C\beta$  deviation. *Proteins: Structure, Function & Genetics*. **50**: 437-450

# Tem\_cg2

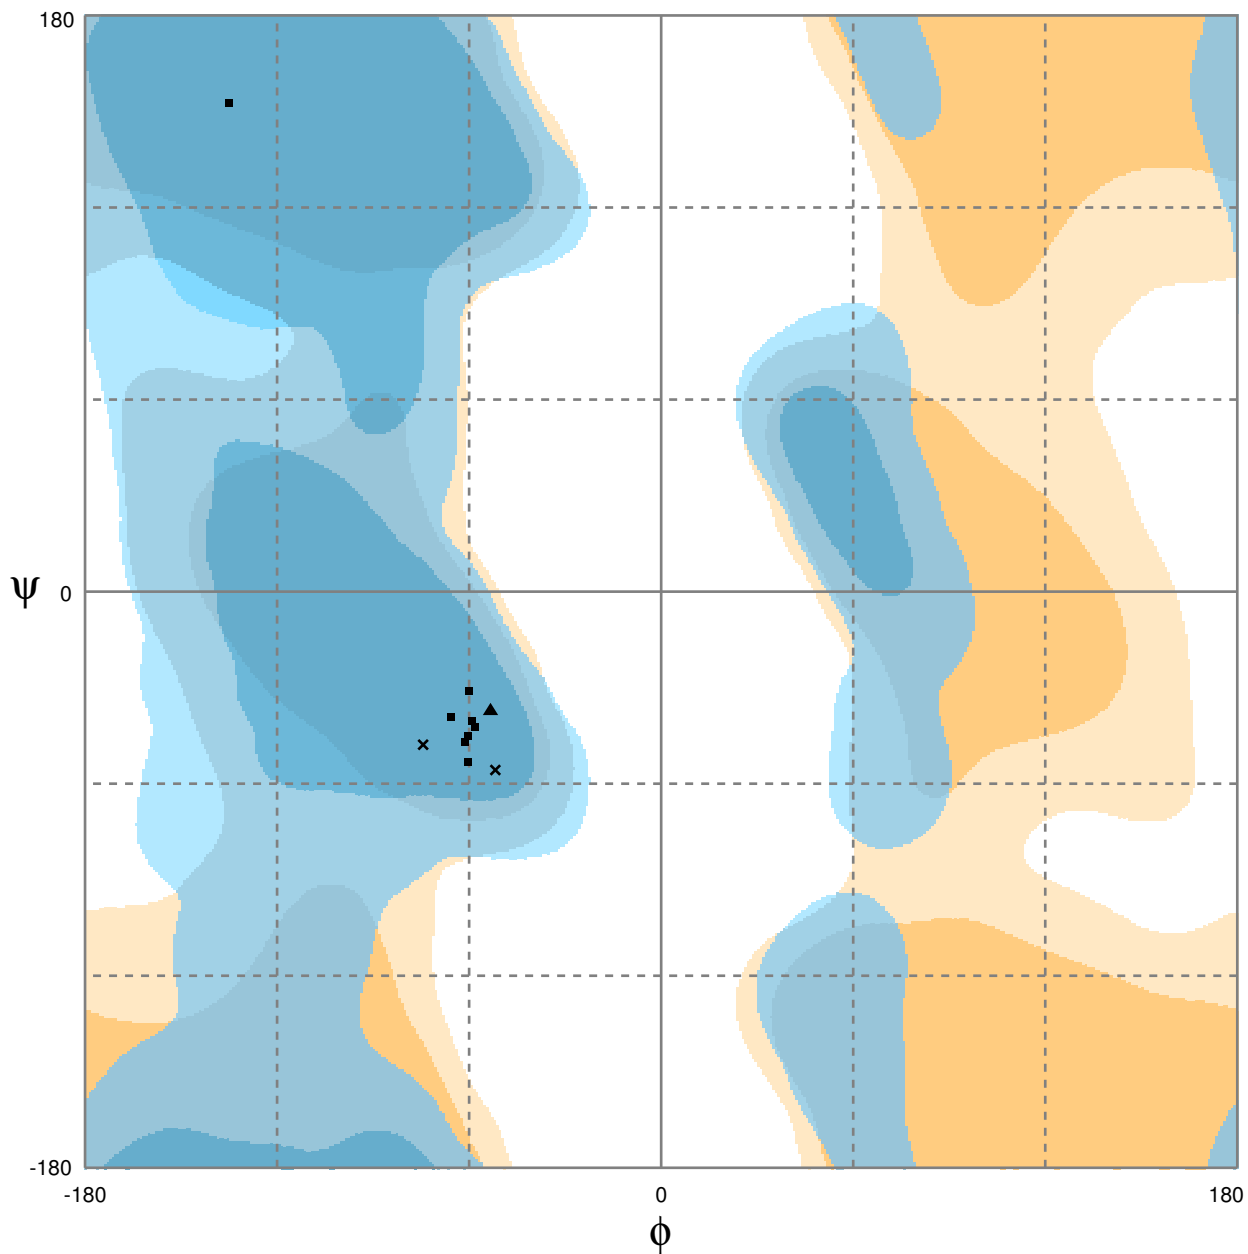

|                                                         |               |
|---------------------------------------------------------|---------------|
| Number of residues in favoured region (~98.0% expected) | : 11 (100.0%) |
| Number of residues in allowed region (~2.0% expected)   | : 0 (0.0%)    |
| Number of residues in outlier region                    | : 0 (0.0%)    |

RAMPAGE by Paul de Bakker and Simon Lovell available at <http://www-cryst.bioc.cam.ac.uk/rampage/>

Please cite: S.C. Lovell, I.W. Davis, W.B. Arendall III, P.I.W. de Bakker, J.M. Word, M.G. Prisant, J.S. Richardson & D.C. Richardson (2002) Structure validation by  $C\alpha$  geometry:  $\phi/\psi$  and  $C\beta$  deviation. *Proteins: Structure, Function & Genetics*. **50**: 437-450

# Tem\_cg3

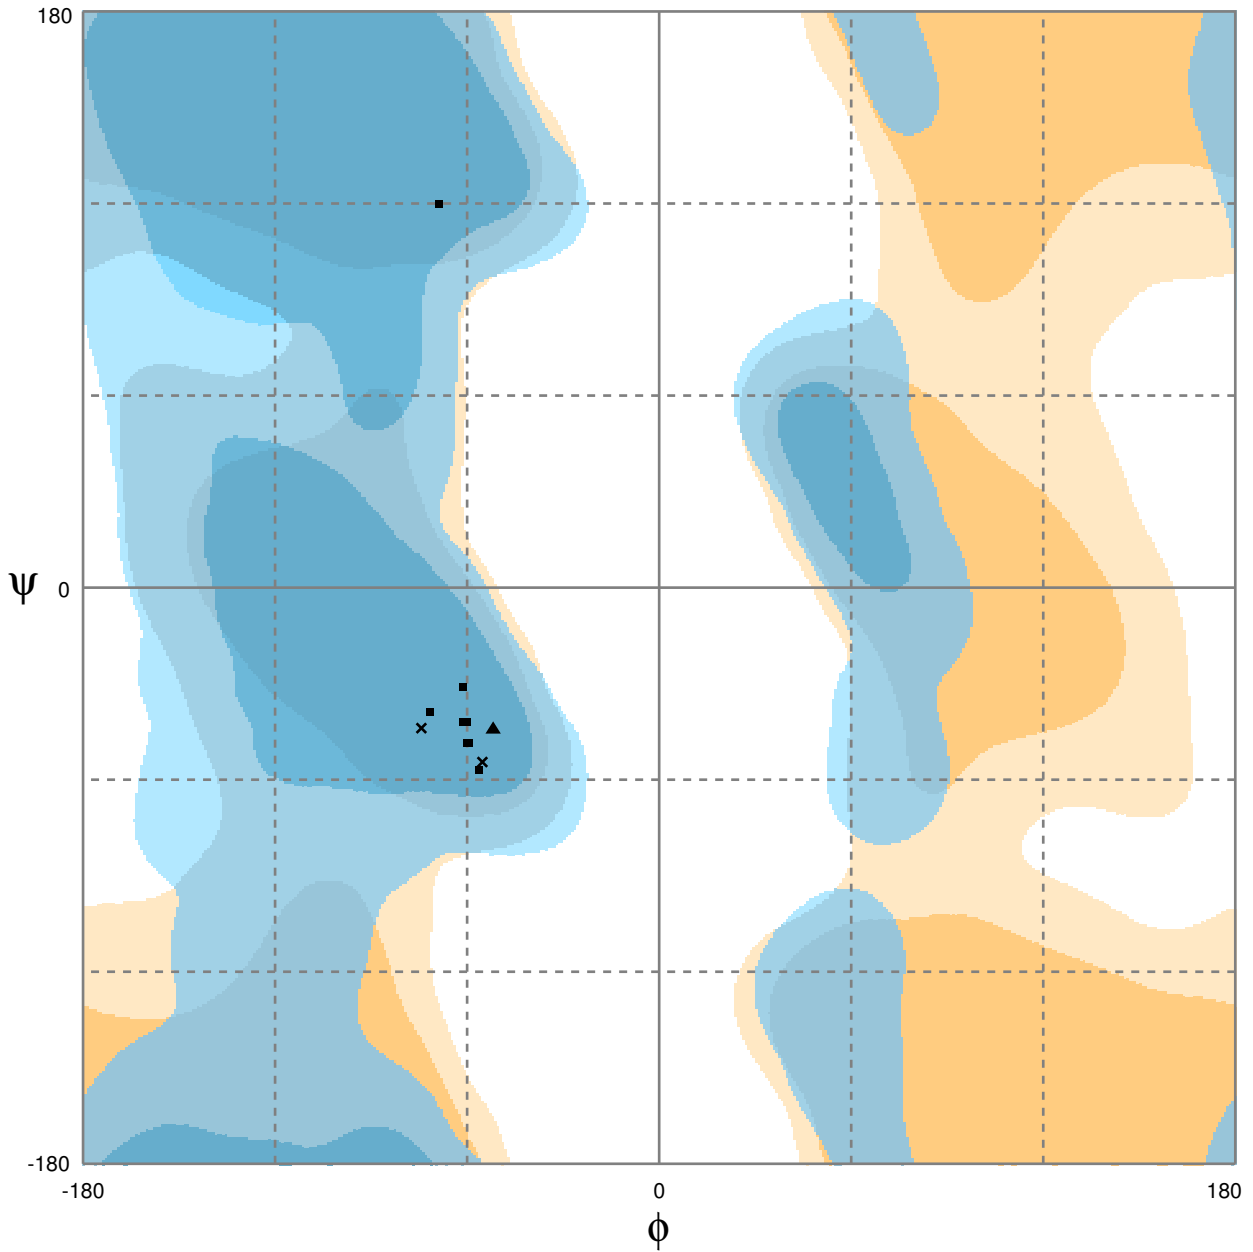

|                                                         |               |
|---------------------------------------------------------|---------------|
| Number of residues in favoured region (~98.0% expected) | : 11 (100.0%) |
| Number of residues in allowed region (~2.0% expected)   | : 0 (0.0%)    |
| Number of residues in outlier region                    | : 0 (0.0%)    |

RAMPAGE by Paul de Bakker and Simon Lovell available at <http://www-cryst.bioc.cam.ac.uk/rampage/>

Please cite: S.C. Lovell, I.W. Davis, W.B. Arendall III, P.I.W. de Bakker, J.M. Word, M.G. Prisant, J.S. Richardson & D.C. Richardson (2002) Structure validation by  $C\alpha$  geometry:  $\phi/\psi$  and  $C\beta$  deviation. *Proteins: Structure, Function & Genetics*. **50**: 437-450

# Tem\_cpa

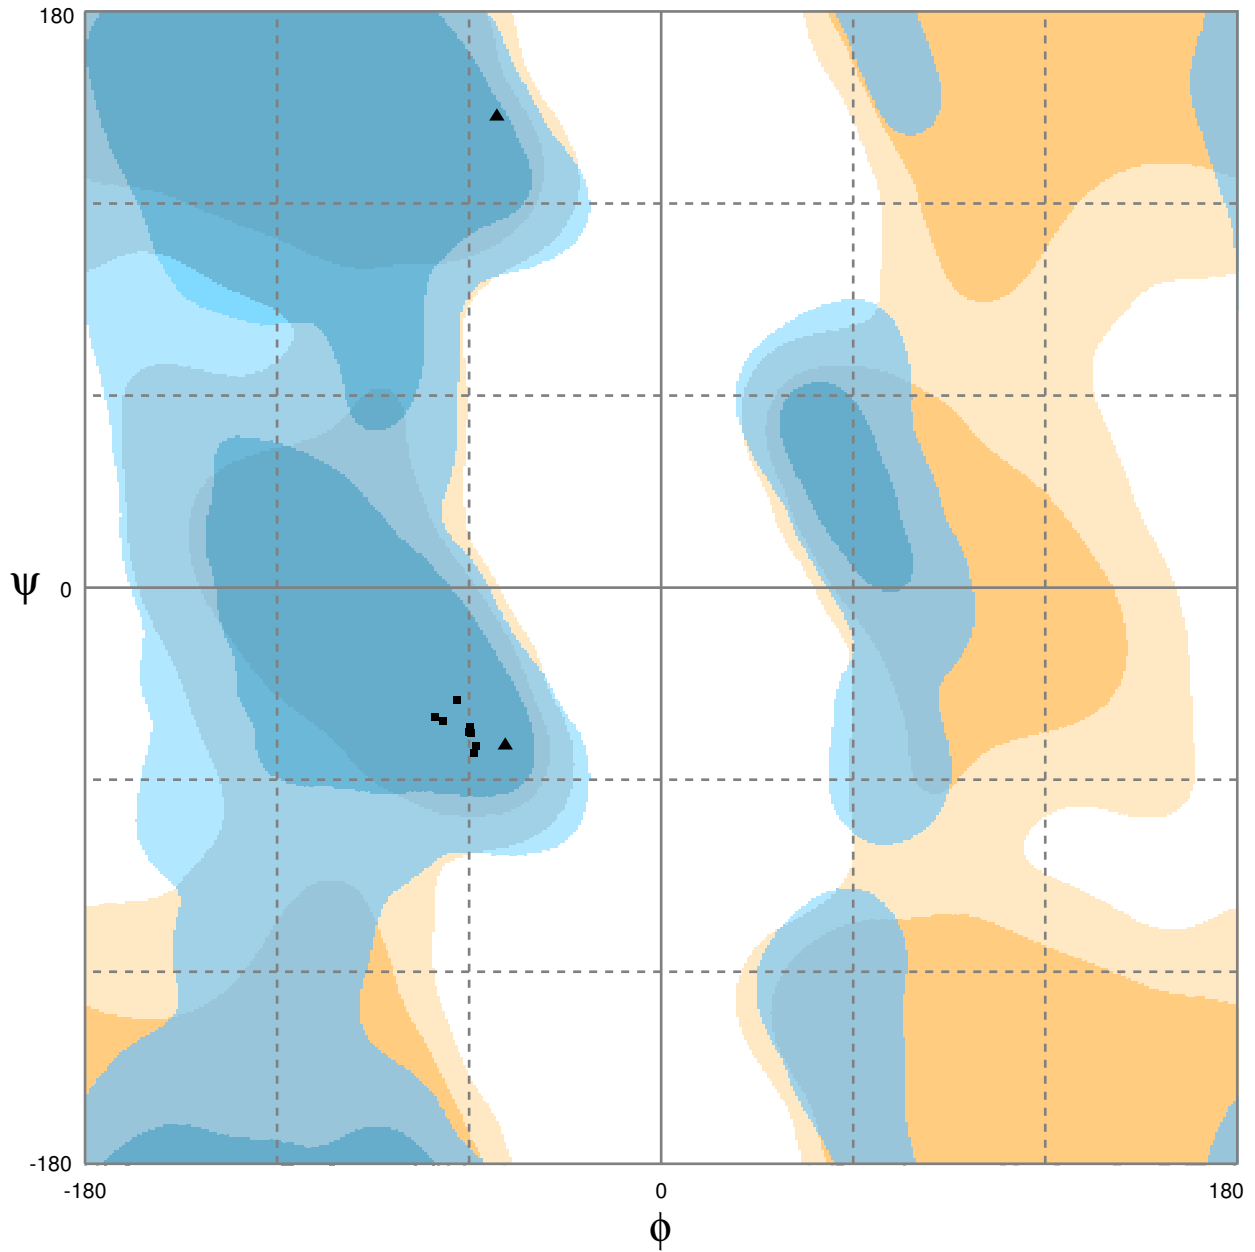

|                                                         |               |
|---------------------------------------------------------|---------------|
| Number of residues in favoured region (~98.0% expected) | : 11 (100.0%) |
| Number of residues in allowed region (~2.0% expected)   | : 0 (0.0%)    |
| Number of residues in outlier region                    | : 0 (0.0%)    |

RAMPAGE by Paul de Bakker and Simon Lovell available at <http://www-cryst.bioc.cam.ac.uk/rampage/>

Please cite: S.C. Lovell, I.W. Davis, W.B. Arendall III, P.I.W. de Bakker, J.M. Word, M.G. Prisant, J.S. Richardson & D.C. Richardson (2002) Structure validation by  $C\alpha$  geometry:  $\phi/\psi$  and  $C\beta$  deviation. *Proteins: Structure, Function & Genetics*. **50**: 437-450

# Tem\_cpb

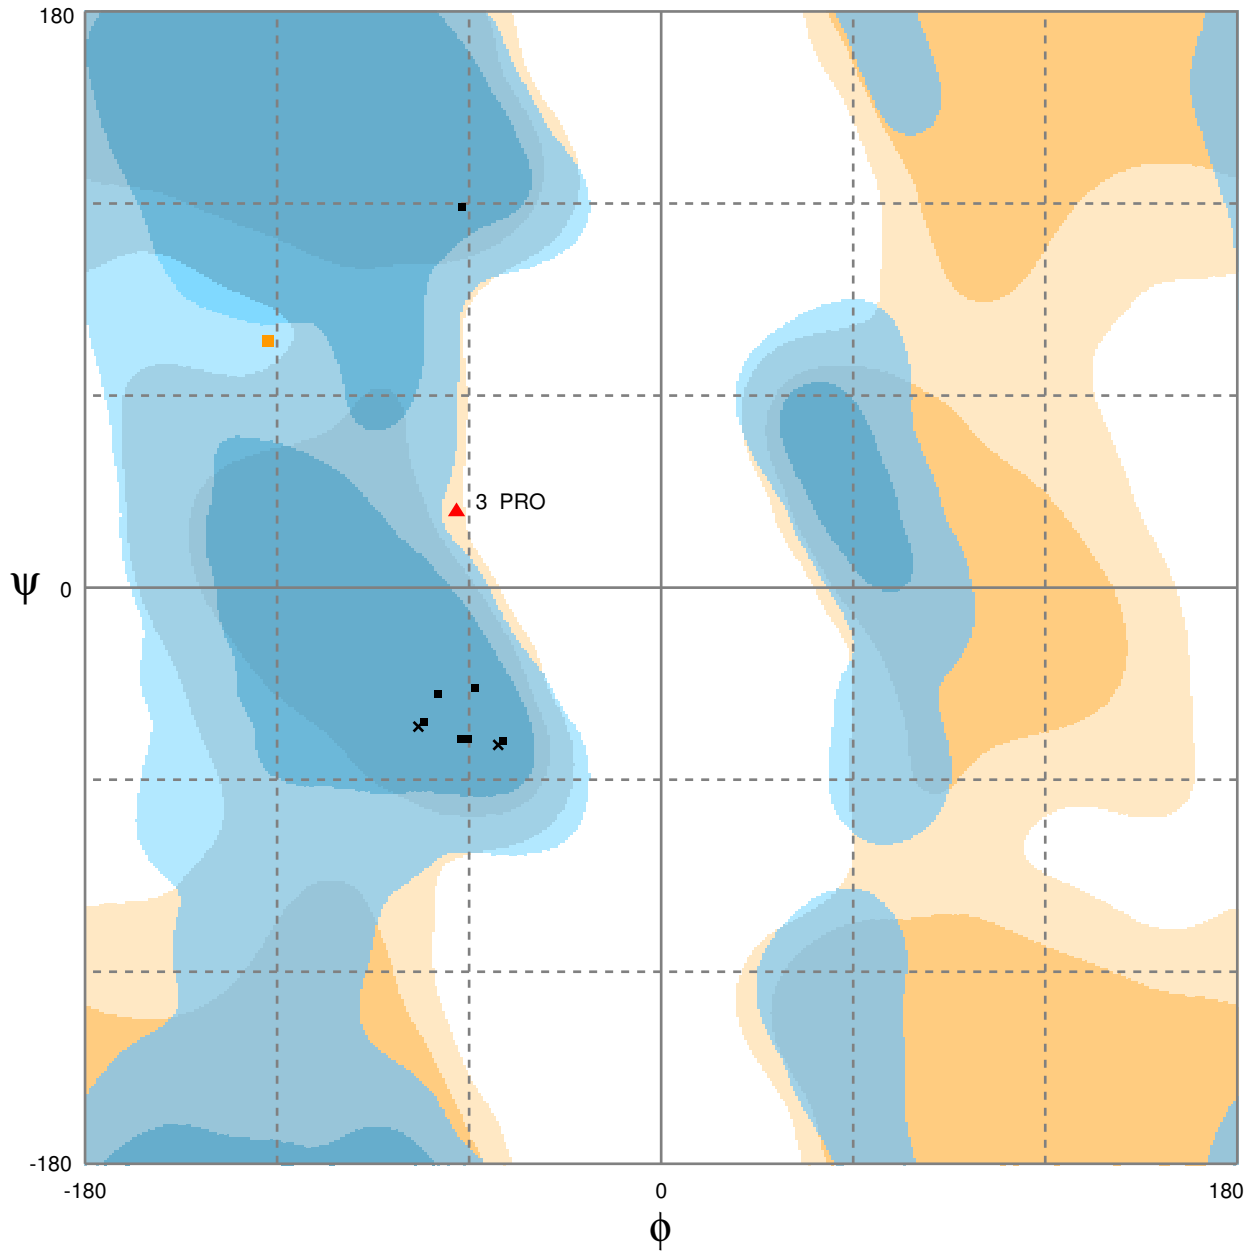

|                                                         |             |
|---------------------------------------------------------|-------------|
| Number of residues in favoured region (~98.0% expected) | : 9 (81.8%) |
| Number of residues in allowed region (~2.0% expected)   | : 1 (9.1%)  |
| Number of residues in outlier region                    | : 1 (9.1%)  |

RAMPAGE by Paul de Bakker and Simon Lovell available at <http://www-cryst.bioc.cam.ac.uk/rampage/>

Please cite: S.C. Lovell, I.W. Davis, W.B. Arendall III, P.I.W. de Bakker, J.M. Word, M.G. Prisant, J.S. Richardson & D.C. Richardson (2002) Structure validation by  $C\alpha$  geometry:  $\phi/\psi$  and  $C\beta$  deviation. *Proteins: Structure, Function & Genetics*. **50**: 437-450

# Tem\_d

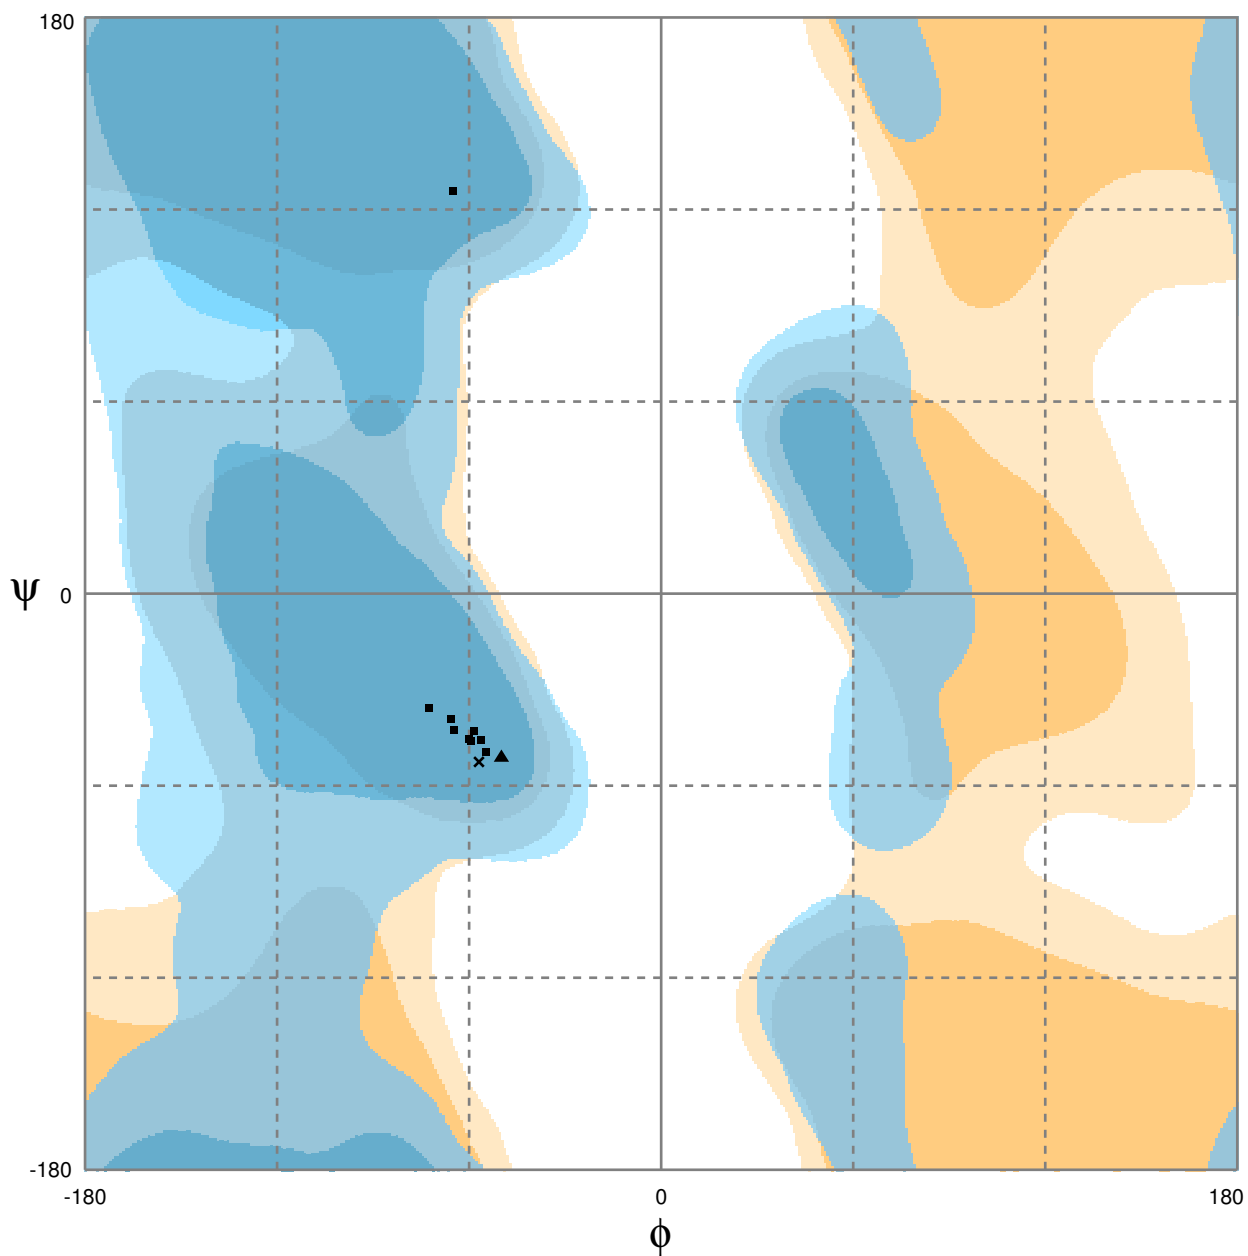

Number of residues in favoured region (~98.0% expected) : 11 (100.0%)  
Number of residues in allowed region (~2.0% expected) : 0 (0.0%)  
Number of residues in outlier region : 0 (0.0%)

RAMPAGE by Paul de Bakker and Simon Lovell available at <http://www-cryst.bioc.cam.ac.uk/rampage/>

Please cite: S.C. Lovell, I.W. Davis, W.B. Arendall III, P.I.W. de Bakker, J.M. Word, M.G. Prisant, J.S. Richardson & D.C. Richardson (2002) Structure validation by  $C\alpha$  geometry:  $\phi/\psi$  and  $C\beta$  deviation. *Proteins: Structure, Function & Genetics*. **50**: 437-450



# Tem\_e

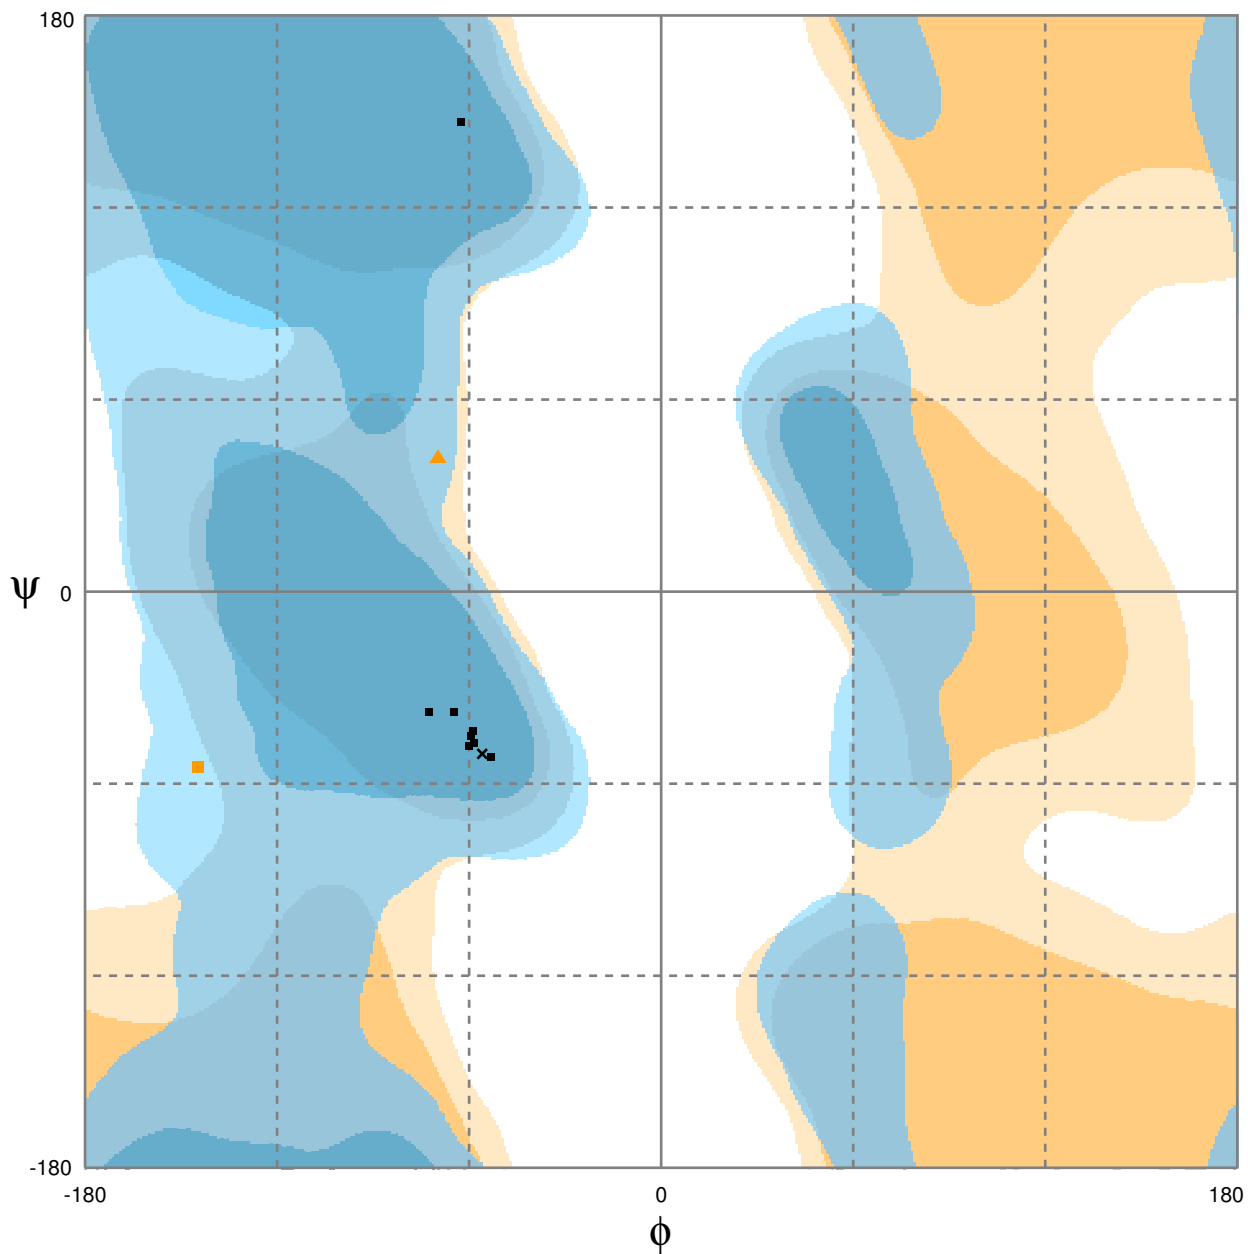

|     |                                  |     |                                 |
|-----|----------------------------------|-----|---------------------------------|
| ■ ▲ | General/Pre-Pro/Proline Favoured | ■ ▲ | General/Pre-Pro/Proline Allowed |
| ×   | Glycine Favoured                 | ×   | Glycine Allowed                 |

|                                                         |             |
|---------------------------------------------------------|-------------|
| Number of residues in favoured region (~98.0% expected) | : 9 (81.8%) |
| Number of residues in allowed region (~2.0% expected)   | : 2 (18.2%) |
| Number of residues in outlier region                    | : 0 (0.0%)  |

RAMPAGE by Paul de Bakker and Simon Lovell available at <http://www-cryst.bioc.cam.ac.uk/rampage/>

Please cite: S.C. Lovell, I.W. Davis, W.B. Arendall III, P.I.W. de Bakker, J.M. Word, M.G. Prisant, J.S. Richardson & D.C. Richardson (2002) Structure validation by  $C\alpha$  geometry:  $\phi/\psi$  and  $C\beta$  deviation. *Proteins: Structure, Function & Genetics*. **50**: 437-450

# Tem\_eca

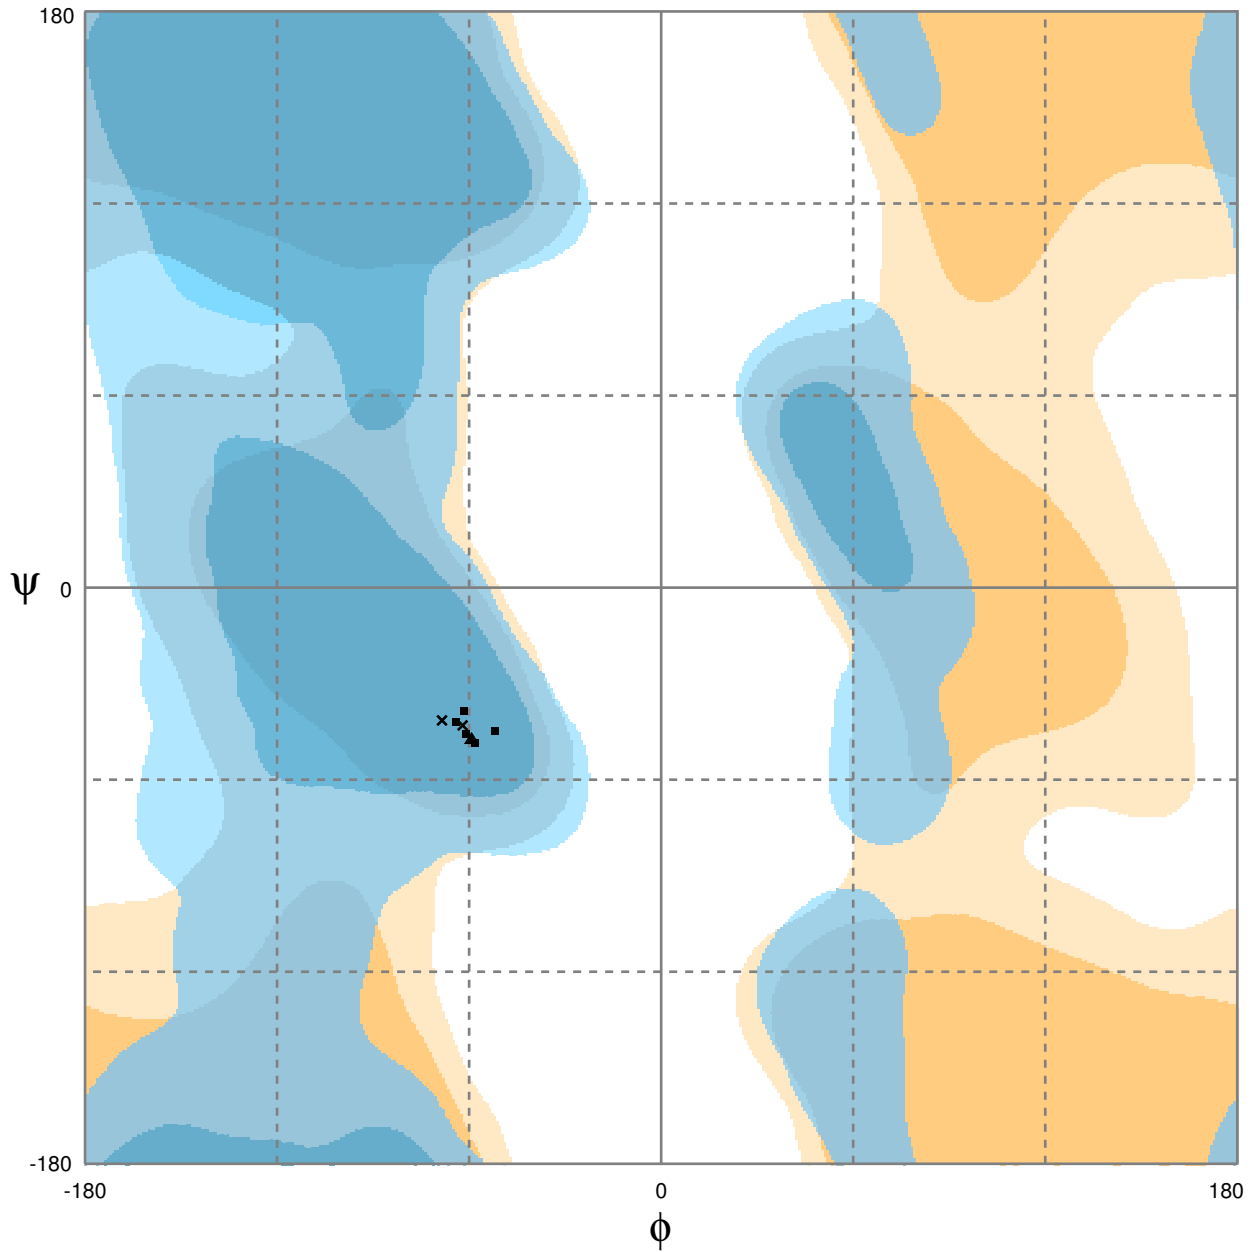

Number of residues in favoured region (~98.0% expected) : 8 (100.0%)  
Number of residues in allowed region (~2.0% expected) : 0 (0.0%)  
Number of residues in outlier region : 0 (0.0%)

RAMPAGE by Paul de Bakker and Simon Lovell available at <http://www-cryst.bioc.cam.ac.uk/rampage/>

Please cite: S.C. Lovell, I.W. Davis, W.B. Arendall III, P.I.W. de Bakker, J.M. Word, M.G. Prisant, J.S. Richardson & D.C. Richardson (2002) Structure validation by  $C\alpha$  geometry:  $\phi/\psi$  and  $C\beta$  deviation. *Proteins: Structure, Function & Genetics*. **50**: 437-450

# Tem\_f

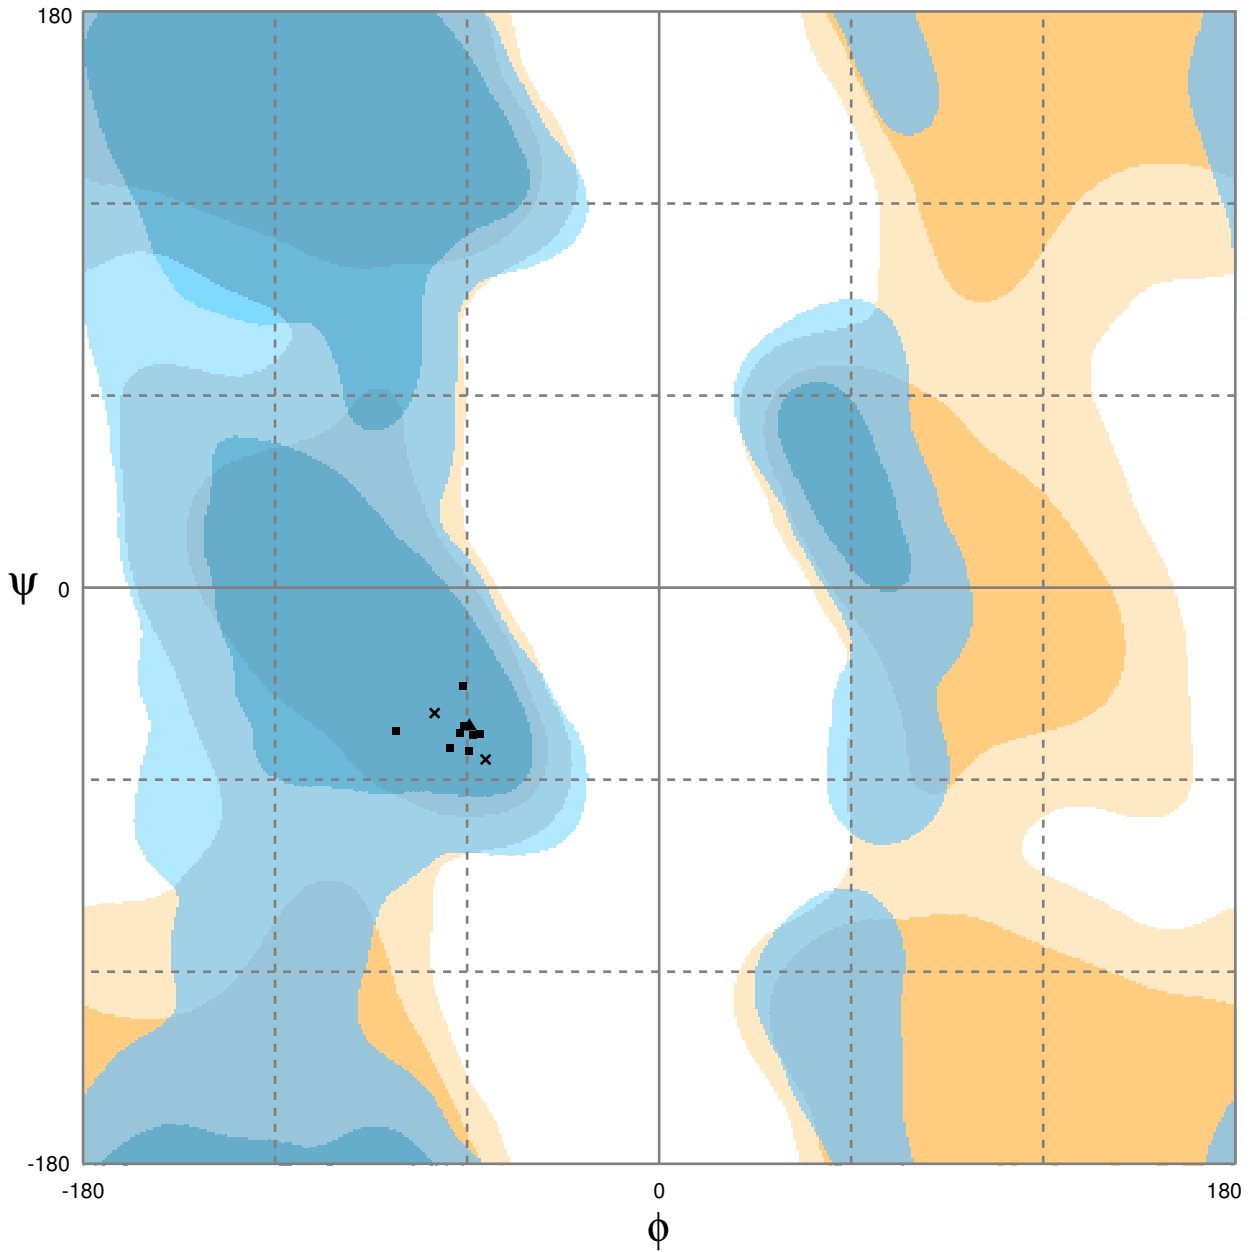

|                                                         |               |
|---------------------------------------------------------|---------------|
| Number of residues in favoured region (~98.0% expected) | : 11 (100.0%) |
| Number of residues in allowed region (~2.0% expected)   | : 0 (0.0%)    |
| Number of residues in outlier region                    | : 0 (0.0%)    |

RAMPAGE by Paul de Bakker and Simon Lovell available at <http://www-cryst.bioc.cam.ac.uk/rampage/>

Please cite: S.C. Lovell, I.W. Davis, W.B. Arendall III, P.I.W. de Bakker, J.M. Word, M.G. Prisant, J.S. Richardson & D.C. Richardson (2002) Structure validation by C $\alpha$  geometry:  $\phi/\psi$  and C $\beta$  deviation. *Proteins: Structure, Function & Genetics*. **50**: 437-450

# Tem\_g

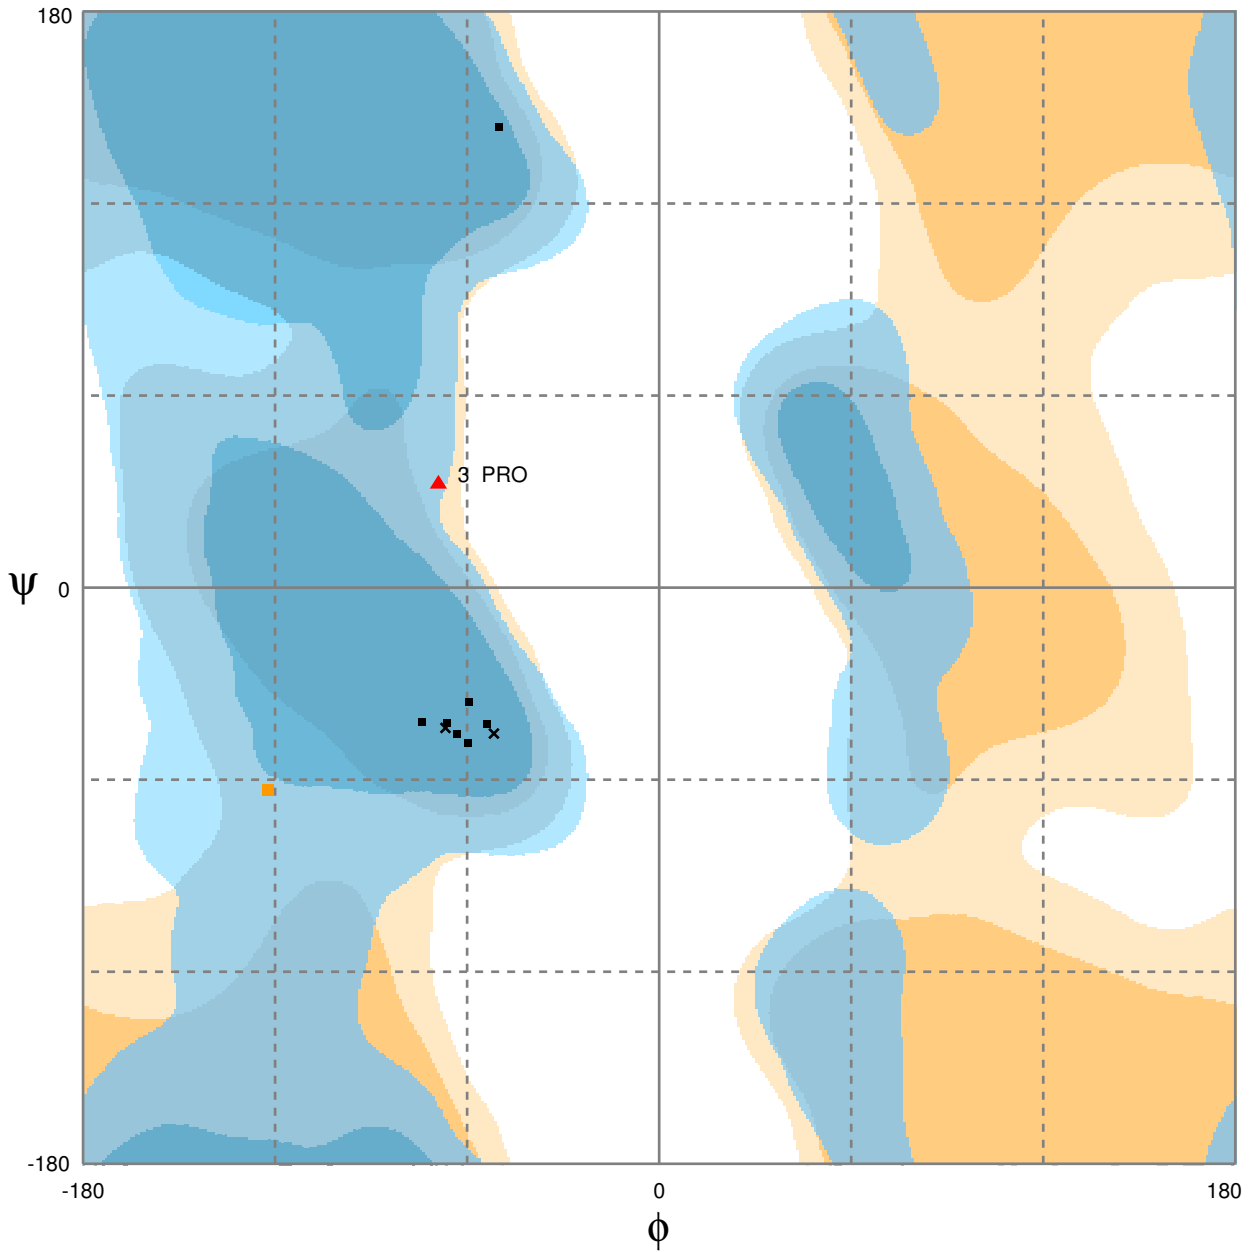

Number of residues in favoured region (~98.0% expected) : 9 (81.8%)  
 Number of residues in allowed region (~2.0% expected) : 1 (9.1%)  
 Number of residues in outlier region : 1 (9.1%)

RAMPAGE by Paul de Bakker and Simon Lovell available at <http://www-cryst.bioc.cam.ac.uk/rampage/>

Please cite: S.C. Lovell, I.W. Davis, W.B. Arendall III, P.I.W. de Bakker, J.M. Word, M.G. Prisant, J.S. Richardson & D.C. Richardson (2002) Structure validation by  $C\alpha$  geometry:  $\phi/\psi$  and  $C\beta$  deviation. *Proteins: Structure, Function & Genetics*. **50**: 437-450

# Tem\_gh

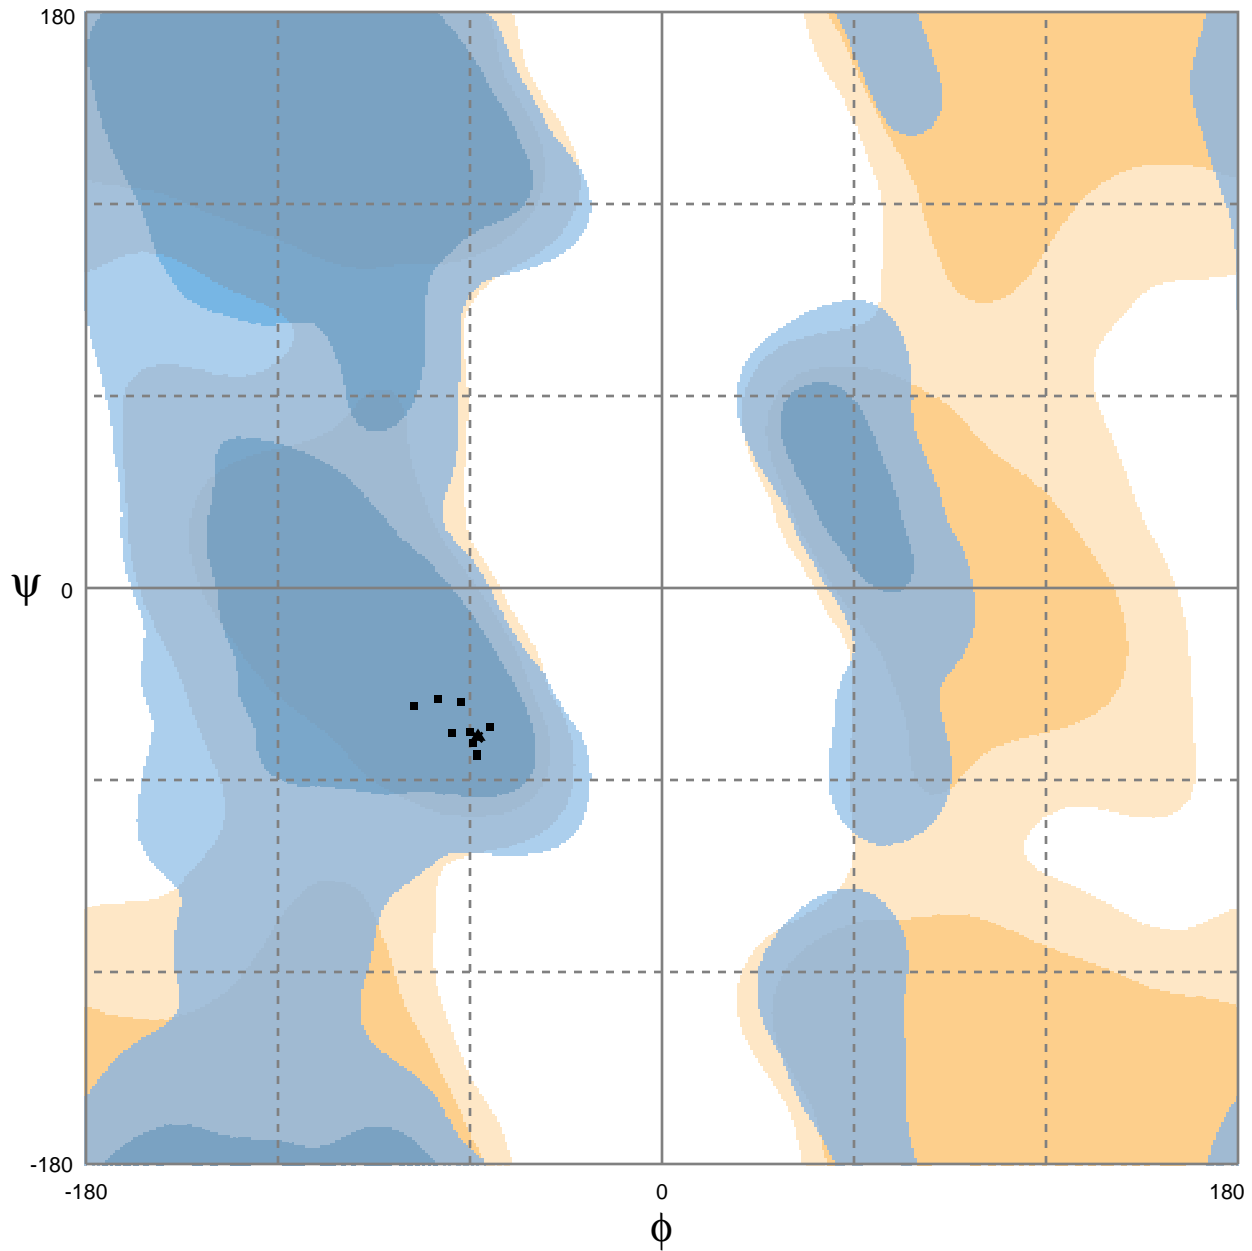

|     |                                  |     |                                 |
|-----|----------------------------------|-----|---------------------------------|
| ■ ▲ | General/Pre-Pro/Proline Favoured | ■ ▲ | General/Pre-Pro/Proline Allowed |
| ×   | Glycine Favoured                 | ×   | Glycine Allowed                 |

Number of residues in favoured region (~98.0% expected) : 11 (100.0%)  
Number of residues in allowed region (~2.0% expected) : 0 (0.0%)  
Number of residues in outlier region : 0 (0.0%)

RAMPAGE by Paul de Bakker and Simon Lovell available at <http://www-cryst.bioc.cam.ac.uk/rampage/>

Please cite: S.C. Lovell, I.W. Davis, W.B. Arendall III, P.I.W. de Bakker, J.M. Word, M.G. Prisant, J.S. Richardson & D.C. Richardson (2002) Structure validation by  $C\alpha$  geometry:  $\phi/\psi$  and  $C\beta$  deviation. *Proteins: Structure, Function & Genetics* **50**: 437-450

# Tem\_gha

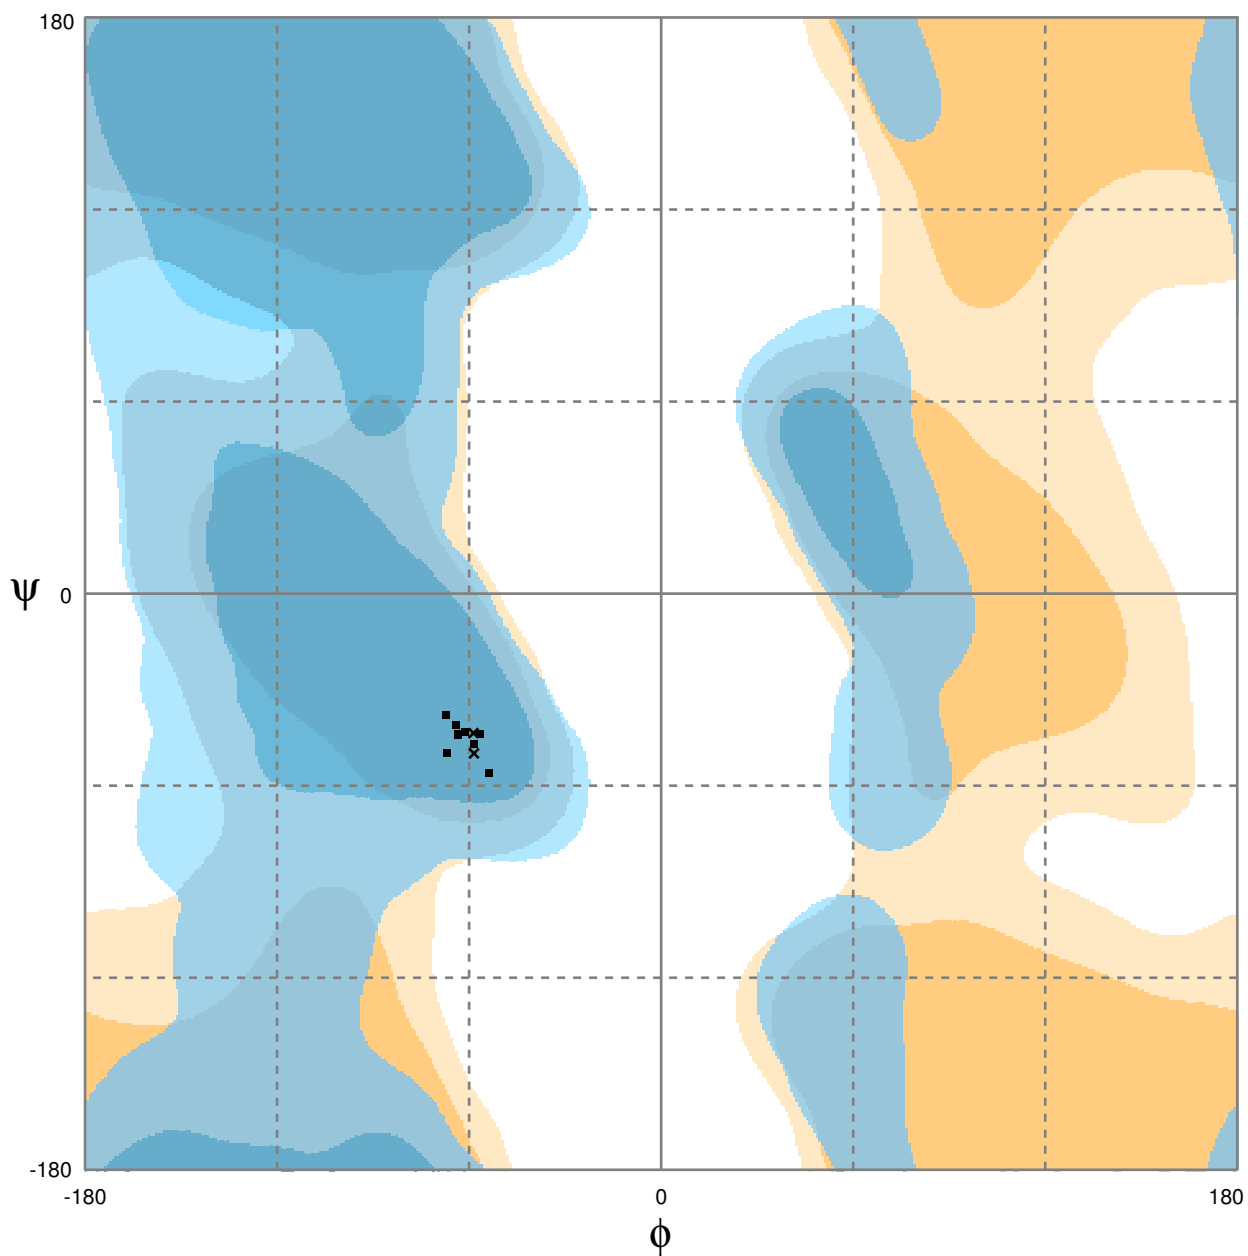

|                                                         |               |
|---------------------------------------------------------|---------------|
| Number of residues in favoured region (~98.0% expected) | : 11 (100.0%) |
| Number of residues in allowed region (~2.0% expected)   | : 0 (0.0%)    |
| Number of residues in outlier region                    | : 0 (0.0%)    |

RAMPAGE by Paul de Bakker and Simon Lovell available at <http://www-cryst.bioc.cam.ac.uk/rampage/>

Please cite: S.C. Lovell, I.W. Davis, W.B. Arendall III, P.I.W. de Bakker, J.M. Word, M.G. Prisant, J.S. Richardson & D.C. Richardson (2002) Structure validation by  $C\alpha$  geometry:  $\phi/\psi$  and  $C\beta$  deviation. *Proteins: Structure, Function & Genetics*. **50**: 437-450

# Tem\_ghb

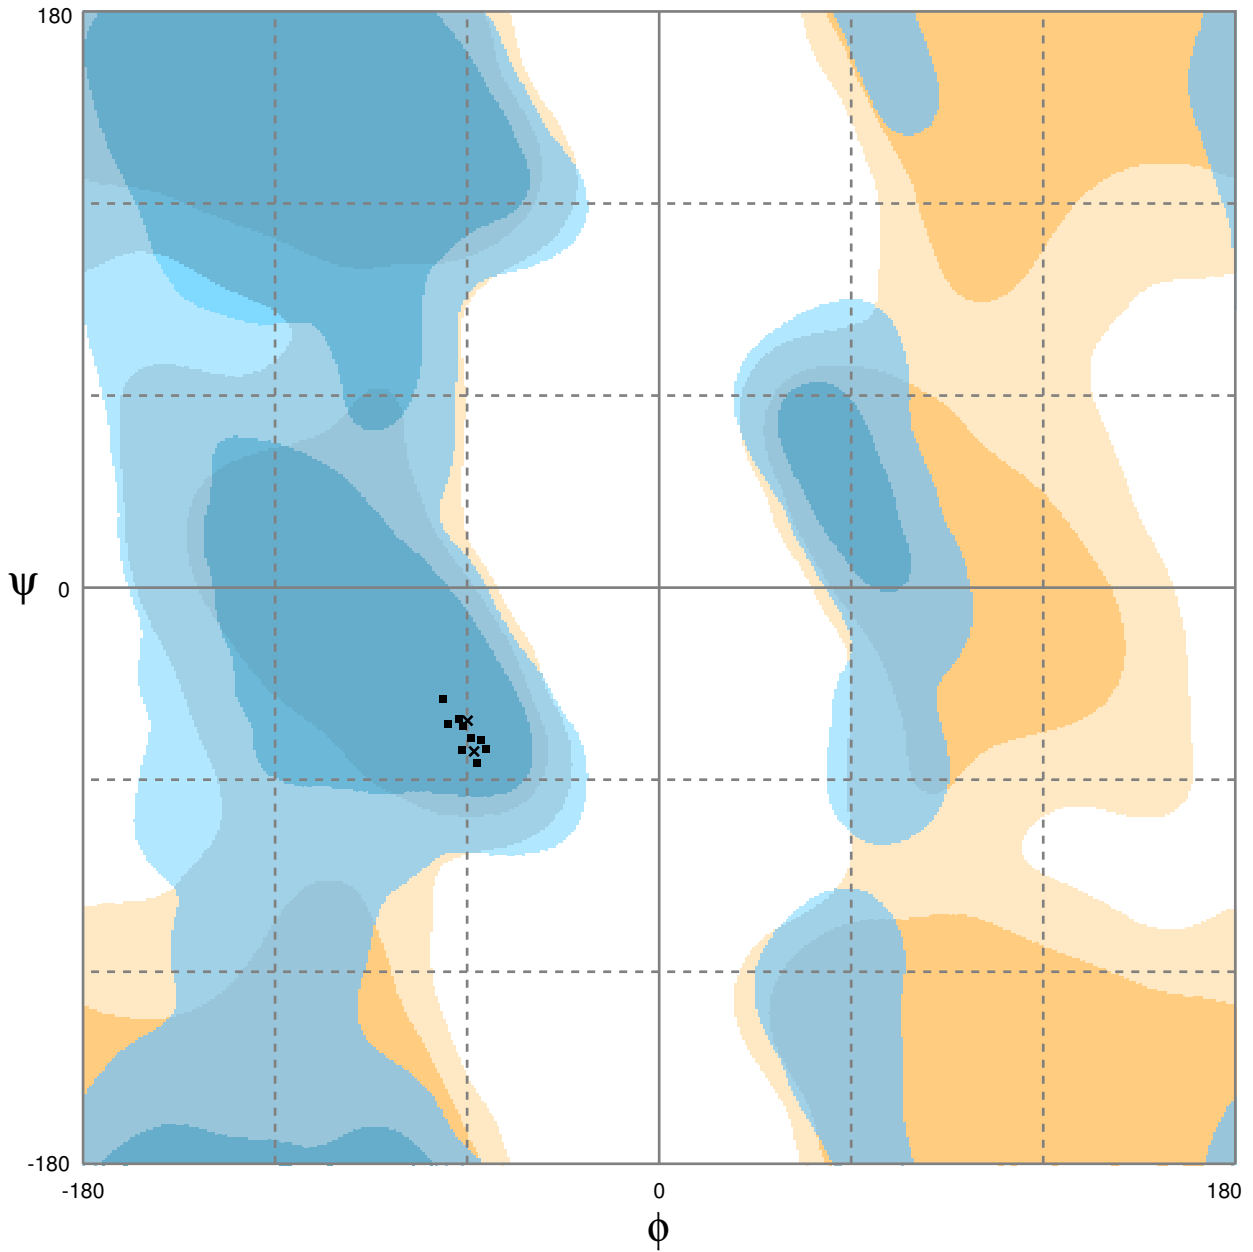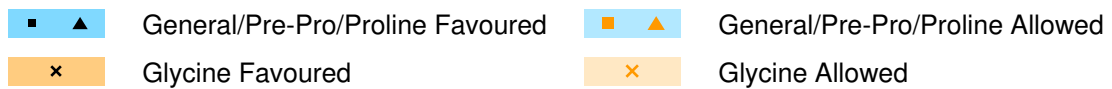

Number of residues in favoured region (~98.0% expected) : 11 (100.0%)  
Number of residues in allowed region (~2.0% expected) : 0 (0.0%)  
Number of residues in outlier region : 0 (0.0%)

RAMPAGE by Paul de Bakker and Simon Lovell available at <http://www-cryst.bioc.cam.ac.uk/rampage/>

Please cite: S.C. Lovell, I.W. Davis, W.B. Arendall III, P.I.W. de Bakker, J.M. Word, M.G. Prisant, J.S. Richardson & D.C. Richardson (2002) Structure validation by  $C\alpha$  geometry:  $\phi/\psi$  and  $C\beta$  deviation. *Proteins: Structure, Function & Genetics*. **50**: 437-450

# Tem\_ghc

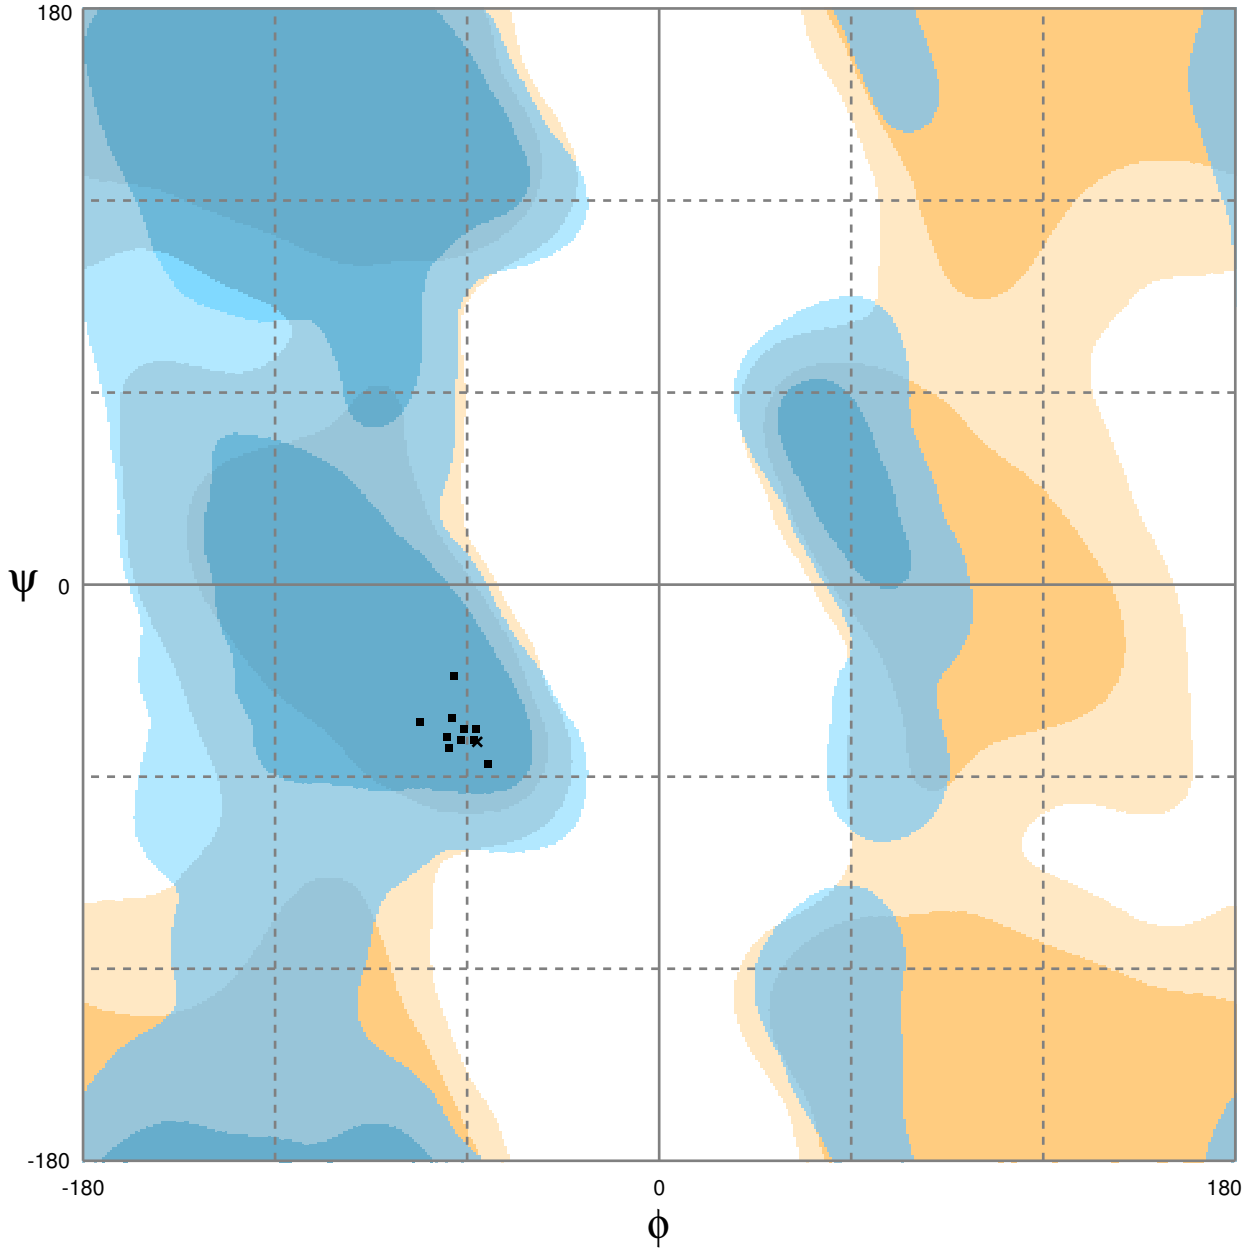

Number of residues in favoured region (~98.0% expected) : 11 (100.0%)  
Number of residues in allowed region (~2.0% expected) : 0 (0.0%)  
Number of residues in outlier region : 0 (0.0%)

RAMPAGE by Paul de Bakker and Simon Lovell available at <http://www-cryst.bioc.cam.ac.uk/rampage/>

Please cite: S.C. Lovell, I.W. Davis, W.B. Arendall III, P.I.W. de Bakker, J.M. Word, M.G. Prisant, J.S. Richardson & D.C. Richardson (2002) Structure validation by  $C\alpha$  geometry:  $\phi/\psi$  and  $C\beta$  deviation. *Proteins: Structure, Function & Genetics*. **50**: 437-450



# Tem\_ghd

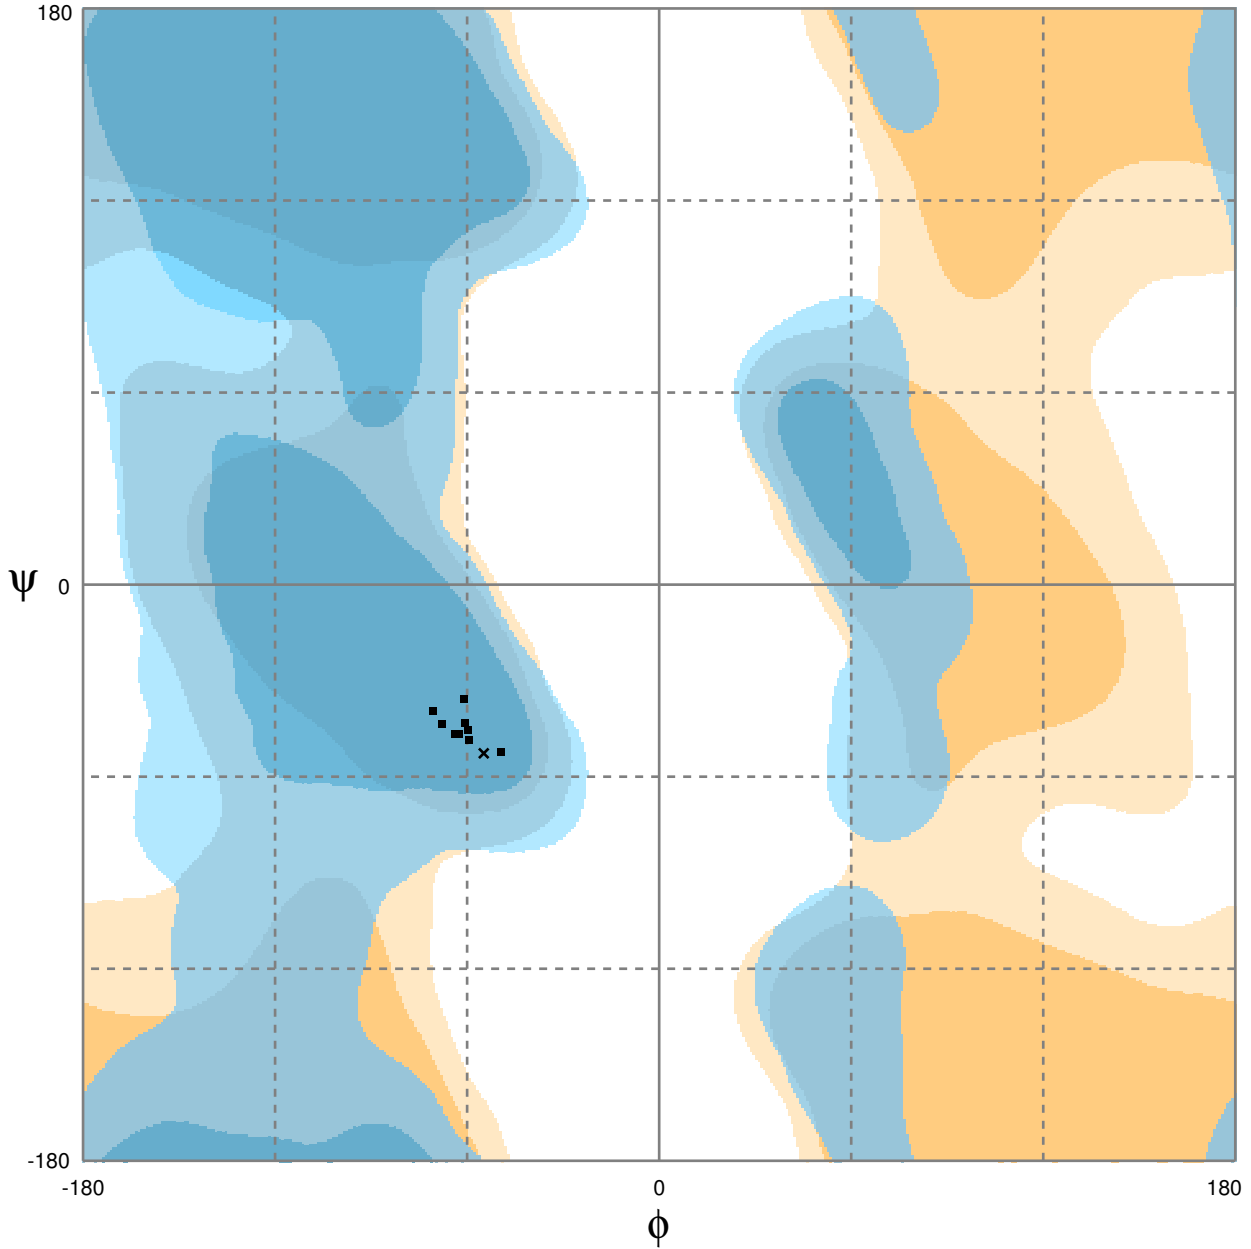

Number of residues in favoured region (~98.0% expected) : 11 (100.0%)  
Number of residues in allowed region (~2.0% expected) : 0 (0.0%)  
Number of residues in outlier region : 0 (0.0%)

RAMPAGE by Paul de Bakker and Simon Lovell available at <http://www-cryst.bioc.cam.ac.uk/rampage/>

Please cite: S.C. Lovell, I.W. Davis, W.B. Arendall III, P.I.W. de Bakker, J.M. Word, M.G. Prisant, J.S. Richardson & D.C. Richardson (2002) Structure validation by  $C\alpha$  geometry:  $\phi/\psi$  and  $C\beta$  deviation. *Proteins: Structure, Function & Genetics*. **50**: 437-450

# Tem\_h

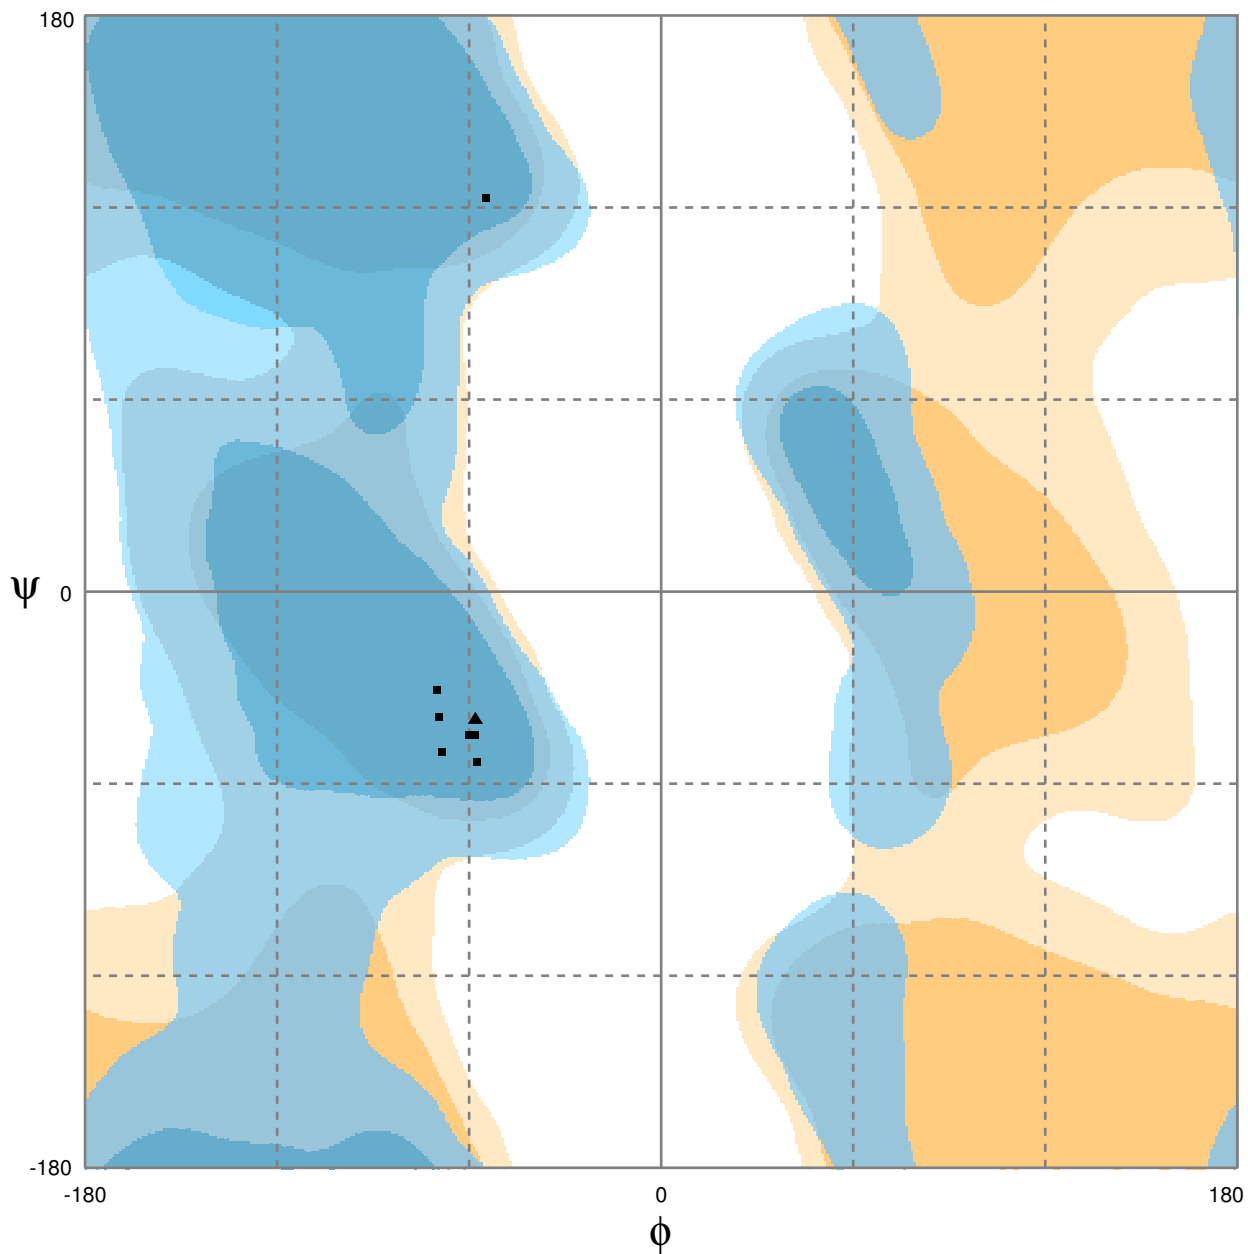

|     |                                  |     |                                 |
|-----|----------------------------------|-----|---------------------------------|
| ■ ▲ | General/Pre-Pro/Proline Favoured | ■ ▲ | General/Pre-Pro/Proline Allowed |
| ×   | Glycine Favoured                 | ×   | Glycine Allowed                 |

|                                                         |              |
|---------------------------------------------------------|--------------|
| Number of residues in favoured region (~98.0% expected) | : 8 (100.0%) |
| Number of residues in allowed region (~2.0% expected)   | : 0 (0.0%)   |
| Number of residues in outlier region                    | : 0 (0.0%)   |

RAMPAGE by Paul de Bakker and Simon Lovell available at <http://www-cryst.bioc.cam.ac.uk/rampage/>

Please cite: S.C. Lovell, I.W. Davis, W.B. Arendall III, P.I.W. de Bakker, J.M. Word, M.G. Prisant, J.S. Richardson & D.C. Richardson (2002) Structure validation by  $C\alpha$  geometry:  $\phi/\psi$  and  $C\beta$  deviation. *Proteins: Structure, Function & Genetics*. **50**: 437-450

# Tem\_hb1

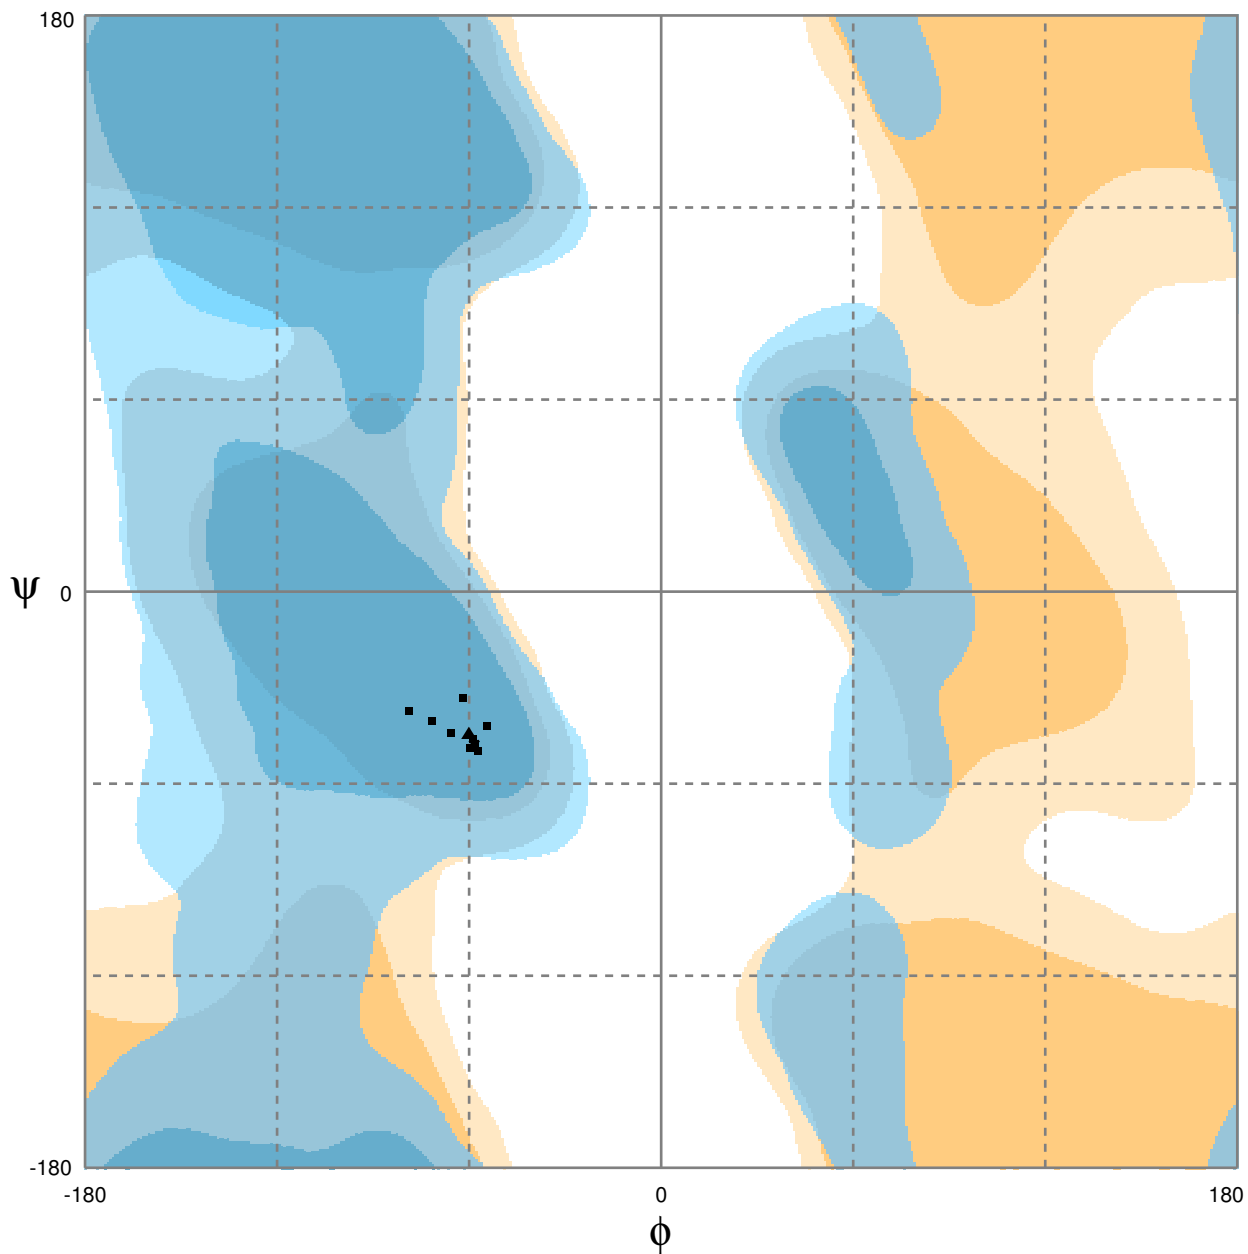

|                                                         |               |
|---------------------------------------------------------|---------------|
| Number of residues in favoured region (~98.0% expected) | : 11 (100.0%) |
| Number of residues in allowed region (~2.0% expected)   | : 0 (0.0%)    |
| Number of residues in outlier region                    | : 0 (0.0%)    |

RAMPAGE by Paul de Bakker and Simon Lovell available at <http://www-cryst.bioc.cam.ac.uk/rampage/>

Please cite: S.C. Lovell, I.W. Davis, W.B. Arendall III, P.I.W. de Bakker, J.M. Word, M.G. Prisant, J.S. Richardson & D.C. Richardson (2002) Structure validation by  $C\alpha$  geometry:  $\phi/\psi$  and  $C\beta$  deviation. *Proteins: Structure, Function & Genetics*. **50**: 437-450

# Tem\_hb2

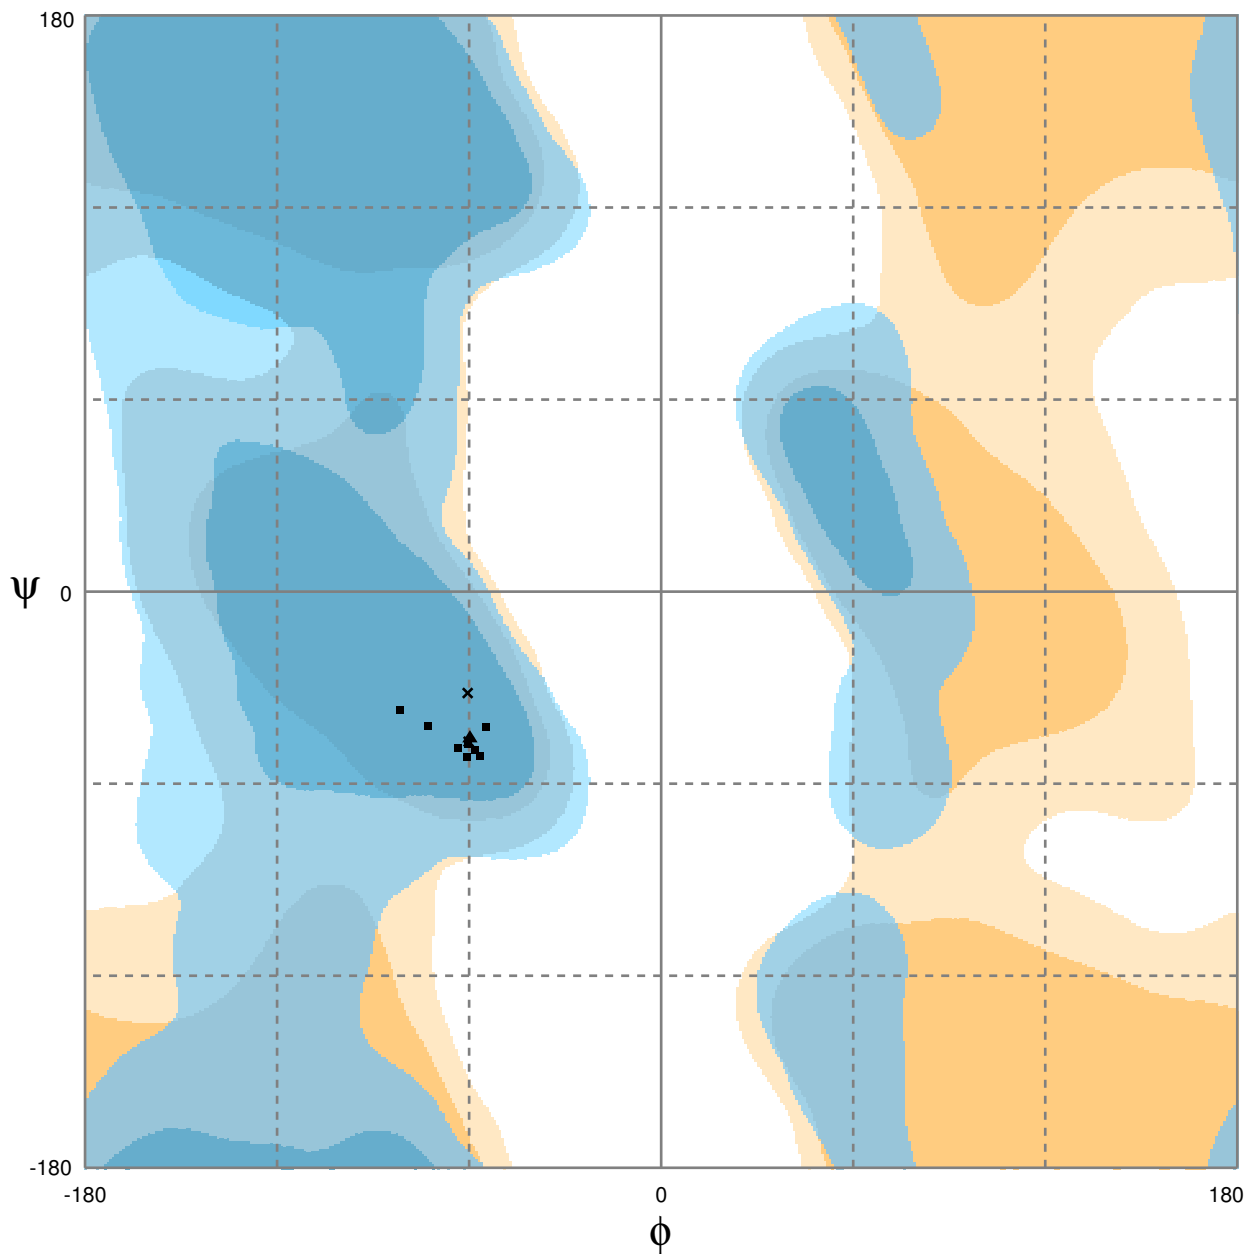

Number of residues in favoured region (~98.0% expected) : 11 (100.0%)  
Number of residues in allowed region (~2.0% expected) : 0 (0.0%)  
Number of residues in outlier region : 0 (0.0%)

RAMPAGE by Paul de Bakker and Simon Lovell available at <http://www-cryst.bioc.cam.ac.uk/rampage/>

Please cite: S.C. Lovell, I.W. Davis, W.B. Arendall III, P.I.W. de Bakker, J.M. Word, M.G. Prisant, J.S. Richardson & D.C. Richardson (2002) Structure validation by  $C\alpha$  geometry:  $\phi/\psi$  and  $C\beta$  deviation. *Proteins: Structure, Function & Genetics*. **50**: 437-450

# Tem\_hn1

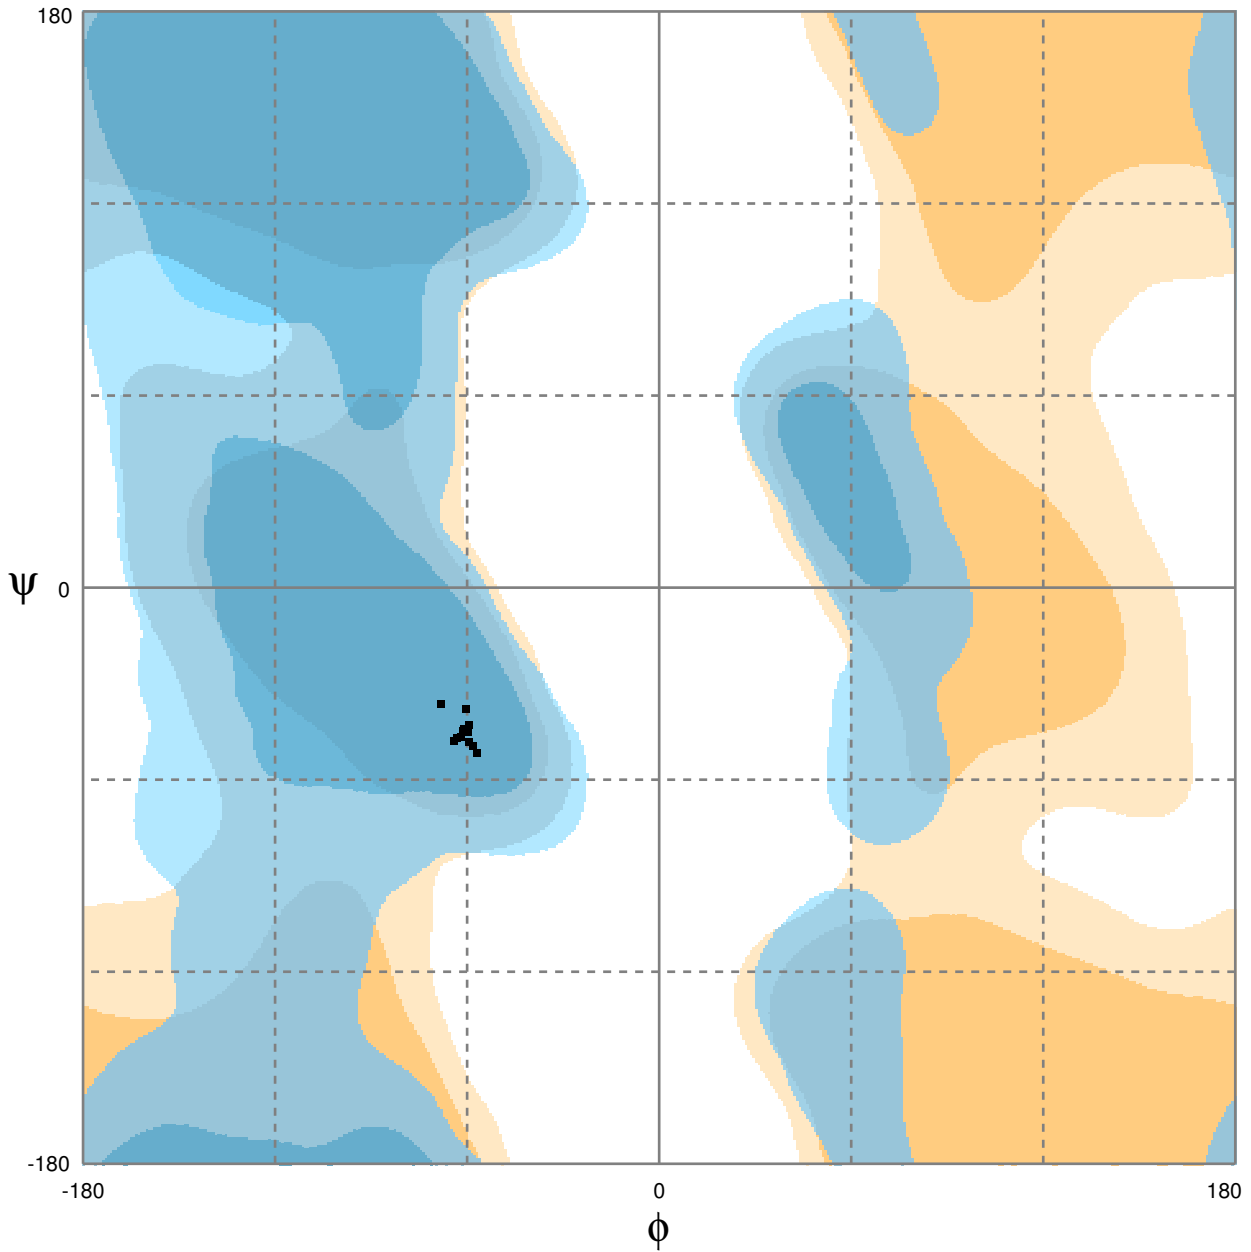

|                                                         |               |
|---------------------------------------------------------|---------------|
| Number of residues in favoured region (~98.0% expected) | : 12 (100.0%) |
| Number of residues in allowed region (~2.0% expected)   | : 0 (0.0%)    |
| Number of residues in outlier region                    | : 0 (0.0%)    |

RAMPAGE by Paul de Bakker and Simon Lovell available at <http://www-cryst.bioc.cam.ac.uk/rampage/>

Please cite: S.C. Lovell, I.W. Davis, W.B. Arendall III, P.I.W. de Bakker, J.M. Word, M.G. Prisant, J.S. Richardson & D.C. Richardson (2002) Structure validation by  $C\alpha$  geometry:  $\phi/\psi$  and  $C\beta$  deviation. *Proteins: Structure, Function & Genetics*. **50**: 437-450

# Tem\_hn2

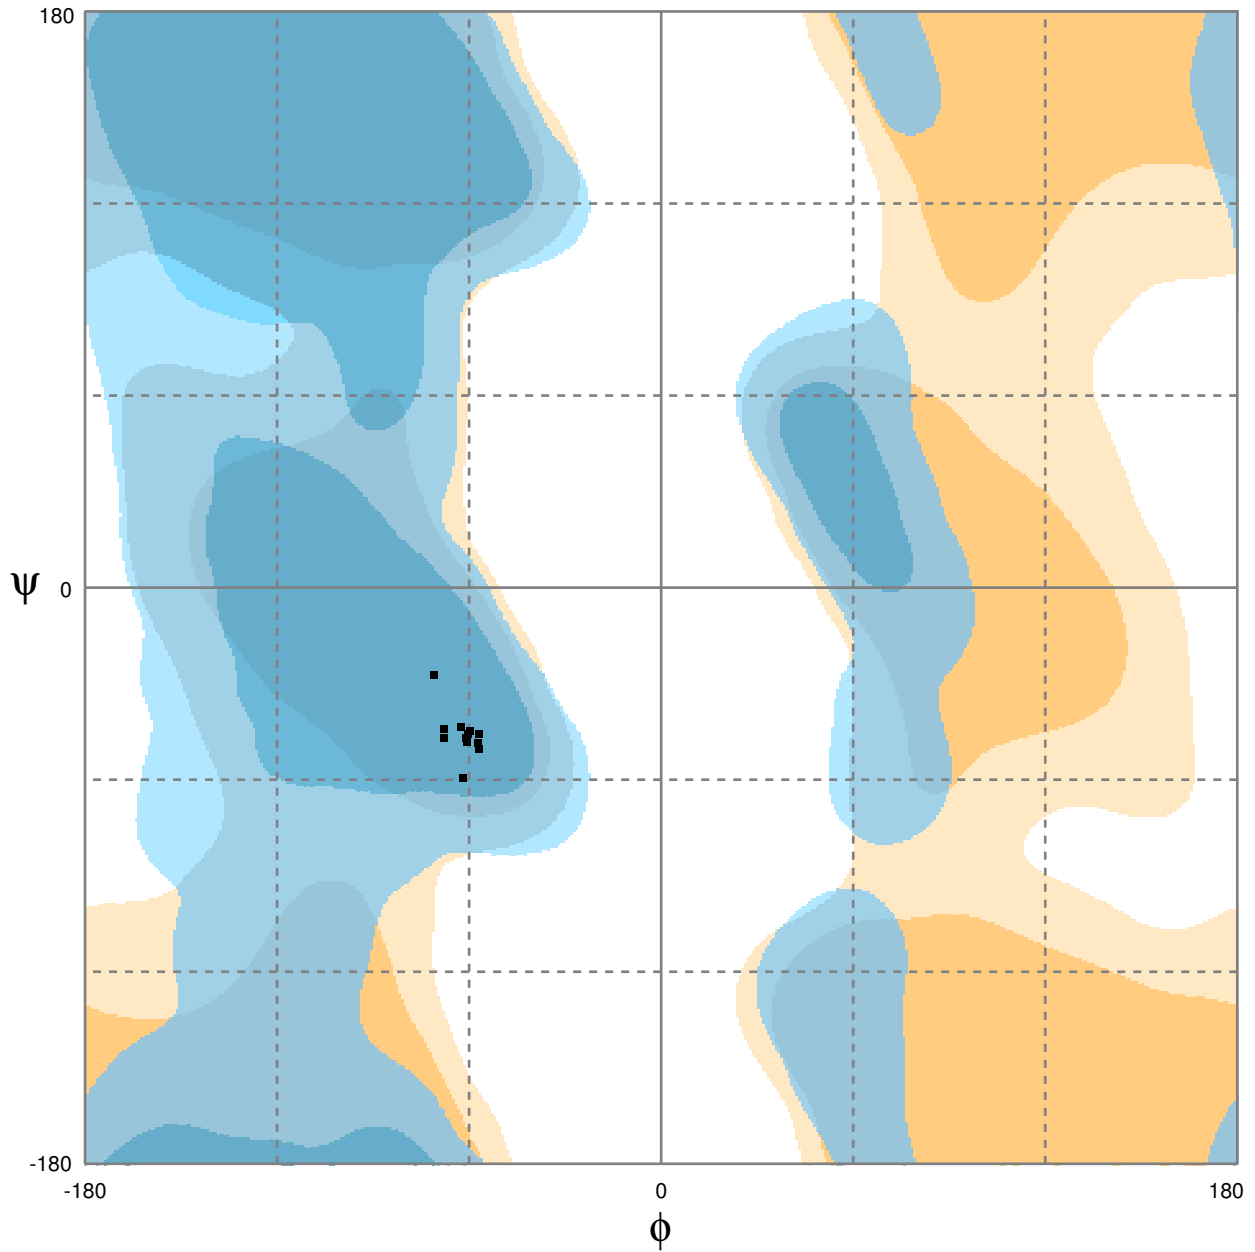

|                                                         |               |
|---------------------------------------------------------|---------------|
| Number of residues in favoured region (~98.0% expected) | : 12 (100.0%) |
| Number of residues in allowed region (~2.0% expected)   | : 0 (0.0%)    |
| Number of residues in outlier region                    | : 0 (0.0%)    |

RAMPAGE by Paul de Bakker and Simon Lovell available at <http://www-cryst.bioc.cam.ac.uk/rampage/>

Please cite: S.C. Lovell, I.W. Davis, W.B. Arendall III, P.I.W. de Bakker, J.M. Word, M.G. Prisant, J.S. Richardson & D.C. Richardson (2002) Structure validation by C $\alpha$  geometry:  $\phi/\psi$  and C $\beta$  deviation. *Proteins: Structure, Function & Genetics*. **50**: 437-450

# Tem\_ita

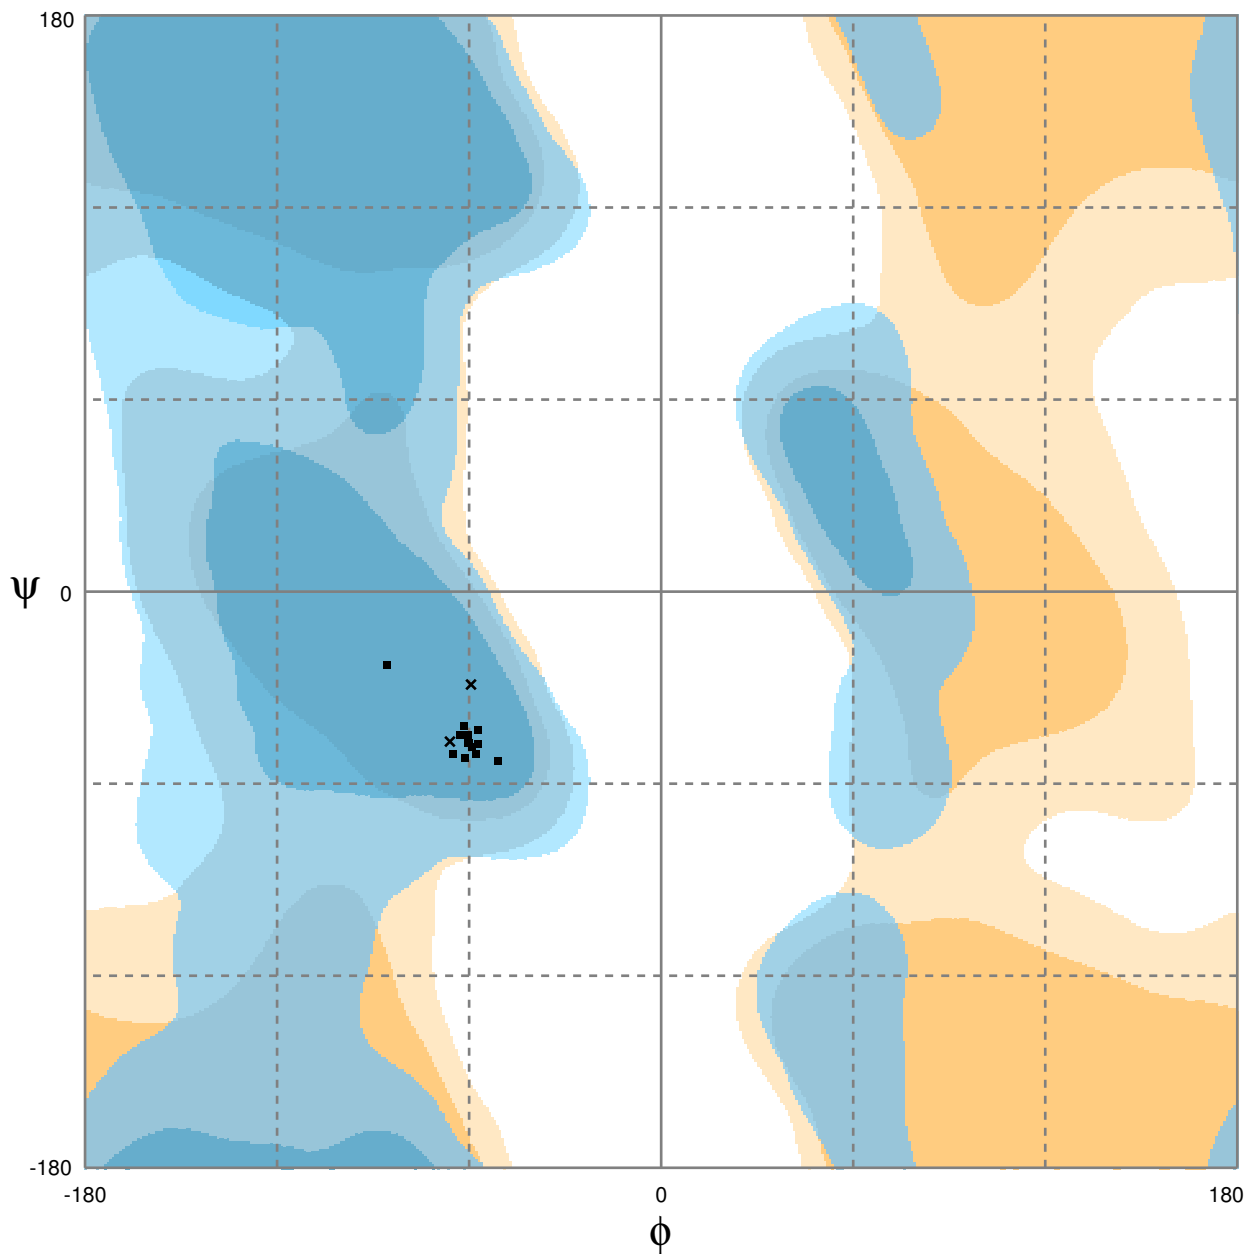

Number of residues in favoured region (~98.0% expected) : 15 (100.0%)  
Number of residues in allowed region (~2.0% expected) : 0 (0.0%)  
Number of residues in outlier region : 0 (0.0%)

RAMPAGE by Paul de Bakker and Simon Lovell available at <http://www-cryst.bioc.cam.ac.uk/rampage/>

Please cite: S.C. Lovell, I.W. Davis, W.B. Arendall III, P.I.W. de Bakker, J.M. Word, M.G. Prisant, J.S. Richardson & D.C. Richardson (2002) Structure validation by  $C\alpha$  geometry:  $\phi/\psi$  and  $C\beta$  deviation. *Proteins: Structure, Function & Genetics*. **50**: 437-450

# Tem\_k

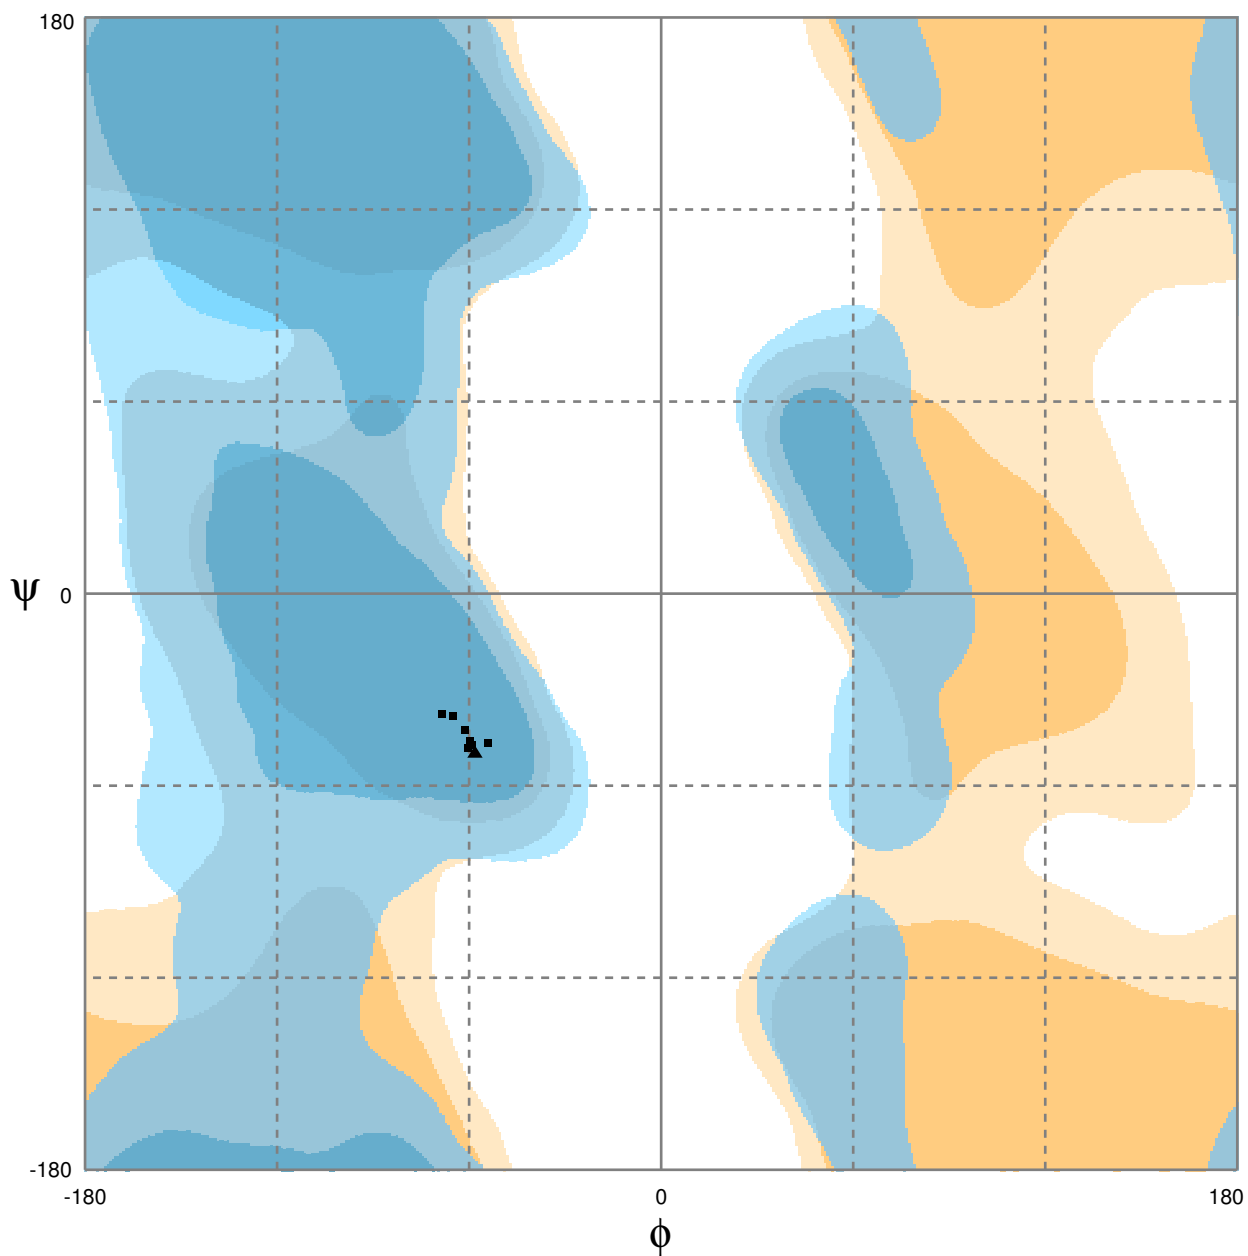

Number of residues in favoured region (~98.0% expected) : 8 (100.0%)  
Number of residues in allowed region (~2.0% expected) : 0 (0.0%)  
Number of residues in outlier region : 0 (0.0%)

RAMPAGE by Paul de Bakker and Simon Lovell available at <http://www-cryst.bioc.cam.ac.uk/rampage/>

Please cite: S.C. Lovell, I.W. Davis, W.B. Arendall III, P.I.W. de Bakker, J.M. Word, M.G. Prisant, J.S. Richardson & D.C. Richardson (2002) Structure validation by  $C\alpha$  geometry:  $\phi/\psi$  and  $C\beta$  deviation. *Proteins: Structure, Function & Genetics*. **50**: 437-450



# Tem\_1

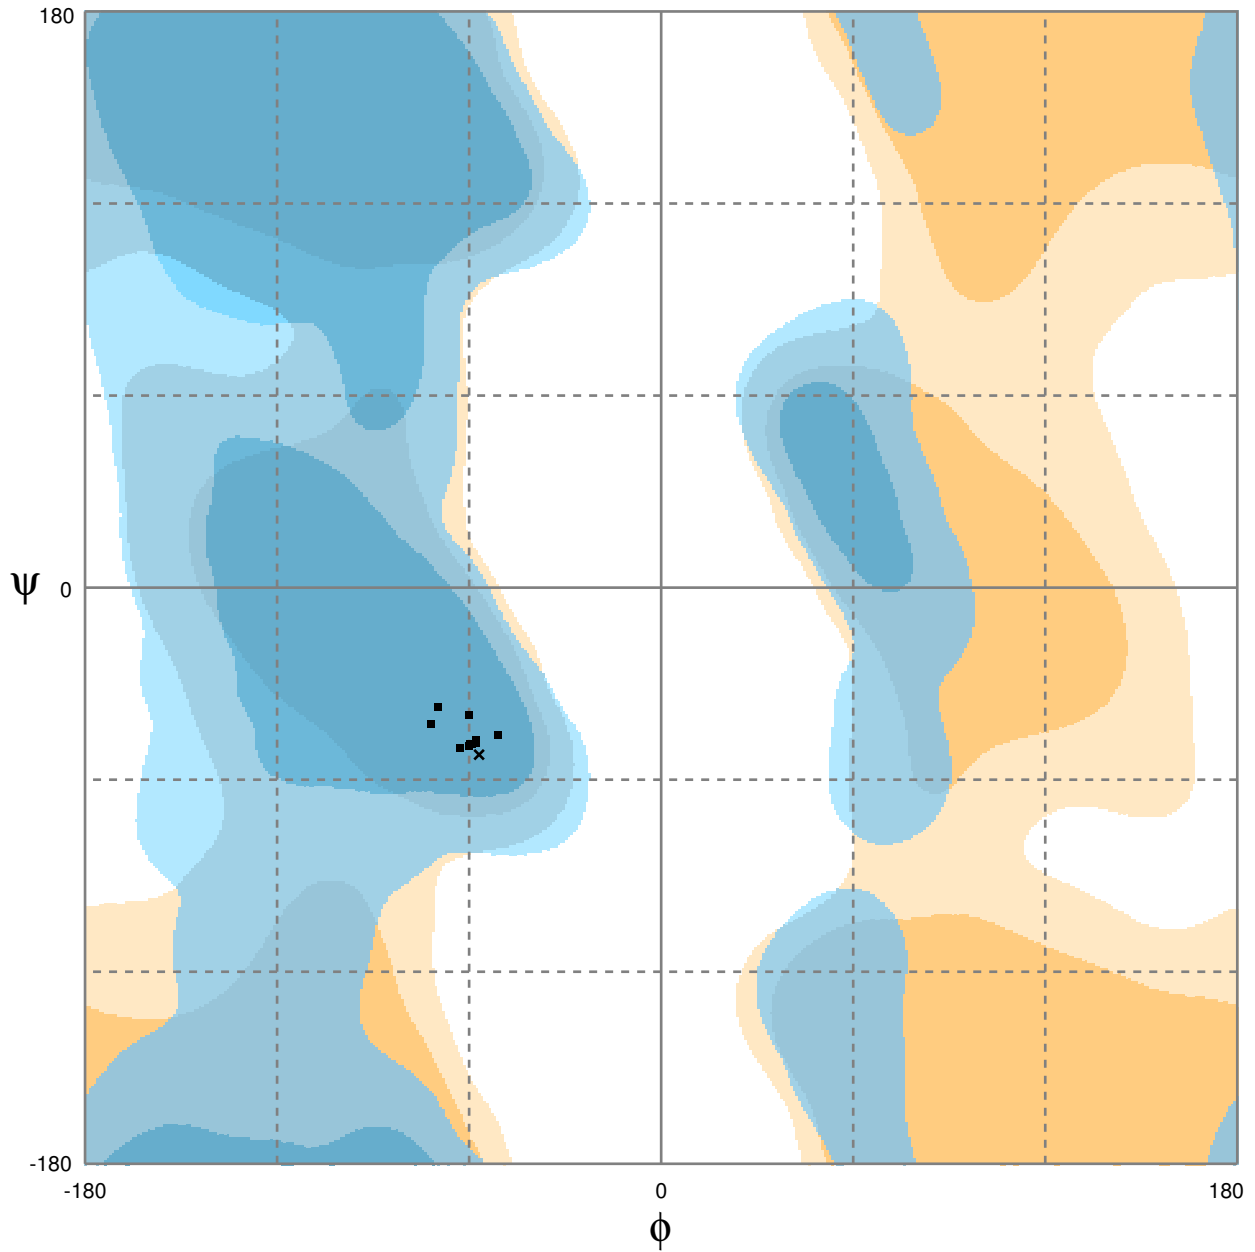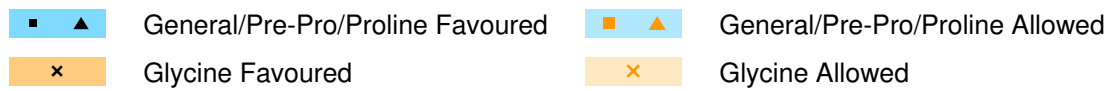

Number of residues in favoured region (~98.0% expected) : 11 (100.0%)  
Number of residues in allowed region (~2.0% expected) : 0 (0.0%)  
Number of residues in outlier region : 0 (0.0%)

RAMPAGE by Paul de Bakker and Simon Lovell available at <http://www-cryst.bioc.cam.ac.uk/rampage/>

Please cite: S.C. Lovell, I.W. Davis, W.B. Arendall III, P.I.W. de Bakker, J.M. Word, M.G. Prisant, J.S. Richardson & D.C. Richardson (2002) Structure validation by  $C\alpha$  geometry:  $\phi/\psi$  and  $C\beta$  deviation. *Proteins: Structure, Function & Genetics*. **50**: 437-450

# Tem\_la

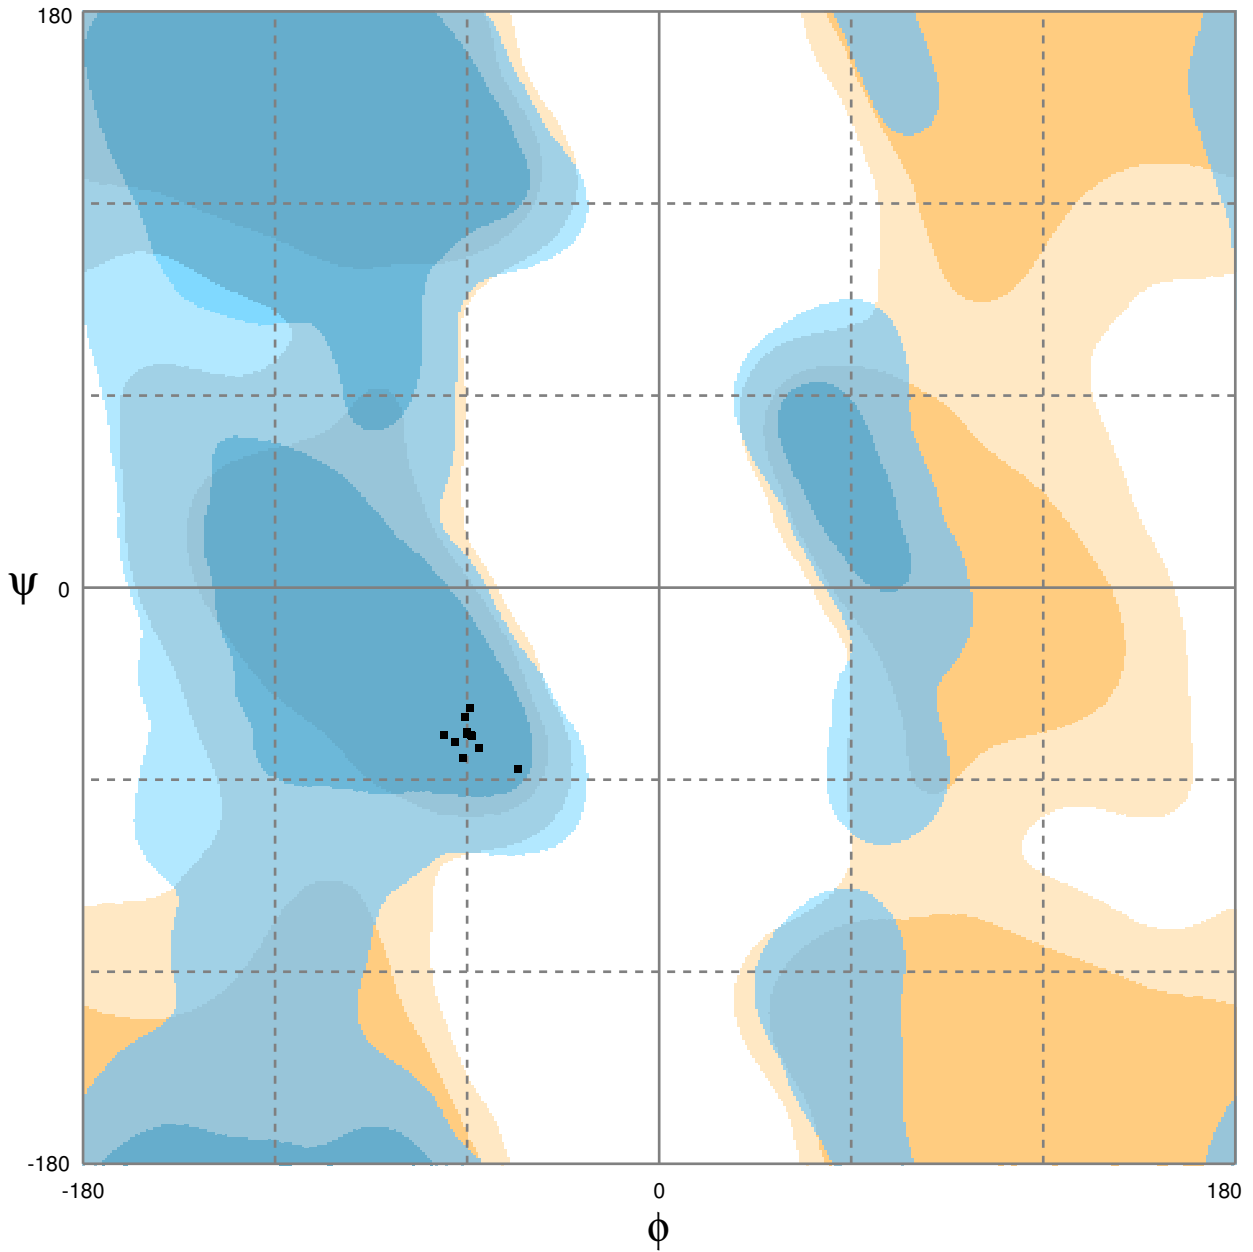

|                                                         |               |
|---------------------------------------------------------|---------------|
| Number of residues in favoured region (~98.0% expected) | : 11 (100.0%) |
| Number of residues in allowed region (~2.0% expected)   | : 0 (0.0%)    |
| Number of residues in outlier region                    | : 0 (0.0%)    |

RAMPAGE by Paul de Bakker and Simon Lovell available at <http://www-cryst.bioc.cam.ac.uk/rampage/>

Please cite: S.C. Lovell, I.W. Davis, W.B. Arendall III, P.I.W. de Bakker, J.M. Word, M.G. Prisant, J.S. Richardson & D.C. Richardson (2002) Structure validation by  $C\alpha$  geometry:  $\phi/\psi$  and  $C\beta$  deviation. *Proteins: Structure, Function & Genetics*. **50**: 437-450

# Tem\_lf1

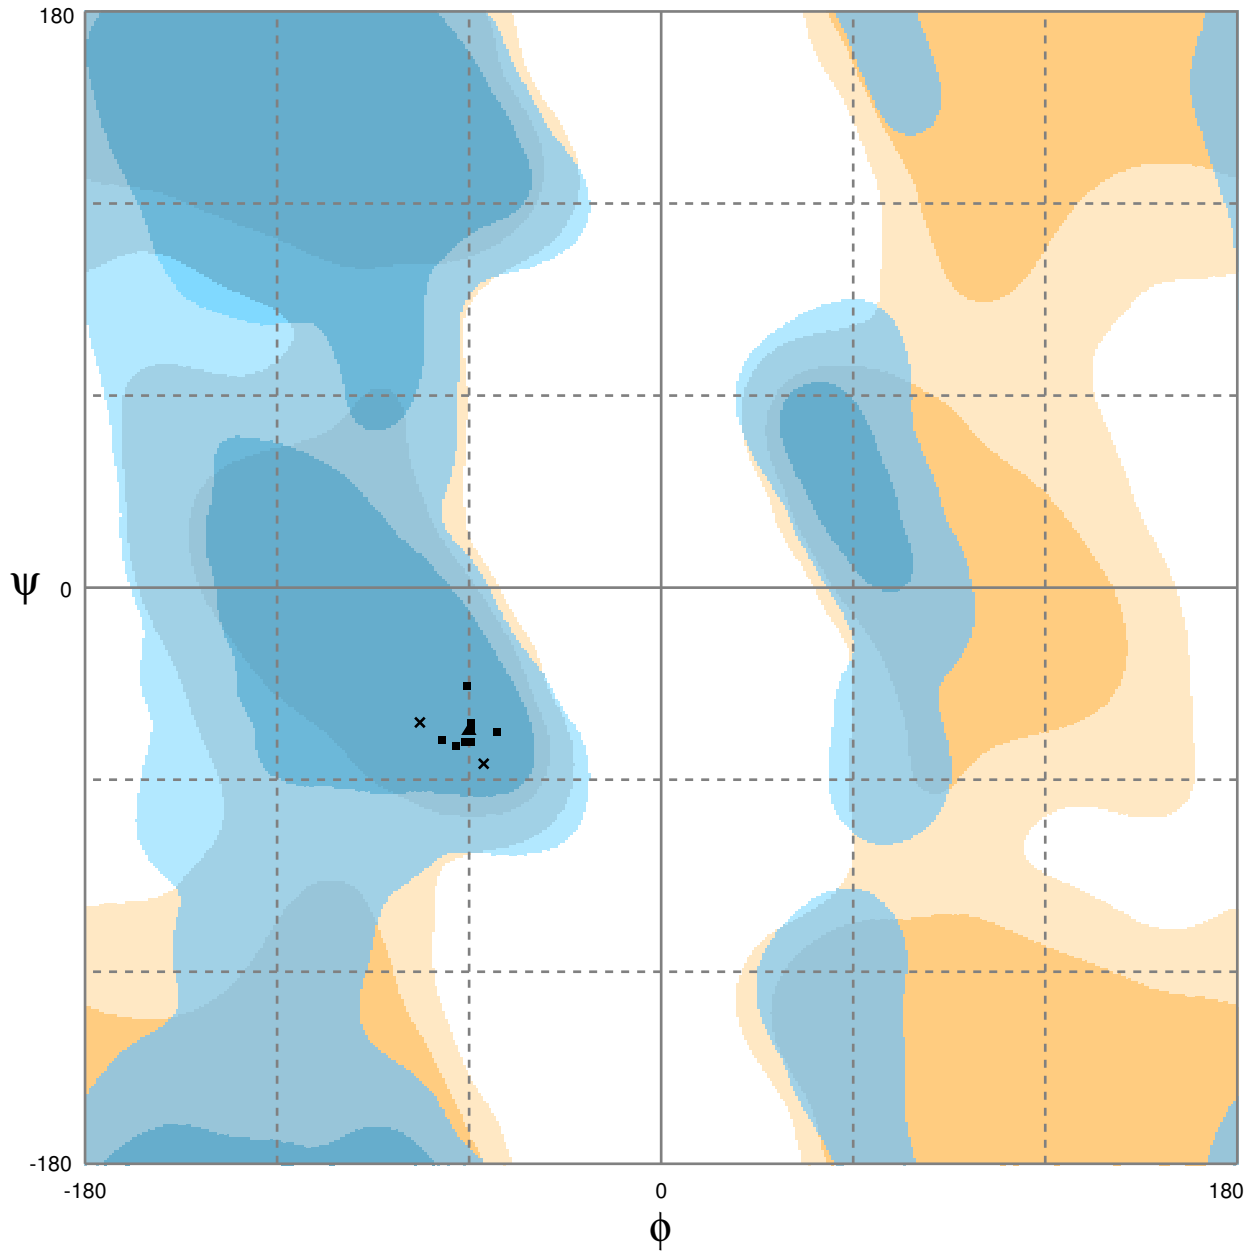

|                                                         |               |
|---------------------------------------------------------|---------------|
| Number of residues in favoured region (~98.0% expected) | : 11 (100.0%) |
| Number of residues in allowed region (~2.0% expected)   | : 0 (0.0%)    |
| Number of residues in outlier region                    | : 0 (0.0%)    |

RAMPAGE by Paul de Bakker and Simon Lovell available at <http://www-cryst.bioc.cam.ac.uk/rampage/>

Please cite: S.C. Lovell, I.W. Davis, W.B. Arendall III, P.I.W. de Bakker, J.M. Word, M.G. Prisant, J.S. Richardson & D.C. Richardson (2002) Structure validation by  $C\alpha$  geometry:  $\phi/\psi$  and  $C\beta$  deviation. *Proteins: Structure, Function & Genetics*. **50**: 437-450

# Tem\_lk1

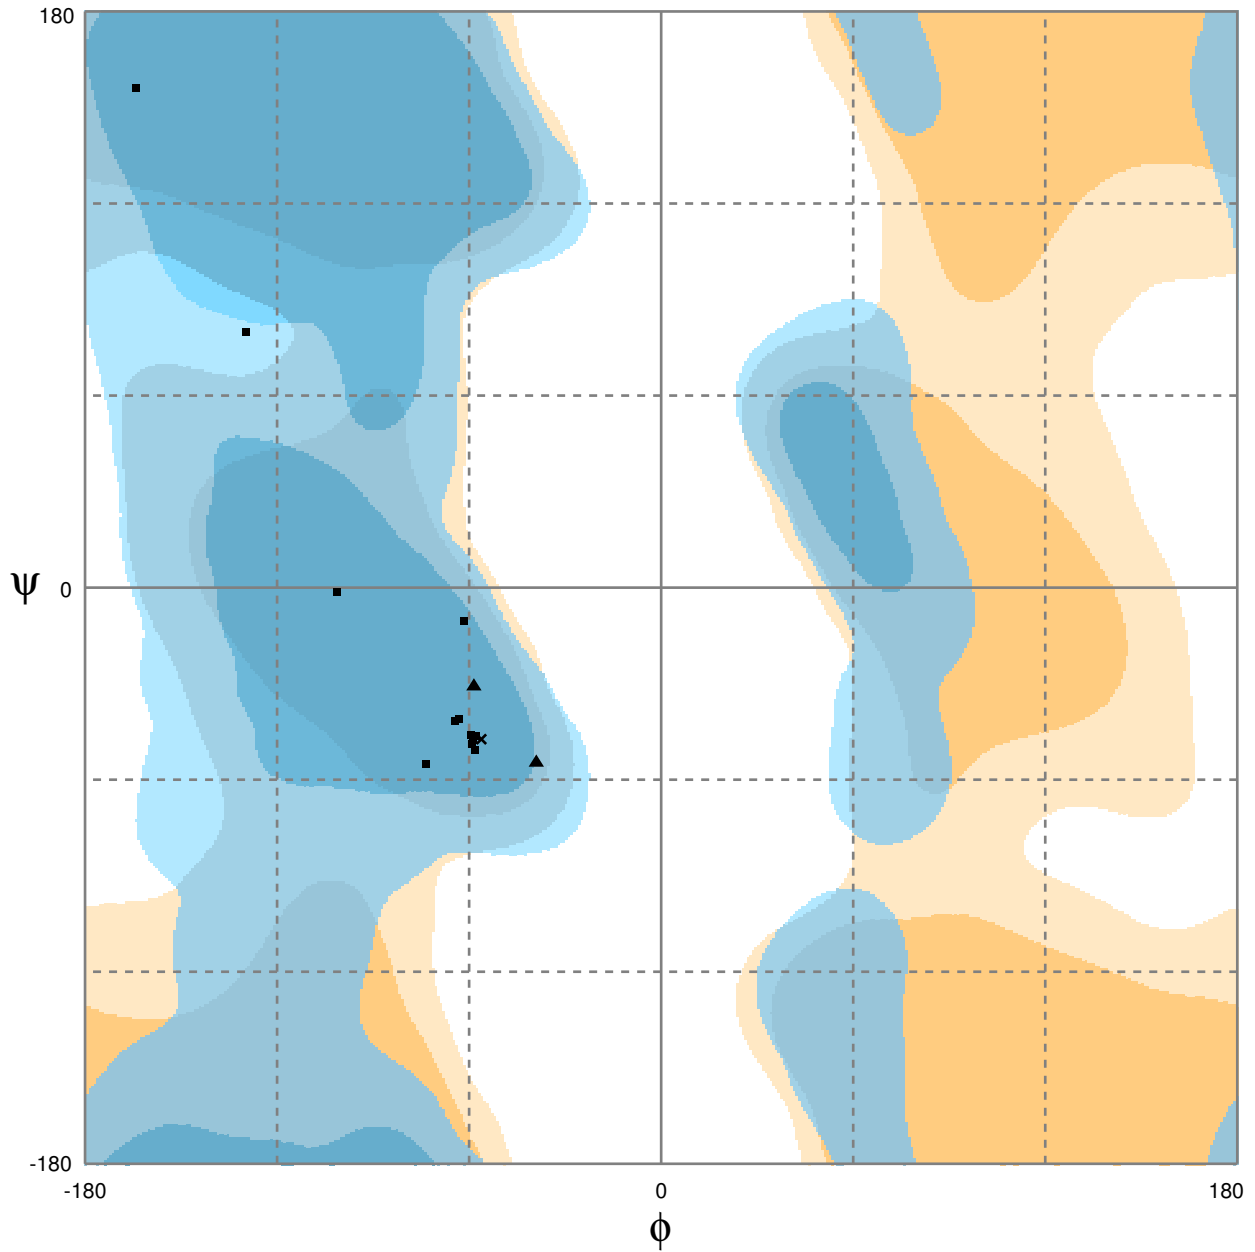

|                                                         |               |
|---------------------------------------------------------|---------------|
| Number of residues in favoured region (~98.0% expected) | : 15 (100.0%) |
| Number of residues in allowed region (~2.0% expected)   | : 0 (0.0%)    |
| Number of residues in outlier region                    | : 0 (0.0%)    |

RAMPAGE by Paul de Bakker and Simon Lovell available at <http://www-cryst.bioc.cam.ac.uk/rampage/>

Please cite: S.C. Lovell, I.W. Davis, W.B. Arendall III, P.I.W. de Bakker, J.M. Word, M.G. Prisant, J.S. Richardson & D.C. Richardson (2002) Structure validation by  $C\alpha$  geometry:  $\phi/\psi$  and  $C\beta$  deviation. *Proteins: Structure, Function & Genetics*. **50**: 437-450

# Tem\_lt1

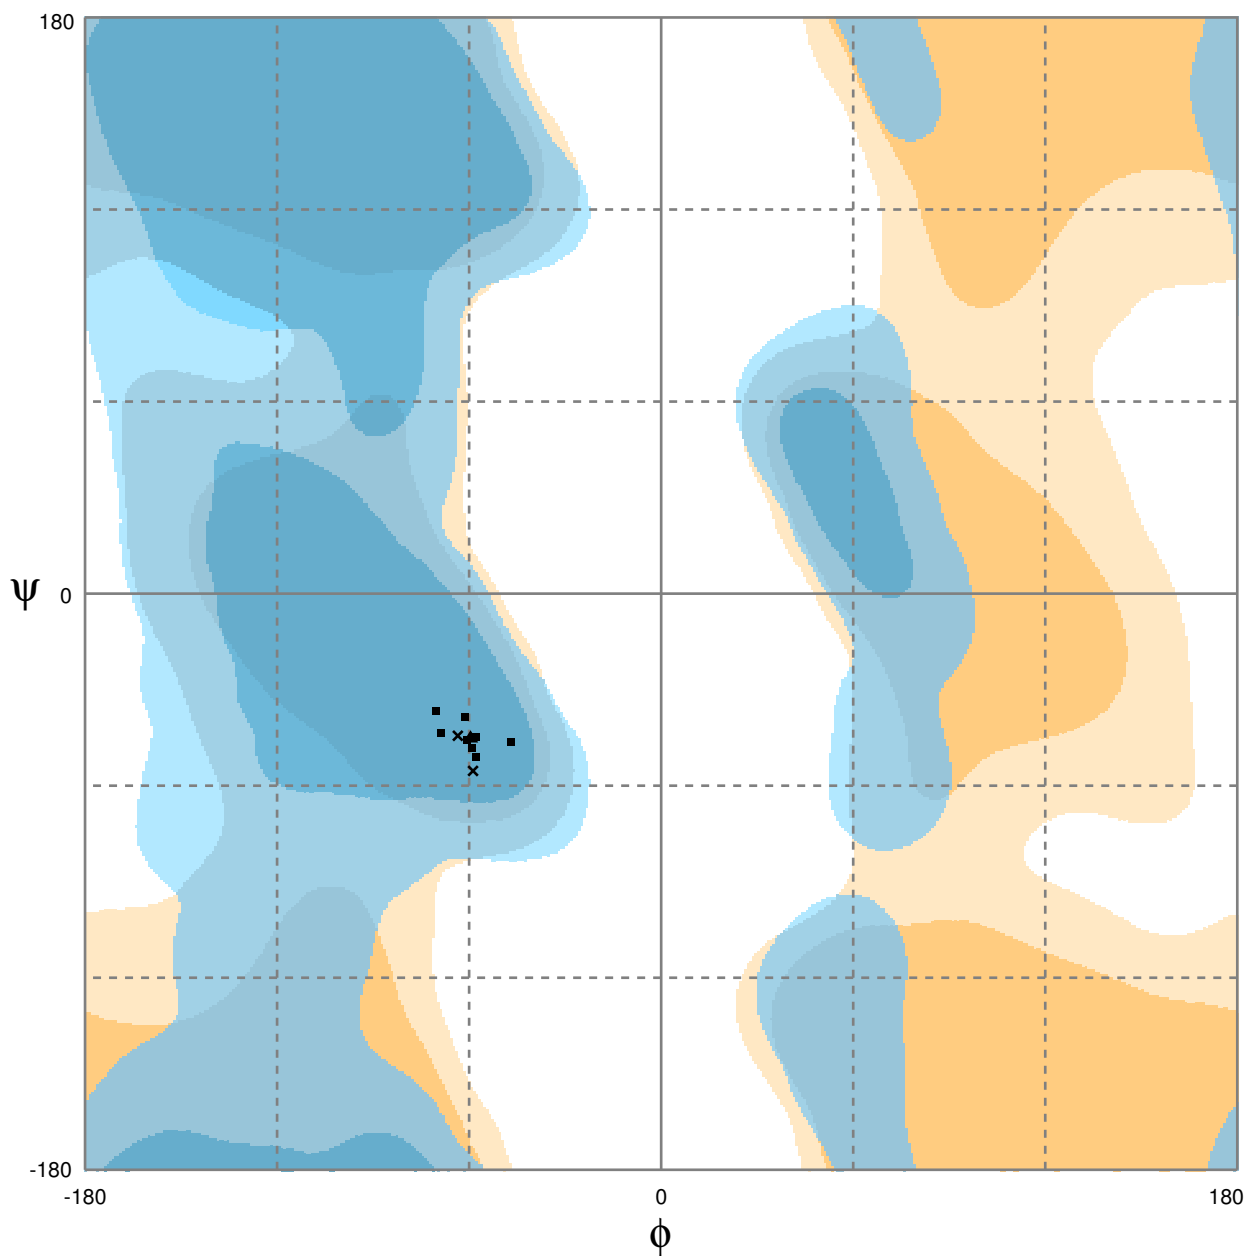

Number of residues in favoured region (~98.0% expected) : 11 (100.0%)  
Number of residues in allowed region (~2.0% expected) : 0 (0.0%)  
Number of residues in outlier region : 0 (0.0%)

RAMPAGE by Paul de Bakker and Simon Lovell available at <http://www-cryst.bioc.cam.ac.uk/rampage/>

Please cite: S.C. Lovell, I.W. Davis, W.B. Arendall III, P.I.W. de Bakker, J.M. Word, M.G. Prisant, J.S. Richardson & D.C. Richardson (2002) Structure validation by  $C\alpha$  geometry:  $\phi/\psi$  and  $C\beta$  deviation. *Proteins: Structure, Function & Genetics*. **50**: 437-450

# Tem\_lt2

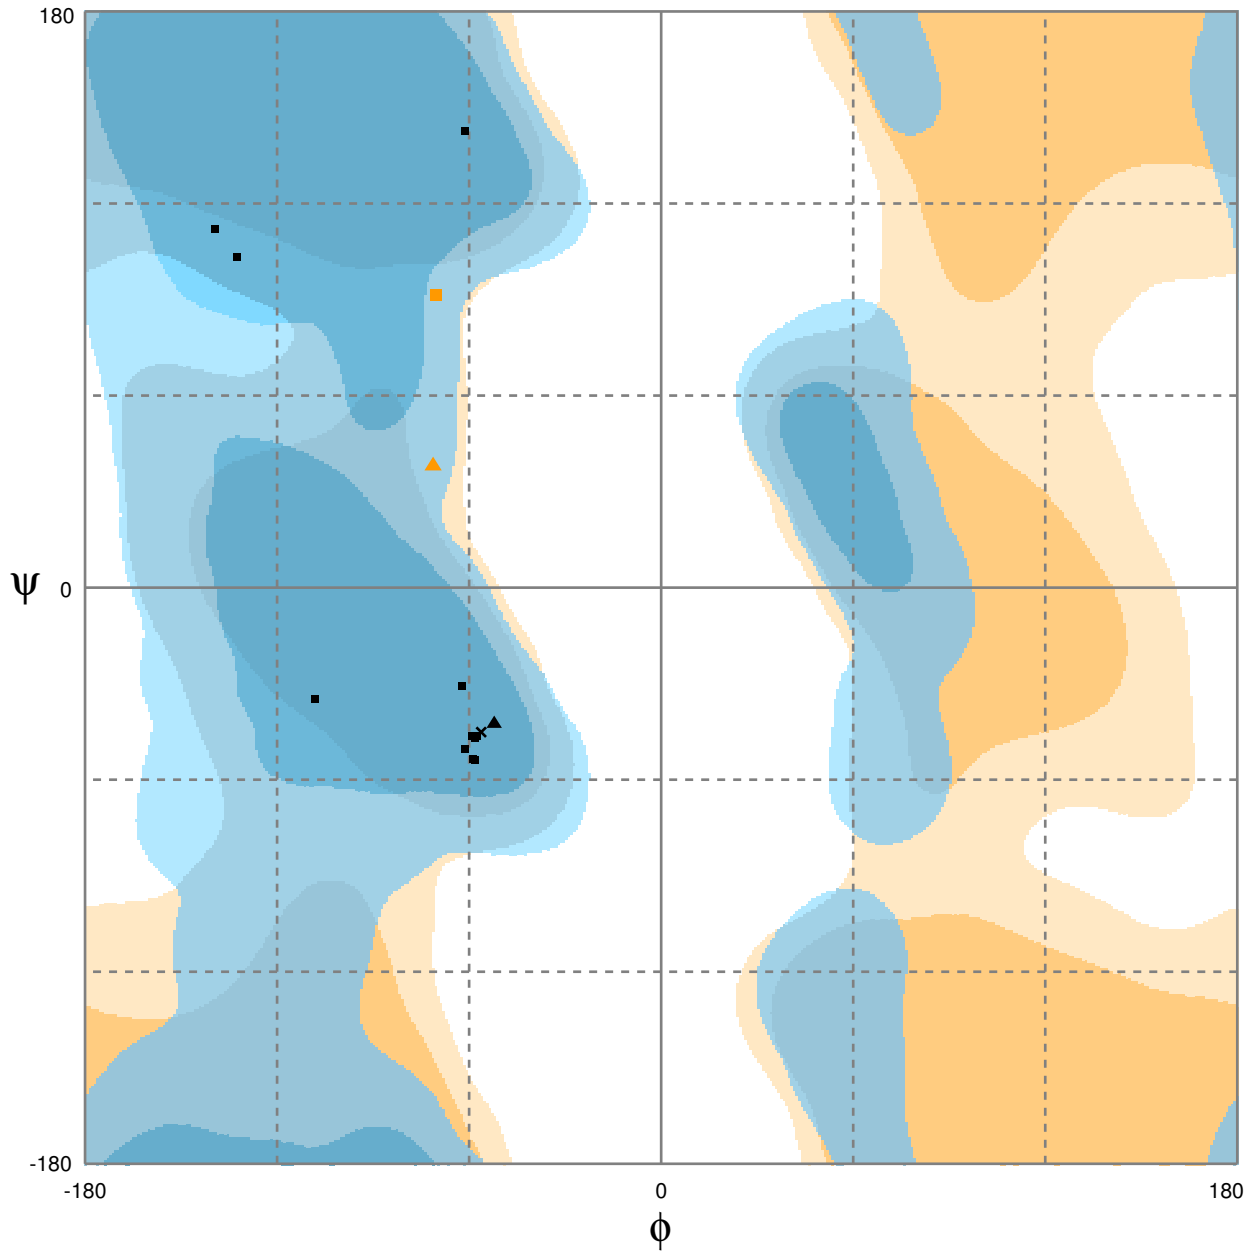

Number of residues in favoured region (~98.0% expected) : 13 (86.7%)  
 Number of residues in allowed region (~2.0% expected) : 2 (13.3%)  
 Number of residues in outlier region : 0 (0.0%)

RAMPAGE by Paul de Bakker and Simon Lovell available at <http://www-cryst.bioc.cam.ac.uk/rampage/>

Please cite: S.C. Lovell, I.W. Davis, W.B. Arendall III, P.I.W. de Bakker, J.M. Word, M.G. Prisant, J.S. Richardson & D.C. Richardson (2002) Structure validation by C $\alpha$  geometry:  $\phi/\psi$  and C $\beta$  deviation. *Proteins: Structure, Function & Genetics*. **50**: 437-450

# Tem\_lta

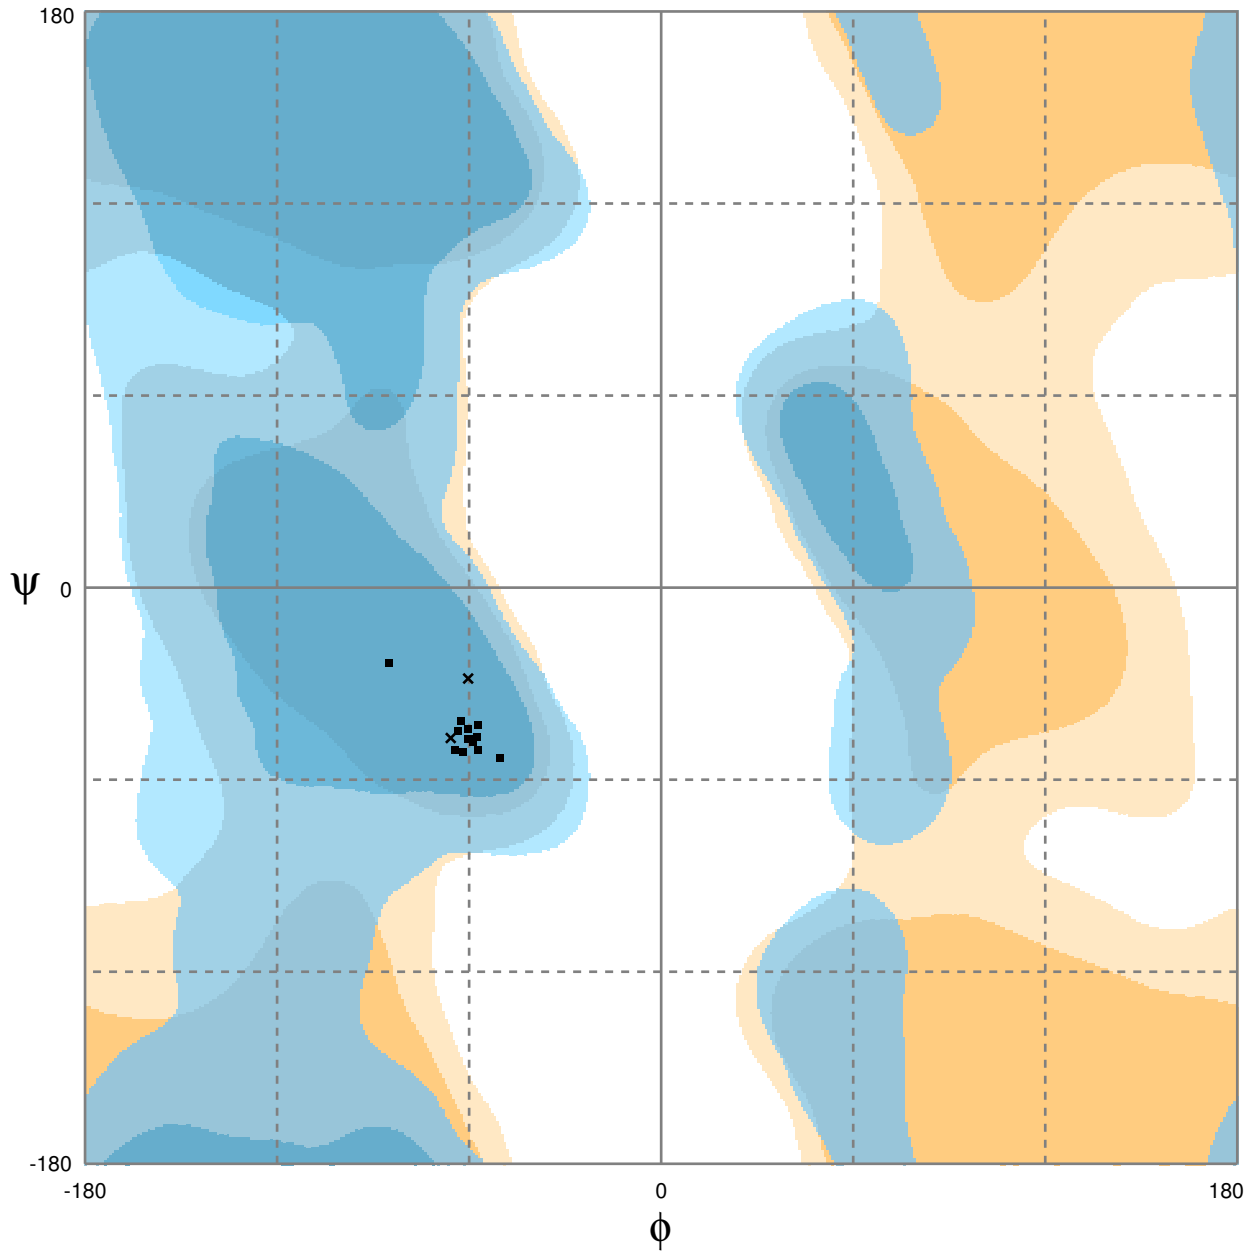

Number of residues in favoured region (~98.0% expected) : 15 (100.0%)  
Number of residues in allowed region (~2.0% expected) : 0 (0.0%)  
Number of residues in outlier region : 0 (0.0%)

RAMPAGE by Paul de Bakker and Simon Lovell available at <http://www-cryst.bioc.cam.ac.uk/rampage/>

Please cite: S.C. Lovell, I.W. Davis, W.B. Arendall III, P.I.W. de Bakker, J.M. Word, M.G. Prisant, J.S. Richardson & D.C. Richardson (2002) Structure validation by  $C\alpha$  geometry:  $\phi/\psi$  and  $C\beta$  deviation. *Proteins: Structure, Function & Genetics*. **50**: 437-450

# Tem\_ltb

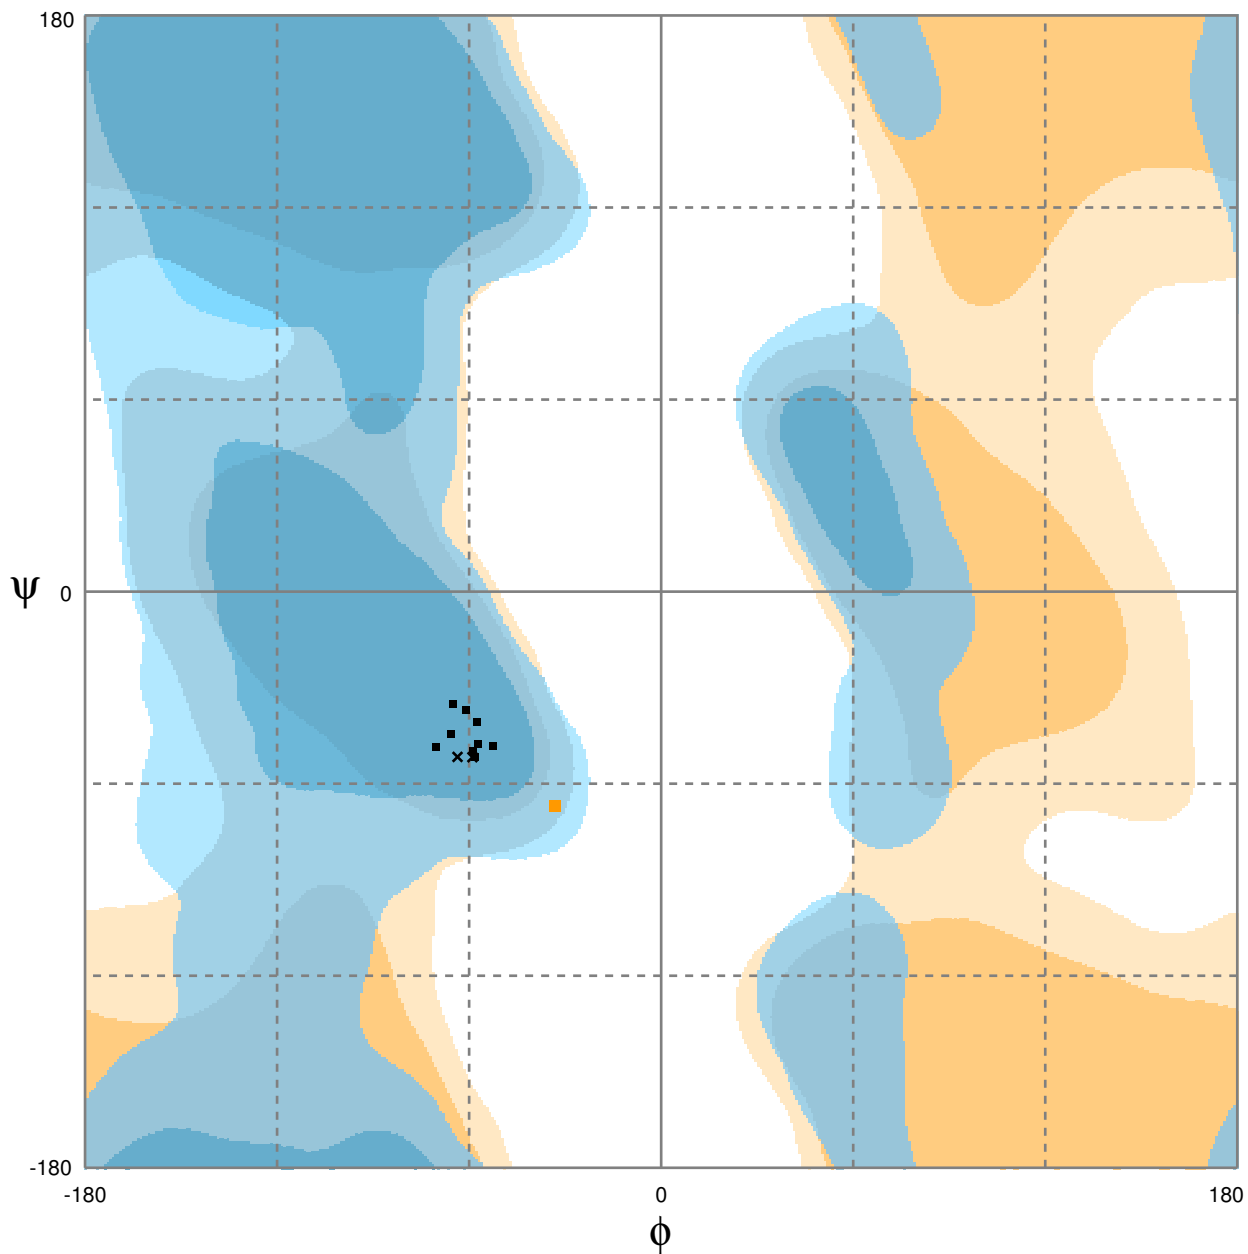

Number of residues in favoured region (~98.0% expected) : 11 (91.7%)  
Number of residues in allowed region (~2.0% expected) : 1 (8.3%)  
Number of residues in outlier region : 0 (0.0%)

RAMPAGE by Paul de Bakker and Simon Lovell available at <http://www-cryst.bioc.cam.ac.uk/rampage/>

Please cite: S.C. Lovell, I.W. Davis, W.B. Arendall III, P.I.W. de Bakker, J.M. Word, M.G. Prisant, J.S. Richardson & D.C. Richardson (2002) Structure validation by  $C\alpha$  geometry:  $\phi/\psi$  and  $C\beta$  deviation. *Proteins: Structure, Function & Genetics*. **50**: 437-450



# Tem\_ltc

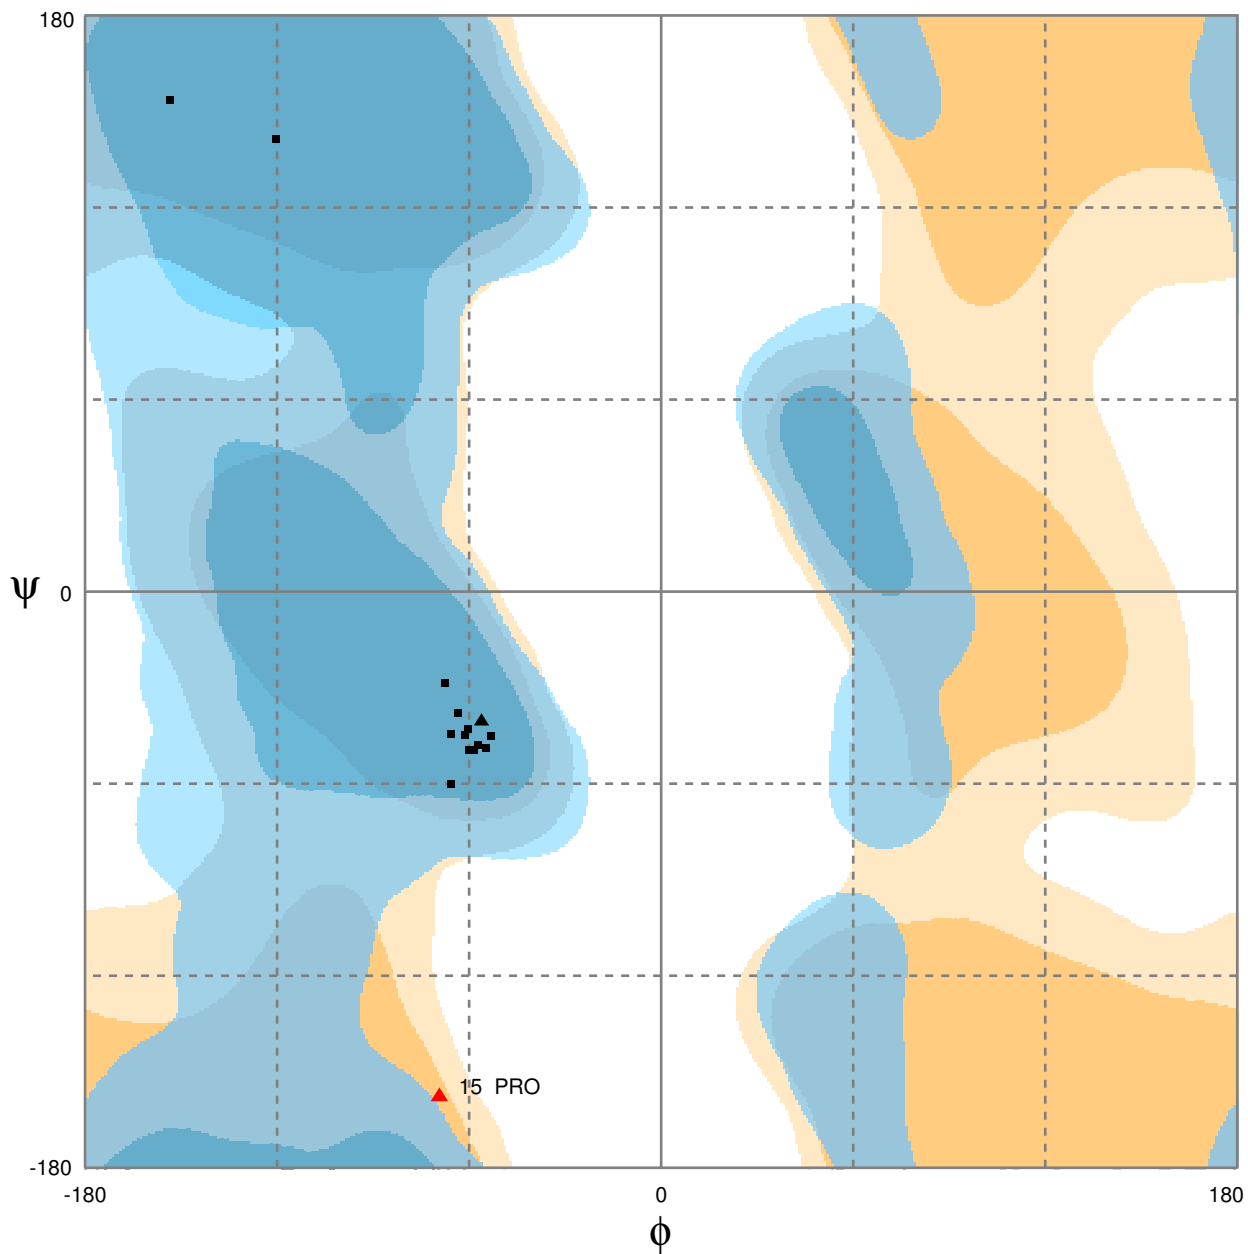

|                                                         |              |
|---------------------------------------------------------|--------------|
| Number of residues in favoured region (~98.0% expected) | : 14 (93.3%) |
| Number of residues in allowed region (~2.0% expected)   | : 0 (0.0%)   |
| Number of residues in outlier region                    | : 1 (6.7%)   |

RAMPAGE by Paul de Bakker and Simon Lovell available at <http://www-cryst.bioc.cam.ac.uk/rampage/>

Please cite: S.C. Lovell, I.W. Davis, W.B. Arendall III, P.I.W. de Bakker, J.M. Word, M.G. Prisant, J.S. Richardson & D.C. Richardson (2002) Structure validation by  $C\alpha$  geometry:  $\phi/\psi$  and  $C\beta$  deviation. *Proteins: Structure, Function & Genetics*. **50**: 437-450

# Tem\_lte

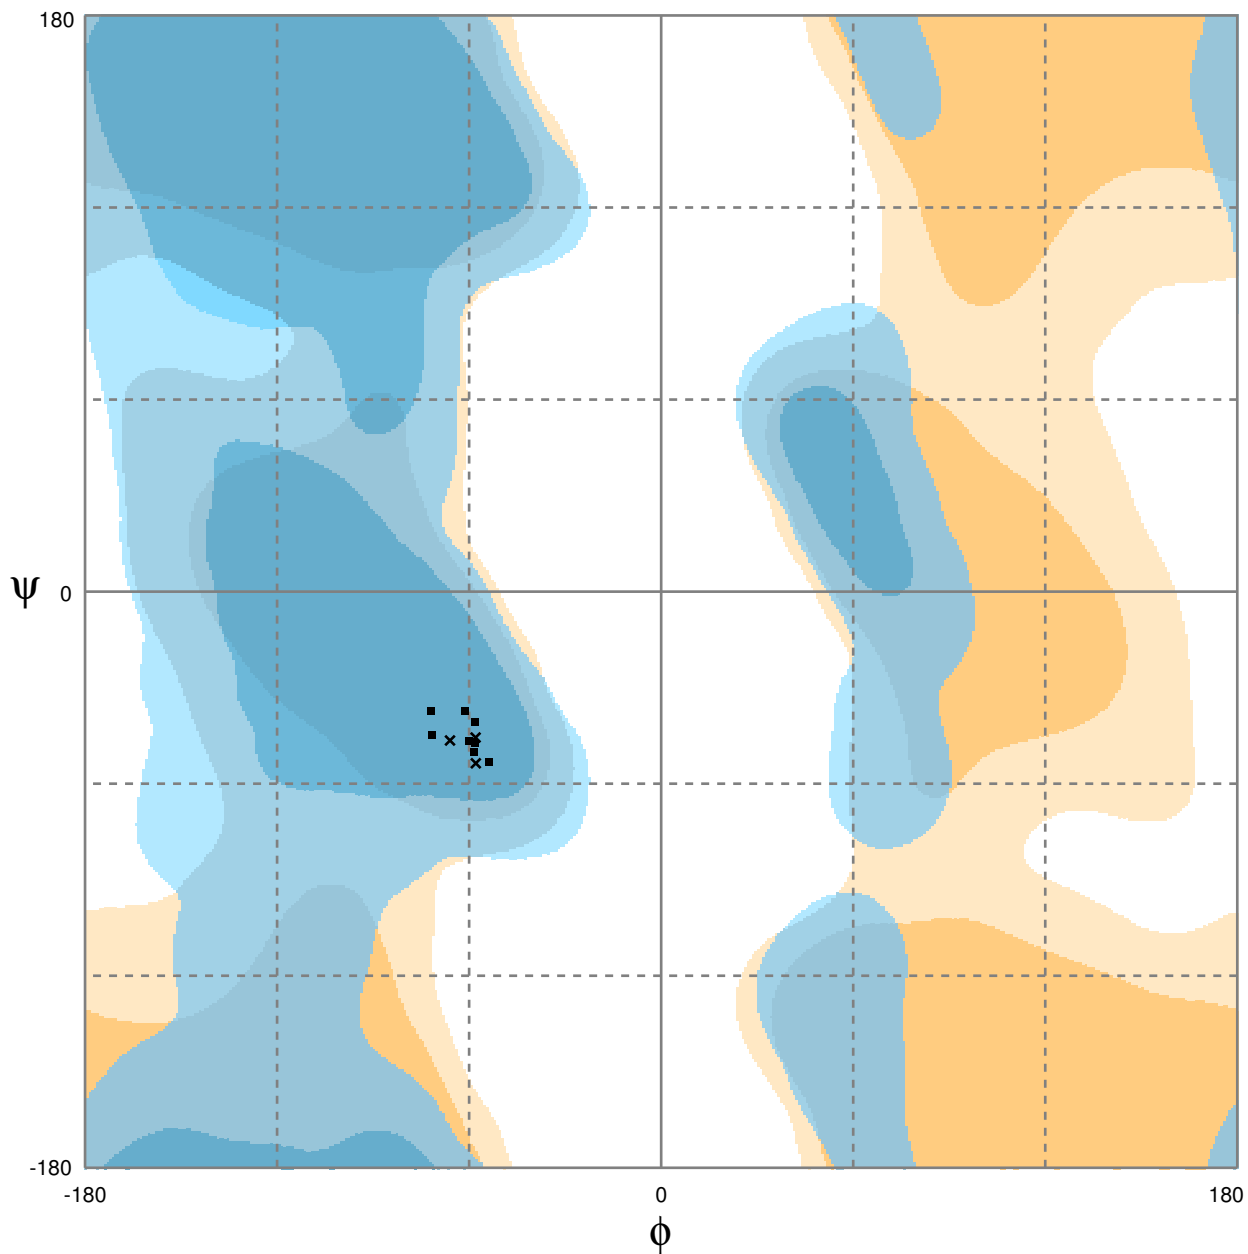

|                                                         |               |
|---------------------------------------------------------|---------------|
| Number of residues in favoured region (~98.0% expected) | : 11 (100.0%) |
| Number of residues in allowed region (~2.0% expected)   | : 0 (0.0%)    |
| Number of residues in outlier region                    | : 0 (0.0%)    |

RAMPAGE by Paul de Bakker and Simon Lovell available at <http://www-cryst.bioc.cam.ac.uk/rampage/>

Please cite: S.C. Lovell, I.W. Davis, W.B. Arendall III, P.I.W. de Bakker, J.M. Word, M.G. Prisant, J.S. Richardson & D.C. Richardson (2002) Structure validation by C $\alpha$  geometry:  $\phi/\psi$  and C $\beta$  deviation. *Proteins: Structure, Function & Genetics*. **50**: 437-450

# Tem\_ms1

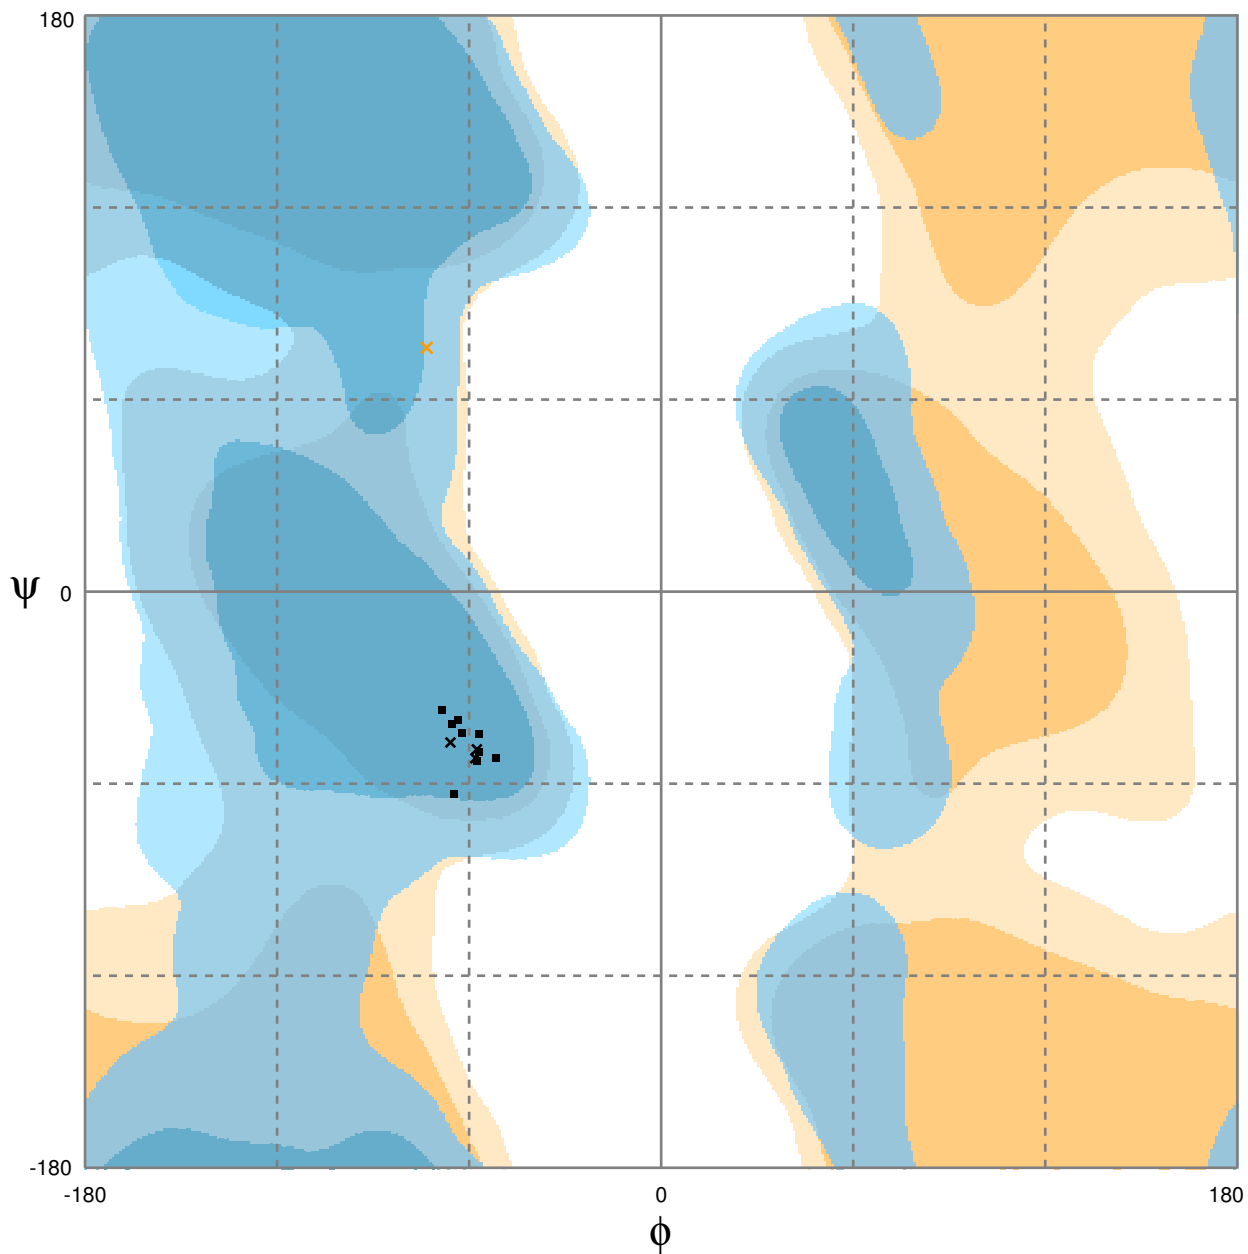

Number of residues in favoured region (~98.0% expected) : 12 (92.3%)  
Number of residues in allowed region (~2.0% expected) : 1 (7.7%)  
Number of residues in outlier region : 0 (0.0%)

RAMPAGE by Paul de Bakker and Simon Lovell available at <http://www-cryst.bioc.cam.ac.uk/rampage/>

Please cite: S.C. Lovell, I.W. Davis, W.B. Arendall III, P.I.W. de Bakker, J.M. Word, M.G. Prisant, J.S. Richardson & D.C. Richardson (2002) Structure validation by  $C\alpha$  geometry:  $\phi/\psi$  and  $C\beta$  deviation. *Proteins: Structure, Function & Genetics*. **50**: 437-450

# Tem\_ms4

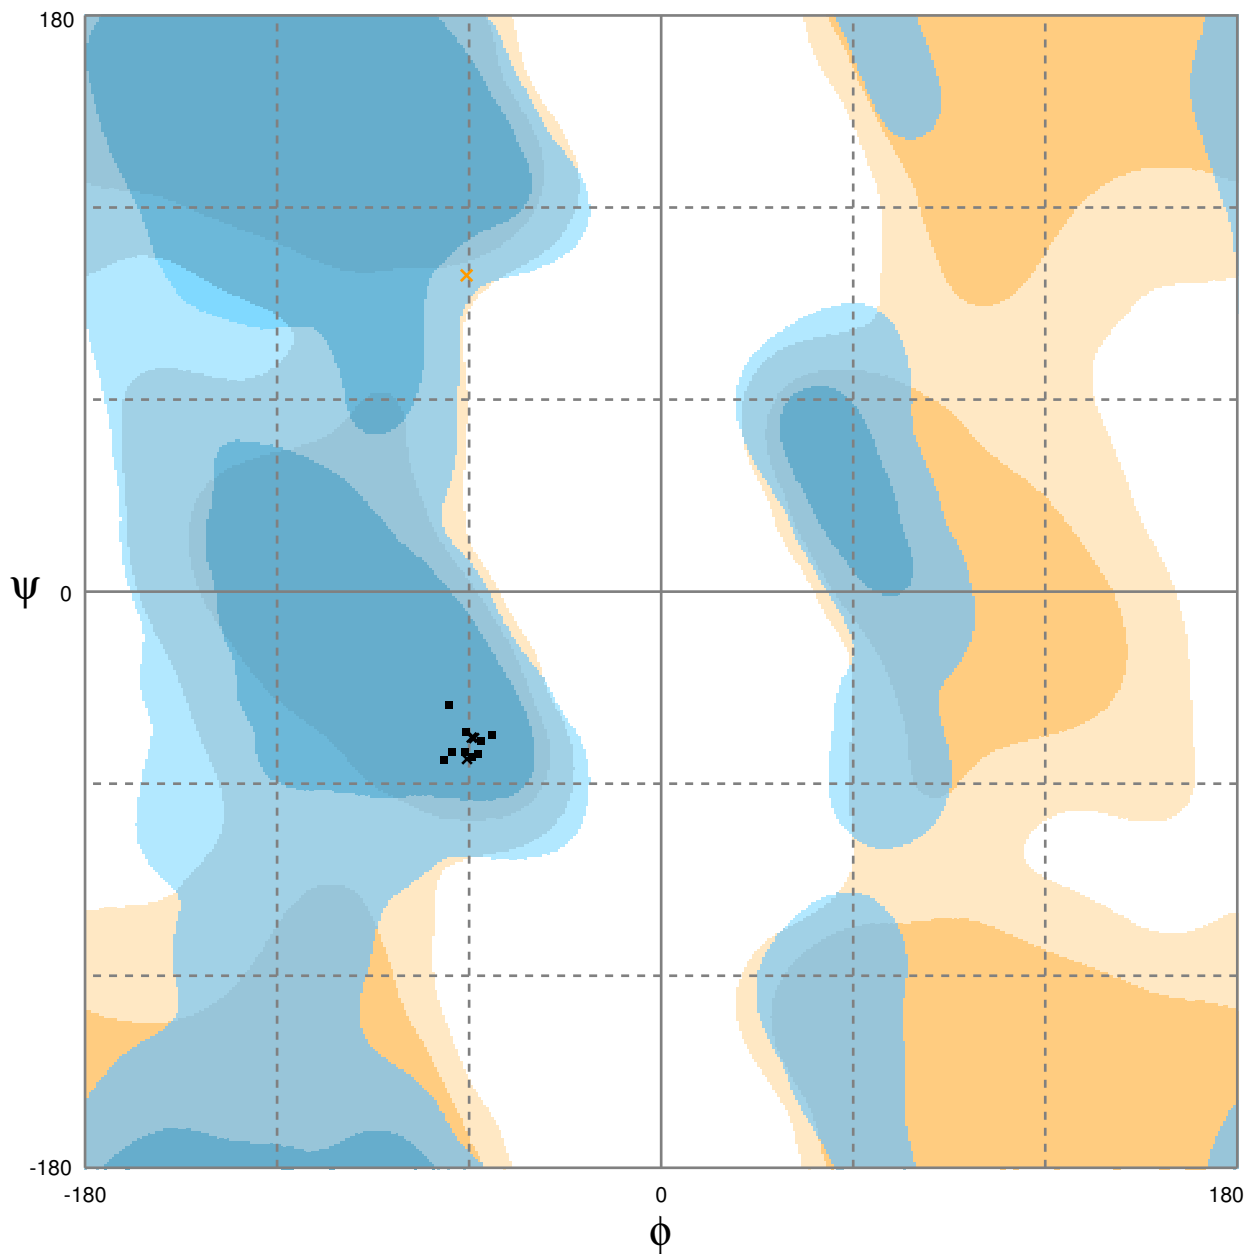

Number of residues in favoured region (~98.0% expected) : 12 (92.3%)  
Number of residues in allowed region (~2.0% expected) : 1 (7.7%)  
Number of residues in outlier region : 0 (0.0%)

RAMPAGE by Paul de Bakker and Simon Lovell available at <http://www-cryst.bioc.cam.ac.uk/rampage/>

Please cite: S.C. Lovell, I.W. Davis, W.B. Arendall III, P.I.W. de Bakker, J.M. Word, M.G. Prisant, J.S. Richardson & D.C. Richardson (2002) Structure validation by  $C\alpha$  geometry:  $\phi/\psi$  and  $C\beta$  deviation. *Proteins: Structure, Function & Genetics*. **50**: 437-450

# Tem\_pra

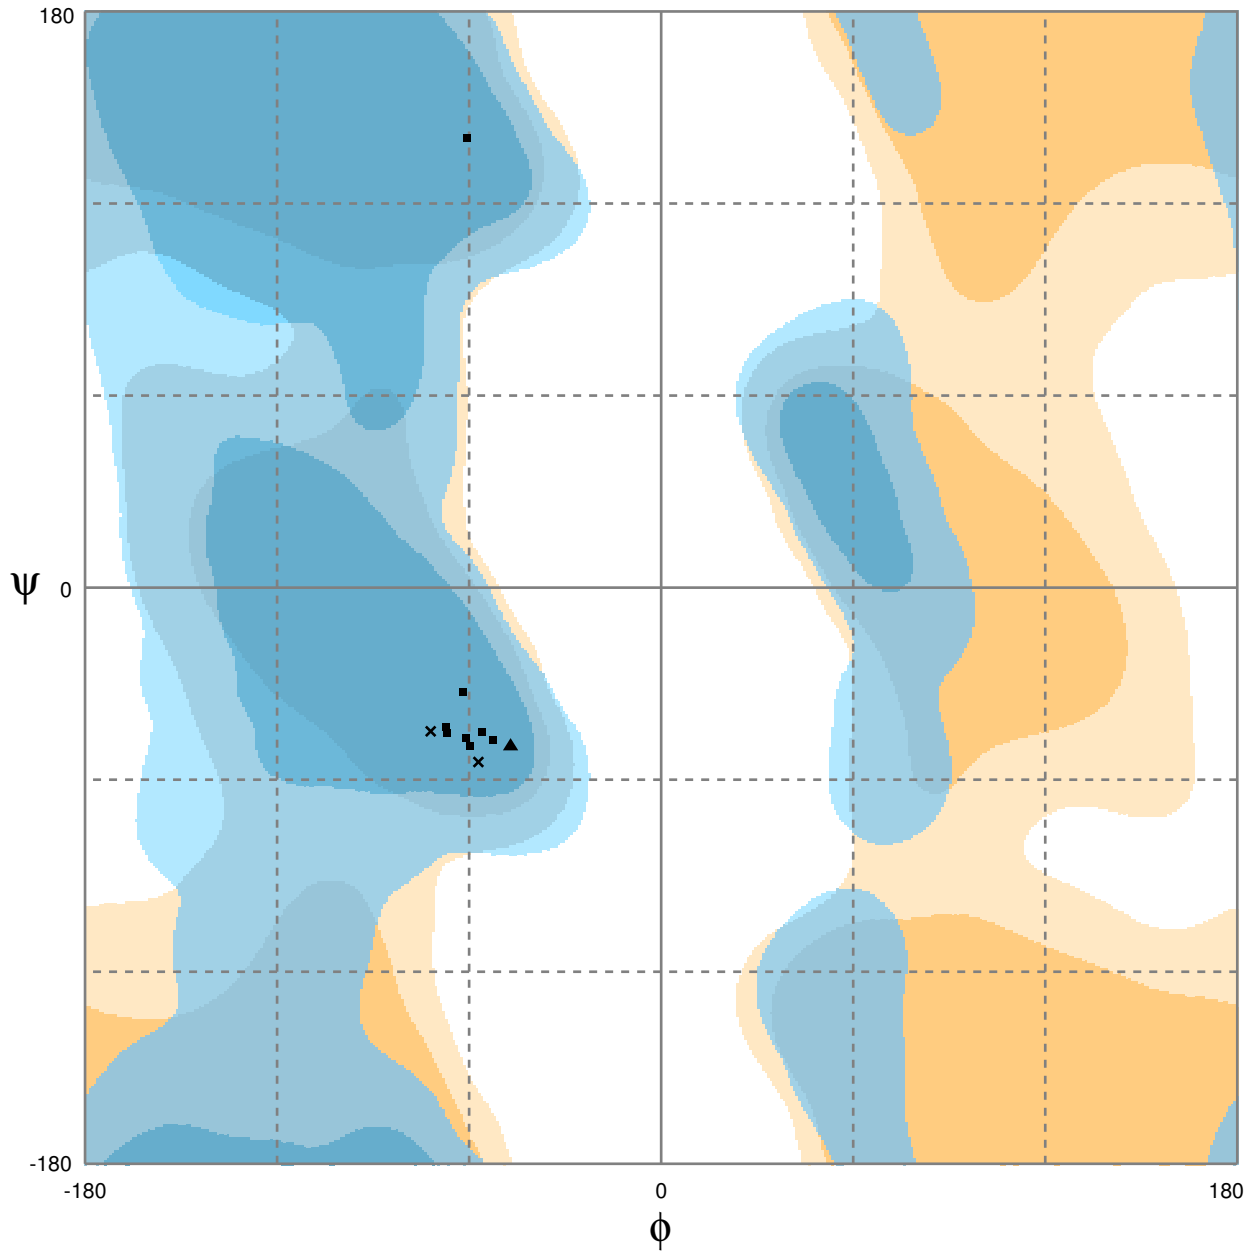

|                                                         |               |
|---------------------------------------------------------|---------------|
| Number of residues in favoured region (~98.0% expected) | : 11 (100.0%) |
| Number of residues in allowed region (~2.0% expected)   | : 0 (0.0%)    |
| Number of residues in outlier region                    | : 0 (0.0%)    |

RAMPAGE by Paul de Bakker and Simon Lovell available at <http://www-cryst.bioc.cam.ac.uk/rampage/>

Please cite: S.C. Lovell, I.W. Davis, W.B. Arendall III, P.I.W. de Bakker, J.M. Word, M.G. Prisant, J.S. Richardson & D.C. Richardson (2002) Structure validation by  $C\alpha$  geometry:  $\phi/\psi$  and  $C\beta$  deviation. *Proteins: Structure, Function & Genetics*. **50**: 437-450

# Tem\_prb

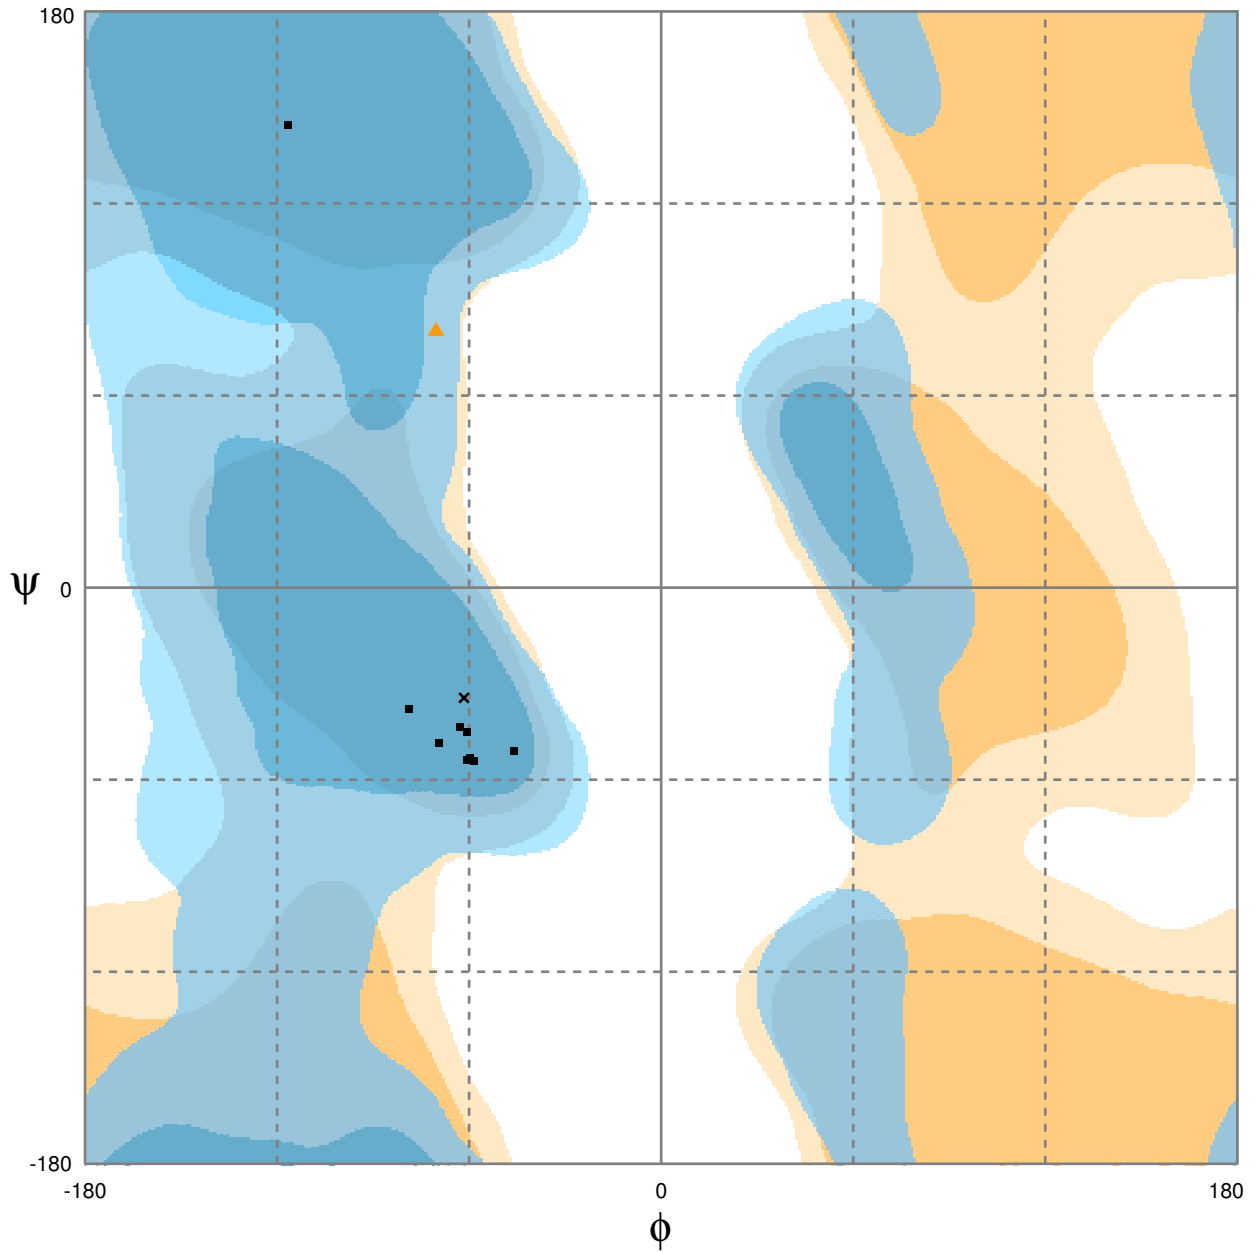

|                                                         |              |
|---------------------------------------------------------|--------------|
| Number of residues in favoured region (~98.0% expected) | : 10 (90.9%) |
| Number of residues in allowed region (~2.0% expected)   | : 1 (9.1%)   |
| Number of residues in outlier region                    | : 0 (0.0%)   |

RAMPAGE by Paul de Bakker and Simon Lovell available at <http://www-cryst.bioc.cam.ac.uk/rampage/>

Please cite: S.C. Lovell, I.W. Davis, W.B. Arendall III, P.I.W. de Bakker, J.M. Word, M.G. Prisant, J.S. Richardson & D.C. Richardson (2002) Structure validation by  $C\alpha$  geometry:  $\phi/\psi$  and  $C\beta$  deviation. *Proteins: Structure, Function & Genetics*. **50**: 437-450

# Tem\_prc

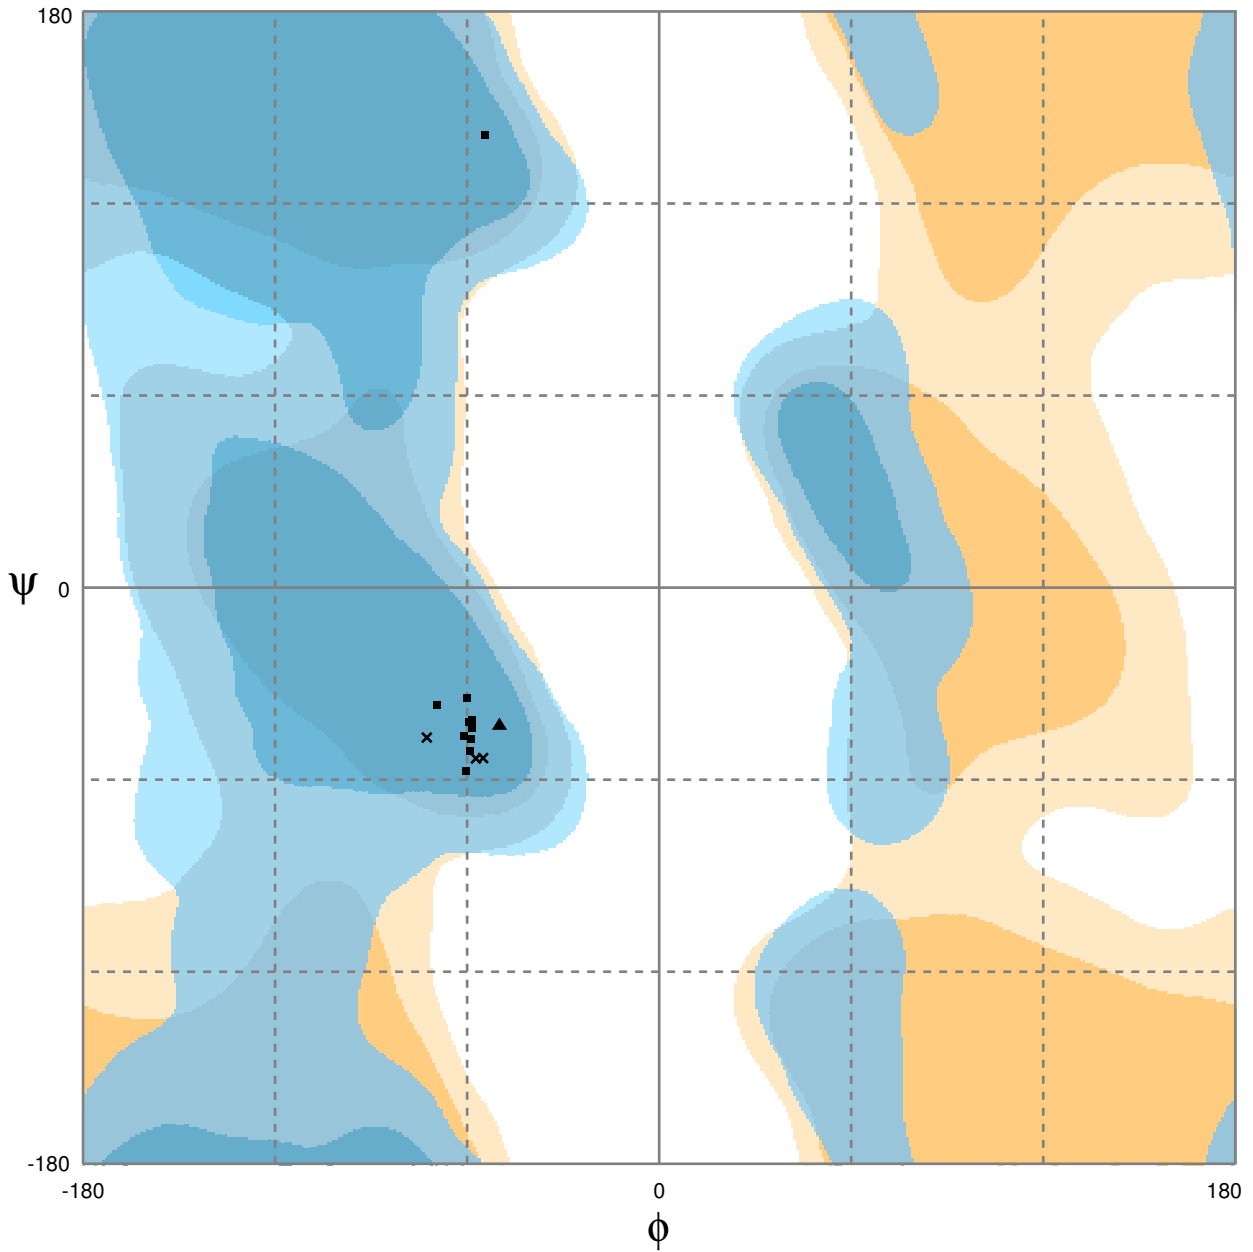

|                                                         |               |
|---------------------------------------------------------|---------------|
| Number of residues in favoured region (~98.0% expected) | : 14 (100.0%) |
| Number of residues in allowed region (~2.0% expected)   | : 0 (0.0%)    |
| Number of residues in outlier region                    | : 0 (0.0%)    |

RAMPAGE by Paul de Bakker and Simon Lovell available at <http://www-cryst.bioc.cam.ac.uk/rampage/>

Please cite: S.C. Lovell, I.W. Davis, W.B. Arendall III, P.I.W. de Bakker, J.M. Word, M.G. Prisant, J.S. Richardson & D.C. Richardson (2002) Structure validation by  $C\alpha$  geometry:  $\phi/\psi$  and  $C\beta$  deviation. *Proteins: Structure, Function & Genetics*. **50**: 437-450

# Tem\_pta

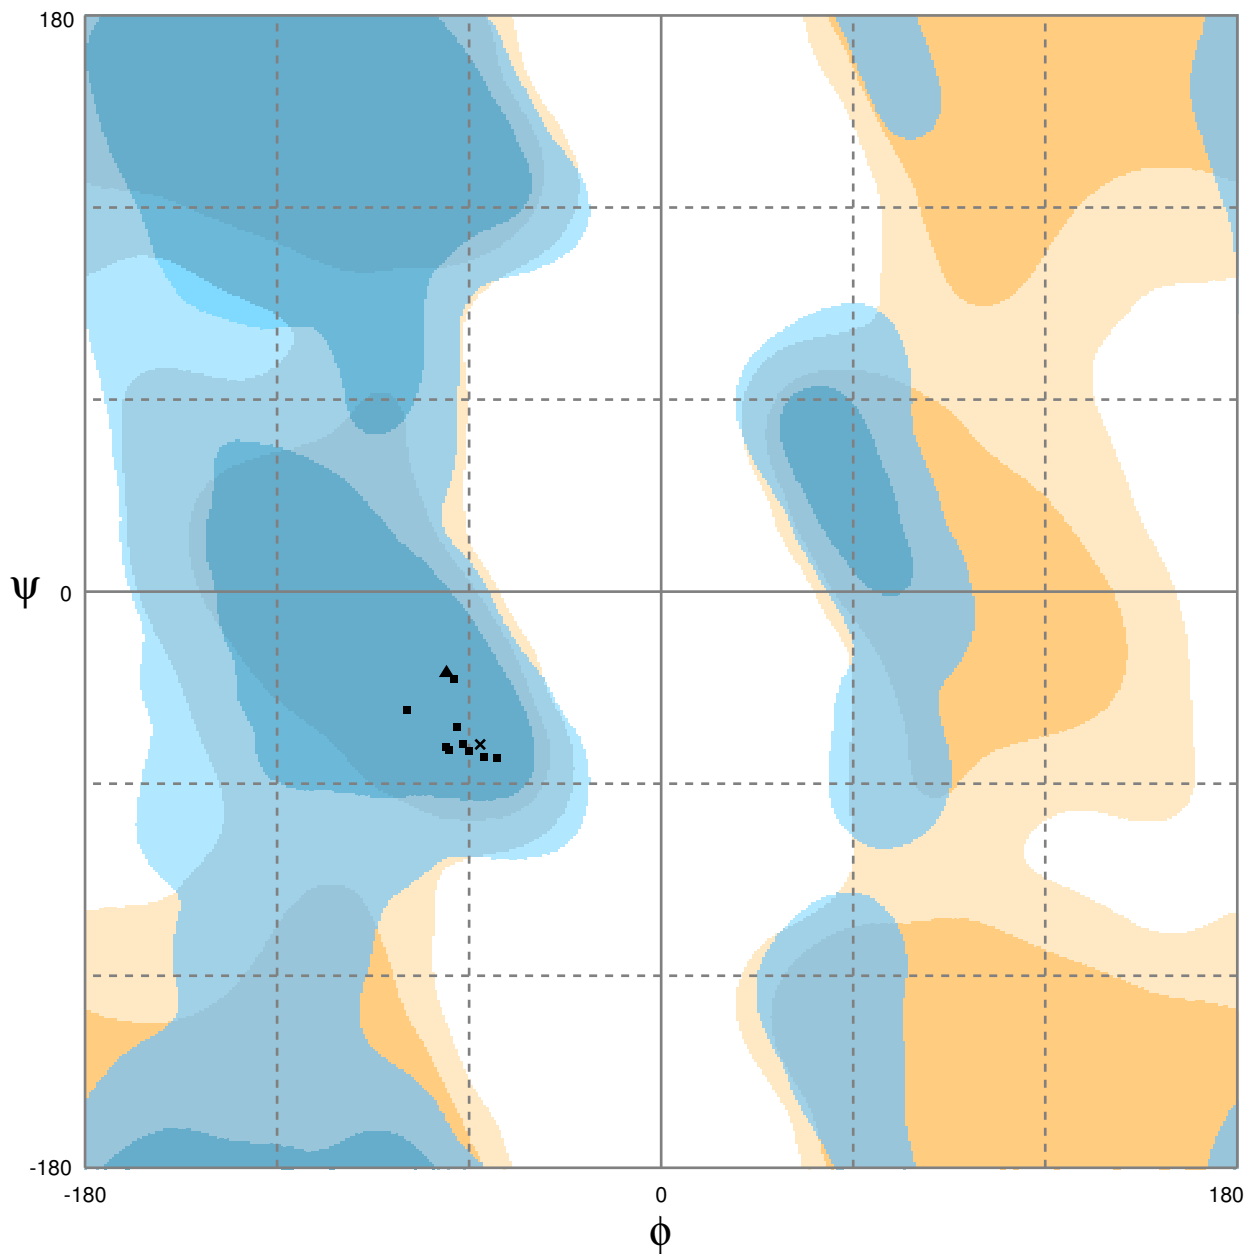

Number of residues in favoured region (~98.0% expected) : 11 (100.0%)  
Number of residues in allowed region (~2.0% expected) : 0 (0.0%)  
Number of residues in outlier region : 0 (0.0%)

RAMPAGE by Paul de Bakker and Simon Lovell available at <http://www-cryst.bioc.cam.ac.uk/rampage/>

Please cite: S.C. Lovell, I.W. Davis, W.B. Arendall III, P.I.W. de Bakker, J.M. Word, M.G. Prisant, J.S. Richardson & D.C. Richardson (2002) Structure validation by  $C\alpha$  geometry:  $\phi/\psi$  and  $C\beta$  deviation. *Proteins: Structure, Function & Genetics*. **50**: 437-450



# Tem\_ra

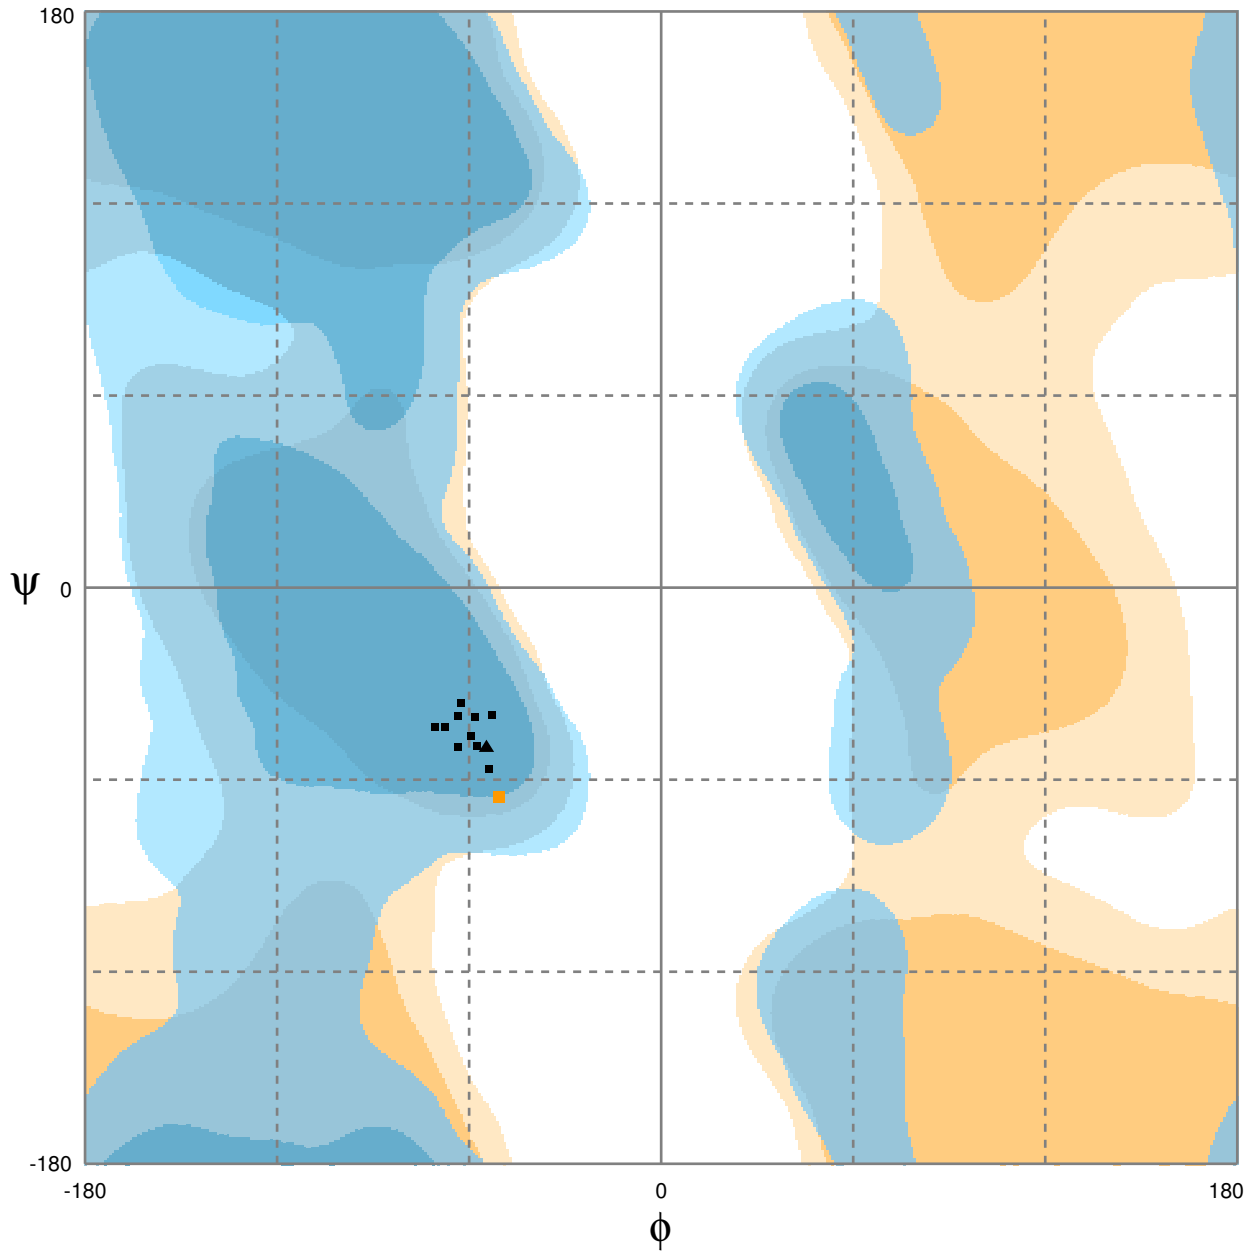

|                                                         |              |
|---------------------------------------------------------|--------------|
| Number of residues in favoured region (~98.0% expected) | : 11 (91.7%) |
| Number of residues in allowed region (~2.0% expected)   | : 1 (8.3%)   |
| Number of residues in outlier region                    | : 0 (0.0%)   |

RAMPAGE by Paul de Bakker and Simon Lovell available at <http://www-cryst.bioc.cam.ac.uk/rampage/>

Please cite: S.C. Lovell, I.W. Davis, W.B. Arendall III, P.I.W. de Bakker, J.M. Word, M.G. Prisant, J.S. Richardson & D.C. Richardson (2002) Structure validation by  $C\alpha$  geometry:  $\phi/\psi$  and  $C\beta$  deviation. *Proteins: Structure, Function & Genetics*. **50**: 437-450

# Tem\_rb

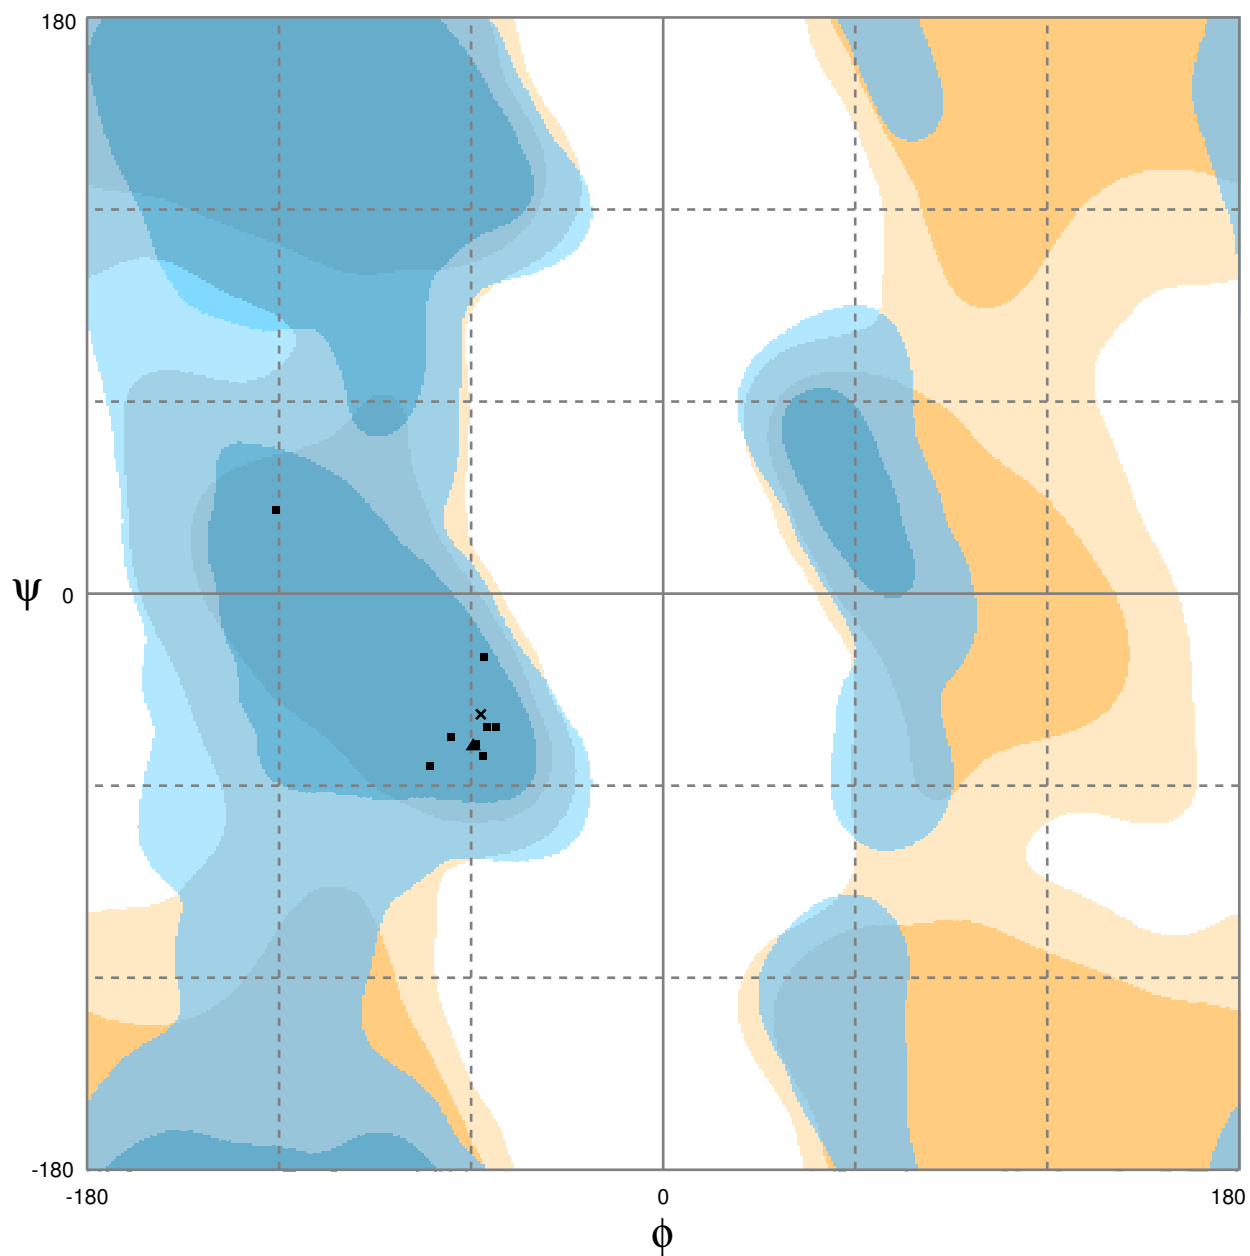

|                                                         |               |
|---------------------------------------------------------|---------------|
| Number of residues in favoured region (~98.0% expected) | : 10 (100.0%) |
| Number of residues in allowed region (~2.0% expected)   | : 0 (0.0%)    |
| Number of residues in outlier region                    | : 0 (0.0%)    |

RAMPAGE by Paul de Bakker and Simon Lovell available at <http://www-cryst.bioc.cam.ac.uk/rampage/>

Please cite: S.C. Lovell, I.W. Davis, W.B. Arendall III, P.I.W. de Bakker, J.M. Word, M.G. Prisant, J.S. Richardson & D.C. Richardson (2002) Structure validation by  $C\alpha$  geometry:  $\phi/\psi$  and  $C\beta$  deviation. *Proteins: Structure, Function & Genetics*. **50**: 437-450

# Tem\_rn1

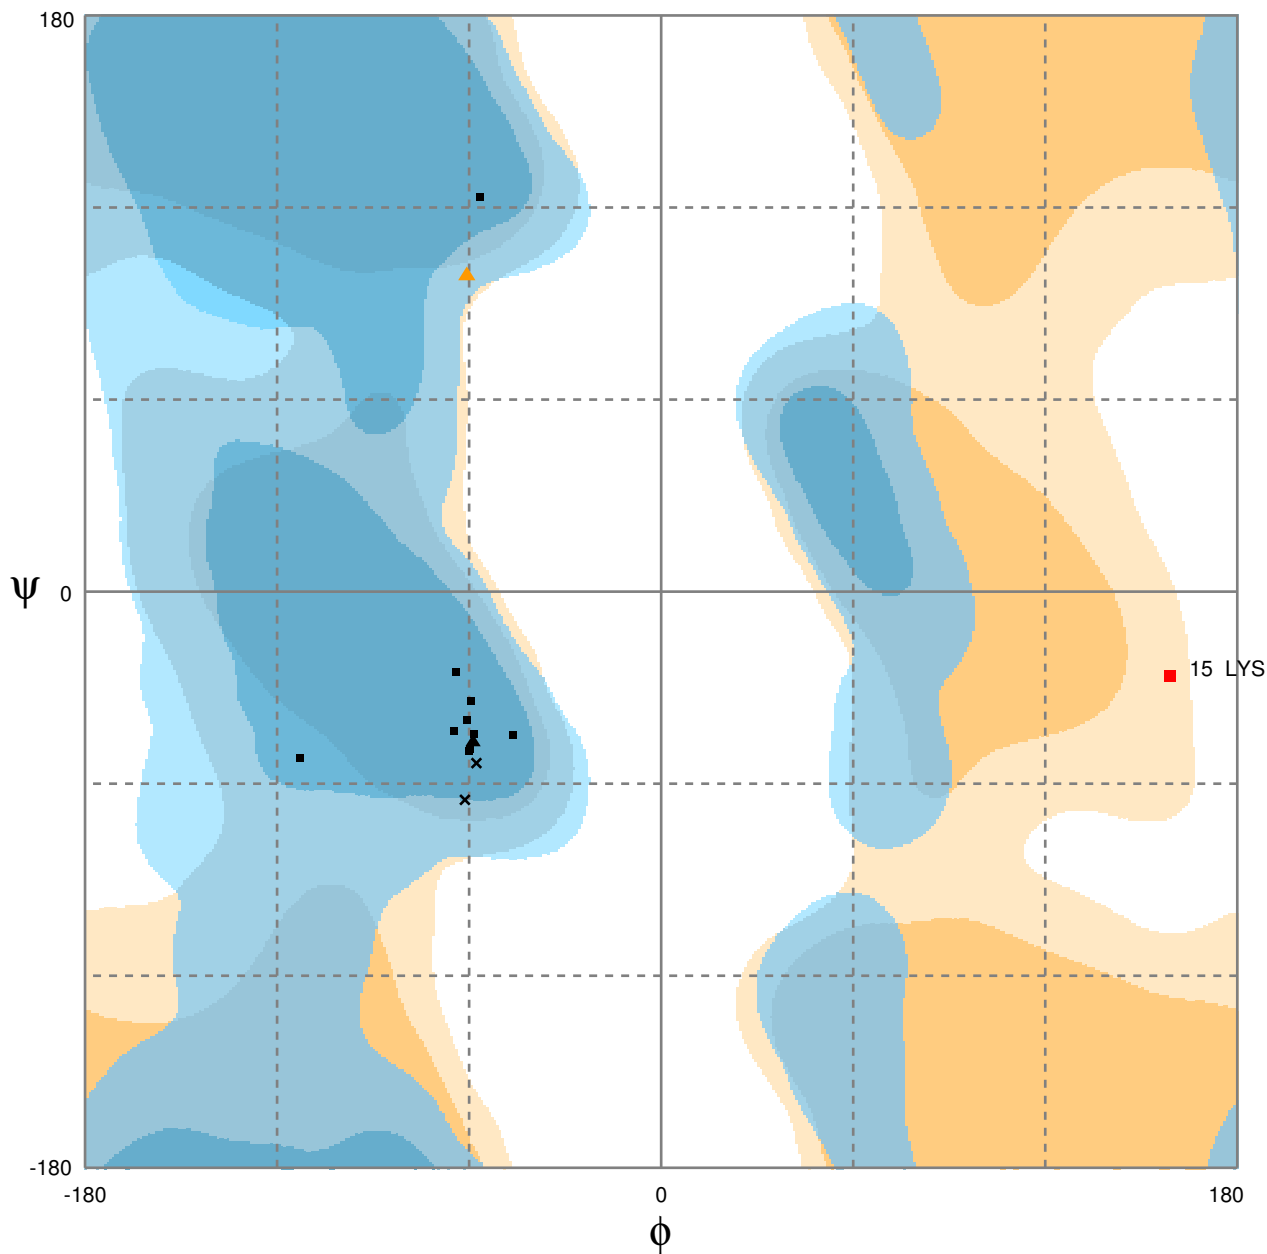

|                                                         |              |
|---------------------------------------------------------|--------------|
| Number of residues in favoured region (~98.0% expected) | : 13 (86.7%) |
| Number of residues in allowed region (~2.0% expected)   | : 1 (6.7%)   |
| Number of residues in outlier region                    | : 1 (6.7%)   |

RAMPAGE by Paul de Bakker and Simon Lovell available at <http://www-cryst.bioc.cam.ac.uk/rampage/>

Please cite: S.C. Lovell, I.W. Davis, W.B. Arendall III, P.I.W. de Bakker, J.M. Word, M.G. Prisant, J.S. Richardson & D.C. Richardson (2002) Structure validation by  $C\alpha$  geometry:  $\phi/\psi$  and  $C\beta$  deviation. *Proteins: Structure, Function & Genetics*. **50**: 437-450

# Tem\_rn3

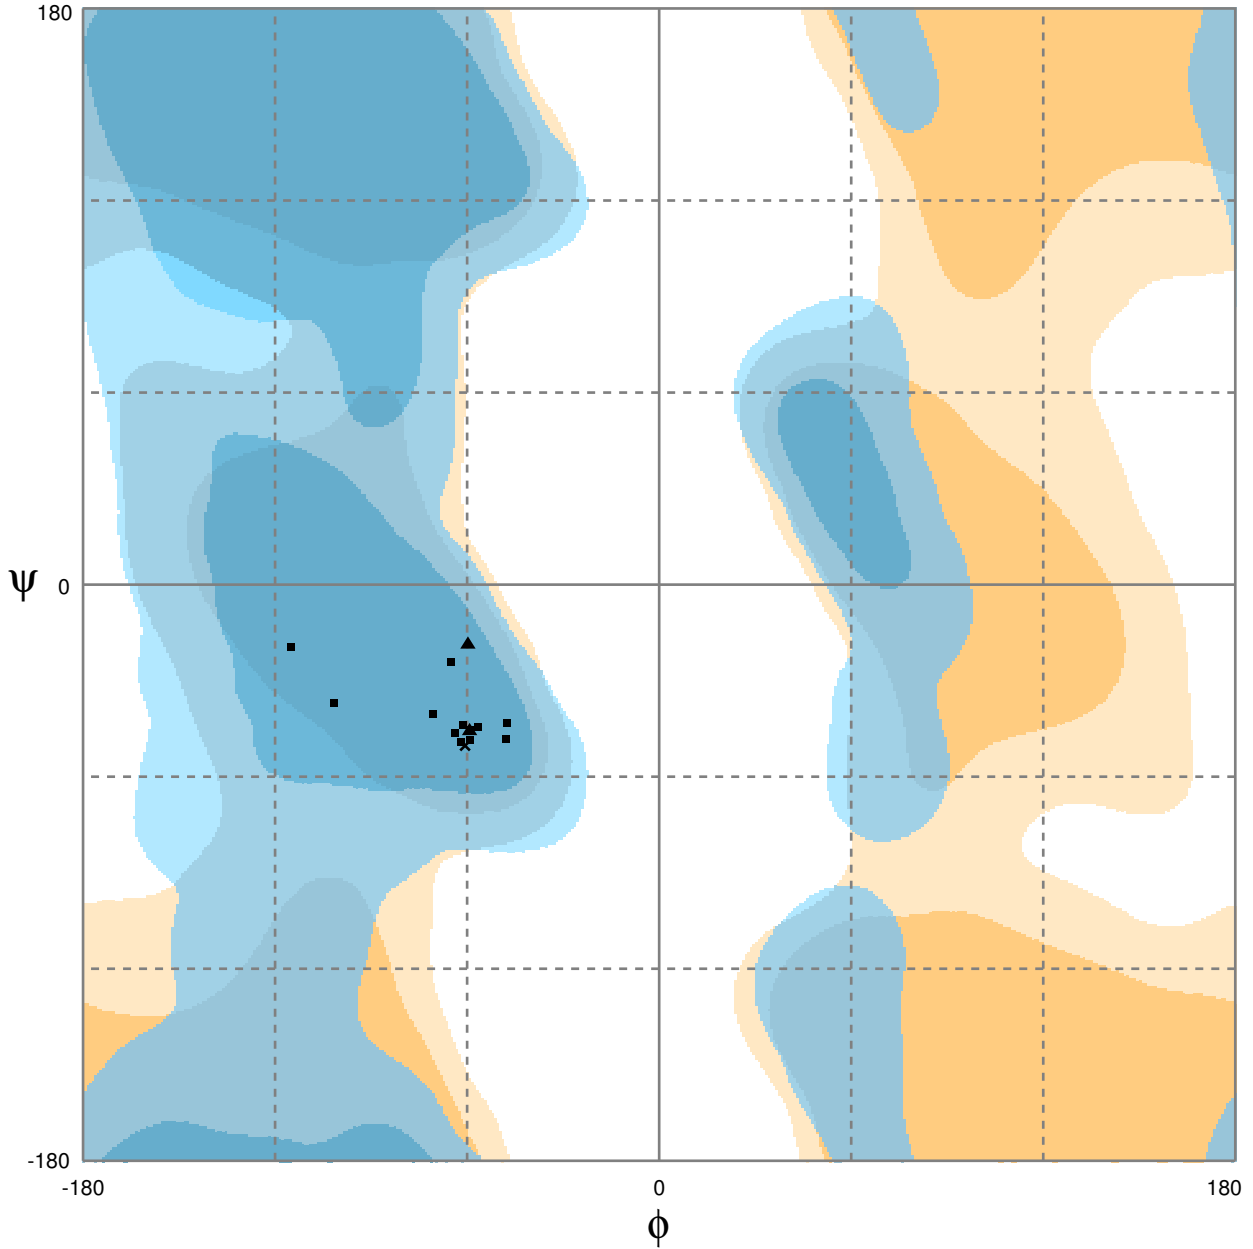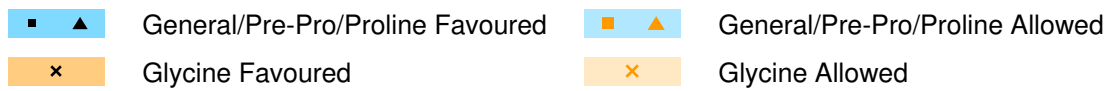

|                                                         |               |
|---------------------------------------------------------|---------------|
| Number of residues in favoured region (~98.0% expected) | : 15 (100.0%) |
| Number of residues in allowed region (~2.0% expected)   | : 0 (0.0%)    |
| Number of residues in outlier region                    | : 0 (0.0%)    |

RAMPAGE by Paul de Bakker and Simon Lovell available at <http://www-cryst.bioc.cam.ac.uk/rampage/>

Please cite: S.C. Lovell, I.W. Davis, W.B. Arendall III, P.I.W. de Bakker, J.M. Word, M.G. Prisant, J.S. Richardson & D.C. Richardson (2002) Structure validation by  $C\alpha$  geometry:  $\phi/\psi$  and  $C\beta$  deviation. *Proteins: Structure, Function & Genetics*. **50**: 437-450

# Tem\_sha

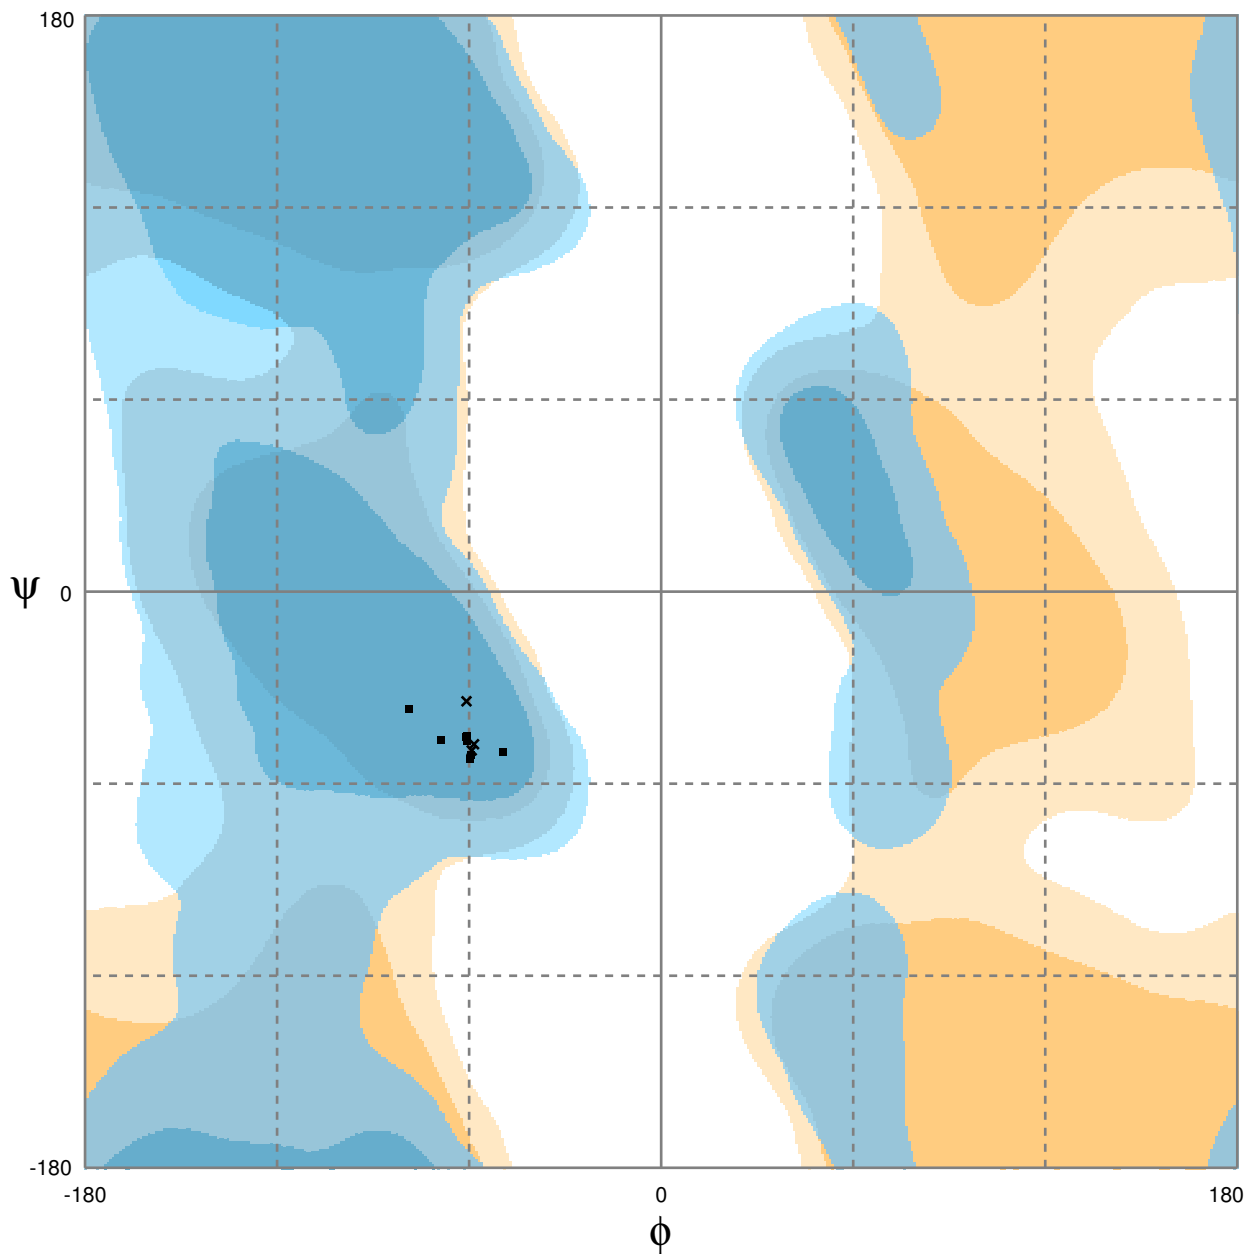

Number of residues in favoured region (~98.0% expected) : 11 (100.0%)  
Number of residues in allowed region (~2.0% expected) : 0 (0.0%)  
Number of residues in outlier region : 0 (0.0%)

RAMPAGE by Paul de Bakker and Simon Lovell available at <http://www-cryst.bioc.cam.ac.uk/rampage/>

Please cite: S.C. Lovell, I.W. Davis, W.B. Arendall III, P.I.W. de Bakker, J.M. Word, M.G. Prisant, J.S. Richardson & D.C. Richardson (2002) Structure validation by  $C\alpha$  geometry:  $\phi/\psi$  and  $C\beta$  deviation. *Proteins: Structure, Function & Genetics*. **50**: 437-450

# Tem\_shb

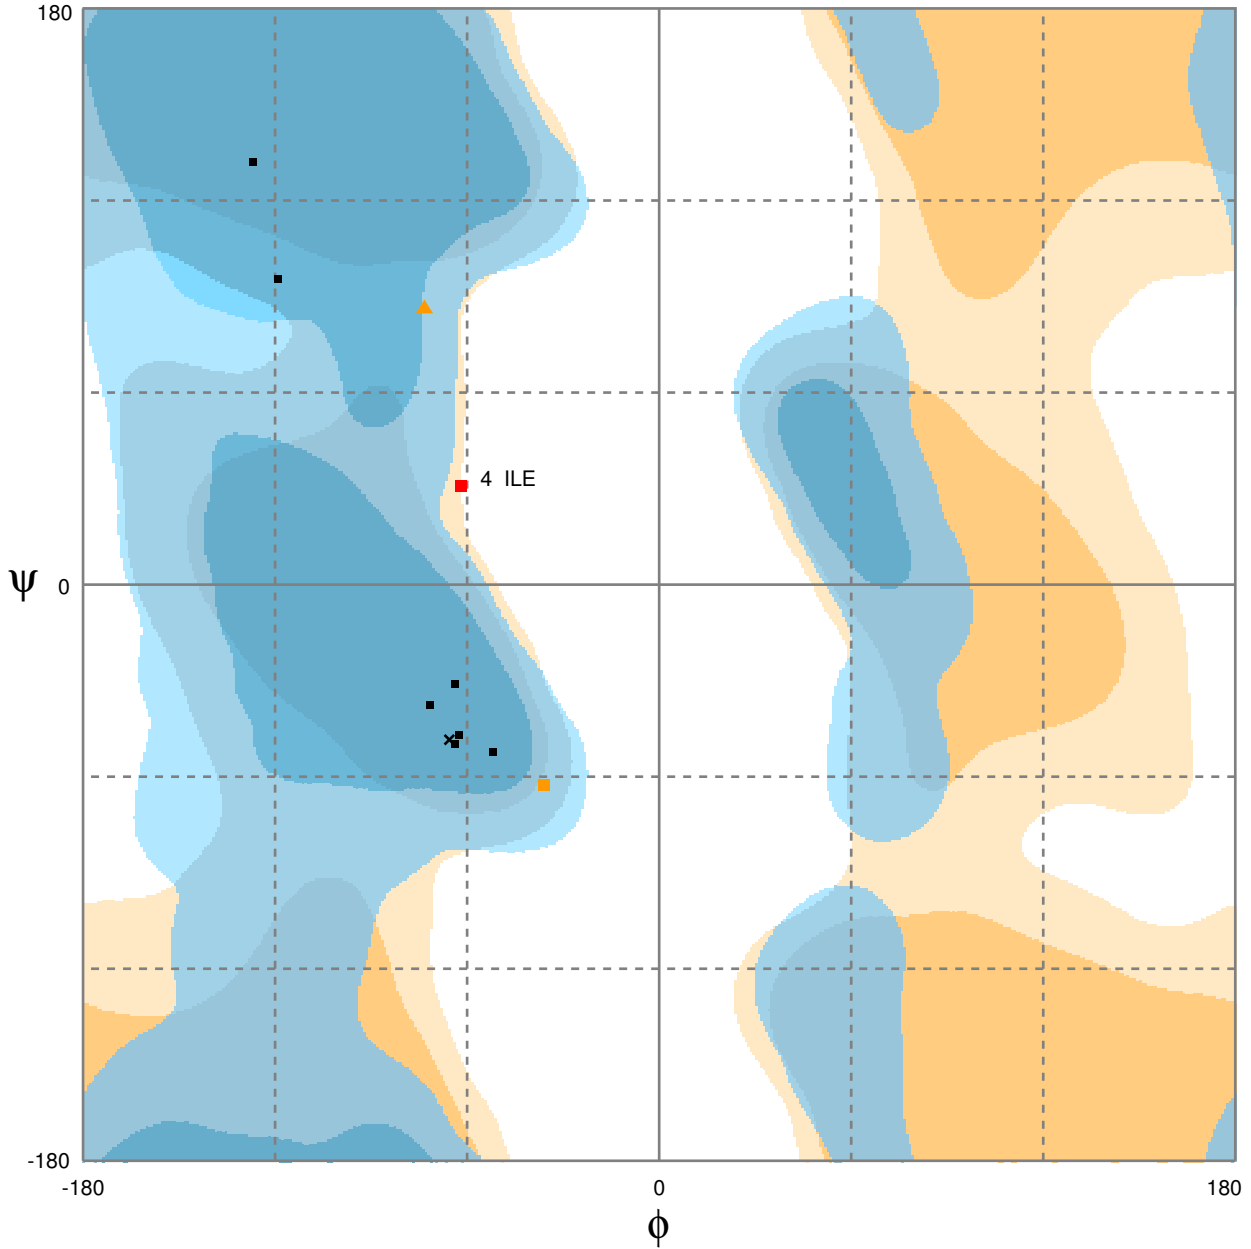

Number of residues in favoured region (~98.0% expected) : 8 (72.7%)  
 Number of residues in allowed region (~2.0% expected) : 2 (18.2%)  
 Number of residues in outlier region : 1 (9.1%)

RAMPAGE by Paul de Bakker and Simon Lovell available at <http://www-cryst.bioc.cam.ac.uk/rampage/>

Please cite: S.C. Lovell, I.W. Davis, W.B. Arendall III, P.I.W. de Bakker, J.M. Word, M.G. Prisant, J.S. Richardson & D.C. Richardson (2002) Structure validation by  $C\alpha$  geometry:  $\phi/\psi$  and  $C\beta$  deviation. *Proteins: Structure, Function & Genetics*. **50**: 437-450

# Tem\_shc

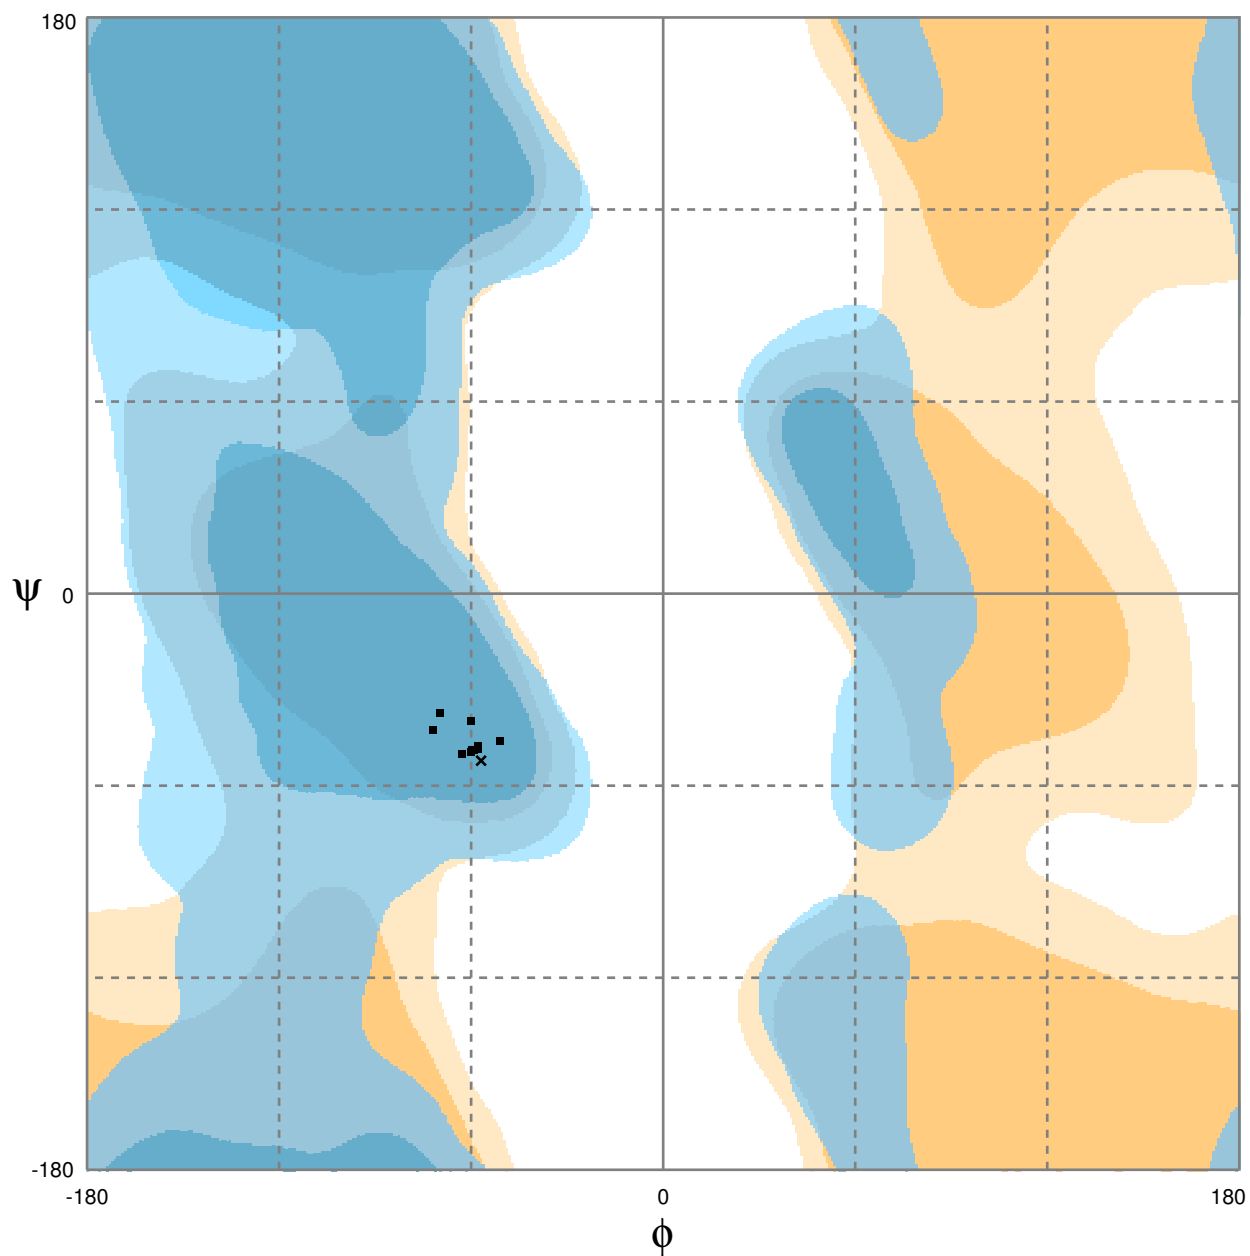

|                                                         |               |
|---------------------------------------------------------|---------------|
| Number of residues in favoured region (~98.0% expected) | : 11 (100.0%) |
| Number of residues in allowed region (~2.0% expected)   | : 0 (0.0%)    |
| Number of residues in outlier region                    | : 0 (0.0%)    |

RAMPAGE by Paul de Bakker and Simon Lovell available at <http://www-cryst.bioc.cam.ac.uk/rampage/>

Please cite: S.C. Lovell, I.W. Davis, W.B. Arendall III, P.I.W. de Bakker, J.M. Word, M.G. Prisant, J.S. Richardson & D.C. Richardson (2002) Structure validation by  $C\alpha$  geometry:  $\phi/\psi$  and  $C\beta$  deviation. *Proteins: Structure, Function & Genetics*. **50**: 437-450

# Tem\_shd

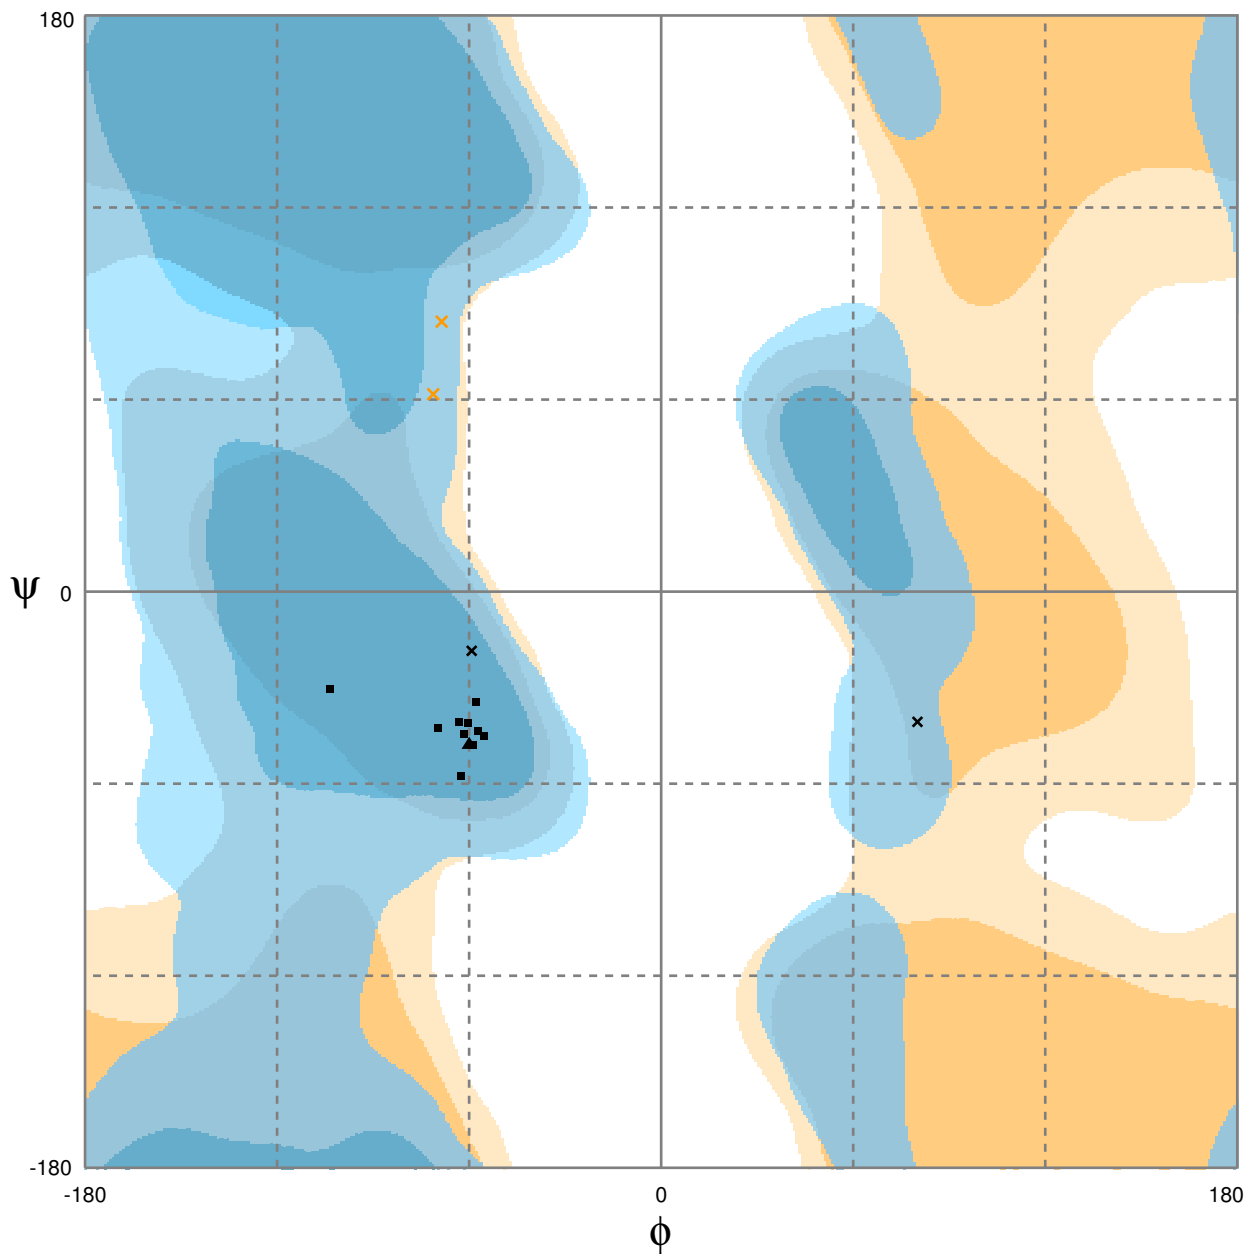

|                                                         |              |
|---------------------------------------------------------|--------------|
| Number of residues in favoured region (~98.0% expected) | : 13 (86.7%) |
| Number of residues in allowed region (~2.0% expected)   | : 2 (13.3%)  |
| Number of residues in outlier region                    | : 0 (0.0%)   |

RAMPAGE by Paul de Bakker and Simon Lovell available at <http://www-cryst.bioc.cam.ac.uk/rampage/>

Please cite: S.C. Lovell, I.W. Davis, W.B. Arendall III, P.I.W. de Bakker, J.M. Word, M.G. Prisant, J.S. Richardson & D.C. Richardson (2002) Structure validation by  $C\alpha$  geometry:  $\phi/\psi$  and  $C\beta$  deviation. *Proteins: Structure, Function & Genetics*. **50**: 437-450



# Tem\_shf

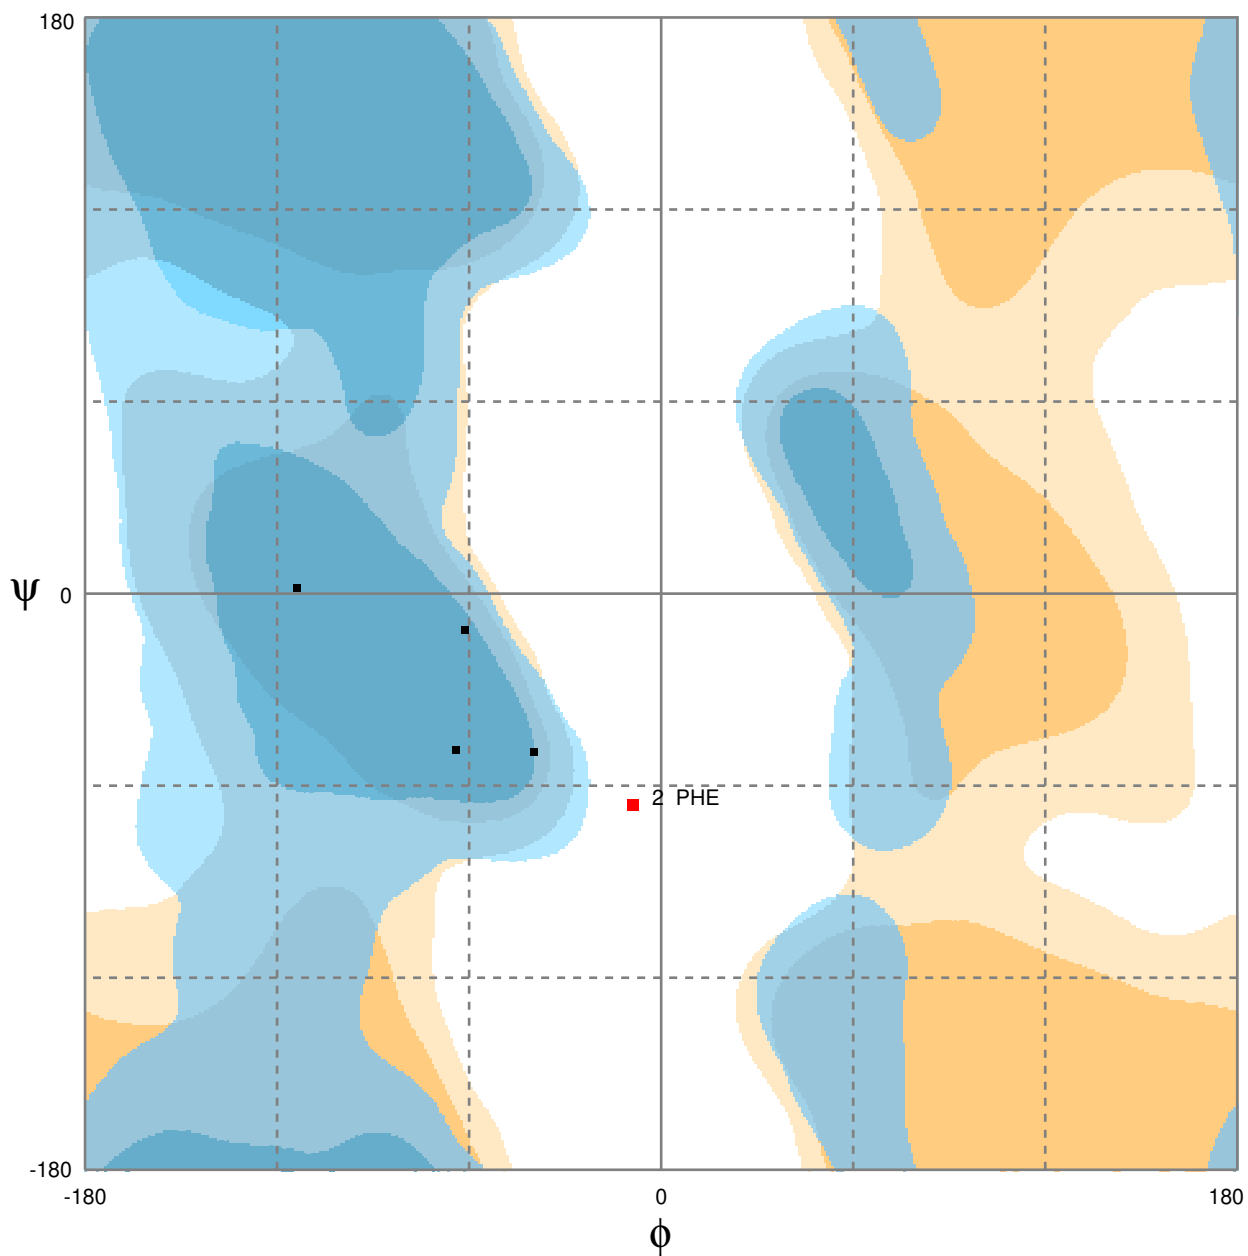

|                                                         |             |
|---------------------------------------------------------|-------------|
| Number of residues in favoured region (~98.0% expected) | : 4 (80.0%) |
| Number of residues in allowed region (~2.0% expected)   | : 0 (0.0%)  |
| Number of residues in outlier region                    | : 1 (20.0%) |

RAMPAGE by Paul de Bakker and Simon Lovell available at <http://www-cryst.bioc.cam.ac.uk/rampage/>

Please cite: S.C. Lovell, I.W. Davis, W.B. Arendall III, P.I.W. de Bakker, J.M. Word, M.G. Prisant, J.S. Richardson & D.C. Richardson (2002) Structure validation by  $C\alpha$  geometry:  $\phi/\psi$  and  $C\beta$  deviation. *Proteins: Structure, Function & Genetics*. **50**: 437-450

# Tem\_sn1

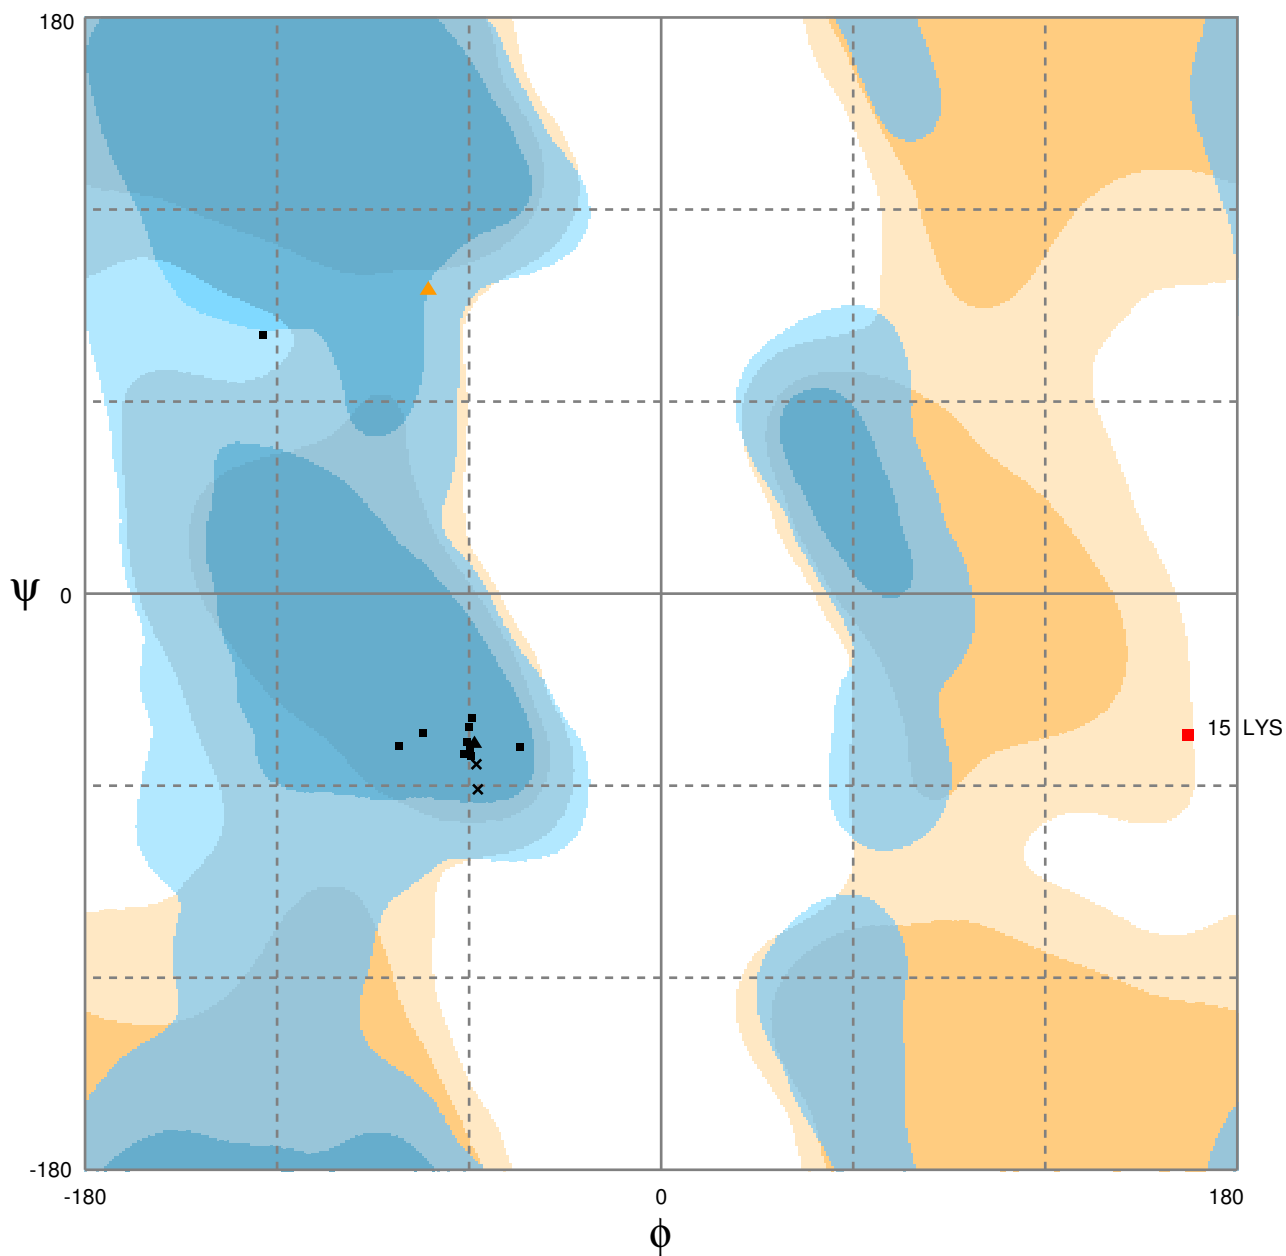

Number of residues in favoured region (~98.0% expected) : 13 (86.7%)  
 Number of residues in allowed region (~2.0% expected) : 1 (6.7%)  
 Number of residues in outlier region : 1 (6.7%)

RAMPAGE by Paul de Bakker and Simon Lovell available at <http://www-cryst.bioc.cam.ac.uk/rampage/>

Please cite: S.C. Lovell, I.W. Davis, W.B. Arendall III, P.I.W. de Bakker, J.M. Word, M.G. Prisant, J.S. Richardson & D.C. Richardson (2002) Structure validation by  $C\alpha$  geometry:  $\phi/\psi$  and  $C\beta$  deviation. *Proteins: Structure, Function & Genetics*. **50**: 437-450

# Tem\_sn2

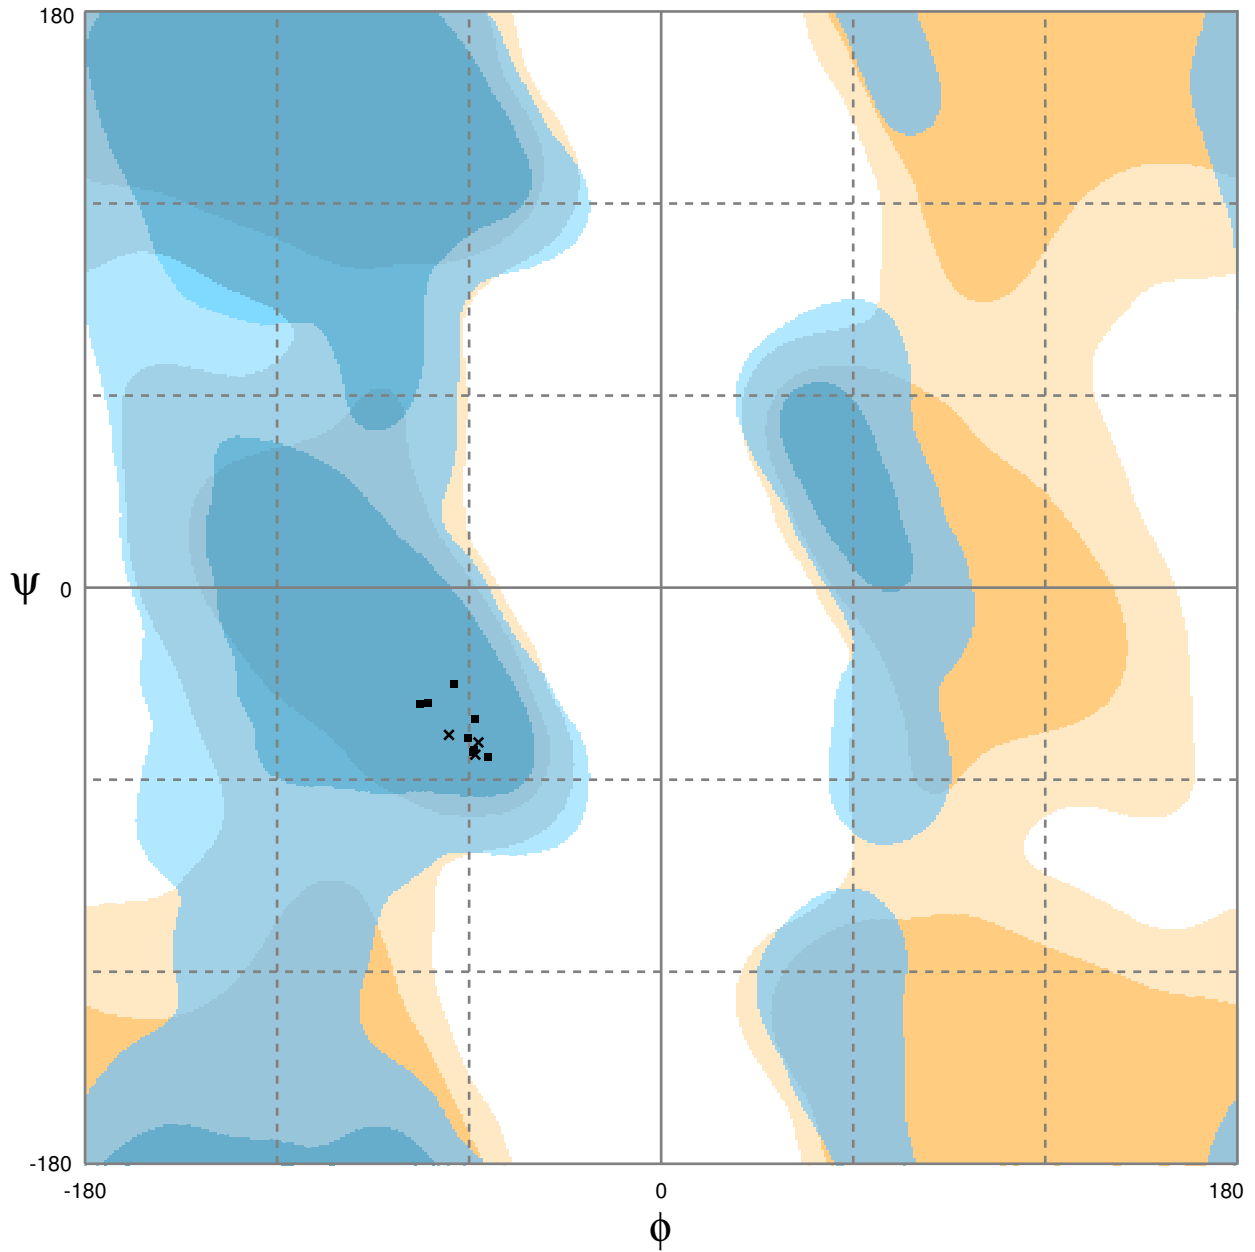

|                                                         |               |
|---------------------------------------------------------|---------------|
| Number of residues in favoured region (~98.0% expected) | : 11 (100.0%) |
| Number of residues in allowed region (~2.0% expected)   | : 0 (0.0%)    |
| Number of residues in outlier region                    | : 0 (0.0%)    |

RAMPAGE by Paul de Bakker and Simon Lovell available at <http://www-cryst.bioc.cam.ac.uk/rampage/>

Please cite: S.C. Lovell, I.W. Davis, W.B. Arendall III, P.I.W. de Bakker, J.M. Word, M.G. Prisant, J.S. Richardson & D.C. Richardson (2002) Structure validation by C $\alpha$  geometry:  $\phi/\psi$  and C $\beta$  deviation. *Proteins: Structure, Function & Genetics*. **50**: 437-450

# Tem\_sn3

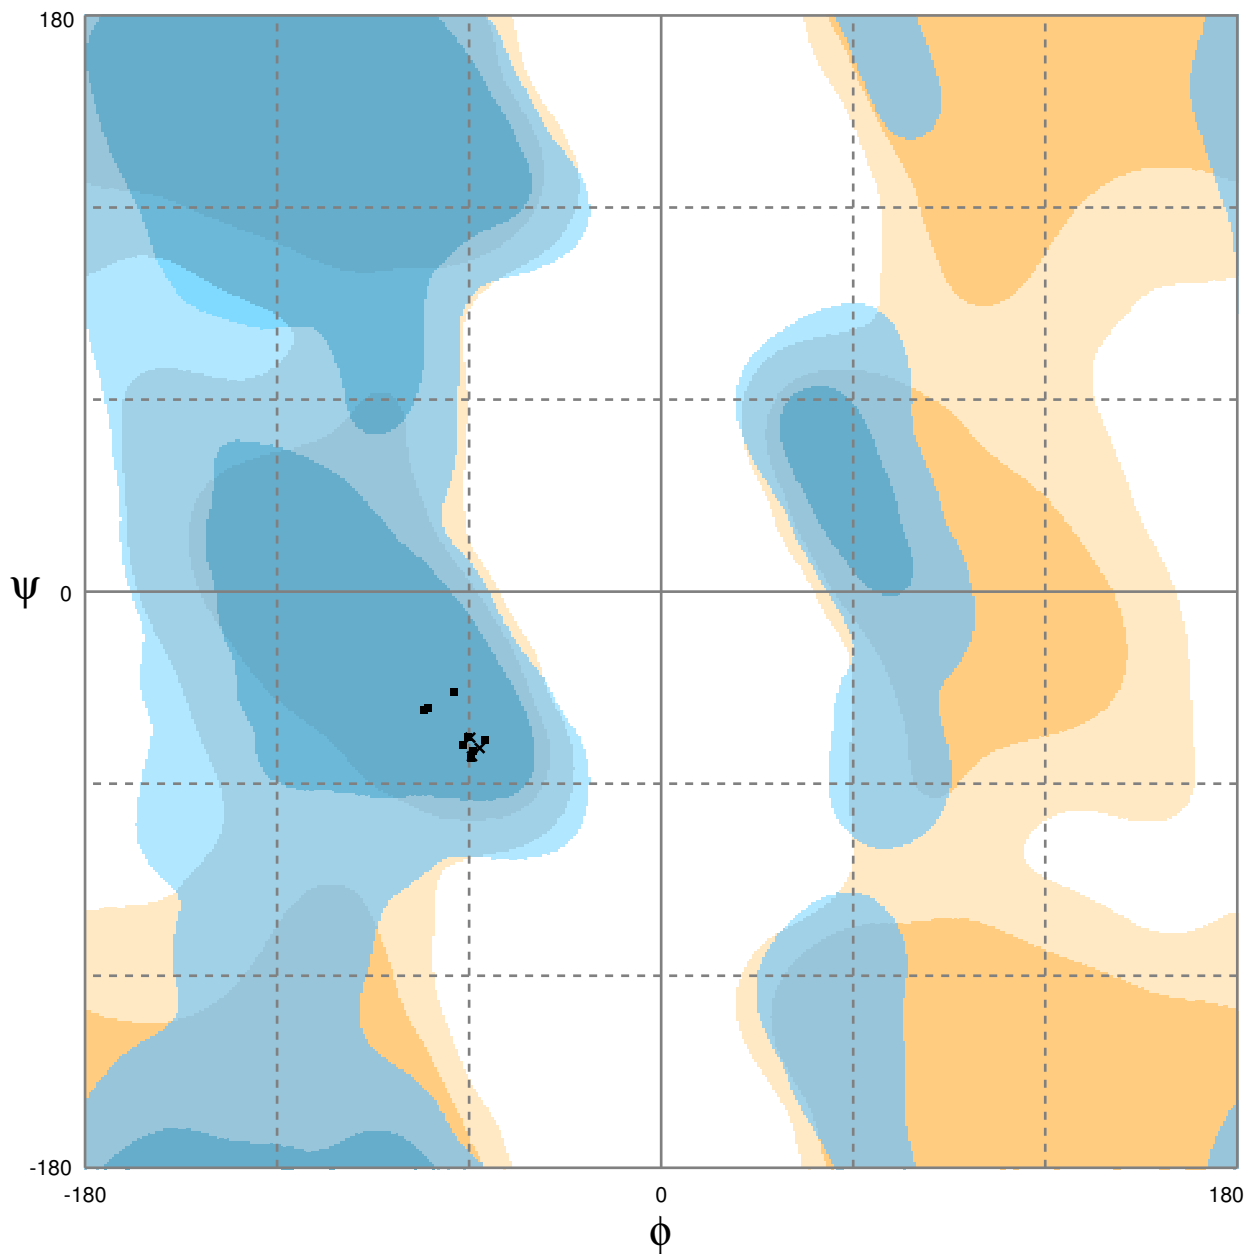

|                                                         |               |
|---------------------------------------------------------|---------------|
| Number of residues in favoured region (~98.0% expected) | : 11 (100.0%) |
| Number of residues in allowed region (~2.0% expected)   | : 0 (0.0%)    |
| Number of residues in outlier region                    | : 0 (0.0%)    |

RAMPAGE by Paul de Bakker and Simon Lovell available at <http://www-cryst.bioc.cam.ac.uk/rampage/>

Please cite: S.C. Lovell, I.W. Davis, W.B. Arendall III, P.I.W. de Bakker, J.M. Word, M.G. Prisant, J.S. Richardson & D.C. Richardson (2002) Structure validation by C $\alpha$  geometry:  $\phi/\psi$  and C $\beta$  deviation. *Proteins: Structure, Function & Genetics*. **50**: 437-450

# Tem\_sn4

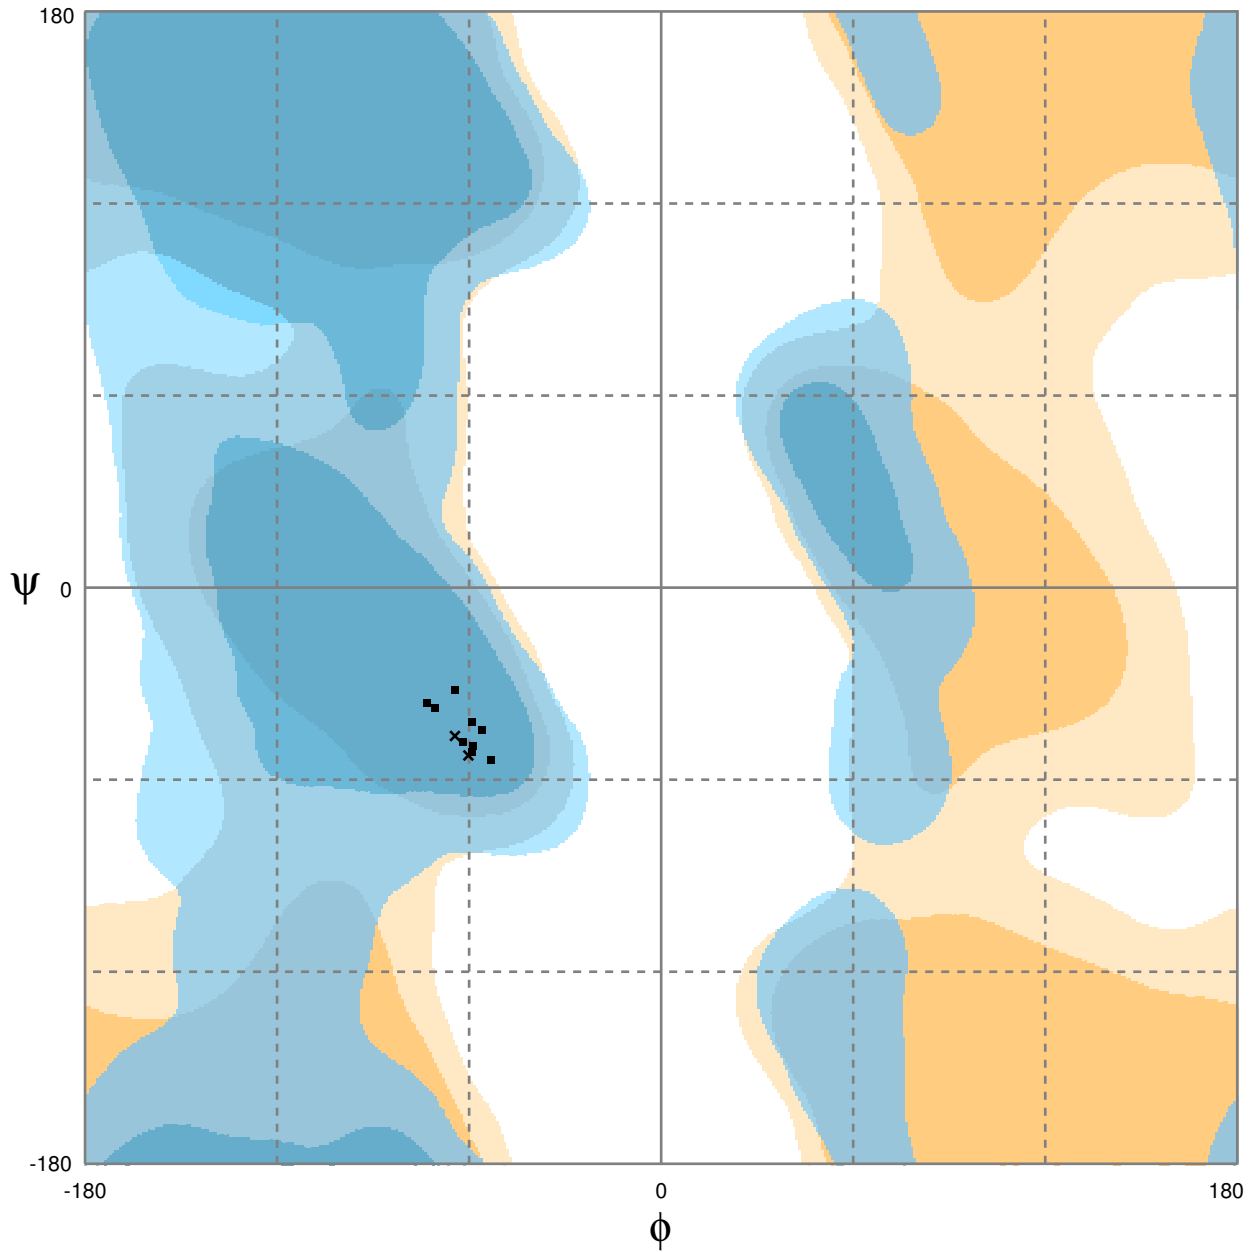

|                                                         |               |
|---------------------------------------------------------|---------------|
| Number of residues in favoured region (~98.0% expected) | : 11 (100.0%) |
| Number of residues in allowed region (~2.0% expected)   | : 0 (0.0%)    |
| Number of residues in outlier region                    | : 0 (0.0%)    |

RAMPAGE by Paul de Bakker and Simon Lovell available at <http://www-cryst.bioc.cam.ac.uk/rampage/>

Please cite: S.C. Lovell, I.W. Davis, W.B. Arendall III, P.I.W. de Bakker, J.M. Word, M.G. Prisant, J.S. Richardson & D.C. Richardson (2002) Structure validation by  $C\alpha$  geometry:  $\phi/\psi$  and  $C\beta$  deviation. *Proteins: Structure, Function & Genetics*. **50**: 437-450

# Tem\_tp1

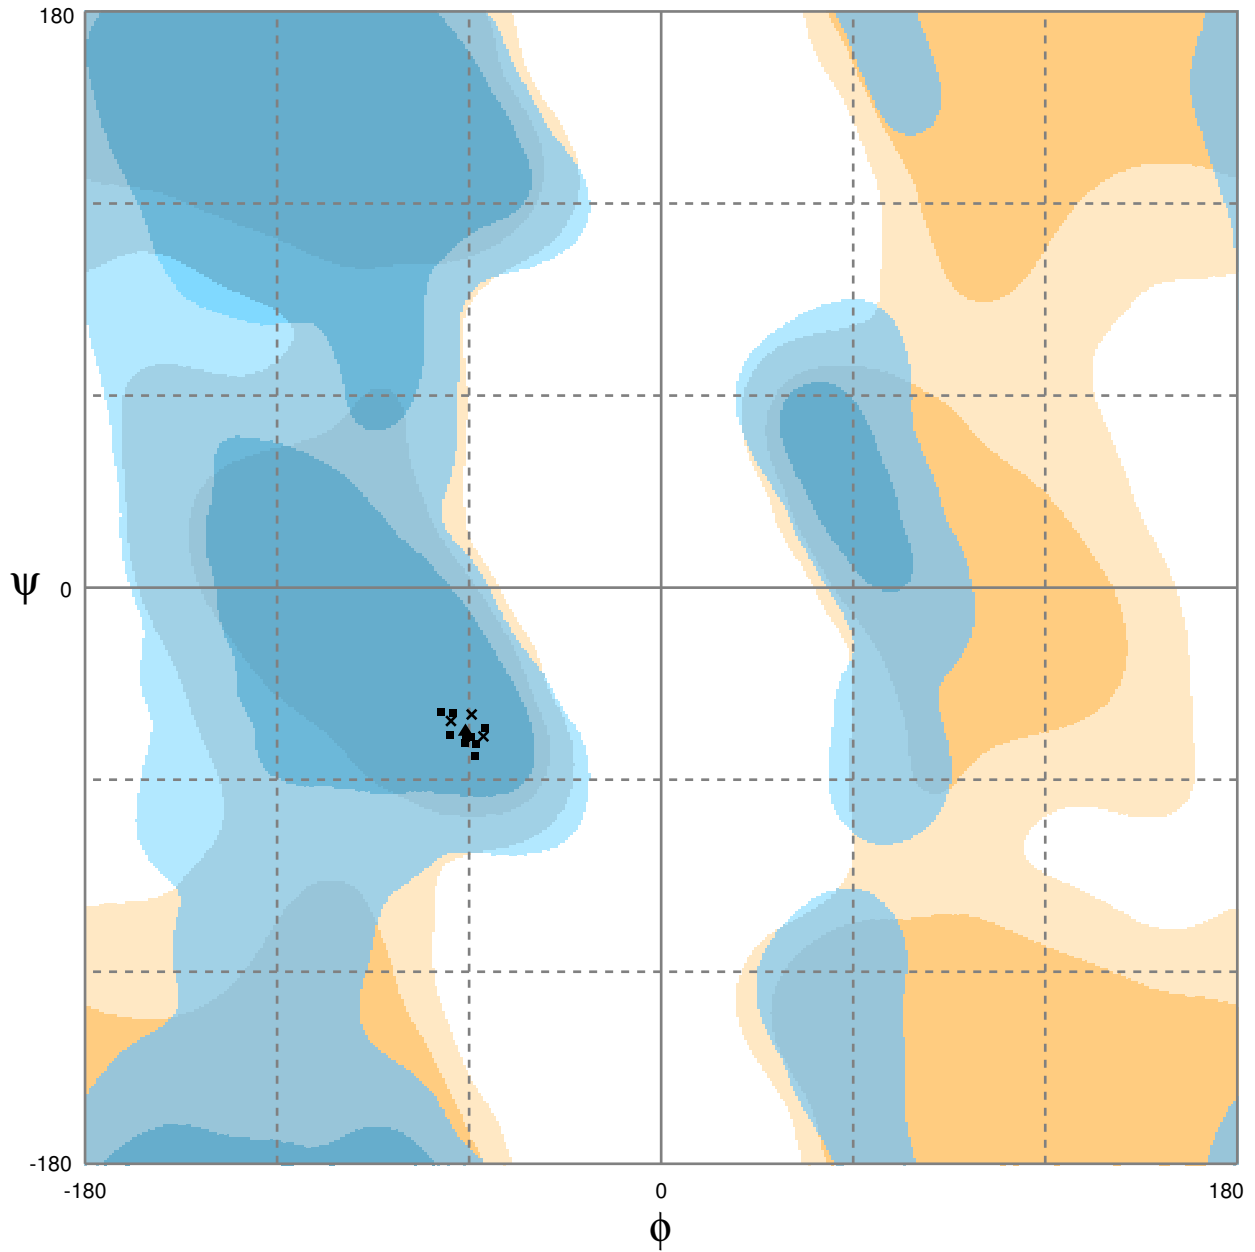

|                                                         |               |
|---------------------------------------------------------|---------------|
| Number of residues in favoured region (~98.0% expected) | : 14 (100.0%) |
| Number of residues in allowed region (~2.0% expected)   | : 0 (0.0%)    |
| Number of residues in outlier region                    | : 0 (0.0%)    |

RAMPAGE by Paul de Bakker and Simon Lovell available at <http://www-cryst.bioc.cam.ac.uk/rampage/>

Please cite: S.C. Lovell, I.W. Davis, W.B. Arendall III, P.I.W. de Bakker, J.M. Word, M.G. Prisant, J.S. Richardson & D.C. Richardson (2002) Structure validation by  $C\alpha$  geometry:  $\phi/\psi$  and  $C\beta$  deviation. *Proteins: Structure, Function & Genetics*. **50**: 437-450

# Tem\_tp2

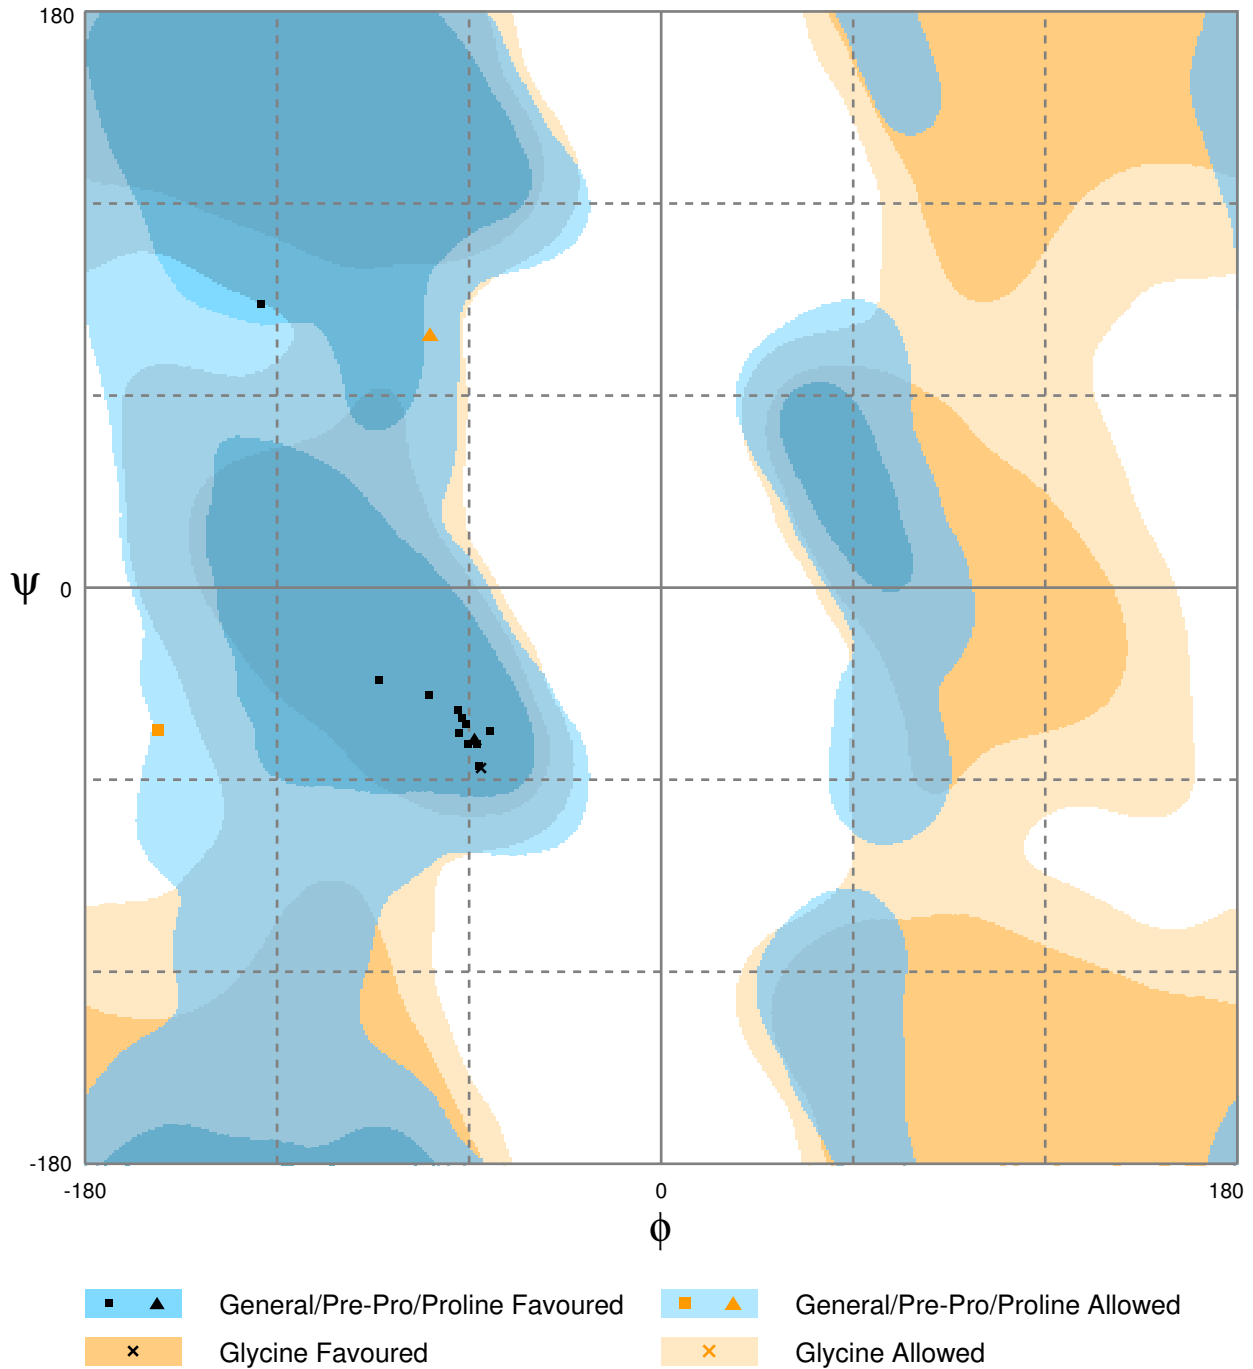

Number of residues in favoured region (~98.0% expected) : 13 (86.7%)  
 Number of residues in allowed region (~2.0% expected) : 2 (13.3%)  
 Number of residues in outlier region : 0 (0.0%)

RAMPAGE by Paul de Bakker and Simon Lovell available at <http://www-cryst.bioc.cam.ac.uk/rampage/>

Please cite: S.C. Lovell, I.W. Davis, W.B. Arendall III, P.I.W. de Bakker, J.M. Word, M.G. Prisant, J.S. Richardson & D.C. Richardson (2002) Structure validation by  $C\alpha$  geometry:  $\phi/\psi$  and  $C\beta$  deviation. *Proteins: Structure, Function & Genetics*. **50**: 437-450

# Tem\_tp3

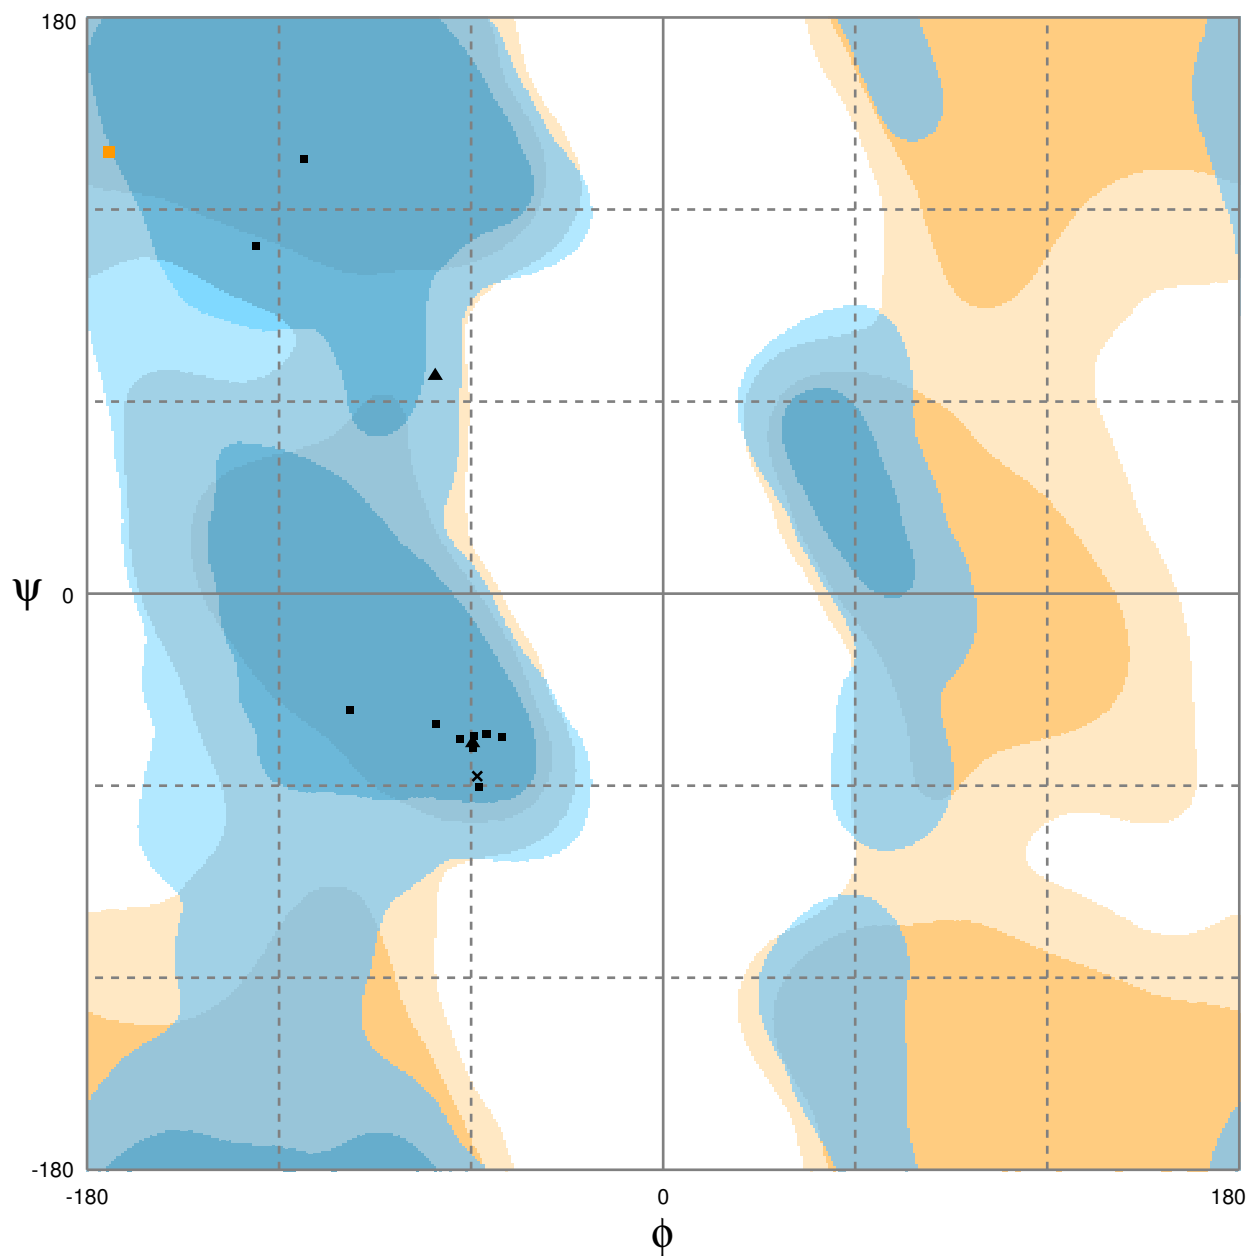

|                                                         |              |
|---------------------------------------------------------|--------------|
| Number of residues in favoured region (~98.0% expected) | : 14 (93.3%) |
| Number of residues in allowed region (~2.0% expected)   | : 1 (6.7%)   |
| Number of residues in outlier region                    | : 0 (0.0%)   |

RAMPAGE by Paul de Bakker and Simon Lovell available at <http://www-cryst.bioc.cam.ac.uk/rampage/>

Please cite: S.C. Lovell, I.W. Davis, W.B. Arendall III, P.I.W. de Bakker, J.M. Word, M.G. Prisant, J.S. Richardson & D.C. Richardson (2002) Structure validation by  $C\alpha$  geometry:  $\phi/\psi$  and  $C\beta$  deviation. *Proteins: Structure, Function & Genetics*. **50**: 437-450
